# Supplementary material for: High resolution spectroscopy of asymmetric top molecules in nonsinglet electronic states: the ν3 fundamental of chlorine dioxide (16O35Cl16O) free radical in the X2B1 electronic ground state
Source: Royal Society of Chemistry journal article supplement (doi:10.1039/d2cp05604f), 2023-01-01
Supplement: d2cp05604f1.zip [file d2cp05604f1.zip]

## Supplementary material S1

Line list of transitions of the  $\nu_1$  fundamental band of chlorine dioxide ( $^{16}\text{O}^{35}\text{Cl}^{16}\text{O}$ ).

Electronic supplementary material S1 to:

High resolution spectroscopy of asymmetric top molecules in nonsinglet electronic states: The  $\nu_3$  fundamental of chlorine dioxide ( $^{16}\text{O}^{35}\text{Cl}^{16}\text{O}$ ) free radical in the  $X^2B_1$  electronic ground state

- <sup>a)</sup> Quantum numbers of the upper vibrational state denoted with a single prime (');  $J' = N' + 1/2$  is denoted as "+",  $J = N - 1/2$  is denoted as "-".
- <sup>b)</sup> Quantum numbers of the ground vibrational state denoted with a double prime ("");  $J'' = N'' + 1/2$  is denoted as "+",  $J = N - 1/2$  is denoted as "-".
- <sup>c)</sup> Experimental wavenumber  $\nu$  (in  $\text{cm}^{-1}$ ).
- <sup>d)</sup> Transmittance (in %)
- <sup>e)</sup> Difference ( $\nu_{\text{exp}} - \nu_{\text{calc}}$ ) (in  $10^{-4} \text{ cm}^{-1}$ ).
- <sup>f)</sup> Number of spectrum .

| $N'$ | $K'_a$ | $K'_c$ | $J'^a)$ | $N''$ | $K''_a$ | $K''_c$ | $J''^b)$ | $\nu$ , exp. <sup>c)</sup> | Transm. <sup>d)</sup> | $\delta_\nu$ <sup>e)</sup> | Spectrum <sup>f)</sup> |
|------|--------|--------|---------|-------|---------|---------|----------|----------------------------|-----------------------|----------------------------|------------------------|
|      |        | 1      |         |       |         | 2       |          | 3                          | 4                     | 5                          | 6                      |
| 64   | 12     | 52     | +       | 64    | 14      | 51      | +        | 1029.3279                  | 99.0                  | -9                         | II                     |
| 55   | 6      | 50     | -       | 56    | 8       | 49      | -        | 1029.5265                  | 99.4                  | 4                          | II                     |
| 70   | 5      | 65     | +       | 71    | 7       | 64      | +        | 1031.2231                  | 99.0                  | 2                          | II                     |
| 62   | 7      | 55     | -       | 63    | 9       | 54      | -        | 1031.7641                  | 99.5                  | 3                          | II                     |
| 71   | 3      | 69     | -       | 71    | 3       | 68      | -        | 1034.4652                  | 99.0                  | 6                          | II                     |
| 60   | 11     | 49     | -       | 60    | 13      | 48      | -        | 1036.0478                  | 99.3                  | 2                          | II                     |
| 72   | 1      | 71     | -       | 71    | 3       | 68      | -        | 1038.6342                  | 99.5                  | -2                         | II                     |
| 62   | 7      | 55     | +       | 63    | 9       | 54      | +        | 1038.7564                  | 99.0                  | -5                         | II                     |
| 63   | 5      | 59     | -       | 64    | 5       | 60      | -        | 1038.8764                  | 99.0                  | -19                        | II                     |
| 56   | 6      | 50     | -       | 57    | 8       | 49      | -        | 1040.8613                  | 99.3                  | -7                         | II                     |
| 56   | 6      | 50     | +       | 57    | 8       | 49      | +        | 1040.8728                  | 99.2                  | 2                          | II                     |
| 54   | 6      | 48     | -       | 55    | 8       | 47      | -        | 1042.0572                  | 99.2                  | 0                          | II                     |
| 60   | 10     | 50     | +       | 60    | 12      | 49      | +        | 1042.6537                  | 99.0                  | -2                         | II                     |
| 58   | 10     | 48     | -       | 58    | 12      | 47      | -        | 1042.6776                  | 99.0                  | -7                         | II                     |
| 64   | 10     | 54     | -       | 64    | 12      | 53      | -        | 1042.7282                  | 98.9                  | 1                          | II                     |
| 66   | 10     | 56     | -       | 66    | 12      | 55      | -        | 1042.8938                  | 98.9                  | -8                         | II                     |
| 66   | 7      | 59     | -       | 67    | 7       | 60      | -        | 1046.9433                  | 98.9                  | -1                         | II                     |
| 52   | 9      | 43     | -       | 52    | 11      | 42      | -        | 1049.4418                  | 98.7                  | -2                         | II                     |
| 54   | 9      | 45     | -       | 54    | 11      | 44      | -        | 1049.4586                  | 98.7                  | -8                         | II                     |
| 56   | 9      | 47     | -       | 56    | 11      | 46      | -        | 1049.5422                  | 97.9                  | 7                          | II                     |
| 84   | 0      | 84     | -       | 85    | 0       | 85      | -        | 1052.4100                  | 97.9                  | 4                          | II                     |
| 83   | 1      | 83     | +       | 84    | 1       | 84      | +        | 1053.2062                  | 98.7                  | 4                          | II                     |
| 66   | 5      | 61     | -       | 67    | 5       | 62      | -        | 1053.8240                  | 99.3                  | 2                          | II                     |
| 81   | 1      | 81     | -       | 82    | 1       | 82      | -        | 1054.7751                  | 96.6                  | 3                          | II                     |
| 80   | 0      | 80     | -       | 81    | 0       | 81      | -        | 1055.5576                  | 96.4                  | 3                          | II                     |
| 79   | 1      | 79     | -       | 80    | 1       | 80      | -        | 1056.3378                  | 95.9                  | 3                          | II                     |
| 79   | 1      | 79     | +       | 80    | 1       | 80      | +        | 1056.3378                  | 95.9                  | -21                        | II                     |
| 78   | 0      | 78     | -       | 79    | 0       | 79      | -        | 1057.1150                  | 89.1                  | 3                          | II                     |
| 78   | 0      | 78     | +       | 79    | 0       | 79      | +        | 1057.1171                  | 92.5                  | 1                          | II                     |
| 76   | 1      | 75     | +       | 77    | 1       | 76      | +        | 1057.7683                  | 98.5                  | 9                          | II                     |
| 76   | 1      | 75     | +       | 77    | 1       | 76      | +        | 1057.7683                  | 98.5                  | 9                          | II                     |
| 77   | 1      | 77     | -       | 78    | 1       | 78      | -        | 1057.8894                  | 95.2                  | -1                         | II                     |
| 77   | 1      | 77     | +       | 78    | 1       | 78      | +        | 1057.8894                  | 95.2                  | -16                        | II                     |
| 58   | 8      | 50     | -       | 58    | 10      | 49      | -        | 1058.4733                  | 97.8                  | -4                         | II                     |
| 76   | 0      | 76     | -       | 77    | 0       | 77      | -        | 1058.6613                  | 94.4                  | 2                          | II                     |
| 74   | 1      | 73     | -       | 75    | 1       | 74      | -        | 1059.3081                  | 92.9                  | -3                         | II                     |
| 75   | 1      | 75     | +       | 76    | 1       | 76      | +        | 1059.4302                  | 92.3                  | -11                        | II                     |
| 75   | 1      | 75     | -       | 76    | 1       | 76      | -        | 1059.4302                  | 92.3                  | -2                         | II                     |
| 60   | 8      | 52     | +       | 60    | 10      | 51      | +        | 1059.5104                  | 98.5                  | -4                         | II                     |
| 72   | 2      | 70     | -       | 73    | 2       | 71      | -        | 1059.9805                  | 86.7                  | 14                         | II                     |
| 66   | 10     | 56     | -       | 67    | 10      | 57      | -        | 1059.9835                  | 87.7                  | -6                         | II                     |
| 66   | 10     | 56     | -       | 67    | 10      | 57      | -        | 1059.9835                  | 87.7                  | -6                         | II                     |
| 74   | 0      | 74     | -       | 75    | 0       | 75      | -        | 1060.1967                  | 90.5                  | 1                          | II                     |
| 74   | 0      | 74     | +       | 75    | 0       | 75      | +        | 1060.1967                  | 90.5                  | -9                         | II                     |
| 66   | 7      | 59     | +       | 67    | 9       | 58      | +        | 1060.5658                  | 98.8                  | -1                         | II                     |
| 65   | 12     | 54     | -       | 66    | 12      | 55      | -        | 1060.6268                  | 95.0                  | 2                          | II                     |
| 65   | 11     | 55     | +       | 66    | 11      | 56      | +        | 1060.8176                  | 91.1                  | -7                         | II                     |
| 65   | 11     | 55     | +       | 66    | 11      | 56      | +        | 1060.8176                  | 91.1                  | -7                         | II                     |
| 64   | 14     | 50     | -       | 65    | 14      | 51      | -        | 1060.9090                  | 95.5                  | 0                          | II                     |
| 73   | 1      | 73     | -       | 74    | 1       | 74      | -        | 1060.9602                  | 90.2                  | -2                         | II                     |
| 73   | 1      | 73     | +       | 74    | 1       | 74      | +        | 1060.9602                  | 90.2                  | -7                         | II                     |
| 66   | 6      | 60     | -       | 67    | 6       | 61      | -        | 1061.1783                  | 98.0                  | 3                          | II                     |
| 64   | 13     | 51     | -       | 65    | 13      | 52      | -        | 1061.2061                  | 87.3                  | 0                          | II                     |
| 64   | 12     | 52     | +       | 65    | 12      | 53      | +        | 1061.4554                  | 90.9                  | 9                          | II                     |
| 70   | 2      | 68     | -       | 71    | 2       | 69      | -        | 1061.5084                  | 91.8                  | -3                         | II                     |
| 70   | 2      | 68     | +       | 71    | 2       | 69      | +        | 1061.5084                  | 91.8                  | 1                          | II                     |
| 71   | 2      | 70     | +       | 72    | 2       | 71      | +        | 1061.6052                  | 77.4                  | 17                         | II                     |
| 64   | 11     | 53     | +       | 65    | 11      | 54      | +        | 1061.6446                  | 82.2                  | -4                         | II                     |
| 64   | 11     | 53     | -       | 65    | 11      | 54      | -        | 1061.6446                  | 82.2                  | -20                        | II                     |
| 64   | 10     | 54     | +       | 65    | 10      | 55      | +        | 1061.7195                  | 85.5                  | -14                        | II                     |
| 72   | 0      | 72     | +       | 73    | 0       | 73      | +        | 1061.7195                  | 85.5                  | -22                        | II                     |
| 64   | 10     | 54     | -       | 65    | 10      | 55      | -        | 1061.7195                  | 85.5                  | -15                        | II                     |
| 72   | 0      | 72     | -       | 73    | 0       | 73      | -        | 1061.7195                  | 85.5                  | -17                        | II                     |
| 63   | 14     | 50     | -       | 64    | 14      | 51      | -        | 1061.7271                  | 92.7                  | -3                         | II                     |
| 76   | 1      | 75     | -       | 76    | 3       | 74      | -        | 1061.8316                  | 97.6                  | -2                         | II                     |
| 63   | 13     | 51     | +       | 64    | 13      | 52      | +        | 1062.0255                  | 94.5                  | 2                          | II                     |
| 63   | 13     | 51     | -       | 64    | 13      | 52      | -        | 1062.0281                  | 91.2                  | -7                         | II                     |
| 68   | 3      | 65     | +       | 69    | 3       | 66      | +        | 1062.1965                  | 95.6                  | 1                          | II                     |
| 70   | 1      | 69     | +       | 71    | 1       | 70      | +        | 1062.3623                  | 72.6                  | -6                         | II                     |
| 70   | 1      | 69     | -       | 71    | 1       | 70      | -        | 1062.3623                  | 72.6                  | -3                         | II                     |
| 71   | 1      | 71     | -       | 72    | 1       | 72      | -        | 1062.4792                  | 85.2                  | -2                         | II                     |
| 71   | 1      | 71     | +       | 72    | 1       | 72      | +        | 1062.4792                  | 85.2                  | -4                         | II                     |

| $N'$ | $K'_a$ | $K'_c$ | $J'^a)$ | $N''$ | $K''_a$ | $K''_c$ | $J''^b)$ | $\nu$ , exp. <sup>c)</sup> | Transm. <sup>d)</sup> | $\delta_\nu$ <sup>e)</sup> | Spectrum <sup>f)</sup> |
|------|--------|--------|---------|-------|---------|---------|----------|----------------------------|-----------------------|----------------------------|------------------------|
|      |        | 1      |         |       |         | 2       |          | 3                          | 4                     | 5                          | 6                      |
| 63   | 11     | 53     | +       | 64    | 11      | 54      | +        | 1062.4900                  | 87.8                  | -3                         | II                     |
| 62   | 14     | 48     | -       | 63    | 14      | 49      | -        | 1062.5426                  | 92.8                  | 3                          | II                     |
| 62   | 13     | 49     | -       | 63    | 13      | 50      | -        | 1062.8476                  | 74.2                  | -3                         | II                     |
| 62   | 8      | 54     | -       | 63    | 8       | 55      | -        | 1062.9940                  | 87.8                  | 3                          | II                     |
| 62   | 12     | 50     | -       | 63    | 12      | 51      | -        | 1063.1097                  | 85.7                  | 1                          | II                     |
| 69   | 2      | 68     | -       | 70    | 2       | 69      | -        | 1063.1173                  | 85.6                  | -21                        | II                     |
| 69   | 2      | 68     | +       | 70    | 2       | 69      | +        | 1063.1173                  | 85.6                  | -22                        | II                     |
| 70   | 0      | 70     | +       | 71    | 0       | 71      | +        | 1063.2347                  | 82.0                  | -3                         | II                     |
| 70   | 0      | 70     | -       | 71    | 0       | 71      | -        | 1063.2347                  | 82.0                  | -1                         | II                     |
| 62   | 11     | 51     | +       | 63    | 11      | 52      | +        | 1063.3143                  | 83.4                  | 1                          | II                     |
| 62   | 11     | 51     | -       | 63    | 11      | 52      | -        | 1063.3143                  | 83.4                  | -15                        | II                     |
| 61   | 14     | 48     | -       | 62    | 14      | 49      | -        | 1063.3539                  | 87.2                  | 0                          | II                     |
| 74   | 1      | 73     | +       | 74    | 3       | 72      | +        | 1063.4144                  | 96.2                  | -5                         | II                     |
| 64   | 5      | 59     | +       | 65    | 5       | 60      | +        | 1063.5861                  | 86.6                  | -4                         | II                     |
| 65   | 5      | 61     | -       | 66    | 5       | 62      | -        | 1063.6605                  | 91.9                  | -3                         | II                     |
| 61   | 13     | 49     | +       | 62    | 13      | 50      | +        | 1063.6605                  | 91.9                  | 5                          | II                     |
| 61   | 13     | 49     | -       | 62    | 13      | 50      | -        | 1063.6629                  | 91.9                  | -5                         | II                     |
| 68   | 1      | 67     | -       | 69    | 1       | 68      | -        | 1063.8717                  | 83.2                  | -18                        | II                     |
| 61   | 12     | 50     | +       | 62    | 12      | 51      | +        | 1063.9280                  | 90.3                  | -1                         | II                     |
| 61   | 12     | 50     | -       | 62    | 12      | 51      | -        | 1063.9297                  | 90.9                  | -9                         | II                     |
| 69   | 1      | 69     | +       | 70    | 1       | 70      | +        | 1063.9857                  | 46.8                  | -18                        | II                     |
| 69   | 1      | 69     | -       | 70    | 1       | 70      | -        | 1063.9857                  | 46.8                  | -19                        | II                     |
| 61   | 11     | 51     | +       | 62    | 11      | 52      | +        | 1064.1467                  | 84.2                  | -1                         | II                     |
| 60   | 14     | 46     | -       | 61    | 14      | 47      | -        | 1064.1624                  | 91.4                  | 3                          | II                     |
| 61   | 10     | 52     | +       | 62    | 10      | 53      | +        | 1064.3126                  | 75.2                  | -7                         | II                     |
| 61   | 10     | 52     | +       | 62    | 10      | 53      | +        | 1064.3126                  | 75.2                  | -7                         | II                     |
| 60   | 13     | 47     | -       | 61    | 13      | 48      | -        | 1064.4751                  | 90.8                  | -3                         | II                     |
| 67   | 2      | 66     | -       | 68    | 2       | 67      | -        | 1064.6235                  | 79.6                  | -15                        | II                     |
| 67   | 2      | 66     | +       | 68    | 2       | 67      | +        | 1064.6235                  | 79.6                  | -14                        | II                     |
| 68   | 0      | 68     | +       | 69    | 0       | 69      | +        | 1064.7374                  | 78.6                  | -2                         | II                     |
| 68   | 0      | 68     | -       | 69    | 0       | 69      | -        | 1064.7374                  | 78.6                  | -1                         | II                     |
| 60   | 12     | 48     | +       | 61    | 12      | 49      | +        | 1064.7446                  | 88.7                  | 2                          | II                     |
| 60   | 8      | 52     | -       | 61    | 8       | 53      | -        | 1064.7618                  | 84.2                  | 4                          | II                     |
| 72   | 1      | 71     | -       | 72    | 3       | 70      | -        | 1064.9148                  | 88.5                  | -3                         | II                     |
| 74   | 2      | 72     | +       | 74    | 4       | 71      | +        | 1064.9263                  | 97.7                  | 2                          | II                     |
| 60   | 11     | 49     | -       | 61    | 11      | 50      | -        | 1064.9660                  | 80.1                  | -12                        | II                     |
| 60   | 11     | 49     | +       | 61    | 11      | 50      | +        | 1064.9660                  | 80.1                  | 3                          | II                     |
| 60   | 10     | 50     | +       | 61    | 10      | 51      | +        | 1065.1083                  | 76.7                  | -8                         | II                     |
| 60   | 10     | 50     | -       | 61    | 10      | 51      | -        | 1065.1083                  | 76.7                  | -11                        | II                     |
| 59   | 13     | 47     | +       | 60    | 13      | 48      | +        | 1065.2809                  | 88.7                  | 5                          | II                     |
| 59   | 13     | 47     | -       | 60    | 13      | 48      | -        | 1065.2836                  | 73.6                  | -3                         | II                     |
| 65   | 3      | 63     | +       | 66    | 3       | 64      | +        | 1065.2836                  | 73.6                  | -20                        | II                     |
| 65   | 3      | 63     | -       | 66    | 3       | 64      | -        | 1065.2836                  | 73.6                  | -26                        | II                     |
| 66   | 1      | 65     | +       | 67    | 1       | 66      | +        | 1065.3757                  | 78.8                  | 21                         | II                     |
| 67   | 1      | 67     | -       | 68    | 1       | 68      | -        | 1065.4844                  | 58.7                  | -4                         | II                     |
| 67   | 1      | 67     | +       | 68    | 1       | 68      | +        | 1065.4844                  | 58.7                  | -2                         | II                     |
| 68   | 5      | 63     | -       | 69    | 5       | 64      | -        | 1065.5476                  | 98.3                  | 1                          | II                     |
| 59   | 12     | 48     | +       | 60    | 12      | 49      | +        | 1065.5576                  | 85.5                  | 0                          | II                     |
| 71   | 2      | 70     | +       | 71    | 2       | 69      | +        | 1065.7190                  | 79.3                  | -10                        | II                     |
| 62   | 4      | 58     | +       | 63    | 4       | 59      | +        | 1065.9107                  | 63.2                  | 3                          | II                     |
| 59   | 10     | 50     | +       | 60    | 10      | 51      | +        | 1065.9644                  | 61.1                  | -8                         | II                     |
| 59   | 10     | 50     | -       | 60    | 10      | 51      | -        | 1065.9644                  | 61.1                  | -14                        | II                     |
| 58   | 13     | 45     | +       | 59    | 13      | 46      | +        | 1066.0849                  | 39.7                  | -5                         | II                     |
| 65   | 2      | 64     | +       | 66    | 2       | 65      | +        | 1066.1190                  | 69.9                  | -5                         | II                     |
| 65   | 2      | 64     | -       | 66    | 2       | 65      | -        | 1066.1190                  | 69.9                  | -7                         | II                     |
| 66   | 0      | 66     | -       | 67    | 0       | 67      | -        | 1066.2291                  | 61.1                  | -1                         | II                     |
| 66   | 0      | 66     | +       | 67    | 0       | 67      | +        | 1066.2291                  | 61.1                  | 1                          | II                     |
| 59   | 8      | 52     | +       | 60    | 8       | 53      | +        | 1066.3224                  | 70.8                  | -5                         | II                     |
| 58   | 12     | 46     | +       | 59    | 12      | 47      | +        | 1066.3666                  | 83.5                  | 0                          | II                     |
| 58   | 12     | 46     | -       | 59    | 12      | 47      | -        | 1066.3685                  | 82.7                  | -7                         | II                     |
| 58   | 7      | 51     | -       | 59    | 7       | 52      | -        | 1066.3941                  | 46.8                  | -5                         | II                     |
| 58   | 7      | 51     | +       | 59    | 7       | 52      | +        | 1066.3941                  | 46.8                  | 2                          | II                     |
| 72   | 2      | 70     | +       | 72    | 4       | 69      | +        | 1066.4774                  | 95.6                  | -14                        | II                     |
| 58   | 8      | 50     | -       | 59    | 8       | 51      | -        | 1066.5342                  | 80.5                  | 5                          | II                     |
| 58   | 8      | 50     | +       | 59    | 8       | 51      | +        | 1066.5380                  | 77.6                  | 11                         | II                     |
| 60   | 5      | 55     | +       | 61    | 5       | 56      | +        | 1066.5578                  | 71.5                  | 13                         | II                     |
| 60   | 5      | 55     | -       | 61    | 5       | 56      | -        | 1066.5578                  | 71.5                  | -19                        | II                     |
| 57   | 14     | 44     | -       | 58    | 14      | 45      | -        | 1066.5664                  | 89.2                  | 2                          | II                     |
| 58   | 11     | 47     | -       | 59    | 11      | 48      | -        | 1066.6012                  | 68.3                  | -8                         | II                     |
| 61   | 5      | 57     | +       | 62    | 5       | 58      | +        | 1066.6631                  | 80.0                  | -5                         | II                     |
| 61   | 5      | 57     | -       | 62    | 5       | 58      | -        | 1066.6680                  | 68.0                  | 28                         | II                     |
| 62   | 3      | 59     | -       | 63    | 3       | 60      | -        | 1066.7121                  | 76.0                  | -12                        | II                     |

| $N'$ | $K'_a$ | $K'_c$ | $J'^a)$ | $N''$ | $K''_a$ | $K''_c$ | $J''^b)$ | $\nu$ , exp. <sup>c)</sup> | Transm. <sup>d)</sup> | $\delta_\nu$ <sup>e)</sup> | Spectrum <sup>f)</sup> |
|------|--------|--------|---------|-------|---------|---------|----------|----------------------------|-----------------------|----------------------------|------------------------|
|      |        | 1      |         |       |         | 2       |          | 3                          | 4                     | 5                          | 6                      |
| 62   | 3      | 59     | +       | 63    | 3       | 60      | +        | 1066.7121                  | 76.0                  | -3                         | II                     |
| 58   | 10     | 48     | +       | 59    | 10      | 49      | +        | 1066.7665                  | 66.5                  | -5                         | II                     |
| 58   | 10     | 48     | -       | 59    | 10      | 49      | -        | 1066.7665                  | 66.5                  | -10                        | II                     |
| 58   | 9      | 49     | +       | 59    | 9       | 50      | +        | 1066.7937                  | 77.5                  | -5                         | II                     |
| 58   | 9      | 49     | -       | 59    | 9       | 50      | -        | 1066.7937                  | 77.5                  | 9                          | II                     |
| 64   | 1      | 63     | +       | 65    | 1       | 64      | +        | 1066.8619                  | 63.5                  | -10                        | II                     |
| 64   | 1      | 63     | -       | 65    | 1       | 64      | -        | 1066.8619                  | 63.5                  | -12                        | II                     |
| 57   | 13     | 45     | +       | 58    | 13      | 46      | +        | 1066.8870                  | 87.0                  | 3                          | II                     |
| 57   | 13     | 45     | -       | 58    | 13      | 46      | -        | 1066.8900                  | 86.9                  | -2                         | II                     |
| 65   | 1      | 65     | -       | 66    | 1       | 66      | -        | 1066.9708                  | 63.4                  | -3                         | II                     |
| 65   | 1      | 65     | +       | 66    | 1       | 66      | +        | 1066.9708                  | 63.4                  | 0                          | II                     |
| 57   | 12     | 46     | -       | 58    | 12      | 47      | -        | 1067.1740                  | 81.1                  | -9                         | II                     |
| 56   | 14     | 42     | +       | 57    | 14      | 43      | +        | 1067.3570                  | 86.5                  | 6                          | II                     |
| 56   | 14     | 42     | -       | 57    | 14      | 43      | -        | 1067.3610                  | 77.9                  | 0                          | II                     |
| 59   | 6      | 54     | -       | 60    | 6       | 55      | -        | 1067.3959                  | 75.6                  | 2                          | II                     |
| 60   | 4      | 56     | +       | 61    | 4       | 57      | +        | 1067.3986                  | 76.2                  | 1                          | II                     |
| 57   | 11     | 47     | +       | 58    | 11      | 48      | +        | 1067.4131                  | 75.7                  | 3                          | II                     |
| 57   | 11     | 47     | -       | 58    | 11      | 48      | -        | 1067.4131                  | 75.7                  | -13                        | II                     |
| 61   | 4      | 58     | +       | 62    | 4       | 59      | +        | 1067.4555                  | 72.1                  | -6                         | II                     |
| 62   | 2      | 60     | +       | 63    | 2       | 61      | +        | 1067.5189                  | 70.1                  | -10                        | II                     |
| 57   | 10     | 48     | +       | 58    | 10      | 49      | +        | 1067.6020                  | 48.9                  | 2                          | II                     |
| 63   | 2      | 62     | -       | 64    | 2       | 63      | -        | 1067.6020                  | 48.9                  | -17                        | II                     |
| 57   | 10     | 48     | -       | 58    | 10      | 49      | -        | 1067.6020                  | 48.9                  | -5                         | II                     |
| 63   | 2      | 62     | +       | 64    | 2       | 63      | +        | 1067.6020                  | 48.9                  | -14                        | II                     |
| 56   | 13     | 43     | +       | 57    | 13      | 44      | +        | 1067.6851                  | 72.6                  | 5                          | II                     |
| 56   | 13     | 43     | -       | 57    | 13      | 44      | -        | 1067.6878                  | 78.6                  | -3                         | II                     |
| 64   | 0      | 64     | -       | 65    | 0       | 65      | -        | 1067.7100                  | 62.0                  | -1                         | II                     |
| 64   | 0      | 64     | +       | 65    | 0       | 65      | +        | 1067.7100                  | 62.0                  | 1                          | II                     |
| 57   | 9      | 49     | -       | 58    | 9       | 50      | -        | 1067.7487                  | 60.0                  | 0                          | II                     |
| 57   | 9      | 49     | +       | 58    | 9       | 50      | +        | 1067.7487                  | 60.0                  | 3                          | II                     |
| 55   | 15     | 41     | -       | 56    | 15      | 42      | -        | 1067.7884                  | 85.2                  | 12                         | II                     |
| 57   | 8      | 50     | +       | 58    | 8       | 51      | +        | 1067.9291                  | 54.7                  | -6                         | II                     |
| 56   | 12     | 44     | +       | 57    | 12      | 45      | +        | 1067.9741                  | 59.8                  | 0                          | II                     |
| 56   | 12     | 44     | -       | 57    | 12      | 45      | -        | 1067.9772                  | 46.6                  | 5                          | II                     |
| 58   | 5      | 53     | +       | 59    | 5       | 54      | +        | 1068.0119                  | 72.0                  | -19                        | II                     |
| 56   | 7      | 49     | -       | 57    | 7       | 50      | -        | 1068.0497                  | 66.5                  | 8                          | II                     |
| 56   | 7      | 49     | +       | 57    | 7       | 50      | +        | 1068.0510                  | 67.2                  | 3                          | II                     |
| 55   | 14     | 42     | +       | 56    | 14      | 43      | +        | 1068.1482                  | 63.7                  | 6                          | II                     |
| 59   | 5      | 55     | +       | 60    | 5       | 56      | +        | 1068.1506                  | 73.2                  | 2                          | II                     |
| 59   | 5      | 55     | -       | 60    | 5       | 56      | -        | 1068.1506                  | 73.2                  | -13                        | II                     |
| 60   | 3      | 57     | +       | 61    | 3       | 58      | +        | 1068.1957                  | 73.3                  | -4                         | II                     |
| 56   | 11     | 45     | +       | 57    | 11      | 46      | +        | 1068.2191                  | 71.1                  | 3                          | II                     |
| 61   | 3      | 59     | -       | 62    | 3       | 60      | -        | 1068.2583                  | 67.3                  | -15                        | II                     |
| 61   | 3      | 59     | +       | 62    | 3       | 60      | +        | 1068.2583                  | 67.3                  | -11                        | II                     |
| 57   | 7      | 51     | +       | 58    | 7       | 52      | +        | 1068.2922                  | 68.0                  | 2                          | II                     |
| 56   | 8      | 48     | -       | 57    | 8       | 49      | -        | 1068.2942                  | 69.9                  | 2                          | II                     |
| 57   | 7      | 51     | -       | 58    | 7       | 52      | -        | 1068.2942                  | 69.9                  | 8                          | II                     |
| 56   | 8      | 48     | +       | 57    | 8       | 49      | +        | 1068.2980                  | 73.0                  | 7                          | II                     |
| 62   | 1      | 61     | +       | 63    | 1       | 62      | +        | 1068.3411                  | 48.8                  | -2                         | II                     |
| 62   | 1      | 61     | -       | 63    | 1       | 62      | -        | 1068.3411                  | 48.8                  | -4                         | II                     |
| 56   | 10     | 46     | -       | 57    | 10      | 47      | -        | 1068.4041                  | 54.2                  | -7                         | II                     |
| 56   | 10     | 46     | +       | 57    | 10      | 47      | +        | 1068.4041                  | 54.2                  | -1                         | II                     |
| 63   | 1      | 63     | +       | 64    | 1       | 64      | +        | 1068.4463                  | 96.1                  | 2                          | I                      |
| 63   | 1      | 63     | -       | 64    | 1       | 64      | -        | 1068.4463                  | 96.1                  | -1                         | I                      |
| 55   | 13     | 43     | +       | 56    | 13      | 44      | +        | 1068.4795                  | 44.1                  | 5                          | II                     |
| 56   | 9      | 47     | +       | 57    | 9       | 48      | +        | 1068.4795                  | 44.1                  | 5                          | II                     |
| 54   | 15     | 39     | -       | 55    | 15      | 40      | -        | 1068.5730                  | 82.0                  | 6                          | II                     |
| 55   | 12     | 44     | +       | 56    | 12      | 45      | +        | 1068.7719                  | 20.8                  | -4                         | II                     |
| 58   | 4      | 54     | +       | 59    | 4       | 55      | +        | 1068.8745                  | 69.7                  | 6                          | II                     |
| 58   | 4      | 54     | -       | 59    | 4       | 55      | -        | 1068.8745                  | 69.7                  | -11                        | II                     |
| 57   | 6      | 52     | +       | 58    | 6       | 53      | +        | 1068.8916                  | 70.0                  | 8                          | II                     |
| 54   | 14     | 40     | +       | 55    | 14      | 41      | +        | 1068.9349                  | 66.2                  | -6                         | II                     |
| 59   | 4      | 56     | +       | 60    | 4       | 57      | +        | 1068.9349                  | 66.2                  | 2                          | II                     |
| 59   | 4      | 56     | -       | 60    | 4       | 57      | -        | 1068.9349                  | 66.2                  | -6                         | II                     |
| 54   | 14     | 40     | -       | 55    | 14      | 41      | -        | 1068.9403                  | 83.1                  | 1                          | II                     |
| 60   | 2      | 58     | -       | 61    | 2       | 59      | -        | 1068.9953                  | 64.3                  | -12                        | II                     |
| 60   | 2      | 58     | +       | 61    | 2       | 59      | +        | 1068.9953                  | 64.3                  | -8                         | II                     |
| 55   | 11     | 45     | +       | 56    | 11      | 46      | +        | 1069.0230                  | 71.7                  | 3                          | II                     |
| 61   | 2      | 60     | +       | 62    | 2       | 61      | +        | 1069.0787                  | 18.4                  | 22                         | II                     |
| 62   | 0      | 62     | -       | 63    | 0       | 63      | -        | 1069.1800                  | 93.7                  | 1                          | I                      |
| 62   | 0      | 62     | +       | 63    | 0       | 63      | +        | 1069.1800                  | 93.7                  | 3                          | I                      |
| 55   | 10     | 46     | -       | 56    | 10      | 47      | -        | 1069.2230                  | 58.4                  | -8                         | II                     |

| $N'$ | $K'_a$ | $K'_c$ | $J'^a)$ | $N''$ | $K''_a$ | $K''_c$ | $J''^b)$ | $\nu$ , exp. <sup>c)</sup> | Transm. <sup>d)</sup> | $\delta_\nu$ <sup>e)</sup> | Spectrum <sup>f)</sup> |
|------|--------|--------|---------|-------|---------|---------|----------|----------------------------|-----------------------|----------------------------|------------------------|
|      |        | 1      |         |       |         | 2       |          | 3                          | 4                     | 5                          | 6                      |
| 55   | 10     | 46     | +       | 56    | 10      | 47      | +        | 1069.2230                  | 58.4                  | -1                         | II                     |
| 54   | 13     | 41     | +       | 55    | 13      | 42      | +        | 1069.2701                  | 74.2                  | 2                          | II                     |
| 54   | 13     | 41     | -       | 55    | 13      | 42      | -        | 1069.2735                  | 80.3                  | -1                         | II                     |
| 55   | 9      | 47     | -       | 56    | 9       | 48      | -        | 1069.3752                  | 43.5                  | -4                         | II                     |
| 55   | 9      | 47     | +       | 56    | 9       | 48      | +        | 1069.3752                  | 43.5                  | -12                        | II                     |
| 56   | 5      | 51     | -       | 57    | 5       | 52      | -        | 1069.4529                  | 17.3                  | -20                        | II                     |
| 56   | 5      | 51     | +       | 57    | 5       | 52      | +        | 1069.4529                  | 17.3                  | 17                         | II                     |
| 55   | 8      | 48     | +       | 56    | 8       | 49      | +        | 1069.5344                  | 49.4                  | -4                         | II                     |
| 55   | 8      | 48     | -       | 56    | 8       | 49      | -        | 1069.5344                  | 49.4                  | -4                         | II                     |
| 54   | 12     | 42     | +       | 55    | 12      | 43      | +        | 1069.5669                  | 76.3                  | 0                          | II                     |
| 54   | 12     | 42     | -       | 55    | 12      | 43      | -        | 1069.5693                  | 76.6                  | -3                         | II                     |
| 57   | 5      | 53     | +       | 58    | 5       | 54      | +        | 1069.6277                  | 64.7                  | 5                          | II                     |
| 57   | 5      | 53     | -       | 58    | 5       | 54      | -        | 1069.6277                  | 64.7                  | -9                         | II                     |
| 58   | 3      | 55     | +       | 59    | 3       | 56      | +        | 1069.6690                  | 63.4                  | 3                          | II                     |
| 58   | 3      | 55     | -       | 59    | 3       | 56      | -        | 1069.6690                  | 63.4                  | -5                         | II                     |
| 53   | 14     | 40     | +       | 54    | 14      | 41      | +        | 1069.7205                  | 81.2                  | 5                          | II                     |
| 53   | 14     | 40     | -       | 54    | 14      | 41      | -        | 1069.7245                  | 74.0                  | -2                         | II                     |
| 59   | 3      | 57     | -       | 60    | 3       | 58      | -        | 1069.7298                  | 54.5                  | -7                         | II                     |
| 59   | 3      | 57     | +       | 60    | 3       | 58      | +        | 1069.7298                  | 54.5                  | -3                         | II                     |
| 54   | 7      | 47     | -       | 55    | 7       | 48      | -        | 1069.7348                  | 64.3                  | 2                          | II                     |
| 54   | 7      | 47     | +       | 55    | 7       | 48      | +        | 1069.7375                  | 63.1                  | 6                          | II                     |
| 66   | 4      | 62     | -       | 67    | 4       | 63      | -        | 1069.7658                  | 91.1                  | -2                         | II                     |
| 60   | 1      | 59     | +       | 61    | 1       | 60      | +        | 1069.8089                  | 51.8                  | -2                         | II                     |
| 60   | 1      | 59     | -       | 61    | 1       | 60      | -        | 1069.8089                  | 51.8                  | -4                         | II                     |
| 54   | 11     | 43     | +       | 55    | 11      | 44      | +        | 1069.8217                  | 67.7                  | 3                          | II                     |
| 55   | 7      | 49     | +       | 56    | 7       | 50      | +        | 1069.8396                  | 53.0                  | -4                         | II                     |
| 55   | 7      | 49     | -       | 56    | 7       | 50      | -        | 1069.8396                  | 53.0                  | -12                        | II                     |
| 61   | 1      | 61     | -       | 62    | 1       | 62      | -        | 1069.9109                  | 90.6                  | 1                          | I                      |
| 61   | 1      | 61     | +       | 62    | 1       | 62      | +        | 1069.9109                  | 90.6                  | 4                          | I                      |
| 54   | 6      | 48     | +       | 55    | 6       | 49      | +        | 1069.9679                  | 59.8                  | -1                         | II                     |
| 54   | 10     | 44     | +       | 55    | 10      | 45      | +        | 1070.0223                  | 42.2                  | 0                          | II                     |
| 54   | 10     | 44     | -       | 55    | 10      | 45      | -        | 1070.0223                  | 42.2                  | -7                         | II                     |
| 54   | 8      | 46     | -       | 55    | 8       | 47      | -        | 1070.0288                  | 58.0                  | 3                          | II                     |
| 54   | 8      | 46     | +       | 55    | 8       | 47      | +        | 1070.0319                  | 58.6                  | 4                          | II                     |
| 53   | 13     | 41     | +       | 54    | 13      | 42      | +        | 1070.0576                  | 73.5                  | 2                          | II                     |
| 65   | 2      | 64     | -       | 65    | 2       | 63      | -        | 1070.2203                  | 98.1                  | -9                         | II                     |
| 65   | 2      | 64     | +       | 65    | 2       | 63      | +        | 1070.2649                  | 89.4                  | 6                          | II                     |
| 67   | 3      | 65     | -       | 67    | 3       | 64      | -        | 1070.2806                  | 98.3                  | 17                         | II                     |
| 56   | 4      | 52     | +       | 57    | 4       | 53      | +        | 1070.3369                  | 57.9                  | 10                         | II                     |
| 56   | 4      | 52     | -       | 57    | 4       | 53      | -        | 1070.3369                  | 57.9                  | -7                         | II                     |
| 53   | 12     | 42     | +       | 54    | 12      | 43      | +        | 1070.3580                  | 74.6                  | 1                          | II                     |
| 53   | 12     | 42     | -       | 54    | 12      | 43      | -        | 1070.3604                  | 74.5                  | -3                         | II                     |
| 55   | 6      | 50     | -       | 56    | 6       | 51      | -        | 1070.3848                  | 62.9                  | -7                         | II                     |
| 57   | 4      | 54     | -       | 58    | 4       | 55      | -        | 1070.4017                  | 36.1                  | -16                        | II                     |
| 57   | 4      | 54     | +       | 58    | 4       | 55      | +        | 1070.4017                  | 36.1                  | -8                         | II                     |
| 58   | 2      | 56     | +       | 59    | 2       | 57      | +        | 1070.4610                  | 94.8                  | -3                         | I                      |
| 58   | 2      | 56     | -       | 59    | 2       | 57      | -        | 1070.4610                  | 94.8                  | -7                         | I                      |
| 52   | 14     | 38     | +       | 53    | 14      | 39      | +        | 1070.5018                  | 76.8                  | 6                          | II                     |
| 52   | 14     | 38     | -       | 53    | 14      | 39      | -        | 1070.5061                  | 78.3                  | 1                          | II                     |
| 59   | 2      | 58     | +       | 60    | 2       | 59      | +        | 1070.5387                  | 46.8                  | -1                         | II                     |
| 59   | 2      | 58     | -       | 60    | 2       | 59      | -        | 1070.5387                  | 46.8                  | -3                         | II                     |
| 53   | 11     | 43     | +       | 54    | 11      | 44      | +        | 1070.6174                  | 66.2                  | 3                          | II                     |
| 60   | 0      | 60     | +       | 61    | 0       | 61      | +        | 1070.6386                  | 93.8                  | -1                         | I                      |
| 60   | 0      | 60     | -       | 61    | 0       | 61      | -        | 1070.6386                  | 93.8                  | -3                         | I                      |
| 53   | 10     | 44     | +       | 54    | 10      | 45      | +        | 1070.8289                  | 91.0                  | 3                          | II                     |
| 53   | 10     | 44     | -       | 54    | 10      | 45      | -        | 1070.8289                  | 91.0                  | -5                         | II                     |
| 52   | 13     | 39     | +       | 53    | 13      | 40      | +        | 1070.8412                  | 60.5                  | -1                         | II                     |
| 54   | 5      | 49     | -       | 55    | 5       | 50      | -        | 1070.8733                  | 52.2                  | -5                         | II                     |
| 54   | 5      | 49     | +       | 55    | 5       | 50      | +        | 1070.8733                  | 52.2                  | 35                         | II                     |
| 51   | 15     | 37     | +       | 52    | 15      | 38      | +        | 1070.9037                  | 79.7                  | 10                         | II                     |
| 53   | 9      | 45     | +       | 54    | 9       | 46      | +        | 1070.9898                  | 41.9                  | 0                          | II                     |
| 53   | 9      | 45     | -       | 54    | 9       | 46      | -        | 1070.9898                  | 41.9                  | 1                          | II                     |
| 55   | 5      | 51     | +       | 56    | 5       | 52      | +        | 1071.0952                  | 59.5                  | 8                          | II                     |
| 55   | 5      | 51     | -       | 56    | 5       | 52      | -        | 1071.0952                  | 59.5                  | -5                         | II                     |
| 56   | 3      | 53     | +       | 57    | 3       | 54      | +        | 1071.1310                  | 13.7                  | 7                          | II                     |
| 56   | 3      | 53     | -       | 57    | 3       | 54      | -        | 1071.1326                  | 16.4                  | 16                         | II                     |
| 53   | 8      | 46     | +       | 54    | 8       | 47      | +        | 1071.1356                  | 31.5                  | -2                         | II                     |
| 53   | 8      | 46     | -       | 54    | 8       | 47      | -        | 1071.1356                  | 31.5                  | 0                          | II                     |
| 52   | 12     | 40     | +       | 53    | 12      | 41      | +        | 1071.1453                  | 71.1                  | 0                          | II                     |
| 52   | 12     | 40     | -       | 53    | 12      | 41      | -        | 1071.1479                  | 69.2                  | -2                         | II                     |
| 57   | 3      | 55     | +       | 58    | 3       | 56      | +        | 1071.1894                  | 48.4                  | -6                         | II                     |
| 57   | 3      | 55     | -       | 58    | 3       | 56      | -        | 1071.1894                  | 48.4                  | -9                         | II                     |

| $N'$ | $K'_a$ | $K'_c$ | $J'^a)$ | $N''$ | $K''_a$ | $K''_c$ | $J''^b)$ | $\nu$ , exp. <sup>c)</sup> | Transm. <sup>d)</sup> | $\delta_\nu$ <sup>e)</sup> | Spectrum <sup>f)</sup> |
|------|--------|--------|---------|-------|---------|---------|----------|----------------------------|-----------------------|----------------------------|------------------------|
|      |        | 1      |         |       |         | 2       |          | 3                          | 4                     | 5                          | 6                      |
| 58   | 1      | 57     | —       | 59    | 1       | 58      | —        | 1071.2661                  | 33.8                  | 0                          | II                     |
| 58   | 1      | 57     | +       | 59    | 1       | 58      | +        | 1071.2661                  | 33.8                  | 2                          | II                     |
| 51   | 14     | 38     | +       | 52    | 14      | 39      | +        | 1071.2795                  | 75.2                  | 5                          | II                     |
| 51   | 14     | 38     | —       | 52    | 14      | 39      | —        | 1071.2840                  | 64.7                  | 1                          | II                     |
| 59   | 1      | 59     | +       | 60    | 1       | 60      | +        | 1071.3643                  | 92.1                  | 3                          | I                      |
| 59   | 1      | 59     | —       | 60    | 1       | 60      | —        | 1071.3643                  | 92.1                  | 0                          | I                      |
| 53   | 7      | 47     | —       | 54    | 7       | 48      | —        | 1071.3895                  | 23.1                  | -11                        | II                     |
| 53   | 7      | 47     | +       | 54    | 7       | 48      | +        | 1071.3895                  | 23.1                  | -7                         | II                     |
| 52   | 11     | 41     | +       | 53    | 11      | 42      | +        | 1071.4088                  | 63.0                  | 2                          | II                     |
| 52   | 6      | 46     | +       | 53    | 6       | 47      | +        | 1071.4903                  | 84.6                  | -22                        | I                      |
| 52   | 6      | 46     | —       | 53    | 6       | 47      | —        | 1071.4903                  | 84.6                  | -36                        | I                      |
| 51   | 13     | 39     | +       | 52    | 13      | 40      | +        | 1071.6225                  | 22.7                  | 6                          | II                     |
| 52   | 10     | 42     | +       | 53    | 10      | 43      | +        | 1071.6225                  | 22.7                  | -1                         | II                     |
| 52   | 10     | 42     | —       | 53    | 10      | 43      | —        | 1071.6225                  | 22.7                  | -9                         | II                     |
| 51   | 13     | 39     | —       | 52    | 13      | 40      | —        | 1071.6257                  | 69.2                  | -1                         | II                     |
| 50   | 15     | 35     | +       | 51    | 15      | 36      | +        | 1071.6757                  | 78.3                  | 9                          | II                     |
| 50   | 15     | 35     | —       | 51    | 15      | 36      | —        | 1071.6816                  | 77.2                  | 5                          | II                     |
| 52   | 8      | 44     | —       | 53    | 8       | 45      | —        | 1071.7294                  | 95.6                  | 2                          | I                      |
| 52   | 8      | 44     | +       | 53    | 8       | 45      | +        | 1071.7316                  | 95.4                  | -1                         | I                      |
| 52   | 9      | 43     | +       | 53    | 9       | 44      | +        | 1071.7623                  | 37.1                  | 0                          | II                     |
| 52   | 9      | 43     | —       | 53    | 9       | 44      | —        | 1071.7623                  | 37.1                  | 4                          | II                     |
| 54   | 4      | 50     | —       | 55    | 4       | 51      | —        | 1071.7825                  | 9.1                   | -26                        | II                     |
| 54   | 4      | 50     | +       | 55    | 4       | 51      | +        | 1071.7825                  | 9.1                   | -8                         | II                     |
| 65   | 3      | 63     | —       | 65    | 3       | 62      | —        | 1071.7978                  | 93.7                  | -29                        | II                     |
| 55   | 4      | 52     | —       | 56    | 4       | 53      | —        | 1071.8601                  | 44.5                  | -2                         | II                     |
| 55   | 4      | 52     | +       | 56    | 4       | 53      | +        | 1071.8601                  | 44.5                  | 5                          | II                     |
| 53   | 6      | 48     | +       | 54    | 6       | 49      | +        | 1071.8746                  | 94.1                  | -2                         | I                      |
| 53   | 6      | 48     | —       | 54    | 6       | 49      | —        | 1071.8746                  | 94.1                  | -14                        | I                      |
| 56   | 2      | 54     | —       | 57    | 2       | 55      | —        | 1071.9141                  | 84.6                  | -19                        | II                     |
| 51   | 12     | 40     | +       | 52    | 12      | 41      | +        | 1071.9291                  | 68.1                  | 0                          | II                     |
| 51   | 12     | 40     | —       | 52    | 12      | 41      | —        | 1071.9318                  | 68.3                  | -2                         | II                     |
| 57   | 2      | 56     | +       | 58    | 2       | 57      | +        | 1071.9901                  | 85.2                  | -2                         | II                     |
| 57   | 2      | 56     | —       | 58    | 2       | 57      | —        | 1071.9901                  | 85.2                  | -3                         | II                     |
| 50   | 14     | 36     | +       | 51    | 14      | 37      | +        | 1072.0538                  | 73.4                  | 4                          | II                     |
| 50   | 14     | 36     | —       | 51    | 14      | 37      | —        | 1072.0589                  | 61.2                  | 3                          | II                     |
| 58   | 0      | 58     | —       | 59    | 0       | 59      | —        | 1072.0869                  | 92.0                  | 0                          | I                      |
| 58   | 0      | 58     | +       | 59    | 0       | 59      | +        | 1072.0869                  | 92.0                  | 1                          | I                      |
| 43   | 24     | 20     | +       | 44    | 24      | 21      | +        | 1072.1498                  | 88.3                  | -3                         | II                     |
| 43   | 24     | 20     | —       | 44    | 24      | 21      | —        | 1072.1717                  | 95.0                  | -5                         | II                     |
| 51   | 11     | 41     | +       | 52    | 11      | 42      | +        | 1072.1966                  | 60.4                  | 1                          | II                     |
| 51   | 11     | 41     | —       | 52    | 11      | 42      | —        | 1072.1982                  | 60.4                  | -3                         | II                     |
| 62   | 7      | 55     | —       | 62    | 9       | 54      | —        | 1072.2700                  | 89.9                  | 6                          | II                     |
| 52   | 5      | 47     | +       | 53    | 5       | 48      | +        | 1072.2742                  | 39.6                  | -9                         | II                     |
| 52   | 5      | 47     | —       | 53    | 5       | 48      | —        | 1072.2787                  | 51.1                  | -4                         | II                     |
| 50   | 13     | 37     | +       | 51    | 13      | 38      | +        | 1072.3992                  | 68.7                  | 2                          | II                     |
| 50   | 13     | 37     | —       | 51    | 13      | 38      | —        | 1072.4030                  | 69.9                  | -1                         | II                     |
| 51   | 10     | 42     | —       | 52    | 10      | 43      | —        | 1072.4186                  | 94.0                  | -8                         | I                      |
| 51   | 10     | 42     | +       | 52    | 10      | 43      | +        | 1072.4186                  | 94.0                  | 2                          | I                      |
| 49   | 15     | 35     | +       | 50    | 15      | 36      | +        | 1072.4444                  | 75.5                  | 7                          | II                     |
| 49   | 15     | 35     | —       | 50    | 15      | 36      | —        | 1072.4502                  | 75.3                  | 0                          | II                     |
| 53   | 5      | 49     | +       | 54    | 5       | 50      | +        | 1072.5518                  | 94.6                  | -11                        | I                      |
| 54   | 3      | 51     | —       | 55    | 3       | 52      | —        | 1072.5810                  | 47.7                  | -18                        | II                     |
| 54   | 3      | 51     | +       | 55    | 3       | 52      | +        | 1072.5810                  | 47.7                  | 6                          | II                     |
| 51   | 9      | 43     | —       | 52    | 9       | 44      | —        | 1072.5898                  | 91.6                  | 2                          | I                      |
| 51   | 9      | 43     | +       | 52    | 9       | 44      | +        | 1072.5898                  | 91.6                  | 2                          | I                      |
| 64   | 2      | 62     | +       | 64    | 4       | 61      | +        | 1072.6020                  | 91.9                  | 3                          | II                     |
| 55   | 3      | 53     | +       | 56    | 3       | 54      | +        | 1072.6388                  | 92.7                  | -2                         | I                      |
| 55   | 3      | 53     | —       | 56    | 3       | 54      | —        | 1072.6388                  | 92.7                  | -5                         | I                      |
| 50   | 12     | 38     | —       | 51    | 12      | 39      | —        | 1072.7120                  | 88.9                  | -3                         | I                      |
| 56   | 1      | 55     | +       | 57    | 1       | 56      | +        | 1072.7120                  | 88.9                  | 1                          | I                      |
| 56   | 1      | 55     | —       | 57    | 1       | 56      | —        | 1072.7120                  | 88.9                  | 0                          | I                      |
| 51   | 8      | 44     | —       | 52    | 8       | 45      | —        | 1072.7299                  | 91.8                  | 1                          | I                      |
| 51   | 8      | 44     | +       | 52    | 8       | 45      | +        | 1072.7299                  | 91.8                  | -3                         | I                      |
| 57   | 1      | 57     | +       | 58    | 1       | 58      | +        | 1072.8073                  | 80.4                  | 7                          | I                      |
| 57   | 1      | 57     | —       | 58    | 1       | 58      | —        | 1072.8073                  | 80.4                  | 4                          | I                      |
| 43   | 23     | 21     | —       | 44    | 23      | 22      | —        | 1072.8195                  | 65.1                  | -5                         | II                     |
| 49   | 14     | 36     | +       | 50    | 14      | 37      | +        | 1072.8249                  | 70.7                  | 3                          | II                     |
| 49   | 14     | 36     | —       | 50    | 14      | 37      | —        | 1072.8300                  | 69.9                  | 1                          | II                     |
| 42   | 24     | 18     | —       | 43    | 24      | 19      | —        | 1072.9041                  | 91.0                  | -5                         | II                     |
| 51   | 7      | 45     | —       | 52    | 7       | 46      | —        | 1072.9419                  | 90.7                  | -2                         | I                      |
| 51   | 7      | 45     | +       | 52    | 7       | 46      | +        | 1072.9419                  | 90.7                  | -2                         | I                      |
| 50   | 11     | 39     | —       | 51    | 11      | 40      | —        | 1072.9818                  | 40.2                  | -8                         | II                     |

| $N'$ | $K'_a$ | $K'_c$ | $J'^a)$ | $N''$ | $K''_a$ | $K''_c$ | $J''^b)$ | $\nu$ , exp. <sup>c)</sup> | Transm. <sup>d)</sup> | $\delta_\nu$ <sup>e)</sup> | Spectrum <sup>f)</sup> |
|------|--------|--------|---------|-------|---------|---------|----------|----------------------------|-----------------------|----------------------------|------------------------|
|      |        | 1      |         |       |         | 2       |          | 3                          | 4                     | 5                          | 6                      |
| 50   | 6      | 44     | +       | 51    | 6       | 45      | +        | 1073.0529                  | 89.7                  | 0                          | I                      |
| 50   | 6      | 44     | -       | 51    | 6       | 45      | -        | 1073.0529                  | 89.7                  | -2                         | I                      |
| 50   | 7      | 43     | -       | 51    | 7       | 44      | -        | 1073.1510                  | 46.9                  | 2                          | II                     |
| 50   | 7      | 43     | +       | 51    | 7       | 44      | +        | 1073.1550                  | 43.7                  | 4                          | II                     |
| 49   | 13     | 37     | +       | 50    | 13      | 38      | +        | 1073.1729                  | 51.9                  | 1                          | II                     |
| 49   | 13     | 37     | -       | 50    | 13      | 38      | -        | 1073.1765                  | 53.5                  | -4                         | II                     |
| 50   | 10     | 40     | -       | 51    | 10      | 41      | -        | 1073.2062                  | 37.4                  | -7                         | II                     |
| 50   | 10     | 40     | +       | 51    | 10      | 41      | +        | 1073.2062                  | 37.4                  | 3                          | II                     |
| 48   | 15     | 33     | +       | 49    | 15      | 34      | +        | 1073.2100                  | 70.0                  | 6                          | II                     |
| 52   | 4      | 48     | +       | 53    | 4       | 49      | +        | 1073.2132                  | 44.6                  | -11                        | II                     |
| 52   | 4      | 48     | -       | 53    | 4       | 49      | -        | 1073.2162                  | 31.8                  | -1                         | II                     |
| 48   | 15     | 33     | -       | 49    | 15      | 34      | -        | 1073.2162                  | 31.8                  | 2                          | II                     |
| 53   | 4      | 50     | +       | 54    | 4       | 51      | +        | 1073.3051                  | 42.3                  | -8                         | II                     |
| 53   | 4      | 50     | -       | 54    | 4       | 51      | -        | 1073.3066                  | 42.4                  | 0                          | II                     |
| 63   | 3      | 61     | +       | 63    | 3       | 60      | +        | 1073.3592                  | 91.4                  | 4                          | I                      |
| 54   | 2      | 52     | -       | 55    | 2       | 53      | -        | 1073.3592                  | 91.4                  | -3                         | I                      |
| 54   | 2      | 52     | +       | 55    | 2       | 53      | +        | 1073.3592                  | 91.4                  | 0                          | I                      |
| 50   | 9      | 41     | +       | 51    | 9       | 42      | +        | 1073.3646                  | 89.9                  | -30                        | I                      |
| 51   | 6      | 46     | +       | 52    | 6       | 47      | +        | 1073.3646                  | 89.9                  | -5                         | I                      |
| 50   | 9      | 41     | -       | 51    | 9       | 42      | -        | 1073.3646                  | 89.9                  | -29                        | I                      |
| 51   | 6      | 46     | -       | 52    | 6       | 47      | -        | 1073.3646                  | 89.9                  | -15                        | I                      |
| 50   | 8      | 42     | -       | 51    | 8       | 43      | -        | 1073.3958                  | 93.9                  | 18                         | I                      |
| 50   | 8      | 42     | +       | 51    | 8       | 43      | +        | 1073.3958                  | 93.9                  | -2                         | I                      |
| 55   | 2      | 54     | +       | 56    | 2       | 55      | +        | 1073.4309                  | 90.8                  | 1                          | I                      |
| 55   | 2      | 54     | -       | 56    | 2       | 55      | -        | 1073.4309                  | 90.8                  | 0                          | I                      |
| 49   | 12     | 38     | +       | 50    | 12      | 39      | +        | 1073.4859                  | 57.9                  | -1                         | II                     |
| 49   | 12     | 38     | -       | 50    | 12      | 39      | -        | 1073.4888                  | 50.6                  | -3                         | II                     |
| 56   | 0      | 56     | -       | 57    | 0       | 57      | -        | 1073.5241                  | 76.8                  | 1                          | I                      |
| 56   | 0      | 56     | +       | 57    | 0       | 57      | +        | 1073.5241                  | 76.8                  | 2                          | I                      |
| 42   | 23     | 19     | +       | 43    | 23      | 20      | +        | 1073.5327                  | 90.7                  | -3                         | II                     |
| 47   | 16     | 32     | -       | 48    | 16      | 33      | -        | 1073.5639                  | 3.7                   | 1                          | II                     |
| 48   | 14     | 34     | +       | 49    | 14      | 35      | +        | 1073.5925                  | 61.7                  | 1                          | II                     |
| 48   | 14     | 34     | -       | 49    | 14      | 35      | -        | 1073.5979                  | 68.4                  | 0                          | II                     |
| 41   | 24     | 18     | +       | 42    | 24      | 19      | +        | 1073.6100                  | 85.2                  | -5                         | II                     |
| 64   | 7      | 57     | -       | 65    | 7       | 58      | -        | 1073.6150                  | 87.4                  | -2                         | II                     |
| 50   | 5      | 45     | +       | 51    | 5       | 46      | +        | 1073.6768                  | 26.6                  | -6                         | II                     |
| 50   | 5      | 45     | -       | 51    | 5       | 46      | -        | 1073.6805                  | 29.9                  | -5                         | II                     |
| 39   | 26     | 14     | -       | 40    | 26      | 15      | -        | 1073.6926                  | 82.3                  | -1                         | II                     |
| 49   | 11     | 39     | +       | 50    | 11      | 40      | +        | 1073.7610                  | 53.2                  | 1                          | II                     |
| 49   | 11     | 39     | -       | 50    | 11      | 40      | -        | 1073.7628                  | 53.3                  | -2                         | II                     |
| 33   | 31     | 3      | -       | 34    | 31      | 4       | -        | 1073.9221                  | 90.3                  | -3                         | II                     |
| 48   | 13     | 35     | +       | 49    | 13      | 36      | +        | 1073.9430                  | 59.0                  | 0                          | II                     |
| 48   | 13     | 35     | -       | 49    | 13      | 36      | -        | 1073.9472                  | 60.5                  | -1                         | II                     |
| 47   | 15     | 33     | +       | 48    | 15      | 34      | +        | 1073.9724                  | 68.6                  | 6                          | II                     |
| 47   | 15     | 33     | -       | 48    | 15      | 34      | -        | 1073.9789                  | 68.7                  | 3                          | II                     |
| 49   | 10     | 40     | -       | 50    | 10      | 41      | -        | 1073.9928                  | 35.8                  | -8                         | II                     |
| 49   | 10     | 40     | +       | 50    | 10      | 41      | +        | 1073.9928                  | 35.8                  | 4                          | II                     |
| 51   | 5      | 47     | +       | 52    | 5       | 48      | +        | 1074.0053                  | 91.2                  | 16                         | I                      |
| 51   | 5      | 47     | -       | 52    | 5       | 48      | -        | 1074.0053                  | 91.2                  | 5                          | I                      |
| 52   | 3      | 49     | -       | 53    | 3       | 50      | -        | 1074.0181                  | 92.7                  | -14                        | I                      |
| 52   | 3      | 49     | +       | 53    | 3       | 50      | +        | 1074.0181                  | 92.7                  | -7                         | I                      |
| 53   | 3      | 51     | +       | 54    | 3       | 52      | +        | 1074.0770                  | 88.5                  | -1                         | I                      |
| 53   | 3      | 51     | -       | 54    | 3       | 52      | -        | 1074.0770                  | 88.5                  | -3                         | I                      |
| 54   | 1      | 53     | -       | 55    | 1       | 54      | -        | 1074.1470                  | 89.7                  | 0                          | II                     |
| 54   | 1      | 53     | +       | 55    | 1       | 54      | +        | 1074.1470                  | 89.7                  | 0                          | II                     |
| 49   | 9      | 41     | +       | 50    | 9       | 42      | +        | 1074.1750                  | 76.4                  | 8                          | I                      |
| 55   | 1      | 55     | +       | 56    | 1       | 56      | +        | 1074.2383                  | 86.5                  | 0                          | II                     |
| 55   | 1      | 55     | -       | 56    | 1       | 56      | -        | 1074.2383                  | 86.5                  | -2                         | II                     |
| 48   | 12     | 36     | +       | 49    | 12      | 37      | +        | 1074.2591                  | 57.8                  | 0                          | II                     |
| 48   | 12     | 36     | -       | 49    | 12      | 37      | -        | 1074.2623                  | 56.5                  | -1                         | II                     |
| 41   | 23     | 19     | -       | 42    | 23      | 20      | -        | 1074.2843                  | 76.0                  | -12                        | II                     |
| 49   | 8      | 42     | +       | 50    | 8       | 43      | +        | 1074.3152                  | 88.1                  | 0                          | I                      |
| 49   | 8      | 42     | -       | 50    | 8       | 43      | -        | 1074.3152                  | 88.1                  | 1                          | I                      |
| 47   | 14     | 34     | +       | 48    | 14      | 35      | +        | 1074.3572                  | 64.8                  | 2                          | II                     |
| 47   | 14     | 34     | -       | 48    | 14      | 35      | -        | 1074.3626                  | 64.4                  | 1                          | II                     |
| 39   | 25     | 15     | +       | 40    | 25      | 16      | +        | 1074.3763                  | 80.5                  | 9                          | II                     |
| 64   | 3      | 61     | +       | 64    | 5       | 60      | +        | 1074.3895                  | 71.8                  | -1                         | II                     |
| 10   | 4      | 6      | +       | 11    | 6       | 5       | +        | 1074.4593                  | 94.0                  | 3                          | I                      |
| 49   | 7      | 43     | -       | 50    | 7       | 44      | -        | 1074.4939                  | 85.7                  | -2                         | I                      |
| 49   | 7      | 43     | +       | 50    | 7       | 44      | +        | 1074.4939                  | 85.7                  | -5                         | I                      |
| 48   | 11     | 37     | +       | 49    | 11      | 38      | +        | 1074.5381                  | 15.3                  | 5                          | II                     |
| 50   | 4      | 46     | +       | 51    | 4       | 47      | +        | 1074.6265                  | 37.3                  | -9                         | II                     |

| $N'$ | $K'_a$ | $K'_c$ | $J'^a)$ | $N''$ | $K''_a$ | $K''_c$ | $J''^b)$ | $\nu$ , exp. <sup>c)</sup> | Transm. <sup>d)</sup> | $\delta_\nu$ <sup>e)</sup> | Spectrum <sup>f)</sup> |
|------|--------|--------|---------|-------|---------|---------|----------|----------------------------|-----------------------|----------------------------|------------------------|
|      |        | 1      |         |       |         | 2       |          | 3                          | 4                     | 5                          | 6                      |
| 50   | 4      | 46     | —       | 51    | 4       | 47      | —        | 1074.6299                  | 21.5                  | 3                          | II                     |
| 48   | 6      | 42     | —       | 49    | 6       | 43      | —        | 1074.6465                  | 89.2                  | 2                          | I                      |
| 48   | 6      | 42     | +       | 49    | 6       | 43      | +        | 1074.6465                  | 89.2                  | -5                         | I                      |
| 59   | 2      | 58     | —       | 59    | 2       | 57      | —        | 1074.6761                  | 52.2                  | 0                          | II                     |
| 47   | 13     | 35     | +       | 48    | 13      | 36      | +        | 1074.7100                  | 57.1                  | 1                          | II                     |
| 47   | 13     | 35     | —       | 48    | 13      | 36      | —        | 1074.7143                  | 56.7                  | 0                          | II                     |
| 59   | 2      | 58     | +       | 59    | 2       | 57      | +        | 1074.7201                  | 88.5                  | -5                         | II                     |
| 46   | 15     | 31     | —       | 47    | 15      | 32      | —        | 1074.7385                  | 64.9                  | 4                          | II                     |
| 51   | 4      | 48     | +       | 52    | 4       | 49      | +        | 1074.7411                  | 91.5                  | -6                         | I                      |
| 51   | 4      | 48     | —       | 52    | 4       | 49      | —        | 1074.7411                  | 91.5                  | -12                        | I                      |
| 42   | 21     | 21     | +       | 43    | 21      | 22      | +        | 1074.7524                  | 86.5                  | -6                         | II                     |
| 48   | 10     | 38     | +       | 49    | 10      | 39      | +        | 1074.7733                  | 31.1                  | 5                          | II                     |
| 48   | 10     | 38     | —       | 49    | 10      | 39      | —        | 1074.7733                  | 31.1                  | -7                         | II                     |
| 52   | 2      | 50     | +       | 53    | 2       | 51      | +        | 1074.7918                  | 89.8                  | 0                          | I                      |
| 52   | 2      | 50     | —       | 53    | 2       | 51      | —        | 1074.7918                  | 89.8                  | -2                         | I                      |
| 48   | 7      | 41     | —       | 49    | 7       | 42      | —        | 1074.8519                  | 29.1                  | -3                         | II                     |
| 48   | 7      | 41     | +       | 49    | 7       | 42      | +        | 1074.8560                  | 6.7                   | 1                          | II                     |
| 49   | 6      | 44     | +       | 50    | 6       | 45      | +        | 1074.8561                  | 83.1                  | -1                         | I                      |
| 49   | 6      | 44     | —       | 50    | 6       | 45      | —        | 1074.8561                  | 83.1                  | -7                         | I                      |
| 53   | 2      | 52     | —       | 54    | 2       | 53      | —        | 1074.8606                  | 87.3                  | 1                          | I                      |
| 53   | 2      | 52     | +       | 54    | 2       | 53      | +        | 1074.8606                  | 87.3                  | 1                          | I                      |
| 61   | 3      | 59     | +       | 61    | 3       | 58      | +        | 1074.8656                  | 74.0                  | 10                         | II                     |
| 41   | 22     | 20     | +       | 42    | 22      | 21      | +        | 1074.8887                  | 74.8                  | -6                         | I                      |
| 41   | 22     | 20     | —       | 42    | 22      | 21      | —        | 1074.9085                  | 85.6                  | -7                         | II                     |
| 48   | 9      | 39     | —       | 49    | 9       | 40      | —        | 1074.9503                  | 84.6                  | -18                        | I                      |
| 48   | 9      | 39     | +       | 49    | 9       | 40      | +        | 1074.9503                  | 84.6                  | -17                        | I                      |
| 54   | 0      | 54     | —       | 55    | 0       | 55      | —        | 1074.9503                  | 84.6                  | 2                          | I                      |
| 54   | 0      | 54     | +       | 55    | 0       | 55      | +        | 1074.9503                  | 84.6                  | 3                          | I                      |
| 68   | 3      | 65     | —       | 67    | 5       | 62      | —        | 1074.9503                  | 84.6                  | 1                          | I                      |
| 48   | 8      | 40     | —       | 49    | 8       | 41      | —        | 1075.0254                  | 83.6                  | 5                          | I                      |
| 48   | 8      | 40     | +       | 49    | 8       | 41      | +        | 1075.0254                  | 83.6                  | -10                        | I                      |
| 47   | 12     | 36     | +       | 48    | 12      | 37      | +        | 1075.0288                  | 16.6                  | 1                          | II                     |
| 47   | 12     | 36     | —       | 48    | 12      | 37      | —        | 1075.0320                  | 50.3                  | -2                         | II                     |
| 45   | 16     | 30     | —       | 46    | 16      | 31      | —        | 1075.0764                  | 70.2                  | 6                          | II                     |
| 48   | 5      | 43     | +       | 49    | 5       | 44      | +        | 1075.0899                  | 90.3                  | -3                         | I                      |
| 48   | 5      | 43     | —       | 49    | 5       | 44      | —        | 1075.0930                  | 90.7                  | -1                         | I                      |
| 46   | 14     | 32     | +       | 47    | 14      | 33      | +        | 1075.1185                  | 58.4                  | 3                          | II                     |
| 46   | 14     | 32     | —       | 47    | 14      | 33      | —        | 1075.1239                  | 61.0                  | -1                         | II                     |
| 16   | 5      | 11     | +       | 16    | 7       | 10      | +        | 1075.1594                  | 82.2                  | -2                         | II                     |
| 47   | 11     | 37     | +       | 48    | 11      | 38      | +        | 1075.3105                  | 44.9                  | -1                         | II                     |
| 47   | 11     | 37     | —       | 48    | 11      | 38      | —        | 1075.3128                  | 46.7                  | -2                         | II                     |
| 50   | 3      | 47     | —       | 51    | 3       | 48      | —        | 1075.4466                  | 86.7                  | 9                          | I                      |
| 50   | 3      | 47     | +       | 51    | 3       | 48      | +        | 1075.4466                  | 86.7                  | 17                         | I                      |
| 49   | 5      | 45     | —       | 50    | 5       | 46      | —        | 1075.4490                  | 26.4                  | -2                         | II                     |
| 46   | 13     | 33     | +       | 47    | 13      | 34      | +        | 1075.4726                  | 26.0                  | -7                         | II                     |
| 46   | 13     | 33     | —       | 47    | 13      | 34      | —        | 1075.4785                  | 6.4                   | 5                          | II                     |
| 45   | 15     | 31     | +       | 46    | 15      | 32      | +        | 1075.4870                  | 41.2                  | 0                          | II                     |
| 41   | 21     | 21     | +       | 42    | 21      | 22      | +        | 1075.4870                  | 41.2                  | 0                          | II                     |
| 41   | 21     | 21     | —       | 42    | 21      | 22      | —        | 1075.5044                  | 85.7                  | -8                         | I                      |
| 51   | 3      | 49     | —       | 52    | 3       | 50      | —        | 1075.5044                  | 85.7                  | -2                         | I                      |
| 51   | 3      | 49     | +       | 52    | 3       | 50      | +        | 1075.5044                  | 85.7                  | 1                          | I                      |
| 47   | 10     | 38     | +       | 48    | 10      | 39      | +        | 1075.5506                  | 14.5                  | -3                         | II                     |
| 52   | 1      | 51     | —       | 53    | 1       | 52      | —        | 1075.5712                  | 87.1                  | 0                          | I                      |
| 52   | 1      | 51     | +       | 53    | 1       | 52      | +        | 1075.5712                  | 87.1                  | 0                          | I                      |
| 33   | 29     | 5      | —       | 34    | 29      | 6       | —        | 1075.6277                  | 54.3                  | -1                         | II                     |
| 53   | 1      | 53     | +       | 54    | 1       | 54      | +        | 1075.6592                  | 83.9                  | 2                          | I                      |
| 53   | 1      | 53     | —       | 54    | 1       | 54      | —        | 1075.6592                  | 83.9                  | 1                          | I                      |
| 47   | 9      | 39     | —       | 48    | 9       | 40      | —        | 1075.7437                  | 84.7                  | 1                          | I                      |
| 47   | 9      | 39     | +       | 48    | 9       | 40      | +        | 1075.7437                  | 84.7                  | 4                          | I                      |
| 35   | 27     | 9      | +       | 36    | 27      | 10      | +        | 1075.7665                  | 56.0                  | 1                          | II                     |
| 38   | 24     | 14     | +       | 39    | 24      | 15      | +        | 1075.7807                  | 91.6                  | 1                          | II                     |
| 46   | 12     | 34     | +       | 47    | 12      | 35      | +        | 1075.7948                  | 50.0                  | 0                          | II                     |
| 46   | 12     | 34     | —       | 47    | 12      | 35      | —        | 1075.7981                  | 44.8                  | -3                         | II                     |
| 38   | 24     | 14     | —       | 39    | 24      | 15      | —        | 1075.8066                  | 80.4                  | -5                         | II                     |
| 37   | 25     | 13     | +       | 38    | 25      | 14      | +        | 1075.8103                  | 94.8                  | 0                          | II                     |
| 44   | 16     | 28     | +       | 45    | 16      | 29      | +        | 1075.8188                  | 63.6                  | 6                          | II                     |
| 44   | 16     | 28     | —       | 45    | 16      | 29      | —        | 1075.8274                  | 67.3                  | 3                          | II                     |
| 45   | 14     | 32     | +       | 46    | 14      | 33      | +        | 1075.8762                  | 56.9                  | 1                          | II                     |
| 45   | 14     | 32     | —       | 46    | 14      | 33      | —        | 1075.8817                  | 25.6                  | -3                         | II                     |
| 47   | 8      | 40     | +       | 48    | 8       | 41      | +        | 1075.8895                  | 70.5                  | 5                          | I                      |
| 47   | 8      | 40     | —       | 48    | 8       | 41      | —        | 1075.8895                  | 70.5                  | 3                          | I                      |
| 48   | 4      | 44     | +       | 49    | 4       | 45      | +        | 1076.0206                  | 91.0                  | -7                         | I                      |



| $N'$ | $K'_a$ | $K'_c$ | $J'^a)$ | $N''$ | $K''_a$ | $K''_c$ | $J''^b)$ | $\nu$ , exp. <sup>c)</sup> | Transm. <sup>d)</sup> | $\delta_\nu$ <sup>e)</sup> | Spectrum <sup>f)</sup> |
|------|--------|--------|---------|-------|---------|---------|----------|----------------------------|-----------------------|----------------------------|------------------------|
|      |        | 1      |         |       |         | 2       |          | 3                          | 4                     | 5                          | 6                      |
| 48   | 4      | 44     | —       | 49    | 4       | 45      | —        | 1076.0240                  | 91.2                  | 1                          | I                      |
| 47   | 7      | 41     | +       | 48    | 7       | 42      | +        | 1076.0447                  | 86.0                  | -4                         | I                      |
| 47   | 7      | 41     | —       | 48    | 7       | 42      | —        | 1076.0447                  | 86.0                  | 1                          | I                      |
| 41   | 20     | 22     | +       | 42    | 20      | 23      | +        | 1076.0557                  | 62.6                  | -11                        | II                     |
| 46   | 11     | 35     | +       | 47    | 11      | 36      | +        | 1076.0799                  | 43.4                  | 0                          | II                     |
| 46   | 11     | 35     | —       | 47    | 11      | 36      | —        | 1076.0822                  | 42.6                  | -2                         | II                     |
| 49   | 4      | 46     | +       | 50    | 4       | 47      | +        | 1076.1667                  | 89.3                  | -4                         | I                      |
| 49   | 4      | 46     | —       | 50    | 4       | 47      | —        | 1076.1667                  | 89.3                  | -11                        | I                      |
| 50   | 2      | 48     | +       | 51    | 2       | 49      | +        | 1076.2133                  | 87.4                  | 1                          | I                      |
| 50   | 2      | 48     | —       | 51    | 2       | 49      | —        | 1076.2133                  | 87.4                  | -2                         | I                      |
| 45   | 13     | 33     | +       | 46    | 13      | 34      | +        | 1076.2335                  | 51.5                  | 1                          | II                     |
| 45   | 13     | 33     | —       | 46    | 13      | 34      | —        | 1076.2383                  | 45.9                  | 0                          | II                     |
| 44   | 15     | 29     | —       | 45    | 15      | 30      | —        | 1076.2473                  | 62.8                  | 1                          | II                     |
| 46   | 6      | 40     | —       | 47    | 6       | 41      | —        | 1076.2671                  | 88.8                  | -1                         | I                      |
| 46   | 6      | 40     | +       | 47    | 6       | 41      | +        | 1076.2700                  | 89.8                  | 2                          | I                      |
| 51   | 2      | 50     | +       | 52    | 2       | 51      | +        | 1076.2791                  | 84.0                  | 0                          | I                      |
| 51   | 2      | 50     | —       | 52    | 2       | 51      | —        | 1076.2791                  | 84.0                  | 0                          | I                      |
| 59   | 3      | 57     | —       | 59    | 3       | 56      | —        | 1076.3179                  | 95.7                  | -3                         | II                     |
| 46   | 10     | 36     | —       | 47    | 10      | 37      | —        | 1076.3247                  | 25.6                  | -6                         | II                     |
| 46   | 10     | 36     | +       | 47    | 10      | 37      | +        | 1076.3247                  | 25.6                  | 8                          | II                     |
| 47   | 6      | 42     | +       | 48    | 6       | 43      | +        | 1076.3489                  | 85.5                  | -1                         | I                      |
| 47   | 6      | 42     | —       | 48    | 6       | 43      | —        | 1076.3489                  | 85.5                  | -4                         | I                      |
| 52   | 0      | 52     | —       | 53    | 0       | 53      | —        | 1076.3653                  | 78.6                  | 1                          | I                      |
| 52   | 0      | 52     | +       | 53    | 0       | 53      | +        | 1076.3653                  | 78.6                  | 1                          | I                      |
| 33   | 28     | 6      | +       | 34    | 28      | 7       | +        | 1076.3915                  | 97.6                  | -2                         | II                     |
| 38   | 23     | 15     | +       | 39    | 23      | 16      | +        | 1076.4389                  | 90.9                  | 0                          | II                     |
| 46   | 9      | 37     | —       | 47    | 9       | 38      | —        | 1076.5176                  | 86.7                  | -1                         | I                      |
| 46   | 9      | 37     | +       | 47    | 9       | 38      | +        | 1076.5176                  | 86.7                  | 3                          | I                      |
| 46   | 5      | 41     | —       | 47    | 5       | 42      | —        | 1076.5283                  | 81.0                  | 1                          | I                      |
| 46   | 5      | 41     | +       | 47    | 5       | 42      | +        | 1076.5283                  | 81.0                  | 20                         | I                      |
| 46   | 7      | 39     | —       | 47    | 7       | 40      | —        | 1076.5283                  | 81.0                  | -8                         | I                      |
| 46   | 7      | 39     | +       | 47    | 7       | 40      | +        | 1076.5327                  | 90.0                  | 1                          | I                      |
| 45   | 12     | 34     | +       | 46    | 12      | 35      | +        | 1076.5583                  | 92.2                  | 8                          | I                      |
| 43   | 16     | 28     | +       | 44    | 16      | 29      | +        | 1076.5668                  | 64.4                  | 7                          | II                     |
| 43   | 16     | 28     | —       | 44    | 16      | 29      | —        | 1076.5755                  | 55.5                  | 2                          | II                     |
| 46   | 8      | 38     | +       | 47    | 8       | 39      | +        | 1076.6261                  | 86.8                  | -5                         | I                      |
| 46   | 8      | 38     | —       | 47    | 8       | 39      | —        | 1076.6261                  | 86.8                  | 5                          | I                      |
| 44   | 14     | 30     | +       | 45    | 14      | 31      | +        | 1076.6308                  | 53.2                  | 1                          | II                     |
| 44   | 14     | 30     | —       | 45    | 14      | 31      | —        | 1076.6369                  | 54.8                  | 0                          | II                     |
| 61   | 4      | 58     | +       | 61    | 4       | 57      | +        | 1076.7311                  | 92.4                  | -5                         | II                     |
| 45   | 11     | 35     | +       | 46    | 11      | 36      | +        | 1076.8455                  | 39.4                  | 0                          | II                     |
| 45   | 11     | 35     | —       | 46    | 11      | 36      | —        | 1076.8481                  | 36.1                  | -1                         | II                     |
| 48   | 3      | 45     | —       | 49    | 3       | 46      | —        | 1076.8587                  | 73.7                  | -5                         | I                      |
| 48   | 3      | 45     | +       | 49    | 3       | 46      | +        | 1076.8587                  | 73.7                  | 4                          | I                      |
| 47   | 5      | 43     | —       | 48    | 5       | 44      | —        | 1076.8886                  | 87.3                  | -1                         | II                     |
| 47   | 5      | 43     | +       | 48    | 5       | 44      | +        | 1076.8886                  | 87.3                  | 8                          | II                     |
| 49   | 3      | 47     | —       | 50    | 3       | 48      | —        | 1076.9205                  | 85.9                  | -4                         | I                      |
| 49   | 3      | 47     | +       | 50    | 3       | 48      | +        | 1076.9205                  | 85.9                  | -2                         | I                      |
| 39   | 21     | 19     | +       | 40    | 21      | 20      | +        | 1076.9460                  | 83.3                  | -3                         | II                     |
| 50   | 1      | 49     | +       | 51    | 1       | 50      | +        | 1076.9844                  | 84.1                  | 0                          | II                     |
| 50   | 1      | 49     | —       | 51    | 1       | 50      | —        | 1076.9844                  | 84.1                  | 0                          | II                     |
| 43   | 15     | 29     | +       | 44    | 15      | 30      | +        | 1076.9899                  | 30.7                  | 6                          | II                     |
| 44   | 13     | 31     | +       | 45    | 13      | 32      | +        | 1076.9899                  | 30.7                  | -3                         | II                     |
| 44   | 13     | 31     | —       | 45    | 13      | 32      | —        | 1076.9951                  | 44.2                  | -1                         | II                     |
| 43   | 15     | 29     | —       | 44    | 15      | 30      | —        | 1076.9971                  | 48.1                  | 1                          | II                     |
| 51   | 1      | 51     | —       | 52    | 1       | 52      | —        | 1077.0687                  | 81.1                  | 0                          | I                      |
| 51   | 1      | 51     | +       | 52    | 1       | 52      | +        | 1077.0687                  | 81.1                  | 1                          | I                      |
| 45   | 10     | 36     | —       | 46    | 10      | 37      | —        | 1077.0949                  | 89.9                  | -6                         | I                      |
| 45   | 10     | 36     | +       | 46    | 10      | 37      | +        | 1077.0949                  | 89.9                  | 10                         | I                      |
| 37   | 23     | 15     | +       | 38    | 23      | 16      | +        | 1077.1584                  | 88.6                  | 0                          | II                     |
| 37   | 23     | 15     | —       | 38    | 23      | 16      | —        | 1077.1837                  | 90.4                  | 0                          | II                     |
| 33   | 27     | 7      | —       | 34    | 27      | 8       | —        | 1077.2137                  | 90.4                  | 1                          | II                     |
| 36   | 24     | 12     | +       | 37    | 24      | 13      | +        | 1077.2137                  | 90.4                  | 1                          | II                     |
| 35   | 25     | 11     | +       | 36    | 25      | 12      | +        | 1077.2347                  | 93.2                  | 2                          | II                     |
| 36   | 24     | 12     | —       | 37    | 24      | 13      | —        | 1077.2423                  | 93.3                  | 1                          | II                     |
| 35   | 25     | 11     | —       | 36    | 25      | 12      | —        | 1077.2669                  | 87.1                  | 1                          | II                     |
| 45   | 9      | 37     | —       | 46    | 9       | 38      | —        | 1077.2968                  | 85.1                  | -1                         | I                      |
| 45   | 9      | 37     | +       | 46    | 9       | 38      | +        | 1077.2968                  | 85.1                  | 4                          | I                      |
| 42   | 16     | 26     | +       | 43    | 16      | 27      | +        | 1077.3112                  | 47.3                  | 4                          | II                     |
| 44   | 12     | 32     | +       | 45    | 12      | 33      | +        | 1077.3167                  | 88.8                  | 1                          | II                     |
| 44   | 12     | 32     | —       | 45    | 12      | 33      | —        | 1077.3204                  | 88.6                  | 0                          | I                      |
| 42   | 16     | 26     | —       | 43    | 16      | 27      | —        | 1077.3204                  | 88.6                  | 1                          | I                      |

| $N'$ | $K'_a$ | $K'_c$ | $J'^a)$ | $N''$ | $K''_a$ | $K''_c$ | $J''^b)$ | $\nu$ , exp. <sup>c)</sup> | Transm. <sup>d)</sup> | $\delta_\nu$ <sup>e)</sup> | Spectrum <sup>f)</sup> |
|------|--------|--------|---------|-------|---------|---------|----------|----------------------------|-----------------------|----------------------------|------------------------|
|      |        | 1      |         |       |         | 2       |          | 3                          | 4                     | 5                          | 6                      |
| 43   | 14     | 30     | +       | 44    | 14      | 31      | +        | 1077.3821                  | 47.7                  | 1                          | II                     |
| 43   | 14     | 30     | -       | 44    | 14      | 31      | -        | 1077.3885                  | 28.3                  | 0                          | II                     |
| 46   | 4      | 42     | +       | 47    | 4       | 43      | +        | 1077.3960                  | 88.8                  | -6                         | I                      |
| 46   | 4      | 42     | -       | 47    | 4       | 43      | -        | 1077.3995                  | 89.0                  | 0                          | I                      |
| 45   | 8      | 38     | -       | 46    | 8       | 39      | -        | 1077.4511                  | 67.5                  | 8                          | I                      |
| 45   | 8      | 38     | +       | 46    | 8       | 39      | +        | 1077.4511                  | 67.5                  | 4                          | I                      |
| 54   | 6      | 48     | +       | 54    | 8       | 47      | +        | 1077.5150                  | 83.7                  | 3                          | II                     |
| 47   | 4      | 44     | -       | 48    | 4       | 45      | -        | 1077.5823                  | 86.5                  | -10                        | I                      |
| 47   | 4      | 44     | +       | 48    | 4       | 45      | +        | 1077.5823                  | 86.5                  | -3                         | I                      |
| 45   | 7      | 39     | -       | 46    | 7       | 40      | -        | 1077.5915                  | 79.7                  | 3                          | I                      |
| 45   | 7      | 39     | +       | 46    | 7       | 40      | +        | 1077.5915                  | 79.7                  | -4                         | I                      |
| 44   | 11     | 33     | -       | 45    | 11      | 34      | -        | 1077.6106                  | 78.6                  | 2                          | I                      |
| 48   | 2      | 46     | -       | 49    | 2       | 47      | -        | 1077.6234                  | 82.6                  | -3                         | I                      |
| 48   | 2      | 46     | +       | 49    | 2       | 47      | +        | 1077.6234                  | 82.6                  | -1                         | I                      |
| 38   | 21     | 17     | +       | 39    | 21      | 18      | +        | 1077.6715                  | 83.3                  | -1                         | II                     |
| 49   | 2      | 48     | +       | 50    | 2       | 49      | +        | 1077.6870                  | 81.7                  | 1                          | I                      |
| 49   | 2      | 48     | -       | 50    | 2       | 49      | -        | 1077.6870                  | 81.7                  | 1                          | I                      |
| 42   | 15     | 27     | +       | 43    | 15      | 28      | +        | 1077.7355                  | 46.2                  | 0                          | II                     |
| 42   | 15     | 27     | -       | 43    | 15      | 28      | -        | 1077.7436                  | 25.4                  | -1                         | II                     |
| 43   | 13     | 31     | +       | 44    | 13      | 32      | +        | 1077.7436                  | 25.4                  | 1                          | II                     |
| 43   | 13     | 31     | -       | 44    | 13      | 32      | -        | 1077.7485                  | 94.9                  | -2                         | I                      |
| 66   | 6      | 60     | -       | 66    | 8       | 59      | -        | 1077.7593                  | 93.2                  | -2                         | II                     |
| 50   | 0      | 50     | +       | 51    | 0       | 51      | +        | 1077.7695                  | 79.3                  | 0                          | I                      |
| 50   | 0      | 50     | -       | 51    | 0       | 51      | -        | 1077.7695                  | 79.3                  | 0                          | I                      |
| 45   | 6      | 40     | -       | 46    | 6       | 41      | -        | 1077.8438                  | 80.1                  | -1                         | I                      |
| 45   | 6      | 40     | +       | 46    | 6       | 41      | +        | 1077.8438                  | 80.1                  | -2                         | I                      |
| 44   | 10     | 34     | +       | 45    | 10      | 35      | +        | 1077.8597                  | 24.0                  | 2                          | II                     |
| 44   | 10     | 34     | -       | 45    | 10      | 35      | -        | 1077.8609                  | 24.5                  | -3                         | II                     |
| 36   | 23     | 13     | -       | 37    | 23      | 14      | -        | 1077.9021                  | 76.6                  | 6                          | II                     |
| 44   | 6      | 38     | -       | 45    | 6       | 39      | -        | 1077.9089                  | 88.6                  | 0                          | I                      |
| 44   | 6      | 38     | +       | 45    | 6       | 39      | +        | 1077.9125                  | 88.1                  | 1                          | I                      |
| 35   | 24     | 12     | -       | 36    | 24      | 13      | -        | 1077.9560                  | 89.4                  | 2                          | II                     |
| 33   | 26     | 8      | -       | 34    | 26      | 9       | -        | 1077.9631                  | 94.0                  | 3                          | II                     |
| 44   | 5      | 39     | +       | 45    | 5       | 40      | +        | 1077.9942                  | 78.0                  | 2                          | I                      |
| 44   | 5      | 39     | -       | 45    | 5       | 40      | -        | 1077.9942                  | 78.0                  | -5                         | I                      |
| 41   | 16     | 26     | +       | 42    | 16      | 27      | +        | 1078.0529                  | 55.3                  | 5                          | II                     |
| 44   | 9      | 35     | -       | 45    | 9       | 36      | -        | 1078.0650                  | 83.5                  | -3                         | I                      |
| 44   | 9      | 35     | +       | 45    | 9       | 36      | +        | 1078.0650                  | 83.5                  | 3                          | I                      |
| 43   | 12     | 32     | +       | 44    | 12      | 33      | +        | 1078.0722                  | 93.1                  | 0                          | I                      |
| 43   | 12     | 32     | -       | 44    | 12      | 33      | -        | 1078.0761                  | 93.1                  | -1                         | II                     |
| 42   | 14     | 28     | +       | 43    | 14      | 29      | +        | 1078.1301                  | 46.3                  | 1                          | II                     |
| 42   | 14     | 28     | -       | 43    | 14      | 29      | -        | 1078.1367                  | 45.2                  | -1                         | II                     |
| 44   | 7      | 37     | -       | 45    | 7       | 38      | -        | 1078.1730                  | 88.8                  | 2                          | I                      |
| 44   | 8      | 36     | +       | 45    | 8       | 37      | +        | 1078.2000                  | 82.6                  | -4                         | II                     |
| 44   | 8      | 36     | -       | 45    | 8       | 37      | -        | 1078.2000                  | 82.6                  | 3                          | II                     |
| 38   | 20     | 18     | +       | 39    | 20      | 19      | +        | 1078.2457                  | 77.6                  | -2                         | II                     |
| 46   | 3      | 43     | -       | 47    | 3       | 44      | -        | 1078.2591                  | 13.8                  | 3                          | II                     |
| 45   | 5      | 41     | -       | 46    | 5       | 42      | -        | 1078.3253                  | 69.7                  | 1                          | I                      |
| 47   | 3      | 45     | +       | 48    | 3       | 46      | +        | 1078.3253                  | 69.7                  | -7                         | I                      |
| 45   | 5      | 41     | +       | 46    | 5       | 42      | +        | 1078.3253                  | 69.7                  | 8                          | I                      |
| 47   | 3      | 45     | -       | 48    | 3       | 46      | -        | 1078.3253                  | 69.7                  | -10                        | I                      |
| 43   | 11     | 33     | +       | 44    | 11      | 34      | +        | 1078.3661                  | 91.6                  | 1                          | I                      |
| 43   | 11     | 33     | -       | 44    | 11      | 34      | -        | 1078.3691                  | 90.2                  | 2                          | I                      |
| 48   | 1      | 47     | +       | 49    | 1       | 48      | +        | 1078.3866                  | 75.8                  | 0                          | I                      |
| 48   | 1      | 47     | -       | 49    | 1       | 48      | -        | 1078.3866                  | 75.8                  | 0                          | I                      |
| 37   | 21     | 17     | +       | 38    | 21      | 18      | +        | 1078.3941                  | 79.2                  | 0                          | II                     |
| 37   | 21     | 17     | -       | 38    | 21      | 18      | -        | 1078.4151                  | 74.8                  | -1                         | II                     |
| 49   | 1      | 49     | -       | 50    | 1       | 50      | -        | 1078.4674                  | 76.6                  | 0                          | I                      |
| 49   | 1      | 49     | +       | 50    | 1       | 50      | +        | 1078.4674                  | 76.6                  | 0                          | I                      |
| 41   | 15     | 27     | +       | 42    | 15      | 28      | +        | 1078.4789                  | 47.8                  | 2                          | II                     |
| 41   | 15     | 27     | -       | 42    | 15      | 28      | -        | 1078.4872                  | 45.5                  | 1                          | II                     |
| 42   | 13     | 29     | -       | 43    | 13      | 30      | -        | 1078.4988                  | 93.7                  | -1                         | I                      |
| 36   | 22     | 14     | -       | 37    | 22      | 15      | -        | 1078.5325                  | 85.1                  | -1                         | II                     |
| 35   | 23     | 13     | +       | 36    | 23      | 14      | +        | 1078.5895                  | 63.2                  | 6                          | II                     |
| 39   | 18     | 22     | -       | 40    | 18      | 23      | -        | 1078.5946                  | 85.4                  | 7                          | II                     |
| 35   | 23     | 13     | -       | 36    | 23      | 14      | -        | 1078.6166                  | 86.5                  | 1                          | II                     |
| 43   | 10     | 34     | +       | 44    | 10      | 35      | +        | 1078.6218                  | 22.1                  | 1                          | II                     |
| 43   | 10     | 34     | -       | 44    | 10      | 35      | -        | 1078.6231                  | 22.4                  | -3                         | II                     |
| 34   | 24     | 10     | +       | 35    | 24      | 11      | +        | 1078.6357                  | 91.6                  | 2                          | II                     |
| 33   | 25     | 9      | +       | 34    | 25      | 10      | +        | 1078.6492                  | 76.0                  | 13                         | II                     |
| 34   | 24     | 10     | -       | 35    | 24      | 11      | -        | 1078.6665                  | 86.4                  | -2                         | II                     |
| 44   | 4      | 40     | +       | 45    | 4       | 41      | +        | 1078.7568                  | 84.7                  | -5                         | I                      |

| $N'$ | $K'_a$ | $K'_c$ | $J'^a)$ | $N''$ | $K''_a$ | $K''_c$ | $J''^b)$ | $\nu$ , exp. <sup>c)</sup> | Transm. <sup>d)</sup> | $\delta_\nu$ <sup>e)</sup> | Spectrum <sup>f)</sup> |
|------|--------|--------|---------|-------|---------|---------|----------|----------------------------|-----------------------|----------------------------|------------------------|
|      |        | 1      |         |       |         | 2       |          | 3                          | 4                     | 5                          | 6                      |
| 38   | 19     | 19     | +       | 39    | 19      | 20      | +        | 1078.7912                  | 40.2                  | -6                         | II                     |
| 40   | 16     | 24     | +       | 41    | 16      | 25      | +        | 1078.7912                  | 40.2                  | 4                          | II                     |
| 40   | 16     | 24     | -       | 41    | 16      | 25      | -        | 1078.8011                  | 49.4                  | 0                          | II                     |
| 42   | 12     | 30     | +       | 43    | 12      | 31      | +        | 1078.8241                  | 91.9                  | -3                         | I                      |
| 42   | 12     | 30     | -       | 43    | 12      | 31      | -        | 1078.8286                  | 91.9                  | 0                          | II                     |
| 43   | 9      | 35     | -       | 44    | 9       | 36      | -        | 1078.8340                  | 83.1                  | -4                         | I                      |
| 43   | 9      | 35     | +       | 44    | 9       | 36      | +        | 1078.8340                  | 83.1                  | 3                          | I                      |
| 41   | 14     | 28     | +       | 42    | 14      | 29      | +        | 1078.8749                  | 42.9                  | 1                          | II                     |
| 41   | 14     | 28     | -       | 42    | 14      | 29      | -        | 1078.8818                  | 45.2                  | -1                         | II                     |
| 58   | 6      | 52     | +       | 58    | 8       | 51      | +        | 1078.9409                  | 93.9                  | 4                          | II                     |
| 45   | 4      | 42     | -       | 46    | 4       | 43      | -        | 1078.9889                  | 78.5                  | -7                         | I                      |
| 45   | 4      | 42     | +       | 46    | 4       | 43      | +        | 1078.9889                  | 78.5                  | -1                         | I                      |
| 43   | 8      | 36     | -       | 44    | 8       | 37      | -        | 1078.9970                  | 79.5                  | 0                          | I                      |
| 43   | 8      | 36     | +       | 44    | 8       | 37      | +        | 1078.9970                  | 79.5                  | -2                         | I                      |
| 46   | 2      | 44     | +       | 47    | 2       | 45      | +        | 1079.0225                  | 80.9                  | 1                          | II                     |
| 46   | 2      | 44     | -       | 47    | 2       | 45      | -        | 1079.0225                  | 80.9                  | -2                         | II                     |
| 47   | 2      | 46     | -       | 48    | 2       | 47      | -        | 1079.0836                  | 75.4                  | 0                          | I                      |
| 47   | 2      | 46     | +       | 48    | 2       | 47      | +        | 1079.0836                  | 75.4                  | 0                          | I                      |
| 36   | 21     | 15     | +       | 37    | 21      | 16      | +        | 1079.1135                  | 78.1                  | -2                         | II                     |
| 42   | 11     | 31     | +       | 43    | 11      | 32      | +        | 1079.1209                  | 90.9                  | 0                          | I                      |
| 42   | 11     | 31     | -       | 43    | 11      | 32      | -        | 1079.1241                  | 90.3                  | 1                          | I                      |
| 43   | 7      | 37     | -       | 44    | 7       | 38      | -        | 1079.1316                  | 78.9                  | 3                          | I                      |
| 43   | 7      | 37     | +       | 44    | 7       | 38      | +        | 1079.1316                  | 78.9                  | -4                         | I                      |
| 36   | 21     | 15     | -       | 37    | 21      | 16      | -        | 1079.1364                  | 25.5                  | 8                          | II                     |
| 48   | 0      | 48     | -       | 49    | 0       | 49      | -        | 1079.1627                  | 75.0                  | 0                          | I                      |
| 48   | 0      | 48     | +       | 49    | 0       | 49      | +        | 1079.1627                  | 75.0                  | 0                          | I                      |
| 29   | 28     | 2      | -       | 30    | 28      | 3       | -        | 1079.2187                  | 47.8                  | -1                         | II                     |
| 40   | 15     | 25     | +       | 41    | 15      | 26      | +        | 1079.2187                  | 47.8                  | 1                          | II                     |
| 35   | 22     | 14     | +       | 36    | 22      | 15      | +        | 1079.2238                  | 85.6                  | 0                          | II                     |
| 40   | 15     | 25     | -       | 41    | 15      | 26      | -        | 1079.2273                  | 49.6                  | 0                          | II                     |
| 41   | 13     | 29     | +       | 42    | 13      | 30      | +        | 1079.2401                  | 93.1                  | 0                          | I                      |
| 41   | 13     | 29     | -       | 42    | 13      | 30      | -        | 1079.2458                  | 93.7                  | 0                          | I                      |
| 55   | 3      | 53     | -       | 55    | 3       | 52      | -        | 1079.2948                  | 98.6                  | 1                          | I                      |
| 34   | 23     | 11     | +       | 35    | 23      | 12      | +        | 1079.3000                  | 89.2                  | 0                          | II                     |
| 30   | 27     | 3      | -       | 31    | 27      | 4       | -        | 1079.3101                  | 91.8                  | 3                          | II                     |
| 31   | 26     | 6      | +       | 32    | 26      | 7       | +        | 1079.3241                  | 92.3                  | 0                          | II                     |
| 34   | 23     | 11     | -       | 35    | 23      | 12      | -        | 1079.3285                  | 76.3                  | -3                         | II                     |
| 43   | 6      | 38     | -       | 44    | 6       | 39      | -        | 1079.3401                  | 75.3                  | 0                          | I                      |
| 55   | 3      | 53     | +       | 55    | 3       | 52      | +        | 1079.3401                  | 75.3                  | 4                          | I                      |
| 43   | 6      | 38     | +       | 44    | 6       | 39      | +        | 1079.3401                  | 75.3                  | -4                         | I                      |
| 32   | 25     | 7      | +       | 33    | 25      | 8       | +        | 1079.3507                  | 83.0                  | 2                          | II                     |
| 31   | 26     | 6      | -       | 32    | 26      | 7       | -        | 1079.3650                  | 47.8                  | -8                         | II                     |
| 42   | 10     | 32     | +       | 43    | 10      | 33      | +        | 1079.3796                  | 82.8                  | -2                         | I                      |
| 42   | 10     | 32     | -       | 43    | 10      | 33      | -        | 1079.3817                  | 85.0                  | 0                          | I                      |
| 42   | 5      | 37     | +       | 43    | 5       | 38      | +        | 1079.4952                  | 73.0                  | -1                         | I                      |
| 37   | 19     | 19     | +       | 38    | 19      | 20      | +        | 1079.5172                  | 15.0                  | 2                          | II                     |
| 39   | 16     | 24     | +       | 40    | 16      | 25      | +        | 1079.5264                  | 51.8                  | 3                          | II                     |
| 39   | 16     | 24     | -       | 40    | 16      | 25      | -        | 1079.5369                  | 49.7                  | 2                          | II                     |
| 42   | 6      | 36     | -       | 43    | 6       | 37      | -        | 1079.5576                  | 85.0                  | 0                          | I                      |
| 42   | 6      | 36     | +       | 43    | 6       | 37      | +        | 1079.5618                  | 85.6                  | 1                          | I                      |
| 41   | 12     | 30     | +       | 42    | 12      | 31      | +        | 1079.5732                  | 91.8                  | 0                          | I                      |
| 41   | 12     | 30     | -       | 42    | 12      | 31      | -        | 1079.5775                  | 91.6                  | -1                         | I                      |
| 42   | 9      | 33     | +       | 43    | 9       | 34      | +        | 1079.5957                  | 81.4                  | 5                          | I                      |
| 42   | 9      | 33     | -       | 43    | 9       | 34      | -        | 1079.5957                  | 81.4                  | -3                         | I                      |
| 40   | 14     | 26     | +       | 41    | 14      | 27      | +        | 1079.6165                  | 39.2                  | 1                          | II                     |
| 40   | 14     | 26     | -       | 41    | 14      | 27      | -        | 1079.6236                  | 42.0                  | -1                         | II                     |
| 44   | 3      | 41     | +       | 45    | 3       | 42      | +        | 1079.6415                  | 84.1                  | -4                         | I                      |
| 44   | 3      | 41     | -       | 45    | 3       | 42      | -        | 1079.6434                  | 84.6                  | 2                          | I                      |
| 62   | 5      | 57     | -       | 62    | 7       | 56      | -        | 1079.6901                  | 60.3                  | 1                          | II                     |
| 36   | 20     | 16     | +       | 37    | 20      | 17      | +        | 1079.6903                  | 60.3                  | -3                         | II                     |
| 36   | 20     | 16     | -       | 37    | 20      | 17      | -        | 1079.7099                  | 72.5                  | -5                         | II                     |
| 45   | 3      | 43     | -       | 46    | 3       | 44      | -        | 1079.7206                  | 79.0                  | -2                         | I                      |
| 45   | 3      | 43     | +       | 46    | 3       | 44      | +        | 1079.7206                  | 79.0                  | 1                          | I                      |
| 42   | 8      | 34     | +       | 43    | 8       | 35      | +        | 1079.7509                  | 77.2                  | -2                         | I                      |
| 42   | 8      | 34     | -       | 43    | 8       | 35      | -        | 1079.7509                  | 77.2                  | 1                          | I                      |
| 43   | 5      | 39     | +       | 44    | 5       | 40      | +        | 1079.7599                  | 78.2                  | 0                          | I                      |
| 43   | 5      | 39     | -       | 44    | 5       | 40      | -        | 1079.7599                  | 78.2                  | -4                         | I                      |
| 46   | 1      | 45     | +       | 47    | 1       | 46      | +        | 1079.7779                  | 74.8                  | 1                          | I                      |
| 46   | 1      | 45     | -       | 47    | 1       | 46      | -        | 1079.7779                  | 74.8                  | 1                          | I                      |
| 42   | 7      | 35     | +       | 43    | 7       | 36      | +        | 1079.7809                  | 83.8                  | -20                        | I                      |
| 42   | 7      | 35     | -       | 43    | 7       | 36      | -        | 1079.7809                  | 83.8                  | 3                          | I                      |
| 35   | 21     | 15     | +       | 36    | 21      | 16      | +        | 1079.8303                  | 80.3                  | 0                          | II                     |

| $N'$ | $K'_a$ | $K'_c$ | $J'^a)$ | $N''$ | $K''_a$ | $K''_c$ | $J''^b)$ | $\nu$ , exp. <sup>c)</sup> | Transm. <sup>d)</sup> | $\delta_\nu$ <sup>e)</sup> | Spectrum <sup>f)</sup> |
|------|--------|--------|---------|-------|---------|---------|----------|----------------------------|-----------------------|----------------------------|------------------------|
|      |        | 1      |         |       |         | 2       |          | 3                          | 4                     | 5                          | 6                      |
| 47   | 1      | 47     | +       | 48    | 1       | 48      | +        | 1079.8552                  | 72.8                  | 0                          | I                      |
| 47   | 1      | 47     | -       | 48    | 1       | 48      | -        | 1079.8552                  | 72.8                  | 0                          | I                      |
| 41   | 11     | 31     | +       | 42    | 11      | 32      | +        | 1079.8713                  | 77.7                  | -9                         | I                      |
| 41   | 11     | 31     | -       | 42    | 11      | 32      | -        | 1079.8753                  | 89.6                  | -1                         | I                      |
| 29   | 27     | 3      | +       | 30    | 27      | 4       | +        | 1079.9554                  | 45.6                  | 13                         | II                     |
| 39   | 15     | 25     | +       | 40    | 15      | 26      | +        | 1079.9554                  | 45.6                  | 1                          | II                     |
| 40   | 13     | 27     | +       | 41    | 13      | 28      | +        | 1079.9833                  | 92.7                  | -1                         | I                      |
| 40   | 13     | 27     | -       | 41    | 13      | 28      | -        | 1079.9892                  | 92.9                  | -1                         | I                      |
| 29   | 27     | 3      | -       | 30    | 27      | 4       | -        | 1080.0031                  | 91.6                  | -6                         | II                     |
| 33   | 23     | 11     | +       | 34    | 23      | 12      | +        | 1080.0092                  | 66.3                  | 10                         | II                     |
| 31   | 25     | 7      | +       | 32    | 25      | 8       | +        | 1080.0494                  | 41.4                  | -9                         | II                     |
| 30   | 26     | 4      | -       | 31    | 26      | 5       | -        | 1080.0641                  | 82.0                  | 5                          | II                     |
| 31   | 25     | 7      | -       | 32    | 25      | 8       | -        | 1080.0895                  | 93.6                  | 4                          | II                     |
| 68   | 7      | 61     | +       | 69    | 9       | 60      | +        | 1080.1124                  | 83.8                  | 1                          | I                      |
| 42   | 4      | 38     | +       | 43    | 4       | 39      | +        | 1080.1124                  | 83.8                  | -3                         | I                      |
| 42   | 4      | 38     | -       | 43    | 4       | 39      | -        | 1080.1156                  | 83.5                  | 0                          | I                      |
| 41   | 10     | 32     | -       | 42    | 10      | 33      | -        | 1080.1363                  | 88.0                  | -1                         | I                      |
| 36   | 19     | 17     | +       | 37    | 19      | 18      | +        | 1080.2389                  | 66.1                  | -2                         | II                     |
| 38   | 16     | 22     | +       | 39    | 16      | 23      | +        | 1080.2584                  | 47.9                  | 2                          | II                     |
| 38   | 16     | 22     | -       | 39    | 16      | 23      | -        | 1080.2693                  | 51.0                  | 0                          | II                     |
| 40   | 12     | 28     | -       | 41    | 12      | 29      | -        | 1080.3230                  | 87.1                  | -1                         | II                     |
| 41   | 9      | 33     | -       | 42    | 9       | 34      | -        | 1080.3552                  | 77.1                  | -8                         | I                      |
| 41   | 9      | 33     | +       | 42    | 9       | 34      | +        | 1080.3552                  | 77.1                  | 2                          | I                      |
| 39   | 14     | 26     | -       | 40    | 14      | 27      | -        | 1080.3621                  | 36.8                  | -1                         | II                     |
| 43   | 4      | 40     | -       | 44    | 4       | 41      | -        | 1080.3873                  | 72.8                  | -4                         | I                      |
| 43   | 4      | 40     | +       | 44    | 4       | 41      | +        | 1080.3873                  | 72.8                  | 3                          | I                      |
| 44   | 2      | 42     | -       | 45    | 2       | 43      | -        | 1080.4102                  | 72.8                  | -1                         | I                      |
| 44   | 2      | 42     | +       | 45    | 2       | 43      | +        | 1080.4102                  | 72.8                  | 3                          | I                      |
| 45   | 2      | 44     | -       | 46    | 2       | 45      | -        | 1080.4695                  | 73.6                  | 1                          | I                      |
| 45   | 2      | 44     | +       | 46    | 2       | 45      | +        | 1080.4695                  | 73.6                  | 0                          | I                      |
| 41   | 8      | 34     | +       | 42    | 8       | 35      | +        | 1080.5283                  | 74.8                  | -1                         | I                      |
| 41   | 8      | 34     | -       | 42    | 8       | 35      | -        | 1080.5283                  | 74.8                  | 0                          | I                      |
| 51   | 2      | 50     | +       | 51    | 2       | 49      | +        | 1080.5283                  | 74.8                  | -6                         | I                      |
| 46   | 0      | 46     | +       | 47    | 0       | 47      | +        | 1080.5448                  | 69.7                  | -1                         | I                      |
| 46   | 0      | 46     | -       | 47    | 0       | 47      | -        | 1080.5448                  | 69.7                  | 0                          | I                      |
| 34   | 21     | 13     | +       | 35    | 21      | 14      | +        | 1080.5448                  | 69.7                  | 6                          | I                      |
| 34   | 21     | 13     | -       | 35    | 21      | 14      | -        | 1080.5679                  | 80.1                  | -1                         | II                     |
| 40   | 11     | 29     | +       | 41    | 11      | 30      | +        | 1080.6198                  | 88.0                  | -1                         | I                      |
| 40   | 11     | 29     | -       | 41    | 11      | 30      | -        | 1080.6233                  | 90.0                  | -1                         | I                      |
| 33   | 22     | 12     | +       | 34    | 22      | 13      | +        | 1080.6454                  | 69.1                  | -4                         | II                     |
| 41   | 7      | 35     | -       | 42    | 7       | 36      | -        | 1080.6625                  | 72.4                  | 1                          | I                      |
| 33   | 22     | 12     | -       | 34    | 22      | 13      | -        | 1080.6733                  | 72.6                  | 0                          | II                     |
| 38   | 15     | 23     | +       | 39    | 15      | 24      | +        | 1080.6890                  | 37.8                  | 1                          | II                     |
| 38   | 15     | 23     | -       | 39    | 15      | 24      | -        | 1080.6982                  | 42.7                  | -1                         | II                     |
| 39   | 13     | 27     | +       | 40    | 13      | 28      | +        | 1080.7233                  | 92.2                  | 0                          | I                      |
| 39   | 13     | 27     | -       | 40    | 13      | 28      | -        | 1080.7297                  | 90.7                  | 2                          | I                      |
| 32   | 23     | 9      | -       | 33    | 23      | 10      | -        | 1080.7455                  | 84.6                  | 3                          | II                     |
| 30   | 25     | 5      | +       | 31    | 25      | 6       | +        | 1080.7477                  | 83.9                  | 3                          | II                     |
| 31   | 24     | 8      | +       | 32    | 24      | 9       | +        | 1080.7477                  | 83.9                  | 1                          | II                     |
| 31   | 24     | 8      | -       | 32    | 24      | 9       | -        | 1080.7838                  | 91.9                  | 2                          | II                     |
| 30   | 25     | 5      | -       | 31    | 25      | 6       | -        | 1080.7885                  | 49.9                  | 3                          | II                     |
| 59   | 5      | 55     | -       | 59    | 5       | 54      | -        | 1080.8322                  | 85.2                  | -2                         | II                     |
| 41   | 6      | 36     | +       | 42    | 6       | 37      | +        | 1080.8370                  | 72.5                  | -4                         | I                      |
| 41   | 6      | 36     | -       | 42    | 6       | 37      | -        | 1080.8370                  | 72.5                  | 3                          | I                      |
| 40   | 10     | 30     | +       | 41    | 10      | 31      | +        | 1080.8850                  | 86.8                  | -1                         | I                      |
| 35   | 19     | 17     | +       | 36    | 19      | 18      | +        | 1080.9580                  | 68.1                  | -3                         | II                     |
| 35   | 19     | 17     | -       | 36    | 19      | 18      | -        | 1080.9763                  | 34.7                  | -6                         | II                     |
| 37   | 16     | 22     | -       | 38    | 16      | 23      | -        | 1080.9988                  | 94.8                  | 0                          | I                      |
| 42   | 3      | 39     | +       | 43    | 3       | 40      | +        | 1081.0090                  | 81.4                  | -4                         | I                      |
| 42   | 3      | 39     | -       | 43    | 3       | 40      | -        | 1081.0113                  | 81.1                  | 4                          | I                      |
| 40   | 5      | 35     | -       | 41    | 5       | 36      | -        | 1081.0271                  | 54.4                  | 6                          | I                      |
| 40   | 5      | 35     | +       | 41    | 5       | 36      | +        | 1081.0271                  | 54.4                  | -13                        | I                      |
| 39   | 12     | 28     | +       | 40    | 12      | 29      | +        | 1081.0603                  | 90.0                  | 0                          | I                      |
| 39   | 12     | 28     | -       | 40    | 12      | 29      | -        | 1081.0653                  | 80.0                  | 1                          | I                      |
| 38   | 14     | 24     | +       | 39    | 14      | 25      | +        | 1081.0893                  | 89.3                  | -3                         | I                      |
| 38   | 14     | 24     | -       | 39    | 14      | 25      | -        | 1081.0979                  | 88.7                  | 4                          | I                      |
| 43   | 3      | 41     | -       | 44    | 3       | 42      | -        | 1081.1044                  | 74.7                  | -1                         | I                      |
| 43   | 3      | 41     | +       | 44    | 3       | 42      | +        | 1081.1044                  | 74.7                  | 1                          | I                      |
| 40   | 9      | 31     | +       | 41    | 9       | 32      | +        | 1081.1097                  | 79.6                  | 4                          | II                     |
| 40   | 9      | 31     | -       | 41    | 9       | 32      | -        | 1081.1097                  | 79.6                  | -7                         | II                     |
| 44   | 1      | 43     | -       | 45    | 1       | 44      | -        | 1081.1581                  | 70.0                  | 1                          | I                      |
| 44   | 1      | 43     | +       | 45    | 1       | 44      | +        | 1081.1581                  | 70.0                  | 0                          | I                      |

| $N'$ | $K'_a$ | $K'_c$ | $J'^a)$ | $N''$ | $K''_a$ | $K''_c$ | $J''^b)$ | $\nu$ , exp. <sup>c)</sup> | Transm. <sup>d)</sup> | $\delta_\nu$ <sup>e)</sup> | Spectrum <sup>f)</sup> |
|------|--------|--------|---------|-------|---------|---------|----------|----------------------------|-----------------------|----------------------------|------------------------|
|      |        | 1      |         |       |         | 2       |          | 3                          | 4                     | 5                          | 6                      |
| 41   | 5      | 37     | +       | 42    | 5       | 38      | +        | 1081.1957                  | 69.6                  | 1                          | I                      |
| 41   | 5      | 37     | -       | 42    | 5       | 38      | -        | 1081.1957                  | 69.6                  | -1                         | I                      |
| 40   | 6      | 34     | -       | 41    | 6       | 35      | -        | 1081.1957                  | 69.6                  | -20                        | I                      |
| 40   | 6      | 34     | +       | 41    | 6       | 35      | +        | 1081.2018                  | 81.8                  | 1                          | I                      |
| 45   | 1      | 45     | -       | 46    | 1       | 46      | -        | 1081.2319                  | 66.2                  | 0                          | I                      |
| 45   | 1      | 45     | +       | 46    | 1       | 46      | +        | 1081.2319                  | 66.2                  | -1                         | I                      |
| 33   | 21     | 13     | +       | 34    | 21      | 14      | +        | 1081.2549                  | 76.9                  | 0                          | II                     |
| 40   | 8      | 32     | -       | 41    | 8       | 33      | -        | 1081.2809                  | 73.0                  | 0                          | I                      |
| 33   | 21     | 13     | -       | 34    | 21      | 14      | -        | 1081.2809                  | 73.0                  | 9                          | I                      |
| 40   | 8      | 32     | +       | 41    | 8       | 33      | +        | 1081.2809                  | 73.0                  | -1                         | I                      |
| 27   | 27     | 1      | +       | 28    | 27      | 2       | +        | 1081.3290                  | 84.5                  | 1                          | II                     |
| 40   | 7      | 33     | +       | 41    | 7       | 34      | +        | 1081.3546                  | 71.4                  | -16                        | I                      |
| 40   | 7      | 33     | -       | 41    | 7       | 34      | -        | 1081.3546                  | 71.4                  | 1                          | I                      |
| 55   | 4      | 52     | -       | 55    | 4       | 51      | -        | 1081.3640                  | 18.8                  | 3                          | II                     |
| 39   | 11     | 29     | +       | 40    | 11      | 30      | +        | 1081.3640                  | 88.7                  | -1                         | I                      |
| 39   | 11     | 29     | -       | 40    | 11      | 30      | -        | 1081.3676                  | 88.7                  | -1                         | II                     |
| 28   | 26     | 2      | +       | 29    | 26      | 3       | +        | 1081.4026                  | 89.6                  | -3                         | II                     |
| 37   | 15     | 23     | +       | 38    | 15      | 24      | +        | 1081.4193                  | 93.3                  | 2                          | I                      |
| 37   | 15     | 23     | -       | 38    | 15      | 24      | -        | 1081.4295                  | 92.2                  | 5                          | I                      |
| 30   | 24     | 6      | +       | 31    | 24      | 7       | +        | 1081.4462                  | 87.5                  | 1                          | II                     |
| 38   | 13     | 25     | +       | 39    | 13      | 26      | +        | 1081.4600                  | 91.0                  | 0                          | I                      |
| 38   | 13     | 25     | -       | 39    | 13      | 26      | -        | 1081.4664                  | 91.2                  | 0                          | I                      |
| 40   | 4      | 36     | +       | 41    | 4       | 37      | +        | 1081.4760                  | 78.8                  | 1                          | I                      |
| 40   | 4      | 36     | -       | 41    | 4       | 37      | -        | 1081.4780                  | 77.4                  | -1                         | I                      |
| 39   | 10     | 30     | +       | 40    | 10      | 31      | +        | 1081.6321                  | 85.9                  | 0                          | I                      |
| 39   | 10     | 30     | -       | 40    | 10      | 31      | -        | 1081.6344                  | 86.6                  | -1                         | I                      |
| 34   | 19     | 15     | +       | 35    | 19      | 16      | +        | 1081.6740                  | 35.1                  | -5                         | II                     |
| 34   | 19     | 15     | -       | 35    | 19      | 16      | -        | 1081.6935                  | 59.0                  | -4                         | II                     |
| 36   | 16     | 20     | +       | 37    | 16      | 21      | +        | 1081.7135                  | 34.5                  | 4                          | II                     |
| 36   | 16     | 20     | -       | 37    | 16      | 21      | -        | 1081.7251                  | 46.2                  | 0                          | II                     |
| 41   | 4      | 38     | +       | 42    | 4       | 39      | +        | 1081.7777                  | 69.8                  | -3                         | I                      |
| 42   | 2      | 40     | +       | 43    | 2       | 41      | +        | 1081.7858                  | 73.4                  | 2                          | I                      |
| 42   | 2      | 40     | -       | 43    | 2       | 41      | -        | 1081.7858                  | 73.4                  | -3                         | I                      |
| 38   | 12     | 26     | +       | 39    | 12      | 27      | +        | 1081.7991                  | 83.9                  | 4                          | II                     |
| 38   | 12     | 26     | -       | 39    | 12      | 27      | -        | 1081.8039                  | 89.1                  | 1                          | I                      |
| 37   | 14     | 24     | +       | 38    | 14      | 25      | +        | 1081.8216                  | 76.8                  | 3                          | I                      |
| 37   | 14     | 24     | -       | 38    | 14      | 25      | -        | 1081.8295                  | 76.8                  | -1                         | I                      |
| 33   | 20     | 14     | +       | 34    | 20      | 15      | +        | 1081.8354                  | 69.8                  | 0                          | II                     |
| 43   | 2      | 42     | -       | 44    | 2       | 43      | -        | 1081.8443                  | 68.7                  | 1                          | I                      |
| 43   | 2      | 42     | +       | 44    | 2       | 43      | +        | 1081.8443                  | 68.7                  | 0                          | I                      |
| 39   | 9      | 31     | +       | 40    | 9       | 32      | +        | 1081.8612                  | 78.9                  | 6                          | I                      |
| 39   | 9      | 31     | -       | 40    | 9       | 32      | -        | 1081.8612                  | 78.9                  | -7                         | I                      |
| 44   | 0      | 44     | +       | 45    | 0       | 45      | +        | 1081.9161                  | 65.1                  | -1                         | I                      |
| 44   | 0      | 44     | -       | 45    | 0       | 45      | -        | 1081.9161                  | 65.1                  | 0                          | I                      |
| 32   | 21     | 11     | +       | 33    | 21      | 12      | +        | 1081.9625                  | 73.5                  | -2                         | II                     |
| 39   | 8      | 32     | -       | 40    | 8       | 33      | -        | 1082.0437                  | 71.0                  | -1                         | I                      |
| 39   | 8      | 32     | +       | 40    | 8       | 33      | +        | 1082.0437                  | 71.0                  | 1                          | I                      |
| 31   | 22     | 10     | +       | 32    | 22      | 11      | +        | 1082.0567                  | 73.8                  | 3                          | II                     |
| 38   | 11     | 27     | +       | 39    | 11      | 28      | +        | 1082.1049                  | 82.9                  | 2                          | I                      |
| 38   | 11     | 27     | -       | 39    | 11      | 28      | -        | 1082.1080                  | 84.8                  | -5                         | I                      |
| 28   | 25     | 3      | +       | 29    | 25      | 4       | +        | 1082.1325                  | 35.1                  | -8                         | II                     |
| 29   | 24     | 6      | +       | 30    | 24      | 7       | +        | 1082.1420                  | 90.0                  | 2                          | II                     |
| 27   | 26     | 2      | -       | 28    | 26      | 3       | -        | 1082.1420                  | 90.0                  | 2                          | II                     |
| 36   | 15     | 21     | +       | 37    | 15      | 22      | +        | 1082.1466                  | 32.7                  | 3                          | II                     |
| 36   | 15     | 21     | -       | 37    | 15      | 22      | -        | 1082.1565                  | 32.0                  | -1                         | II                     |
| 28   | 25     | 3      | -       | 29    | 25      | 4       | -        | 1082.1778                  | 84.9                  | -9                         | II                     |
| 39   | 7      | 33     | +       | 40    | 7       | 34      | +        | 1082.1826                  | 68.5                  | -4                         | I                      |
| 39   | 7      | 33     | -       | 40    | 7       | 34      | -        | 1082.1826                  | 68.5                  | 3                          | I                      |
| 29   | 24     | 6      | -       | 30    | 24      | 7       | -        | 1082.1826                  | 68.5                  | 9                          | I                      |
| 37   | 13     | 25     | +       | 38    | 13      | 26      | +        | 1082.1932                  | 90.5                  | 0                          | I                      |
| 37   | 13     | 25     | -       | 38    | 13      | 26      | -        | 1082.1999                  | 90.5                  | -1                         | I                      |
| 39   | 6      | 34     | +       | 40    | 6       | 35      | +        | 1082.3323                  | 68.0                  | -5                         | I                      |
| 39   | 6      | 34     | -       | 40    | 6       | 35      | -        | 1082.3323                  | 68.0                  | 4                          | I                      |
| 40   | 3      | 37     | +       | 41    | 3       | 38      | +        | 1082.3584                  | 76.9                  | -4                         | I                      |
| 40   | 3      | 37     | -       | 41    | 3       | 38      | -        | 1082.3609                  | 78.5                  | 3                          | I                      |
| 38   | 10     | 28     | +       | 39    | 10      | 29      | +        | 1082.3756                  | 84.3                  | 1                          | I                      |
| 38   | 10     | 28     | -       | 39    | 10      | 29      | -        | 1082.3780                  | 84.3                  | -1                         | I                      |
| 33   | 19     | 15     | -       | 34    | 19      | 16      | -        | 1082.4076                  | 63.2                  | -3                         | II                     |
| 35   | 16     | 20     | +       | 36    | 16      | 21      | +        | 1082.4359                  | 41.8                  | 1                          | II                     |
| 35   | 16     | 20     | -       | 36    | 16      | 21      | -        | 1082.4484                  | 43.7                  | 0                          | II                     |
| 41   | 3      | 39     | -       | 42    | 3       | 40      | -        | 1082.4776                  | 70.6                  | -3                         | I                      |
| 41   | 3      | 39     | +       | 42    | 3       | 40      | +        | 1082.4776                  | 70.6                  | 1                          | I                      |

| $N'$ | $K'_a$ | $K'_c$ | $J'^a)$ | $N''$ | $K''_a$ | $K''_c$ | $J''^b)$ | $\nu$ , exp. <sup>c)</sup> | Transm. <sup>d)</sup> | $\delta_\nu$ <sup>e)</sup> | Spectrum <sup>f)</sup> |
|------|--------|--------|---------|-------|---------|---------|----------|----------------------------|-----------------------|----------------------------|------------------------|
|      |        | 1      |         |       |         | 2       |          | 3                          | 4                     | 5                          | 6                      |
| 42   | 1      | 41     | +       | 43    | 1       | 42      | +        | 1082.5273                  | 66.4                  | 0                          | I                      |
| 42   | 1      | 41     | -       | 43    | 1       | 42      | -        | 1082.5273                  | 66.4                  | 1                          | I                      |
| 37   | 12     | 26     | +       | 38    | 12      | 27      | +        | 1082.5338                  | 88.4                  | 0                          | I                      |
| 37   | 12     | 26     | -       | 38    | 12      | 27      | -        | 1082.5392                  | 88.5                  | 0                          | I                      |
| 32   | 20     | 12     | +       | 33    | 20      | 13      | +        | 1082.5438                  | 67.2                  | -6                         | I                      |
| 1 36 | 14     | 22     | +       | 37    | 14      | 23      | +        | 1082.5498                  | 91.0                  | 0                          | I                      |
| 36   | 14     | 22     | -       | 37    | 14      | 23      | -        | 1082.5585                  | 90.7                  | 0                          | I                      |
| 32   | 20     | 12     | -       | 33    | 20      | 13      | -        | 1082.5682                  | 72.2                  | -2                         | II                     |
| 38   | 5      | 33     | -       | 39    | 5       | 34      | -        | 1082.5852                  | 77.8                  | 0                          | I                      |
| 43   | 1      | 43     | +       | 44    | 1       | 44      | +        | 1082.5976                  | 62.7                  | -1                         | I                      |
| 43   | 1      | 43     | -       | 44    | 1       | 44      | -        | 1082.5976                  | 62.7                  | 0                          | I                      |
| 38   | 9      | 29     | +       | 39    | 9       | 30      | +        | 1082.6089                  | 51.7                  | 16                         | I                      |
| 38   | 9      | 29     | -       | 39    | 9       | 30      | -        | 1082.6089                  | 51.7                  | 2                          | I                      |
| 39   | 5      | 35     | +       | 40    | 5       | 36      | +        | 1082.6326                  | 65.6                  | -2                         | I                      |
| 39   | 5      | 35     | -       | 40    | 5       | 36      | -        | 1082.6326                  | 65.6                  | -1                         | I                      |
| 57   | 5      | 53     | -       | 57    | 5       | 52      | -        | 1082.6458                  | 95.2                  | 11                         | II                     |
| 31   | 21     | 11     | +       | 32    | 21      | 12      | +        | 1082.6684                  | 45.5                  | 6                          | II                     |
| 34   | 17     | 17     | -       | 35    | 17      | 18      | -        | 1082.7058                  | 94.3                  | 0                          | I                      |
| 38   | 8      | 30     | -       | 39    | 8       | 31      | -        | 1082.7920                  | 68.8                  | -1                         | I                      |
| 38   | 8      | 30     | +       | 39    | 8       | 31      | +        | 1082.7920                  | 68.8                  | 1                          | I                      |
| 38   | 6      | 32     | -       | 39    | 6       | 33      | -        | 1082.8143                  | 79.3                  | 0                          | I                      |
| 38   | 6      | 32     | +       | 39    | 6       | 33      | +        | 1082.8179                  | 79.5                  | 0                          | I                      |
| 26   | 26     | 0      | -       | 27    | 26      | 1       | -        | 1082.8293                  | 93.5                  | -3                         | II                     |
| 28   | 24     | 4      | +       | 29    | 24      | 5       | +        | 1082.8354                  | 90.0                  | 6                          | II                     |
| 37   | 11     | 27     | +       | 38    | 11      | 28      | +        | 1082.8418                  | 81.7                  | 0                          | I                      |
| 37   | 11     | 27     | -       | 38    | 11      | 28      | -        | 1082.8458                  | 63.9                  | 0                          | I                      |
| 29   | 23     | 7      | -       | 30    | 23      | 8       | -        | 1082.8500                  | 62.9                  | 5                          | II                     |
| 38   | 4      | 34     | -       | 39    | 4       | 35      | -        | 1082.8604                  | 67.5                  | -6                         | I                      |
| 38   | 4      | 34     | +       | 39    | 4       | 35      | +        | 1082.8604                  | 67.5                  | 6                          | I                      |
| 35   | 15     | 21     | +       | 36    | 15      | 22      | +        | 1082.8692                  | 76.8                  | -10                        | I                      |
| 38   | 7      | 31     | -       | 39    | 7       | 32      | -        | 1082.8988                  | 70.0                  | 6                          | I                      |
| 38   | 7      | 31     | +       | 39    | 7       | 32      | +        | 1082.8988                  | 70.0                  | -6                         | I                      |
| 36   | 13     | 23     | +       | 37    | 13      | 24      | +        | 1082.9231                  | 87.2                  | -1                         | I                      |
| 36   | 13     | 23     | -       | 37    | 13      | 24      | -        | 1082.9303                  | 89.5                  | -1                         | I                      |
| 53   | 4      | 50     | +       | 53    | 4       | 49      | +        | 1083.0029                  | 80.4                  | -3                         | II                     |
| 32   | 19     | 13     | +       | 33    | 19      | 14      | +        | 1083.0975                  | 50.3                  | -2                         | II                     |
| 37   | 10     | 28     | +       | 38    | 10      | 29      | +        | 1083.1149                  | 77.1                  | -3                         | I                      |
| 37   | 10     | 28     | -       | 38    | 10      | 29      | -        | 1083.1182                  | 80.5                  | 2                          | I                      |
| 40   | 2      | 38     | -       | 41    | 2       | 39      | -        | 1083.1490                  | 69.4                  | -5                         | I                      |
| 40   | 2      | 38     | +       | 41    | 2       | 39      | +        | 1083.1490                  | 69.4                  | 1                          | I                      |
| 34   | 16     | 18     | +       | 35    | 16      | 19      | +        | 1083.1554                  | 36.4                  | 0                          | II                     |
| 39   | 4      | 36     | +       | 40    | 4       | 37      | +        | 1083.1637                  | 68.3                  | 2                          | I                      |
| 39   | 4      | 36     | -       | 40    | 4       | 37      | -        | 1083.1637                  | 68.3                  | -3                         | I                      |
| 34   | 16     | 18     | -       | 35    | 16      | 19      | -        | 1083.1686                  | 38.2                  | 0                          | II                     |
| 41   | 2      | 40     | -       | 42    | 2       | 41      | -        | 1083.2081                  | 63.4                  | 0                          | I                      |
| 41   | 2      | 40     | +       | 42    | 2       | 41      | +        | 1083.2081                  | 63.4                  | 0                          | I                      |
| 31   | 20     | 12     | +       | 32    | 20      | 13      | +        | 1083.2507                  | 61.5                  | 0                          | II                     |
| 36   | 12     | 24     | +       | 37    | 12      | 25      | +        | 1083.2653                  | 86.3                  | -2                         | I                      |
| 36   | 12     | 24     | -       | 37    | 12      | 25      | -        | 1083.2711                  | 87.8                  | 0                          | I                      |
| 42   | 0      | 42     | +       | 43    | 0       | 43      | +        | 1083.2762                  | 56.7                  | -2                         | I                      |
| 42   | 0      | 42     | -       | 43    | 0       | 43      | -        | 1083.2762                  | 56.7                  | -1                         | I                      |
| 35   | 14     | 22     | -       | 36    | 14      | 23      | -        | 1083.2841                  | 91.4                  | -1                         | II                     |
| 37   | 9      | 29     | +       | 38    | 9       | 30      | +        | 1083.3513                  | 77.9                  | 6                          | I                      |
| 37   | 9      | 29     | -       | 38    | 9       | 30      | -        | 1083.3513                  | 77.9                  | -10                        | I                      |
| 30   | 21     | 9      | +       | 31    | 21      | 10      | +        | 1083.3698                  | 65.2                  | 0                          | II                     |
| 33   | 17     | 17     | +       | 34    | 17      | 18      | +        | 1083.4062                  | 38.6                  | 3                          | II                     |
| 33   | 17     | 17     | -       | 34    | 17      | 18      | -        | 1083.4219                  | 41.5                  | 0                          | II                     |
| 29   | 22     | 8      | -       | 30    | 22      | 9       | -        | 1083.4890                  | 84.3                  | 1                          | II                     |
| 26   | 25     | 1      | +       | 27    | 25      | 2       | +        | 1083.5085                  | 73.2                  | 2                          | II                     |
| 27   | 24     | 4      | +       | 28    | 24      | 5       | +        | 1083.5248                  | 93.1                  | 0                          | II                     |
| 37   | 8      | 30     | +       | 38    | 8       | 31      | +        | 1083.5431                  | 68.4                  | 2                          | II                     |
| 37   | 8      | 30     | -       | 38    | 8       | 31      | -        | 1083.5431                  | 68.4                  | -3                         | II                     |
| 27   | 24     | 4      | -       | 28    | 24      | 5       | -        | 1083.5697                  | 88.6                  | 6                          | II                     |
| 36   | 11     | 25     | +       | 37    | 11      | 26      | +        | 1083.5754                  | 86.3                  | -1                         | I                      |
| 36   | 11     | 25     | -       | 37    | 11      | 26      | -        | 1083.5797                  | 86.6                  | 0                          | I                      |
| 34   | 15     | 19     | +       | 35    | 15      | 20      | +        | 1083.5910                  | 29.5                  | 0                          | II                     |
| 34   | 15     | 19     | -       | 35    | 15      | 20      | -        | 1083.6023                  | 32.8                  | -1                         | II                     |
| 35   | 13     | 23     | +       | 36    | 13      | 24      | +        | 1083.6498                  | 87.0                  | 0                          | I                      |
| 38   | 3      | 35     | +       | 39    | 3       | 36      | +        | 1083.6893                  | 51.6                  | -8                         | I                      |
| 37   | 7      | 31     | -       | 38    | 7       | 32      | -        | 1083.6893                  | 51.6                  | 5                          | I                      |
| 37   | 7      | 31     | +       | 38    | 7       | 32      | +        | 1083.6893                  | 51.6                  | 0                          | I                      |
| 38   | 3      | 35     | -       | 39    | 3       | 36      | -        | 1083.6925                  | 71.6                  | 3                          | I                      |

| $N'$ | $K'_a$ | $K'_c$ | $J'^a)$ | $N''$ | $K''_a$ | $K''_c$ | $J''^b)$ | $\nu$ , exp. <sup>c)</sup> | Transm. <sup>d)</sup> | $\delta_\nu$ <sup>e)</sup> | Spectrum <sup>f)</sup> |
|------|--------|--------|---------|-------|---------|---------|----------|----------------------------|-----------------------|----------------------------|------------------------|
|      |        | 1      |         |       |         | 2       |          | 3                          | 4                     | 5                          | 6                      |
| 31   | 19     | 13     | +       | 32    | 19      | 14      | +        | 1083.8049                  | 61.8                  | 0                          | II                     |
| 37   | 6      | 32     | -       | 38    | 6       | 33      | -        | 1083.8237                  | 64.4                  | 4                          | I                      |
| 37   | 6      | 32     | +       | 38    | 6       | 33      | +        | 1083.8237                  | 64.4                  | -5                         | I                      |
| 31   | 19     | 13     | -       | 32    | 19      | 14      | -        | 1083.8271                  | 52.6                  | -3                         | II                     |
| 39   | 3      | 37     | +       | 40    | 3       | 38      | +        | 1083.8406                  | 65.9                  | 1                          | I                      |
| 39   | 3      | 37     | -       | 40    | 3       | 38      | -        | 1083.8406                  | 65.9                  | -2                         | I                      |
| 36   | 10     | 26     | +       | 37    | 10      | 27      | +        | 1083.8513                  | 82.8                  | 0                          | I                      |
| 36   | 10     | 26     | -       | 37    | 10      | 27      | -        | 1083.8543                  | 81.7                  | 0                          | I                      |
| 33   | 16     | 18     | -       | 34    | 16      | 19      | -        | 1083.8854                  | 58.2                  | -4                         | I                      |
| 40   | 1      | 39     | -       | 41    | 1       | 40      | -        | 1083.8854                  | 58.2                  | 1                          | I                      |
| 40   | 1      | 39     | +       | 41    | 1       | 40      | +        | 1083.8854                  | 58.2                  | 1                          | I                      |
| 41   | 1      | 41     | +       | 42    | 1       | 42      | +        | 1083.9523                  | 57.3                  | -1                         | I                      |
| 41   | 1      | 41     | -       | 42    | 1       | 42      | -        | 1083.9523                  | 57.3                  | 0                          | I                      |
| 30   | 20     | 10     | -       | 31    | 20      | 11      | -        | 1083.9800                  | 70.9                  | -1                         | II                     |
| 35   | 12     | 24     | +       | 36    | 12      | 25      | +        | 1083.9936                  | 86.7                  | -1                         | I                      |
| 34   | 14     | 20     | +       | 35    | 14      | 21      | +        | 1083.9971                  | 89.1                  | 1                          | I                      |
| 35   | 12     | 24     | -       | 36    | 12      | 25      | -        | 1083.9995                  | 86.5                  | -1                         | I                      |
| 34   | 14     | 20     | -       | 35    | 14      | 21      | -        | 1084.0066                  | 23.9                  | -1                         | II                     |
| 37   | 5      | 33     | +       | 38    | 5       | 34      | +        | 1084.0713                  | 59.1                  | -3                         | I                      |
| 37   | 5      | 33     | -       | 38    | 5       | 34      | -        | 1084.0713                  | 59.1                  | 1                          | I                      |
| 36   | 9      | 27     | +       | 37    | 9       | 28      | +        | 1084.0900                  | 76.8                  | 1                          | I                      |
| 36   | 9      | 27     | -       | 37    | 9       | 28      | -        | 1084.0900                  | 76.8                  | -16                        | I                      |
| 29   | 21     | 9      | -       | 30    | 21      | 10      | -        | 1084.0995                  | 72.4                  | -1                         | II                     |
| 32   | 17     | 15     | +       | 33    | 17      | 16      | +        | 1084.1185                  | 34.0                  | 3                          | II                     |
| 32   | 17     | 15     | -       | 33    | 17      | 16      | -        | 1084.1357                  | 34.0                  | 7                          | II                     |
| 36   | 5      | 31     | -       | 37    | 5       | 32      | -        | 1084.1629                  | 72.7                  | 0                          | I                      |
| 36   | 5      | 31     | +       | 37    | 5       | 32      | +        | 1084.1667                  | 72.6                  | 0                          | I                      |
| 25   | 25     | 1      | +       | 26    | 25      | 2       | +        | 1084.1910                  | 95.9                  | -6                         | II                     |
| 27   | 23     | 5      | +       | 28    | 23      | 6       | +        | 1084.1983                  | 89.6                  | 1                          | II                     |
| 26   | 24     | 2      | +       | 27    | 24      | 3       | +        | 1084.2121                  | 91.2                  | 0                          | II                     |
| 27   | 23     | 5      | -       | 28    | 23      | 6       | -        | 1084.2393                  | 86.9                  | 2                          | II                     |
| 25   | 25     | 1      | -       | 26    | 25      | 2       | -        | 1084.2450                  | 92.4                  | -3                         | II                     |
| 26   | 24     | 2      | -       | 27    | 24      | 3       | -        | 1084.2591                  | 93.8                  | 2                          | II                     |
| 36   | 4      | 32     | +       | 37    | 4       | 33      | +        | 1084.2726                  | 55.0                  | -1                         | I                      |
| 36   | 4      | 32     | -       | 37    | 4       | 33      | -        | 1084.2726                  | 55.0                  | -1                         | I                      |
| 36   | 8      | 28     | -       | 37    | 8       | 29      | -        | 1084.2851                  | 67.0                  | -3                         | I                      |
| 36   | 8      | 28     | +       | 37    | 8       | 29      | +        | 1084.2851                  | 67.0                  | 3                          | I                      |
| 35   | 11     | 25     | +       | 36    | 11      | 26      | +        | 1084.3056                  | 83.9                  | 0                          | I                      |
| 35   | 11     | 25     | -       | 36    | 11      | 26      | -        | 1084.3099                  | 82.1                  | -2                         | I                      |
| 34   | 13     | 21     | +       | 35    | 13      | 22      | +        | 1084.3731                  | 14.4                  | -1                         | II                     |
| 34   | 13     | 21     | -       | 35    | 13      | 22      | -        | 1084.3810                  | 17.7                  | -1                         | II                     |
| 36   | 6      | 30     | -       | 37    | 6       | 31      | -        | 1084.3979                  | 75.8                  | 1                          | I                      |
| 36   | 6      | 30     | +       | 37    | 6       | 31      | +        | 1084.4007                  | 75.6                  | -1                         | I                      |
| 36   | 7      | 29     | +       | 37    | 7       | 30      | +        | 1084.4161                  | 61.2                  | -4                         | I                      |
| 36   | 7      | 29     | -       | 37    | 7       | 30      | -        | 1084.4161                  | 61.2                  | 4                          | I                      |
| 38   | 2      | 36     | -       | 39    | 2       | 37      | -        | 1084.4994                  | 65.6                  | -5                         | I                      |
| 38   | 2      | 36     | +       | 39    | 2       | 37      | +        | 1084.4994                  | 65.6                  | 2                          | I                      |
| 30   | 19     | 11     | +       | 31    | 19      | 12      | +        | 1084.5090                  | 59.4                  | 0                          | II                     |
| 30   | 19     | 11     | -       | 31    | 19      | 12      | -        | 1084.5326                  | 61.2                  | -1                         | II                     |
| 37   | 4      | 34     | -       | 38    | 4       | 35      | -        | 1084.5454                  | 60.5                  | -2                         | I                      |
| 37   | 4      | 34     | +       | 38    | 4       | 35      | +        | 1084.5454                  | 60.5                  | 2                          | I                      |
| 39   | 2      | 38     | +       | 40    | 2       | 39      | +        | 1084.5609                  | 58.7                  | 0                          | I                      |
| 39   | 2      | 38     | -       | 40    | 2       | 39      | -        | 1084.5609                  | 58.7                  | 0                          | I                      |
| 35   | 10     | 26     | +       | 36    | 10      | 27      | +        | 1084.5838                  | 80.3                  | 1                          | I                      |
| 32   | 16     | 16     | +       | 33    | 16      | 17      | +        | 1084.5838                  | 80.3                  | -14                        | I                      |
| 51   | 4      | 48     | -       | 51    | 4       | 47      | -        | 1084.5838                  | 80.3                  | -7                         | I                      |
| 35   | 10     | 26     | -       | 36    | 10      | 27      | -        | 1084.5868                  | 81.3                  | -1                         | I                      |
| 32   | 16     | 16     | -       | 33    | 16      | 17      | -        | 1084.5997                  | 81.3                  | -1                         | I                      |
| 40   | 0      | 40     | +       | 41    | 0       | 41      | +        | 1084.6255                  | 54.6                  | -1                         | I                      |
| 40   | 0      | 40     | -       | 41    | 0       | 41      | -        | 1084.6255                  | 54.6                  | 0                          | I                      |
| 29   | 20     | 10     | +       | 30    | 20      | 11      | +        | 1084.6541                  | 69.4                  | 1                          | II                     |
| 29   | 20     | 10     | -       | 30    | 20      | 11      | -        | 1084.6816                  | 70.6                  | 0                          | II                     |
| 33   | 14     | 20     | +       | 34    | 14      | 21      | +        | 1084.7158                  | 82.1                  | 0                          | II                     |
| 34   | 12     | 22     | +       | 35    | 12      | 23      | +        | 1084.7185                  | 85.7                  | -1                         | II                     |
| 34   | 12     | 22     | -       | 35    | 12      | 23      | -        | 1084.7252                  | 81.3                  | 3                          | I                      |
| 33   | 14     | 20     | -       | 34    | 14      | 21      | -        | 1084.7252                  | 81.3                  | -7                         | I                      |
| 45   | 2      | 44     | -       | 45    | 2       | 43      | -        | 1084.7475                  | 82.5                  | -7                         | I                      |
| 28   | 21     | 7      | +       | 29    | 21      | 8       | +        | 1084.7653                  | 76.7                  | 1                          | II                     |
| 28   | 21     | 7      | -       | 29    | 21      | 8       | -        | 1084.7976                  | 75.3                  | 1                          | II                     |
| 35   | 9      | 27     | +       | 36    | 9       | 28      | +        | 1084.8272                  | 74.2                  | 18                         | I                      |
| 31   | 17     | 15     | +       | 32    | 17      | 16      | +        | 1084.8272                  | 74.2                  | -1                         | I                      |
| 35   | 9      | 27     | -       | 36    | 9       | 28      | -        | 1084.8272                  | 74.2                  | -1                         | I                      |

| $N'$ | $K'_a$ | $K'_c$ | $J'^a)$ | $N''$ | $K''_a$ | $K''_c$ | $J''^b)$ | $\nu$ , exp. <sup>c)</sup> | Transm. <sup>d)</sup> | $\delta_\nu$ <sup>e)</sup> | Spectrum <sup>f)</sup> |
|------|--------|--------|---------|-------|---------|---------|----------|----------------------------|-----------------------|----------------------------|------------------------|
|      |        | 1      |         |       |         | 2       |          | 3                          | 4                     | 5                          | 6                      |
| 31   | 17     | 15     | —       | 32    | 17      | 16      | —        | 1084.8451                  | 44.2                  | 0                          | II                     |
| 27   | 22     | 6      | —       | 28    | 22      | 7       | —        | 1084.8804                  | 83.5                  | 1                          | II                     |
| 26   | 23     | 3      | +       | 27    | 23      | 4       | +        | 1084.8866                  | 89.7                  | 0                          | II                     |
| 26   | 23     | 3      | —       | 27    | 23      | 4       | —        | 1084.9301                  | 80.8                  | 2                          | II                     |
| 36   | 3      | 33     | +       | 37    | 3       | 34      | +        | 1085.0062                  | 70.0                  | -3                         | I                      |
| 36   | 3      | 33     | —       | 37    | 3       | 34      | —        | 1085.0089                  | 70.9                  | 1                          | I                      |
| 35   | 8      | 28     | —       | 36    | 8       | 29      | —        | 1085.0264                  | 64.8                  | -4                         | I                      |
| 35   | 8      | 28     | +       | 36    | 8       | 29      | +        | 1085.0264                  | 64.8                  | 4                          | I                      |
| 34   | 11     | 23     | —       | 35    | 11      | 24      | —        | 1085.0366                  | 3.8                   | -5                         | II                     |
| 30   | 18     | 12     | +       | 31    | 18      | 13      | +        | 1085.0366                  | 3.8                   | 10                         | II                     |
| 30   | 18     | 12     | —       | 31    | 18      | 13      | —        | 1085.0564                  | 41.8                  | -3                         | II                     |
| 33   | 13     | 21     | —       | 34    | 13      | 22      | —        | 1085.1015                  | 87.9                  | -1                         | II                     |
| 35   | 7      | 29     | +       | 36    | 7       | 30      | +        | 1085.1808                  | 59.7                  | -2                         | I                      |
| 35   | 7      | 29     | —       | 36    | 7       | 30      | —        | 1085.1808                  | 59.7                  | 2                          | I                      |
| 37   | 3      | 35     | —       | 38    | 3       | 36      | —        | 1085.1940                  | 58.3                  | -3                         | I                      |
| 37   | 3      | 35     | +       | 38    | 3       | 36      | +        | 1085.1940                  | 58.3                  | 1                          | I                      |
| 29   | 19     | 11     | +       | 30    | 19      | 12      | +        | 1085.2102                  | 61.3                  | 0                          | II                     |
| 38   | 1      | 37     | —       | 39    | 1       | 38      | —        | 1085.2321                  | 56.4                  | 0                          | I                      |
| 38   | 1      | 37     | +       | 39    | 1       | 38      | +        | 1085.2321                  | 56.4                  | 0                          | I                      |
| 31   | 16     | 16     | +       | 32    | 16      | 17      | +        | 1085.2959                  | 48.9                  | 6                          | I                      |
| 39   | 1      | 39     | +       | 40    | 1       | 40      | +        | 1085.2959                  | 48.9                  | -1                         | I                      |
| 39   | 1      | 39     | —       | 40    | 1       | 40      | —        | 1085.2959                  | 48.9                  | 0                          | I                      |
| 35   | 6      | 30     | —       | 36    | 6       | 31      | —        | 1085.3086                  | 58.8                  | 5                          | I                      |
| 35   | 6      | 30     | +       | 36    | 6       | 31      | +        | 1085.3086                  | 58.8                  | -4                         | I                      |
| 34   | 10     | 24     | +       | 35    | 10      | 25      | +        | 1085.3123                  | 78.5                  | -2                         | I                      |
| 34   | 10     | 24     | —       | 35    | 10      | 25      | —        | 1085.3161                  | 80.5                  | 0                          | I                      |
| 28   | 20     | 8      | +       | 29    | 20      | 9       | +        | 1085.3511                  | 69.0                  | 0                          | II                     |
| 28   | 20     | 8      | —       | 29    | 20      | 9       | —        | 1085.3804                  | 69.4                  | 0                          | II                     |
| 32   | 14     | 18     | +       | 33    | 14      | 19      | +        | 1085.4314                  | 89.3                  | 0                          | I                      |
| 33   | 12     | 22     | +       | 34    | 12      | 23      | +        | 1085.4401                  | 84.3                  | 1                          | I                      |
| 32   | 14     | 18     | —       | 33    | 14      | 19      | —        | 1085.4417                  | 87.3                  | -3                         | I                      |
| 33   | 12     | 22     | —       | 34    | 12      | 23      | —        | 1085.4467                  | 84.8                  | 0                          | I                      |
| 27   | 21     | 7      | +       | 28    | 21      | 8       | +        | 1085.4588                  | 70.7                  | 3                          | II                     |
| 35   | 5      | 31     | +       | 36    | 5       | 32      | +        | 1085.5114                  | 54.8                  | -4                         | I                      |
| 35   | 5      | 31     | —       | 36    | 5       | 32      | —        | 1085.5114                  | 54.8                  | 3                          | I                      |
| 30   | 17     | 13     | +       | 31    | 17      | 14      | +        | 1085.5335                  | 39.9                  | 1                          | II                     |
| 30   | 17     | 13     | —       | 31    | 17      | 14      | —        | 1085.5521                  | 41.4                  | 0                          | II                     |
| 34   | 9      | 25     | +       | 35    | 9       | 26      | +        | 1085.5572                  | 77.3                  | 2                          | I                      |
| 34   | 9      | 25     | —       | 35    | 9       | 26      | —        | 1085.5592                  | 76.3                  | 0                          | I                      |
| 26   | 22     | 4      | —       | 27    | 22      | 5       | —        | 1085.5720                  | 79.5                  | 2                          | II                     |
| 24   | 24     | 0      | +       | 25    | 24      | 1       | +        | 1085.5777                  | 90.7                  | -3                         | II                     |
| 24   | 24     | 0      | —       | 25    | 24      | 1       | —        | 1085.6316                  | 92.6                  | 7                          | II                     |
| 34   | 4      | 30     | —       | 35    | 4       | 31      | —        | 1085.7119                  | 73.2                  | -11                        | I                      |
| 34   | 4      | 30     | +       | 35    | 4       | 31      | +        | 1085.7165                  | 68.0                  | -1                         | I                      |
| 31   | 15     | 17     | —       | 32    | 15      | 18      | —        | 1085.7473                  | 57.6                  | -1                         | I                      |
| 34   | 5      | 29     | —       | 35    | 5       | 30      | —        | 1085.7473                  | 57.6                  | -3                         | I                      |
| 34   | 5      | 29     | +       | 35    | 5       | 30      | +        | 1085.7517                  | 66.7                  | -1                         | I                      |
| 33   | 11     | 23     | +       | 34    | 11      | 24      | +        | 1085.7553                  | 77.5                  | 0                          | I                      |
| 34   | 8      | 26     | +       | 35    | 8       | 27      | +        | 1085.7609                  | 55.2                  | 1                          | I                      |
| 33   | 11     | 23     | —       | 34    | 11      | 24      | —        | 1085.7609                  | 55.2                  | 4                          | I                      |
| 34   | 8      | 26     | —       | 35    | 8       | 27      | —        | 1085.7609                  | 55.2                  | -9                         | I                      |
| 32   | 13     | 19     | +       | 33    | 13      | 20      | +        | 1085.8100                  | 87.1                  | 1                          | I                      |
| 32   | 13     | 19     | —       | 33    | 13      | 20      | —        | 1085.8188                  | 88.1                  | -1                         | I                      |
| 36   | 2      | 34     | +       | 37    | 2       | 35      | +        | 1085.8356                  | 62.5                  | 3                          | I                      |
| 36   | 2      | 34     | —       | 37    | 2       | 35      | —        | 1085.8356                  | 62.5                  | -6                         | I                      |
| 37   | 2      | 36     | +       | 38    | 2       | 37      | +        | 1085.9027                  | 53.2                  | 0                          | I                      |
| 37   | 2      | 36     | —       | 38    | 2       | 37      | —        | 1085.9027                  | 53.2                  | 0                          | I                      |
| 34   | 7      | 27     | —       | 35    | 7       | 28      | —        | 1085.9103                  | 56.7                  | 2                          | I                      |
| 34   | 7      | 27     | +       | 35    | 7       | 28      | +        | 1085.9103                  | 56.7                  | -2                         | I                      |
| 35   | 4      | 32     | +       | 36    | 4       | 33      | +        | 1085.9250                  | 54.0                  | 0                          | I                      |
| 35   | 4      | 32     | —       | 36    | 4       | 33      | —        | 1085.9250                  | 54.0                  | -2                         | I                      |
| 34   | 6      | 28     | —       | 35    | 6       | 29      | —        | 1085.9459                  | 70.0                  | 3                          | I                      |
| 34   | 6      | 28     | +       | 35    | 6       | 29      | +        | 1085.9477                  | 69.5                  | -3                         | I                      |
| 38   | 0      | 38     | +       | 39    | 0       | 39      | +        | 1085.9636                  | 49.1                  | -1                         | I                      |
| 38   | 0      | 38     | —       | 39    | 0       | 39      | —        | 1085.9636                  | 49.1                  | 0                          | I                      |
| 30   | 16     | 14     | +       | 31    | 16      | 15      | +        | 1086.0024                  | 32.6                  | 0                          | II                     |
| 30   | 16     | 14     | —       | 31    | 16      | 15      | —        | 1086.0186                  | 33.9                  | 0                          | II                     |
| 33   | 10     | 24     | +       | 34    | 10      | 25      | +        | 1086.0377                  | 80.2                  | 0                          | I                      |
| 33   | 10     | 24     | —       | 34    | 10      | 25      | —        | 1086.0415                  | 80.2                  | 0                          | I                      |
| 27   | 20     | 8      | +       | 28    | 20      | 9       | +        | 1086.0453                  | 67.4                  | 0                          | II                     |
| 27   | 20     | 8      | —       | 28    | 20      | 9       | —        | 1086.0763                  | 69.5                  | 0                          | II                     |
| 31   | 14     | 18     | +       | 32    | 14      | 19      | +        | 1086.1436                  | 89.3                  | 0                          | I                      |



| $N'$ | $K'_a$ | $K'_c$ | $J'^a)$ | $N''$ | $K''_a$ | $K''_c$ | $J''^b)$ | $\nu$ , exp. <sup>c)</sup> | Transm. <sup>d)</sup> | $\delta_\nu$ <sup>e)</sup> | Spectrum <sup>f)</sup> |
|------|--------|--------|---------|-------|---------|---------|----------|----------------------------|-----------------------|----------------------------|------------------------|
|      |        | 1      |         |       |         | 2       |          | 3                          | 4                     | 5                          | 6                      |
| 26   | 21     | 5      | +       | 27    | 21      | 6       | +        | 1086.1487                  | 75.5                  | 0                          | II                     |
| 31   | 14     | 18     | -       | 32    | 14      | 19      | -        | 1086.1550                  | 88.5                  | 1                          | I                      |
| 32   | 12     | 20     | +       | 33    | 12      | 21      | +        | 1086.1580                  | 84.5                  | -1                         | I                      |
| 32   | 12     | 20     | -       | 33    | 12      | 21      | -        | 1086.1652                  | 85.1                  | 0                          | I                      |
| 26   | 21     | 5      | -       | 27    | 21      | 6       | -        | 1086.1852                  | 74.8                  | 2                          | II                     |
| 29   | 17     | 13     | +       | 30    | 17      | 14      | +        | 1086.2366                  | 93.1                  | 0                          | I                      |
| 29   | 17     | 13     | -       | 30    | 17      | 14      | -        | 1086.2563                  | 77.3                  | 2                          | I                      |
| 24   | 23     | 1      | +       | 25    | 23      | 2       | +        | 1086.2563                  | 77.3                  | 16                         | I                      |
| 33   | 9      | 25     | +       | 34    | 9       | 26      | +        | 1086.2848                  | 72.0                  | -2                         | I                      |
| 33   | 9      | 25     | -       | 34    | 9       | 26      | -        | 1086.2873                  | 76.4                  | -1                         | I                      |
| 34   | 3      | 31     | +       | 35    | 3       | 32      | +        | 1086.3160                  | 66.0                  | -1                         | I                      |
| 34   | 3      | 31     | -       | 35    | 3       | 32      | -        | 1086.3181                  | 65.8                  | 2                          | I                      |
| 28   | 18     | 10     | +       | 29    | 18      | 11      | +        | 1086.4364                  | 37.2                  | -3                         | II                     |
| 30   | 15     | 15     | +       | 31    | 15      | 16      | +        | 1086.4419                  | 18.2                  | -2                         | II                     |
| 30   | 15     | 15     | -       | 31    | 15      | 16      | -        | 1086.4561                  | 23.5                  | -1                         | II                     |
| 28   | 18     | 10     | -       | 29    | 18      | 11      | -        | 1086.4598                  | 27.8                  | -5                         | II                     |
| 32   | 11     | 21     | +       | 33    | 11      | 22      | +        | 1086.4749                  | 82.0                  | -1                         | I                      |
| 32   | 11     | 21     | -       | 33    | 11      | 22      | -        | 1086.4805                  | 82.5                  | 0                          | I                      |
| 33   | 8      | 26     | +       | 34    | 8       | 27      | +        | 1086.4936                  | 62.5                  | 4                          | I                      |
| 33   | 8      | 26     | -       | 34    | 8       | 27      | -        | 1086.4936                  | 62.5                  | -7                         | I                      |
| 31   | 13     | 19     | +       | 32    | 13      | 20      | +        | 1086.5233                  | 86.7                  | -1                         | I                      |
| 31   | 13     | 19     | -       | 32    | 13      | 20      | -        | 1086.5328                  | 85.9                  | 1                          | I                      |
| 35   | 3      | 33     | +       | 36    | 3       | 34      | +        | 1086.5385                  | 54.9                  | 2                          | I                      |
| 35   | 3      | 33     | -       | 36    | 3       | 34      | -        | 1086.5385                  | 54.9                  | -2                         | I                      |
| 36   | 1      | 35     | +       | 37    | 1       | 36      | +        | 1086.5675                  | 49.5                  | -1                         | I                      |
| 36   | 1      | 35     | -       | 37    | 1       | 36      | -        | 1086.5675                  | 49.5                  | -2                         | I                      |
| 27   | 19     | 9      | +       | 28    | 19      | 10      | +        | 1086.6035                  | 57.7                  | 0                          | II                     |
| 37   | 1      | 37     | +       | 38    | 1       | 38      | +        | 1086.6286                  | 46.8                  | -1                         | I                      |
| 37   | 1      | 37     | -       | 38    | 1       | 38      | -        | 1086.6286                  | 46.8                  | 0                          | I                      |
| 33   | 7      | 27     | -       | 34    | 7       | 28      | -        | 1086.6570                  | 55.7                  | 0                          | I                      |
| 33   | 7      | 27     | +       | 34    | 7       | 28      | +        | 1086.6570                  | 55.7                  | 0                          | I                      |
| 29   | 16     | 14     | +       | 30    | 16      | 15      | +        | 1086.7064                  | 92.6                  | 1                          | I                      |
| 29   | 16     | 14     | -       | 30    | 16      | 15      | -        | 1086.7236                  | 92.3                  | 1                          | I                      |
| 26   | 20     | 6      | +       | 27    | 20      | 7       | +        | 1086.7365                  | 69.1                  | 0                          | II                     |
| 32   | 10     | 22     | +       | 33    | 10      | 23      | +        | 1086.7593                  | 76.5                  | -1                         | I                      |
| 32   | 10     | 22     | -       | 33    | 10      | 23      | -        | 1086.7635                  | 62.2                  | 0                          | I                      |
| 26   | 20     | 6      | -       | 27    | 20      | 7       | -        | 1086.7696                  | 48.0                  | 2                          | II                     |
| 33   | 6      | 28     | -       | 34    | 6       | 29      | -        | 1086.7837                  | 71.1                  | 1                          | I                      |
| 33   | 6      | 28     | +       | 34    | 6       | 29      | +        | 1086.7875                  | 76.3                  | 6                          | I                      |
| 25   | 21     | 5      | +       | 26    | 21      | 6       | +        | 1086.8361                  | 78.9                  | 0                          | II                     |
| 30   | 14     | 16     | +       | 31    | 14      | 17      | +        | 1086.8526                  | 87.4                  | -1                         | I                      |
| 30   | 14     | 16     | -       | 31    | 14      | 17      | -        | 1086.8645                  | 89.6                  | -1                         | I                      |
| 31   | 12     | 20     | +       | 32    | 12      | 21      | +        | 1086.8729                  | 79.9                  | 1                          | I                      |
| 31   | 12     | 20     | -       | 32    | 12      | 21      | -        | 1086.8807                  | 79.7                  | 3                          | I                      |
| 24   | 22     | 2      | +       | 25    | 22      | 3       | +        | 1086.9022                  | 86.5                  | 2                          | II                     |
| 28   | 17     | 11     | +       | 29    | 17      | 12      | +        | 1086.9364                  | 92.9                  | 1                          | I                      |
| 24   | 22     | 2      | -       | 25    | 22      | 3       | -        | 1086.9468                  | 12.2                  | -2                         | II                     |
| 33   | 5      | 29     | +       | 34    | 5       | 30      | +        | 1086.9518                  | 50.6                  | -5                         | I                      |
| 33   | 5      | 29     | -       | 34    | 5       | 30      | -        | 1086.9518                  | 50.6                  | 4                          | I                      |
| 28   | 17     | 11     | -       | 29    | 17      | 12      | -        | 1086.9572                  | 92.6                  | 0                          | II                     |
| 32   | 9      | 23     | +       | 33    | 9       | 24      | +        | 1087.0092                  | 75.0                  | 0                          | I                      |
| 32   | 9      | 23     | -       | 33    | 9       | 24      | -        | 1087.0118                  | 74.8                  | 0                          | I                      |
| 29   | 15     | 15     | +       | 30    | 15      | 16      | +        | 1087.1471                  | 89.7                  | 1                          | I                      |
| 34   | 2      | 32     | -       | 35    | 2       | 33      | -        | 1087.1571                  | 57.6                  | 1                          | I                      |
| 34   | 2      | 32     | +       | 35    | 2       | 33      | +        | 1087.1571                  | 57.6                  | 11                         | I                      |
| 27   | 18     | 10     | -       | 28    | 18      | 11      | -        | 1087.1571                  | 57.6                  | -8                         | I                      |
| 32   | 4      | 28     | -       | 33    | 4       | 29      | -        | 1087.1872                  | 63.4                  | 2                          | I                      |
| 32   | 4      | 28     | +       | 33    | 4       | 29      | +        | 1087.1893                  | 60.6                  | 0                          | I                      |
| 31   | 11     | 21     | -       | 32    | 11      | 22      | -        | 1087.1972                  | 81.3                  | 1                          | I                      |
| 32   | 8      | 24     | -       | 33    | 8       | 25      | -        | 1087.2207                  | 62.2                  | -10                        | I                      |
| 32   | 8      | 24     | +       | 33    | 8       | 25      | +        | 1087.2207                  | 62.2                  | 3                          | I                      |
| 35   | 2      | 34     | +       | 36    | 2       | 35      | +        | 1087.2336                  | 42.7                  | 0                          | I                      |
| 30   | 13     | 17     | +       | 31    | 13      | 18      | +        | 1087.2336                  | 42.7                  | 1                          | I                      |
| 35   | 2      | 34     | -       | 36    | 2       | 35      | -        | 1087.2336                  | 42.7                  | -1                         | I                      |
| 30   | 13     | 17     | -       | 31    | 13      | 18      | -        | 1087.2434                  | 86.3                  | -1                         | I                      |
| 36   | 0      | 36     | +       | 37    | 0       | 37      | +        | 1087.2907                  | 44.2                  | -1                         | I                      |
| 36   | 0      | 36     | -       | 37    | 0       | 37      | -        | 1087.2907                  | 44.2                  | 0                          | I                      |
| 33   | 4      | 30     | +       | 34    | 4       | 31      | +        | 1087.3045                  | 48.3                  | -1                         | I                      |
| 33   | 4      | 30     | -       | 34    | 4       | 31      | -        | 1087.3045                  | 48.3                  | 0                          | I                      |
| 32   | 5      | 27     | -       | 33    | 5       | 28      | -        | 1087.3240                  | 65.8                  | 1                          | I                      |
| 32   | 5      | 27     | +       | 33    | 5       | 28      | +        | 1087.3281                  | 66.8                  | 0                          | I                      |
| 32   | 7      | 25     | +       | 33    | 7       | 26      | +        | 1087.3840                  | 50.3                  | 0                          | I                      |

| $N'$ | $K'_a$ | $K'_c$ | $J'^a)$ | $N''$ | $K''_a$ | $K''_c$ | $J''^b)$ | $\nu$ , exp. <sup>c)</sup> | Transm. <sup>d)</sup> | $\delta_\nu$ <sup>e)</sup> | Spectrum <sup>f)</sup> |
|------|--------|--------|---------|-------|---------|---------|----------|----------------------------|-----------------------|----------------------------|------------------------|
|      |        | 1      |         |       |         | 2       |          | 3                          | 4                     | 5                          | 6                      |
| 32   | 7      | 25     | —       | 33    | 7       | 26      | —        | 1087.3840                  | 50.3                  | 0                          | I                      |
| 28   | 16     | 12     | +       | 29    | 16      | 13      | +        | 1087.4070                  | 86.0                  | -1                         | I                      |
| 32   | 6      | 26     | +       | 33    | 6       | 27      | +        | 1087.4604                  | 59.4                  | -10                        | I                      |
| 32   | 6      | 26     | —       | 33    | 6       | 27      | —        | 1087.4604                  | 59.4                  | 7                          | I                      |
| 31   | 10     | 22     | +       | 32    | 10      | 23      | +        | 1087.4774                  | 77.8                  | 0                          | I                      |
| 31   | 10     | 22     | —       | 32    | 10      | 23      | —        | 1087.4819                  | 78.4                  | 0                          | I                      |
| 24   | 21     | 3      | +       | 25    | 21      | 4       | +        | 1087.5205                  | 82.1                  | 1                          | II                     |
| 29   | 14     | 16     | +       | 30    | 14      | 17      | +        | 1087.5584                  | 87.6                  | 0                          | I                      |
| 29   | 14     | 16     | —       | 30    | 14      | 17      | —        | 1087.5712                  | 85.2                  | 1                          | I                      |
| 30   | 12     | 18     | +       | 31    | 12      | 19      | +        | 1087.5840                  | 81.8                  | -2                         | I                      |
| 23   | 22     | 2      | +       | 24    | 22      | 3       | +        | 1087.5840                  | 81.8                  | 14                         | I                      |
| 30   | 12     | 18     | —       | 31    | 12      | 19      | —        | 1087.5920                  | 71.1                  | -2                         | I                      |
| 41   | 2      | 40     | +       | 41    | 2       | 39      | +        | 1087.6073                  | 91.7                  | 9                          | I                      |
| 32   | 3      | 29     | —       | 33    | 3       | 30      | —        | 1087.6319                  | 54.6                  | -7                         | I                      |
| 27   | 17     | 11     | +       | 28    | 17      | 12      | +        | 1087.6319                  | 54.6                  | -13                        | I                      |
| 32   | 3      | 29     | +       | 33    | 3       | 30      | +        | 1087.6319                  | 54.6                  | 8                          | I                      |
| 27   | 17     | 11     | —       | 28    | 17      | 12      | —        | 1087.6554                  | 93.3                  | 0                          | I                      |
| 31   | 9      | 23     | +       | 32    | 9       | 24      | +        | 1087.7296                  | 59.7                  | 0                          | I                      |
| 31   | 9      | 23     | —       | 32    | 9       | 24      | —        | 1087.7319                  | 65.3                  | -6                         | I                      |
| 26   | 18     | 8      | +       | 27    | 18      | 9       | +        | 1087.8254                  | 92.9                  | -2                         | I                      |
| 28   | 15     | 13     | +       | 29    | 15      | 14      | +        | 1087.8487                  | 89.5                  | 0                          | I                      |
| 26   | 18     | 8      | —       | 27    | 18      | 9       | —        | 1087.8520                  | 95.1                  | -1                         | I                      |
| 28   | 15     | 13     | —       | 29    | 15      | 14      | —        | 1087.8644                  | 90.4                  | 0                          | I                      |
| 33   | 3      | 31     | —       | 34    | 3       | 32      | —        | 1087.8754                  | 48.9                  | -2                         | I                      |
| 33   | 3      | 31     | +       | 34    | 3       | 32      | +        | 1087.8754                  | 48.9                  | 2                          | I                      |
| 34   | 1      | 33     | —       | 35    | 1       | 34      | —        | 1087.8916                  | 44.6                  | -2                         | I                      |
| 34   | 1      | 33     | +       | 35    | 1       | 34      | +        | 1087.8916                  | 44.6                  | 0                          | I                      |
| 30   | 11     | 19     | +       | 31    | 11      | 20      | +        | 1087.9040                  | 80.0                  | 0                          | I                      |
| 30   | 11     | 19     | —       | 31    | 11      | 20      | —        | 1087.9104                  | 80.3                  | 0                          | I                      |
| 44   | 4      | 40     | +       | 44    | 6       | 39      | +        | 1087.9262                  | 96.8                  | 1                          | I                      |
| 29   | 13     | 17     | +       | 30    | 13      | 18      | +        | 1087.9404                  | 84.5                  | 0                          | I                      |
| 31   | 8      | 24     | —       | 32    | 8       | 25      | —        | 1087.9450                  | 61.2                  | -9                         | I                      |
| 31   | 8      | 24     | +       | 32    | 8       | 25      | +        | 1087.9450                  | 61.2                  | 6                          | I                      |
| 35   | 1      | 35     | +       | 36    | 1       | 36      | +        | 1087.9503                  | 37.6                  | 0                          | I                      |
| 29   | 13     | 17     | —       | 30    | 13      | 18      | —        | 1087.9503                  | 37.6                  | -7                         | I                      |
| 35   | 1      | 35     | —       | 36    | 1       | 36      | —        | 1087.9503                  | 37.6                  | 1                          | I                      |
| 25   | 19     | 7      | +       | 26    | 19      | 8       | +        | 1087.9845                  | 62.7                  | 0                          | II                     |
| 25   | 19     | 7      | —       | 26    | 19      | 8       | —        | 1088.0160                  | 64.9                  | 0                          | II                     |
| 47   | 4      | 44     | +       | 47    | 4       | 43      | +        | 1088.0769                  | 94.8                  | 4                          | I                      |
| 27   | 16     | 12     | +       | 28    | 16      | 13      | +        | 1088.1047                  | 91.0                  | 1                          | I                      |
| 24   | 20     | 4      | +       | 25    | 20      | 5       | +        | 1088.1100                  | 71.0                  | 1                          | II                     |
| 31   | 7      | 25     | +       | 32    | 7       | 26      | +        | 1088.1171                  | 51.8                  | 1                          | I                      |
| 31   | 7      | 25     | —       | 32    | 7       | 26      | —        | 1088.1171                  | 51.8                  | -1                         | I                      |
| 24   | 20     | 4      | —       | 25    | 20      | 5       | —        | 1088.1473                  | 66.9                  | 1                          | II                     |
| 30   | 10     | 20     | +       | 31    | 10      | 21      | +        | 1088.1919                  | 76.8                  | -1                         | I                      |
| 30   | 10     | 20     | —       | 31    | 10      | 21      | —        | 1088.1968                  | 77.3                  | 1                          | I                      |
| 23   | 21     | 3      | —       | 24    | 21      | 4       | —        | 1088.2480                  | 47.7                  | 23                         | I                      |
| 31   | 6      | 26     | +       | 32    | 6       | 27      | +        | 1088.2480                  | 47.7                  | -4                         | I                      |
| 31   | 6      | 26     | —       | 32    | 6       | 27      | —        | 1088.2480                  | 47.7                  | 4                          | I                      |
| 28   | 14     | 14     | +       | 29    | 14      | 15      | +        | 1088.2609                  | 71.8                  | -2                         | I                      |
| 28   | 14     | 14     | —       | 29    | 14      | 15      | —        | 1088.2747                  | 84.6                  | 2                          | I                      |
| 29   | 12     | 18     | +       | 30    | 12      | 19      | +        | 1088.2921                  | 81.7                  | -1                         | I                      |
| 29   | 12     | 18     | —       | 30    | 12      | 19      | —        | 1088.3008                  | 76.8                  | -1                         | I                      |
| 22   | 22     | 0      | —       | 23    | 22      | 1       | —        | 1088.3119                  | 90.1                  | 5                          | II                     |
| 26   | 17     | 9      | +       | 27    | 17      | 10      | +        | 1088.3268                  | 93.3                  | 0                          | I                      |
| 26   | 17     | 9      | —       | 27    | 17      | 10      | —        | 1088.3497                  | 73.5                  | -7                         | I                      |
| 31   | 5      | 27     | +       | 32    | 5       | 28      | +        | 1088.3907                  | 47.1                  | -5                         | I                      |
| 31   | 5      | 27     | —       | 32    | 5       | 28      | —        | 1088.3907                  | 47.1                  | 6                          | I                      |
| 30   | 9      | 21     | +       | 31    | 9       | 22      | +        | 1088.4463                  | 73.2                  | 0                          | I                      |
| 30   | 9      | 21     | —       | 31    | 9       | 22      | —        | 1088.4496                  | 73.1                  | 1                          | I                      |
| 32   | 2      | 30     | —       | 33    | 2       | 31      | —        | 1088.4600                  | 55.8                  | -13                        | I                      |
| 32   | 2      | 30     | +       | 33    | 2       | 31      | +        | 1088.4600                  | 55.8                  | 0                          | I                      |
| 25   | 18     | 8      | +       | 26    | 18      | 9       | +        | 1088.5154                  | 48.7                  | 0                          | II                     |
| 25   | 18     | 8      | —       | 26    | 18      | 9       | —        | 1088.5436                  | 43.7                  | 1                          | I                      |
| 27   | 15     | 13     | +       | 28    | 15      | 14      | +        | 1088.5474                  | 80.9                  | 3                          | I                      |
| 33   | 2      | 32     | —       | 34    | 2       | 33      | —        | 1088.5539                  | 44.3                  | -1                         | I                      |
| 33   | 2      | 32     | +       | 34    | 2       | 33      | +        | 1088.5539                  | 44.3                  | 1                          | I                      |
| 27   | 15     | 13     | —       | 28    | 15      | 14      | —        | 1088.5644                  | 80.8                  | 5                          | I                      |
| 34   | 0      | 34     | —       | 35    | 0       | 35      | —        | 1088.6068                  | 39.0                  | 0                          | I                      |
| 34   | 0      | 34     | +       | 35    | 0       | 35      | +        | 1088.6068                  | 39.0                  | -1                         | I                      |
| 29   | 11     | 19     | +       | 30    | 11      | 20      | +        | 1088.6133                  | 78.3                  | -1                         | I                      |
| 29   | 11     | 19     | —       | 30    | 11      | 20      | —        | 1088.6202                  | 80.0                  | 0                          | I                      |

| $N'$ | $K'_a$ | $K'_c$ | $J'^a)$ | $N''$ | $K''_a$ | $K''_c$ | $J''^b)$ | $\nu$ , exp. <sup>c)</sup> | Transm. <sup>d)</sup> | $\delta_\nu$ <sup>e)</sup> | Spectrum <sup>f)</sup> |
|------|--------|--------|---------|-------|---------|---------|----------|----------------------------|-----------------------|----------------------------|------------------------|
|      |        | 1      |         |       |         | 2       |          | 3                          | 4                     | 5                          | 6                      |
| 28   | 13     | 15     | —       | 29    | 13      | 16      | —        | 1088.6552                  | 83.4                  | 0                          | II                     |
| 30   | 8      | 22     | —       | 31    | 8       | 23      | —        | 1088.6644                  | 65.6                  | -15                        | I                      |
| 30   | 8      | 22     | +       | 31    | 8       | 23      | +        | 1088.6644                  | 65.6                  | 3                          | I                      |
| 24   | 19     | 5      | +       | 25    | 19      | 6       | +        | 1088.6705                  | 57.3                  | 0                          | II                     |
| 31   | 4      | 28     | —       | 32    | 4       | 29      | —        | 1088.6848                  | 32.8                  | 3                          | I                      |
| 31   | 4      | 28     | +       | 32    | 4       | 29      | +        | 1088.6848                  | 32.8                  | 0                          | I                      |
| 30   | 4      | 26     | +       | 31    | 4       | 27      | +        | 1088.6848                  | 32.8                  | -13                        | I                      |
| 24   | 19     | 5      | —       | 25    | 19      | 6       | —        | 1088.7040                  | 57.2                  | -1                         | II                     |
| 23   | 20     | 4      | +       | 24    | 20      | 5       | +        | 1088.7922                  | 77.5                  | 1                          | II                     |
| 26   | 16     | 10     | +       | 27    | 16      | 11      | +        | 1088.7992                  | 90.8                  | 0                          | I                      |
| 26   | 16     | 10     | —       | 27    | 16      | 11      | —        | 1088.8198                  | 92.3                  | -1                         | I                      |
| 23   | 20     | 4      | —       | 24    | 20      | 5       | —        | 1088.8320                  | 73.9                  | 1                          | II                     |
| 30   | 7      | 23     | —       | 31    | 7       | 24      | —        | 1088.8388                  | 50.5                  | -2                         | I                      |
| 30   | 7      | 23     | +       | 31    | 7       | 24      | +        | 1088.8388                  | 50.5                  | 2                          | I                      |
| 30   | 5      | 25     | —       | 31    | 5       | 26      | —        | 1088.8770                  | 63.5                  | 0                          | I                      |
| 22   | 21     | 1      | +       | 23    | 21      | 2       | +        | 1088.8806                  | 62.4                  | 4                          | I                      |
| 30   | 5      | 25     | +       | 31    | 5       | 26      | +        | 1088.8806                  | 62.4                  | -1                         | I                      |
| 29   | 10     | 20     | +       | 30    | 10      | 21      | +        | 1088.9029                  | 75.2                  | -1                         | I                      |
| 29   | 10     | 20     | —       | 30    | 10      | 21      | —        | 1088.9081                  | 75.8                  | 0                          | I                      |
| 22   | 21     | 1      | —       | 23    | 21      | 2       | —        | 1088.9265                  | 77.8                  | -6                         | II                     |
| 30   | 6      | 24     | +       | 31    | 6       | 25      | +        | 1088.9444                  | 49.9                  | -6                         | I                      |
| 30   | 6      | 24     | —       | 31    | 6       | 25      | —        | 1088.9444                  | 49.9                  | 6                          | I                      |
| 27   | 14     | 14     | +       | 28    | 14      | 15      | +        | 1088.9605                  | 85.1                  | 1                          | I                      |
| 30   | 3      | 27     | —       | 31    | 3       | 28      | —        | 1088.9646                  | 40.9                  | -3                         | I                      |
| 30   | 3      | 27     | +       | 31    | 3       | 28      | +        | 1088.9646                  | 40.9                  | 2                          | I                      |
| 39   | 2      | 38     | —       | 39    | 2       | 37      | —        | 1088.9646                  | 40.9                  | 1                          | I                      |
| 27   | 14     | 14     | —       | 28    | 14      | 15      | —        | 1088.9745                  | 85.4                  | -3                         | I                      |
| 28   | 12     | 16     | +       | 29    | 12      | 17      | +        | 1088.9969                  | 82.2                  | 0                          | I                      |
| 25   | 17     | 9      | +       | 26    | 17      | 10      | +        | 1089.0174                  | 93.2                  | 0                          | I                      |
| 25   | 17     | 9      | —       | 26    | 17      | 10      | —        | 1089.0418                  | 88.6                  | -7                         | I                      |
| 29   | 9      | 21     | +       | 30    | 9       | 22      | +        | 1089.1594                  | 71.8                  | 0                          | I                      |
| 29   | 9      | 21     | —       | 30    | 9       | 22      | —        | 1089.1634                  | 55.5                  | 4                          | I                      |
| 31   | 3      | 29     | —       | 32    | 3       | 30      | —        | 1089.2048                  | 27.4                  | -11                        | I                      |
| 32   | 1      | 31     | +       | 33    | 1       | 32      | +        | 1089.2048                  | 27.4                  | 10                         | I                      |
| 31   | 3      | 29     | +       | 32    | 3       | 30      | +        | 1089.2048                  | 27.4                  | -8                         | I                      |
| 32   | 1      | 31     | —       | 33    | 1       | 32      | —        | 1089.2048                  | 27.4                  | 8                          | I                      |
| 24   | 18     | 6      | —       | 25    | 18      | 7       | —        | 1089.2323                  | 49.5                  | 1                          | II                     |
| 26   | 15     | 11     | +       | 27    | 15      | 12      | +        | 1089.2422                  | 78.8                  | -3                         | I                      |
| 33   | 1      | 33     | +       | 34    | 1       | 34      | +        | 1089.2607                  | 34.2                  | -1                         | I                      |
| 33   | 1      | 33     | —       | 34    | 1       | 34      | —        | 1089.2607                  | 34.2                  | 0                          | I                      |
| 26   | 15     | 11     | —       | 27    | 15      | 12      | —        | 1089.2607                  | 34.2                  | 3                          | I                      |
| 28   | 11     | 17     | —       | 29    | 11      | 18      | —        | 1089.3266                  | 78.5                  | 0                          | I                      |
| 27   | 13     | 15     | +       | 28    | 13      | 16      | +        | 1089.3442                  | 84.5                  | 0                          | I                      |
| 23   | 19     | 5      | +       | 24    | 19      | 6       | +        | 1089.3536                  | 64.9                  | 2                          | II                     |
| 27   | 13     | 15     | —       | 28    | 13      | 16      | —        | 1089.3562                  | 85.2                  | 0                          | I                      |
| 29   | 8      | 22     | +       | 30    | 8       | 23      | +        | 1089.3802                  | 66.3                  | 1                          | I                      |
| 29   | 8      | 22     | —       | 30    | 8       | 23      | —        | 1089.3820                  | 67.5                  | -1                         | I                      |
| 23   | 19     | 5      | —       | 24    | 19      | 6       | —        | 1089.3898                  | 85.9                  | 4                          | I                      |
| 22   | 20     | 2      | +       | 23    | 20      | 3       | +        | 1089.4712                  | 79.2                  | 0                          | II                     |
| 25   | 16     | 10     | +       | 26    | 16      | 11      | +        | 1089.4905                  | 29.1                  | 1                          | II                     |
| 22   | 20     | 2      | —       | 23    | 20      | 3       | —        | 1089.5125                  | 27.1                  | -14                        | II                     |
| 25   | 16     | 10     | —       | 26    | 16      | 11      | —        | 1089.5125                  | 27.1                  | 2                          | II                     |
| 29   | 7      | 23     | +       | 30    | 7       | 24      | +        | 1089.5610                  | 50.0                  | 3                          | I                      |
| 29   | 7      | 23     | —       | 30    | 7       | 24      | —        | 1089.5610                  | 50.0                  | -4                         | I                      |
| 28   | 10     | 18     | +       | 29    | 10      | 19      | +        | 1089.6104                  | 72.7                  | -1                         | I                      |
| 28   | 10     | 18     | —       | 29    | 10      | 19      | —        | 1089.6160                  | 74.7                  | 0                          | I                      |
| 26   | 14     | 12     | +       | 27    | 14      | 13      | +        | 1089.6568                  | 83.5                  | 2                          | I                      |
| 26   | 14     | 12     | —       | 27    | 14      | 13      | —        | 1089.6719                  | 87.5                  | 0                          | I                      |
| 29   | 6      | 24     | —       | 30    | 6       | 25      | —        | 1089.6982                  | 37.4                  | 3                          | I                      |
| 27   | 12     | 16     | +       | 28    | 12      | 17      | +        | 1089.6982                  | 37.4                  | 1                          | I                      |
| 29   | 6      | 24     | +       | 30    | 6       | 25      | +        | 1089.6982                  | 37.4                  | -3                         | I                      |
| 27   | 12     | 16     | —       | 28    | 12      | 17      | —        | 1089.7084                  | 77.8                  | 3                          | I                      |
| 24   | 17     | 7      | —       | 25    | 17      | 8       | —        | 1089.7318                  | 93.8                  | 1                          | I                      |
| 30   | 2      | 28     | —       | 31    | 2       | 29      | —        | 1089.7471                  | 54.5                  | -15                        | I                      |
| 30   | 2      | 28     | +       | 31    | 2       | 29      | +        | 1089.7471                  | 54.5                  | 1                          | I                      |
| 29   | 5      | 25     | —       | 30    | 5       | 26      | —        | 1089.8254                  | 40.0                  | 5                          | I                      |
| 29   | 5      | 25     | +       | 30    | 5       | 26      | +        | 1089.8254                  | 40.0                  | -6                         | I                      |
| 31   | 2      | 30     | —       | 32    | 2       | 31      | —        | 1089.8636                  | 39.5                  | -1                         | I                      |
| 31   | 2      | 30     | +       | 32    | 2       | 31      | +        | 1089.8636                  | 39.5                  | 1                          | I                      |
| 28   | 9      | 19     | +       | 29    | 9       | 20      | +        | 1089.8688                  | 70.2                  | -1                         | I                      |
| 28   | 9      | 19     | —       | 29    | 9       | 20      | —        | 1089.8727                  | 71.9                  | 0                          | I                      |
| 23   | 18     | 6      | +       | 24    | 18      | 7       | +        | 1089.8853                  | 30.4                  | -4                         | II                     |

| $N'$ | $K'_a$ | $K'_c$ | $J'^a)$ | $N''$ | $K''_a$ | $K''_c$ | $J''^b)$ | $\nu$ , exp. <sup>c)</sup> | Transm. <sup>d)</sup> | $\delta_\nu$ <sup>e)</sup> | Spectrum <sup>f)</sup> |
|------|--------|--------|---------|-------|---------|---------|----------|----------------------------|-----------------------|----------------------------|------------------------|
|      |        | 1      |         |       |         | 2       |          | 3                          | 4                     | 5                          | 6                      |
| 32   | 0      | 32     | +       | 33    | 0       | 33      | +        | 1089.9117                  | 36.3                  | -1                         | I                      |
| 32   | 0      | 32     | -       | 33    | 0       | 33      | -        | 1089.9117                  | 36.3                  | 0                          | I                      |
| 23   | 18     | 6      | -       | 24    | 18      | 7       | -        | 1089.9180                  | 52.9                  | 0                          | II                     |
| 25   | 15     | 11     | +       | 26    | 15      | 12      | +        | 1089.9345                  | 89.5                  | 0                          | I                      |
| 25   | 15     | 11     | -       | 26    | 15      | 12      | -        | 1089.9541                  | 54.0                  | 4                          | I                      |
| 27   | 11     | 17     | +       | 28    | 11      | 18      | +        | 1090.0218                  | 78.1                  | 0                          | I                      |
| 27   | 11     | 17     | -       | 28    | 11      | 18      | -        | 1090.0298                  | 77.9                  | 1                          | I                      |
| 22   | 19     | 3      | +       | 23    | 19      | 4       | +        | 1090.0333                  | 62.9                  | 1                          | II                     |
| 26   | 13     | 13     | +       | 27    | 13      | 14      | +        | 1090.0412                  | 83.0                  | -1                         | I                      |
| 26   | 13     | 13     | -       | 27    | 13      | 14      | -        | 1090.0538                  | 77.6                  | -3                         | I                      |
| 29   | 4      | 26     | +       | 30    | 4       | 27      | +        | 1090.0662                  | 38.5                  | -3                         | I                      |
| 29   | 4      | 26     | -       | 30    | 4       | 27      | -        | 1090.0662                  | 38.5                  | 3                          | I                      |
| 22   | 19     | 3      | -       | 23    | 19      | 4       | -        | 1090.0718                  | 60.8                  | 0                          | II                     |
| 28   | 8      | 20     | +       | 29    | 8       | 21      | +        | 1090.0922                  | 65.8                  | 1                          | I                      |
| 28   | 8      | 20     | -       | 29    | 8       | 21      | -        | 1090.0944                  | 67.5                  | 0                          | I                      |
| 24   | 16     | 8      | +       | 25    | 16      | 9       | +        | 1090.1787                  | 91.9                  | 1                          | I                      |
| 28   | 4      | 24     | -       | 29    | 4       | 25      | -        | 1090.1955                  | 58.7                  | 0                          | I                      |
| 24   | 16     | 8      | -       | 25    | 16      | 9       | -        | 1090.1995                  | 57.9                  | -28                        | I                      |
| 28   | 4      | 24     | +       | 29    | 4       | 25      | +        | 1090.1995                  | 57.9                  | 0                          | I                      |
| 28   | 7      | 21     | -       | 29    | 7       | 22      | -        | 1090.2758                  | 50.2                  | -5                         | I                      |
| 28   | 7      | 21     | +       | 29    | 7       | 22      | +        | 1090.2758                  | 50.2                  | 4                          | I                      |
| 27   | 10     | 18     | +       | 28    | 10      | 19      | +        | 1090.3143                  | 72.9                  | 0                          | I                      |
| 28   | 3      | 25     | +       | 29    | 3       | 26      | +        | 1090.3234                  | 39.6                  | -6                         | I                      |
| 28   | 3      | 25     | -       | 29    | 3       | 26      | -        | 1090.3234                  | 39.6                  | 2                          | I                      |
| 25   | 14     | 12     | +       | 26    | 14      | 13      | +        | 1090.3496                  | 86.8                  | 1                          | I                      |
| 23   | 17     | 7      | +       | 24    | 17      | 8       | +        | 1090.3891                  | 92.9                  | -1                         | I                      |
| 28   | 5      | 23     | -       | 29    | 5       | 24      | -        | 1090.3970                  | 51.7                  | -1                         | I                      |
| 28   | 5      | 23     | +       | 29    | 5       | 24      | +        | 1090.3970                  | 51.7                  | -30                        | I                      |
| 26   | 12     | 14     | +       | 27    | 12      | 15      | +        | 1090.3970                  | 51.7                  | 8                          | I                      |
| 28   | 6      | 22     | +       | 29    | 6       | 23      | +        | 1090.4024                  | 40.1                  | -4                         | I                      |
| 28   | 6      | 22     | -       | 29    | 6       | 23      | -        | 1090.4024                  | 40.1                  | 3                          | I                      |
| 26   | 12     | 14     | -       | 27    | 12      | 15      | -        | 1090.4067                  | 78.6                  | -1                         | I                      |
| 23   | 17     | 7      | -       | 24    | 17      | 8       | -        | 1090.4179                  | 94.0                  | 0                          | I                      |
| 30   | 1      | 29     | +       | 31    | 1       | 30      | +        | 1090.5038                  | 38.1                  | 2                          | I                      |
| 30   | 1      | 29     | -       | 31    | 1       | 30      | -        | 1090.5038                  | 38.1                  | -2                         | I                      |
| 29   | 3      | 27     | +       | 30    | 3       | 28      | +        | 1090.5316                  | 37.5                  | 1                          | I                      |
| 29   | 3      | 27     | -       | 30    | 3       | 28      | -        | 1090.5316                  | 37.5                  | -1                         | I                      |
| 31   | 1      | 31     | +       | 32    | 1       | 32      | +        | 1090.5602                  | 33.4                  | -1                         | I                      |
| 31   | 1      | 31     | -       | 32    | 1       | 32      | -        | 1090.5602                  | 33.4                  | 0                          | I                      |
| 22   | 18     | 4      | +       | 23    | 18      | 5       | +        | 1090.5663                  | 92.9                  | 0                          | I                      |
| 27   | 9      | 19     | +       | 28    | 9       | 20      | +        | 1090.5746                  | 68.0                  | 0                          | I                      |
| 27   | 9      | 19     | -       | 28    | 9       | 20      | -        | 1090.5789                  | 68.8                  | 0                          | I                      |
| 22   | 18     | 4      | -       | 23    | 18      | 5       | -        | 1090.6010                  | 95.6                  | 1                          | I                      |
| 24   | 15     | 9      | +       | 25    | 15      | 10      | +        | 1090.6235                  | 77.2                  | 1                          | I                      |
| 24   | 15     | 9      | -       | 25    | 15      | 10      | -        | 1090.6439                  | 90.4                  | -1                         | I                      |
| 21   | 19     | 3      | +       | 22    | 19      | 4       | +        | 1090.7100                  | 62.5                  | 1                          | II                     |
| 26   | 11     | 15     | +       | 27    | 11      | 16      | +        | 1090.7210                  | 77.1                  | 0                          | I                      |
| 26   | 11     | 15     | -       | 27    | 11      | 16      | -        | 1090.7295                  | 77.8                  | 1                          | I                      |
| 25   | 13     | 13     | +       | 26    | 13      | 14      | +        | 1090.7350                  | 84.0                  | 0                          | I                      |
| 25   | 13     | 13     | -       | 26    | 13      | 14      | -        | 1090.7495                  | 58.4                  | 7                          | I                      |
| 27   | 8      | 20     | +       | 28    | 8       | 21      | +        | 1090.8004                  | 66.0                  | 0                          | I                      |
| 27   | 8      | 20     | -       | 28    | 8       | 21      | -        | 1090.8031                  | 67.1                  | 1                          | I                      |
| 20   | 20     | 0      | +       | 21    | 20      | 1       | +        | 1090.8205                  | 95.9                  | 4                          | I                      |
| 23   | 16     | 8      | -       | 24    | 16      | 9       | -        | 1090.8889                  | 92.4                  | -1                         | I                      |
| 27   | 7      | 21     | +       | 28    | 7       | 22      | +        | 1090.9886                  | 51.3                  | 5                          | I                      |
| 27   | 7      | 21     | -       | 28    | 7       | 22      | -        | 1090.9886                  | 51.3                  | -6                         | I                      |
| 26   | 10     | 16     | +       | 27    | 10      | 17      | +        | 1091.0150                  | 70.7                  | 2                          | I                      |
| 28   | 2      | 26     | -       | 29    | 2       | 27      | -        | 1091.0210                  | 38.8                  | 2                          | I                      |
| 26   | 10     | 16     | -       | 27    | 10      | 17      | -        | 1091.0210                  | 38.8                  | -3                         | I                      |
| 24   | 14     | 10     | +       | 25    | 14      | 11      | +        | 1091.0391                  | 85.6                  | 0                          | I                      |
| 24   | 14     | 10     | -       | 25    | 14      | 11      | -        | 1091.0567                  | 86.4                  | 0                          | I                      |
| 22   | 17     | 5      | +       | 23    | 17      | 6       | +        | 1091.0703                  | 94.6                  | -1                         | I                      |
| 25   | 12     | 14     | +       | 26    | 12      | 15      | +        | 1091.0913                  | 73.0                  | 4                          | I                      |
| 25   | 12     | 14     | -       | 26    | 12      | 15      | -        | 1091.1022                  | 77.9                  | 0                          | I                      |
| 22   | 17     | 5      | -       | 23    | 17      | 6       | -        | 1091.1022                  | 77.9                  | 9                          | I                      |
| 27   | 6      | 22     | -       | 28    | 6       | 23      | -        | 1091.1335                  | 40.4                  | 1                          | I                      |
| 27   | 6      | 22     | +       | 28    | 6       | 23      | +        | 1091.1335                  | 40.4                  | -1                         | I                      |
| 29   | 2      | 28     | +       | 30    | 2       | 29      | +        | 1091.1632                  | 35.2                  | 1                          | I                      |
| 29   | 2      | 28     | -       | 30    | 2       | 29      | -        | 1091.1632                  | 35.2                  | -1                         | I                      |
| 30   | 0      | 30     | +       | 31    | 0       | 31      | +        | 1091.2055                  | 31.7                  | -1                         | I                      |
| 30   | 0      | 30     | -       | 31    | 0       | 31      | -        | 1091.2055                  | 31.7                  | 0                          | I                      |
| 21   | 18     | 4      | +       | 22    | 18      | 5       | +        | 1091.2444                  | 93.6                  | 7                          | I                      |

| $N'$ | $K'_a$ | $K'_c$ | $J'^a)$ | $N''$ | $K''_a$ | $K''_c$ | $J''^b)$ | $\nu$ , exp. <sup>c)</sup> | Transm. <sup>d)</sup> | $\delta_\nu$ <sup>e)</sup> | Spectrum <sup>f)</sup> |
|------|--------|--------|---------|-------|---------|---------|----------|----------------------------|-----------------------|----------------------------|------------------------|
|      |        | 1      |         |       |         | 2       |          | 3                          | 4                     | 5                          | 6                      |
| 27   | 5      | 23     | +       | 28    | 5       | 24      | +        | 1091.2536                  | 46.9                  | -5                         | I                      |
| 27   | 5      | 23     | -       | 28    | 5       | 24      | -        | 1091.2536                  | 46.9                  | 8                          | I                      |
| 26   | 9      | 17     | +       | 27    | 9       | 18      | +        | 1091.2765                  | 62.9                  | -2                         | I                      |
| 21   | 18     | 4      | -       | 22    | 18      | 5       | -        | 1091.2814                  | 68.9                  | 4                          | I                      |
| 26   | 9      | 17     | -       | 27    | 9       | 18      | -        | 1091.2814                  | 68.9                  | 1                          | I                      |
| 23   | 15     | 9      | +       | 24    | 15      | 10      | +        | 1091.3093                  | 89.6                  | 2                          | I                      |
| 23   | 15     | 9      | -       | 24    | 15      | 10      | -        | 1091.3314                  | 77.4                  | 2                          | I                      |
| 20   | 19     | 1      | +       | 21    | 19      | 2       | +        | 1091.3838                  | 76.8                  | 2                          | II                     |
| 25   | 11     | 15     | +       | 26    | 11      | 16      | +        | 1091.4167                  | 75.3                  | 1                          | I                      |
| 24   | 13     | 11     | +       | 25    | 13      | 12      | +        | 1091.4257                  | 66.3                  | 3                          | I                      |
| 25   | 11     | 15     | -       | 26    | 11      | 16      | -        | 1091.4257                  | 66.3                  | -1                         | I                      |
| 24   | 13     | 11     | -       | 25    | 13      | 12      | -        | 1091.4403                  | 82.5                  | 1                          | I                      |
| 27   | 4      | 24     | -       | 28    | 4       | 25      | -        | 1091.4488                  | 35.6                  | 4                          | I                      |
| 27   | 4      | 24     | +       | 28    | 4       | 25      | +        | 1091.4488                  | 35.6                  | -4                         | I                      |
| 26   | 8      | 18     | -       | 27    | 8       | 19      | -        | 1091.5047                  | 60.2                  | -31                        | I                      |
| 26   | 8      | 18     | +       | 27    | 8       | 19      | +        | 1091.5047                  | 60.2                  | -1                         | I                      |
| 22   | 16     | 6      | +       | 23    | 16      | 7       | +        | 1091.5455                  | 91.8                  | -1                         | I                      |
| 22   | 16     | 6      | -       | 23    | 16      | 7       | -        | 1091.5728                  | 92.3                  | 0                          | I                      |
| 26   | 7      | 19     | -       | 27    | 7       | 20      | -        | 1091.6960                  | 51.2                  | -7                         | I                      |
| 26   | 7      | 19     | +       | 27    | 7       | 20      | +        | 1091.6960                  | 51.2                  | 7                          | I                      |
| 26   | 3      | 23     | +       | 27    | 3       | 24      | +        | 1091.7114                  | 32.4                  | -1                         | I                      |
| 26   | 3      | 23     | -       | 27    | 3       | 24      | -        | 1091.7114                  | 32.4                  | 15                         | I                      |
| 26   | 4      | 22     | +       | 27    | 4       | 23      | +        | 1091.7185                  | 42.5                  | 1                          | I                      |
| 25   | 10     | 16     | -       | 26    | 10      | 17      | -        | 1091.7185                  | 42.5                  | -4                         | I                      |
| 23   | 14     | 10     | +       | 24    | 14      | 11      | +        | 1091.7255                  | 86.3                  | 0                          | I                      |
| 23   | 14     | 10     | -       | 24    | 14      | 11      | -        | 1091.7445                  | 86.3                  | 1                          | I                      |
| 21   | 17     | 5      | +       | 22    | 17      | 6       | +        | 1091.7486                  | 93.1                  | 2                          | I                      |
| 24   | 12     | 12     | +       | 25    | 12      | 13      | +        | 1091.7821                  | 76.0                  | 0                          | I                      |
| 21   | 17     | 5      | -       | 22    | 17      | 6       | -        | 1091.7821                  | 76.0                  | 4                          | I                      |
| 28   | 1      | 27     | -       | 29    | 1       | 28      | -        | 1091.7907                  | 35.5                  | -3                         | I                      |
| 28   | 1      | 27     | +       | 29    | 1       | 28      | +        | 1091.7907                  | 35.5                  | 2                          | I                      |
| 24   | 12     | 12     | -       | 25    | 12      | 13      | -        | 1091.7944                  | 75.5                  | -1                         | I                      |
| 35   | 2      | 34     | -       | 35    | 2       | 33      | -        | 1091.7944                  | 75.5                  | 0                          | I                      |
| 26   | 6      | 20     | -       | 27    | 6       | 21      | -        | 1091.8380                  | 38.8                  | 1                          | I                      |
| 26   | 6      | 20     | +       | 27    | 6       | 21      | +        | 1091.8380                  | 38.8                  | -1                         | I                      |
| 29   | 1      | 29     | +       | 30    | 1       | 30      | +        | 1091.8486                  | 29.6                  | -1                         | I                      |
| 29   | 1      | 29     | -       | 30    | 1       | 30      | -        | 1091.8486                  | 29.6                  | 0                          | I                      |
| 27   | 3      | 25     | -       | 28    | 3       | 26      | -        | 1091.8546                  | 32.7                  | 0                          | I                      |
| 27   | 3      | 25     | +       | 28    | 3       | 26      | +        | 1091.8546                  | 32.7                  | 0                          | I                      |
| 26   | 5      | 21     | -       | 27    | 5       | 22      | -        | 1091.8818                  | 53.0                  | 4                          | I                      |
| 26   | 5      | 21     | +       | 27    | 5       | 22      | +        | 1091.8834                  | 53.1                  | -3                         | I                      |
| 43   | 4      | 40     | +       | 43    | 4       | 39      | +        | 1091.8923                  | 97.2                  | 8                          | I                      |
| 20   | 18     | 2      | +       | 21    | 18      | 3       | +        | 1091.9179                  | 56.2                  | 0                          | II                     |
| 25   | 9      | 17     | +       | 26    | 9       | 18      | +        | 1091.9753                  | 68.0                  | 0                          | I                      |
| 25   | 9      | 17     | -       | 26    | 9       | 18      | -        | 1091.9804                  | 69.7                  | 1                          | I                      |
| 22   | 15     | 7      | +       | 23    | 15      | 8       | +        | 1091.9917                  | 89.0                  | 0                          | I                      |
| 22   | 15     | 7      | -       | 23    | 15      | 8       | -        | 1092.0155                  | 89.6                  | 1                          | I                      |
| 19   | 19     | 1      | +       | 20    | 19      | 2       | +        | 1092.0534                  | 82.4                  | -6                         | II                     |
| 19   | 19     | 1      | -       | 20    | 19      | 2       | -        | 1092.1027                  | 53.6                  | 2                          | II                     |
| 24   | 11     | 13     | +       | 25    | 11      | 14      | +        | 1092.1089                  | 74.4                  | 0                          | I                      |
| 23   | 13     | 11     | +       | 24    | 13      | 12      | +        | 1092.1125                  | 82.4                  | 0                          | I                      |
| 24   | 11     | 13     | -       | 25    | 11      | 14      | -        | 1092.1188                  | 76.2                  | 0                          | I                      |
| 23   | 13     | 11     | -       | 24    | 13      | 12      | -        | 1092.1286                  | 84.6                  | 0                          | I                      |
| 25   | 8      | 18     | +       | 26    | 8       | 19      | +        | 1092.2054                  | 65.5                  | 0                          | I                      |
| 25   | 8      | 18     | -       | 26    | 8       | 19      | -        | 1092.2089                  | 66.1                  | 1                          | I                      |
| 21   | 16     | 6      | +       | 22    | 16      | 7       | +        | 1092.2243                  | 91.9                  | 1                          | I                      |
| 21   | 16     | 6      | -       | 22    | 16      | 7       | -        | 1092.2535                  | 92.7                  | 0                          | I                      |
| 26   | 2      | 24     | -       | 27    | 2       | 25      | -        | 1092.2840                  | 43.2                  | -9                         | I                      |
| 26   | 2      | 24     | +       | 27    | 2       | 25      | +        | 1092.2840                  | 43.2                  | 5                          | I                      |
| 25   | 7      | 19     | -       | 26    | 7       | 20      | -        | 1092.3999                  | 54.4                  | -12                        | I                      |
| 25   | 7      | 19     | +       | 26    | 7       | 20      | +        | 1092.3999                  | 54.4                  | 5                          | I                      |
| 24   | 10     | 14     | +       | 25    | 10      | 15      | +        | 1092.4052                  | 70.7                  | 0                          | I                      |
| 22   | 14     | 8      | +       | 23    | 14      | 9       | +        | 1092.4086                  | 84.0                  | -1                         | I                      |
| 24   | 10     | 14     | -       | 25    | 10      | 15      | -        | 1092.4132                  | 68.4                  | 3                          | I                      |
| 20   | 17     | 3      | +       | 21    | 17      | 4       | +        | 1092.4238                  | 29.8                  | 5                          | II                     |
| 22   | 14     | 8      | -       | 23    | 14      | 9       | -        | 1092.4292                  | 87.2                  | 1                          | I                      |
| 27   | 2      | 26     | +       | 28    | 2       | 27      | +        | 1092.4534                  | 28.1                  | 2                          | I                      |
| 27   | 2      | 26     | -       | 28    | 2       | 27      | -        | 1092.4534                  | 28.1                  | 0                          | I                      |
| 20   | 17     | 3      | -       | 21    | 17      | 4       | -        | 1092.4592                  | 47.2                  | -1                         | II                     |
| 23   | 12     | 12     | +       | 24    | 12      | 13      | +        | 1092.4701                  | 79.7                  | 0                          | I                      |
| 23   | 12     | 12     | -       | 24    | 12      | 13      | -        | 1092.4834                  | 76.9                  | 1                          | I                      |
| 28   | 0      | 28     | +       | 29    | 0       | 29      | +        | 1092.4880                  | 27.8                  | -1                         | I                      |

| $N'$ | $K'_a$ | $K'_c$ | $J'^a)$ | $N''$ | $K''_a$ | $K''_c$ | $J''^b)$ | $\nu$ , exp. <sup>c)</sup> | Transm. <sup>d)</sup> | $\delta_\nu$ <sup>e)</sup> | Spectrum <sup>f)</sup> |
|------|--------|--------|---------|-------|---------|---------|----------|----------------------------|-----------------------|----------------------------|------------------------|
|      |        | 1      |         |       |         | 2       |          | 3                          | 4                     | 5                          | 6                      |
| 28   | 0      | 28     | —       | 29    | 0       | 29      | —        | 1092.4880                  | 27.8                  | 0                          | I                      |
| 25   | 6      | 20     | +       | 26    | 6       | 21      | +        | 1092.5529                  | 38.1                  | 1                          | I                      |
| 25   | 6      | 20     | —       | 26    | 6       | 21      | —        | 1092.5529                  | 38.1                  | -1                         | I                      |
| 19   | 18     | 2      | +       | 20    | 18      | 3       | +        | 1092.5892                  | 70.3                  | 2                          | II                     |
| 19   | 18     | 2      | —       | 20    | 18      | 3       | —        | 1092.6330                  | 64.5                  | 4                          | II                     |
| 21   | 15     | 7      | +       | 22    | 15      | 8       | +        | 1092.6714                  | 29.9                  | 5                          | I                      |
| 24   | 9      | 15     | +       | 25    | 9       | 16      | +        | 1092.6714                  | 29.9                  | 12                         | I                      |
| 25   | 5      | 21     | +       | 26    | 5       | 22      | +        | 1092.6714                  | 29.9                  | -7                         | I                      |
| 25   | 5      | 21     | —       | 26    | 5       | 22      | —        | 1092.6714                  | 29.9                  | 2                          | I                      |
| 24   | 9      | 15     | —       | 25    | 9       | 16      | —        | 1092.6760                  | 64.5                  | 1                          | I                      |
| 21   | 15     | 7      | —       | 22    | 15      | 8       | —        | 1092.6967                  | 90.0                  | 1                          | I                      |
| 23   | 11     | 13     | +       | 24    | 11      | 14      | +        | 1092.7974                  | 68.6                  | -4                         | I                      |
| 23   | 11     | 13     | —       | 24    | 11      | 14      | —        | 1092.8086                  | 76.4                  | 1                          | I                      |
| 22   | 13     | 9      | —       | 23    | 13      | 10      | —        | 1092.8138                  | 83.5                  | 0                          | I                      |
| 25   | 4      | 22     | —       | 26    | 4       | 23      | —        | 1092.8313                  | 33.1                  | 5                          | I                      |
| 25   | 4      | 22     | +       | 26    | 4       | 23      | +        | 1092.8313                  | 33.1                  | -5                         | I                      |
| 24   | 8      | 16     | +       | 25    | 8       | 17      | +        | 1092.9023                  | 64.5                  | 0                          | I                      |
| 24   | 8      | 16     | —       | 25    | 8       | 17      | —        | 1092.9062                  | 65.4                  | 1                          | I                      |
| 20   | 16     | 4      | —       | 21    | 16      | 5       | —        | 1092.9313                  | 31.1                  | -1                         | II                     |
| 26   | 1      | 25     | +       | 27    | 1       | 26      | +        | 1093.0635                  | 32.5                  | 3                          | I                      |
| 26   | 1      | 25     | —       | 27    | 1       | 26      | —        | 1093.0635                  | 32.5                  | -4                         | I                      |
| 21   | 14     | 8      | +       | 22    | 14      | 9       | +        | 1093.0886                  | 87.2                  | 0                          | II                     |
| 23   | 10     | 14     | +       | 24    | 10      | 15      | +        | 1093.0952                  | 68.6                  | 0                          | I                      |
| 19   | 17     | 3      | +       | 20    | 17      | 4       | +        | 1093.0952                  | 68.6                  | 3                          | I                      |
| 24   | 7      | 17     | +       | 25    | 7       | 18      | +        | 1093.0991                  | 56.0                  | 2                          | I                      |
| 24   | 7      | 17     | —       | 25    | 7       | 18      | —        | 1093.1009                  | 57.4                  | -1                         | I                      |
| 37   | 3      | 35     | —       | 37    | 3       | 34      | —        | 1093.1035                  | 68.9                  | 5                          | I                      |
| 23   | 10     | 14     | —       | 24    | 10      | 15      | —        | 1093.1035                  | 68.9                  | -1                         | I                      |
| 21   | 14     | 8      | —       | 22    | 14      | 9       | —        | 1093.1108                  | 86.8                  | 1                          | I                      |
| 24   | 3      | 21     | +       | 25    | 3       | 22      | +        | 1093.1218                  | 48.0                  | -25                        | I                      |
| 24   | 3      | 21     | —       | 25    | 3       | 22      | —        | 1093.1218                  | 48.0                  | 1                          | I                      |
| 27   | 1      | 27     | —       | 28    | 1       | 28      | —        | 1093.1258                  | 22.0                  | -2                         | I                      |
| 27   | 1      | 27     | +       | 28    | 1       | 28      | +        | 1093.1258                  | 22.0                  | -3                         | I                      |
| 19   | 17     | 3      | —       | 20    | 17      | 4       | —        | 1093.1339                  | 54.0                  | -1                         | II                     |
| 37   | 3      | 35     | +       | 37    | 3       | 34      | +        | 1093.1548                  | 78.4                  | 0                          | I                      |
| 22   | 12     | 10     | +       | 23    | 12      | 11      | +        | 1093.1548                  | 78.4                  | 0                          | I                      |
| 22   | 12     | 10     | —       | 23    | 12      | 11      | —        | 1093.1692                  | 80.1                  | 0                          | I                      |
| 25   | 3      | 23     | —       | 26    | 3       | 24      | —        | 1093.1765                  | 29.2                  | 1                          | I                      |
| 25   | 3      | 23     | +       | 26    | 3       | 24      | +        | 1093.1765                  | 29.2                  | -1                         | I                      |
| 59   | 7      | 53     | —       | 59    | 7       | 52      | —        | 1093.1967                  | 88.2                  | 2                          | II                     |
| 24   | 4      | 20     | —       | 25    | 4       | 21      | —        | 1093.2237                  | 52.4                  | 0                          | I                      |
| 24   | 4      | 20     | +       | 25    | 4       | 21      | +        | 1093.2278                  | 50.0                  | 0                          | I                      |
| 33   | 2      | 32     | —       | 33    | 2       | 31      | —        | 1093.2384                  | 90.9                  | -6                         | I                      |
| 24   | 6      | 18     | —       | 25    | 6       | 19      | —        | 1093.2531                  | 28.3                  | -3                         | I                      |
| 24   | 6      | 18     | +       | 25    | 6       | 19      | +        | 1093.2531                  | 28.3                  | 1                          | I                      |
| 59   | 7      | 53     | +       | 59    | 7       | 52      | +        | 1093.2648                  | 76.6                  | 9                          | II                     |
| 24   | 5      | 19     | +       | 25    | 5       | 20      | +        | 1093.3331                  | 41.8                  | -8                         | I                      |
| 24   | 5      | 19     | —       | 25    | 5       | 20      | —        | 1093.3331                  | 41.8                  | 7                          | I                      |
| 20   | 15     | 5      | +       | 21    | 15      | 6       | +        | 1093.3471                  | 91.1                  | 1                          | I                      |
| 23   | 9      | 15     | +       | 24    | 9       | 16      | +        | 1093.3616                  | 63.2                  | 1                          | I                      |
| 23   | 9      | 15     | —       | 24    | 9       | 16      | —        | 1093.3678                  | 69.1                  | 1                          | I                      |
| 20   | 15     | 5      | —       | 21    | 15      | 6       | —        | 1093.3754                  | 86.1                  | 6                          | I                      |
| 21   | 13     | 9      | +       | 22    | 13      | 10      | +        | 1093.4770                  | 84.0                  | 0                          | I                      |
| 22   | 11     | 11     | +       | 23    | 11      | 12      | +        | 1093.4833                  | 75.9                  | 0                          | I                      |
| 22   | 11     | 11     | —       | 23    | 11      | 12      | —        | 1093.4954                  | 67.7                  | 4                          | I                      |
| 21   | 13     | 9      | —       | 22    | 13      | 10      | —        | 1093.4954                  | 67.7                  | -4                         | I                      |
| 24   | 2      | 22     | —       | 25    | 2       | 23      | —        | 1093.5519                  | 32.6                  | -5                         | I                      |
| 24   | 2      | 22     | +       | 25    | 2       | 23      | +        | 1093.5519                  | 32.6                  | 4                          | I                      |
| 19   | 16     | 4      | +       | 20    | 16      | 5       | +        | 1093.5719                  | 39.8                  | 0                          | II                     |
| 23   | 8      | 16     | +       | 24    | 8       | 17      | +        | 1093.5955                  | 62.9                  | 0                          | I                      |
| 23   | 8      | 16     | —       | 24    | 8       | 17      | —        | 1093.5998                  | 64.6                  | 1                          | I                      |
| 19   | 16     | 4      | —       | 20    | 16      | 5       | —        | 1093.6064                  | 42.4                  | 0                          | II                     |
| 25   | 2      | 24     | —       | 26    | 2       | 25      | —        | 1093.7349                  | 27.7                  | -1                         | I                      |
| 25   | 2      | 24     | +       | 26    | 2       | 25      | +        | 1093.7349                  | 27.7                  | 1                          | I                      |
| 26   | 0      | 26     | —       | 27    | 0       | 27      | —        | 1093.7593                  | 25.4                  | 0                          | I                      |
| 26   | 0      | 26     | +       | 27    | 0       | 27      | +        | 1093.7593                  | 25.4                  | 0                          | I                      |
| 20   | 14     | 6      | +       | 21    | 14      | 7       | +        | 1093.7651                  | 85.8                  | -1                         | I                      |
| 22   | 10     | 12     | +       | 23    | 10      | 13      | +        | 1093.7820                  | 64.9                  | 3                          | I                      |
| 20   | 14     | 6      | —       | 21    | 14      | 7       | —        | 1093.7894                  | 65.2                  | 1                          | I                      |
| 23   | 7      | 17     | +       | 24    | 7       | 18      | +        | 1093.7949                  | 57.5                  | 1                          | I                      |
| 23   | 7      | 17     | —       | 24    | 7       | 18      | —        | 1093.7972                  | 59.2                  | 0                          | I                      |
| 18   | 17     | 1      | —       | 19    | 17      | 2       | —        | 1093.8059                  | 64.5                  | 0                          | II                     |

| $N'$ | $K'_a$ | $K'_c$ | $J'^a)$ | $N''$ | $K''_a$ | $K''_c$ | $J''^b)$ | $\nu$ , exp. <sup>c)</sup> | Transm. <sup>d)</sup> | $\delta_\nu$ <sup>e)</sup> | Spectrum <sup>f)</sup> |
|------|--------|--------|---------|-------|---------|---------|----------|----------------------------|-----------------------|----------------------------|------------------------|
|      |        | 1      |         |       |         | 2       |          | 3                          | 4                     | 5                          | 6                      |
| 21   | 12     | 10     | +       | 22    | 12      | 11      | +        | 1093.8362                  | 75.5                  | 1                          | I                      |
| 21   | 12     | 10     | -       | 22    | 12      | 11      | -        | 1093.8518                  | 81.1                  | 1                          | I                      |
| 41   | 4      | 38     | -       | 41    | 4       | 37      | -        | 1093.8903                  | 95.4                  | 6                          | I                      |
| 64   | 6      | 58     | +       | 65    | 6       | 59      | +        | 1093.9407                  | 97.5                  | 5                          | II                     |
| 23   | 6      | 18     | -       | 24    | 6       | 19      | -        | 1093.9559                  | 38.8                  | -4                         | I                      |
| 23   | 6      | 18     | +       | 24    | 6       | 19      | +        | 1093.9559                  | 38.8                  | 4                          | I                      |
| 19   | 15     | 5      | +       | 20    | 15      | 6       | +        | 1094.0197                  | 28.5                  | 0                          | II                     |
| 19   | 15     | 5      | -       | 20    | 15      | 6       | -        | 1094.0494                  | 64.2                  | -7                         | I                      |
| 22   | 9      | 13     | +       | 23    | 9       | 14      | +        | 1094.0494                  | 64.2                  | 1                          | I                      |
| 22   | 9      | 13     | -       | 23    | 9       | 14      | -        | 1094.0563                  | 69.5                  | 1                          | I                      |
| 23   | 5      | 19     | -       | 24    | 5       | 20      | -        | 1094.0779                  | 32.2                  | 3                          | I                      |
| 23   | 5      | 19     | +       | 24    | 5       | 20      | +        | 1094.0779                  | 32.2                  | -3                         | I                      |
| 20   | 13     | 7      | +       | 21    | 13      | 8       | +        | 1094.1542                  | 83.7                  | -1                         | II                     |
| 21   | 11     | 11     | +       | 22    | 11      | 12      | +        | 1094.1654                  | 75.7                  | 0                          | I                      |
| 20   | 13     | 7      | -       | 21    | 13      | 8       | -        | 1094.1749                  | 82.5                  | 2                          | I                      |
| 21   | 11     | 11     | -       | 22    | 11      | 12      | -        | 1094.1782                  | 76.3                  | 0                          | I                      |
| 23   | 4      | 20     | +       | 24    | 4       | 21      | +        | 1094.2120                  | 33.0                  | -5                         | I                      |
| 23   | 4      | 20     | -       | 24    | 4       | 21      | -        | 1094.2120                  | 33.0                  | 6                          | I                      |
| 18   | 16     | 2      | +       | 19    | 16      | 3       | +        | 1094.2408                  | 50.1                  | 0                          | II                     |
| 18   | 16     | 2      | -       | 19    | 16      | 3       | -        | 1094.2785                  | 49.7                  | 0                          | II                     |
| 22   | 8      | 14     | +       | 23    | 8       | 15      | +        | 1094.2851                  | 60.1                  | 1                          | I                      |
| 22   | 8      | 14     | -       | 23    | 8       | 15      | -        | 1094.2898                  | 63.6                  | 1                          | I                      |
| 24   | 1      | 23     | -       | 25    | 1       | 24      | -        | 1094.3214                  | 32.3                  | -4                         | I                      |
| 24   | 1      | 23     | +       | 25    | 1       | 24      | +        | 1094.3214                  | 32.3                  | 4                          | I                      |
| 25   | 1      | 25     | -       | 26    | 1       | 26      | -        | 1094.3924                  | 24.1                  | 0                          | I                      |
| 25   | 1      | 25     | +       | 26    | 1       | 26      | +        | 1094.3924                  | 24.1                  | 0                          | I                      |
| 17   | 17     | 1      | +       | 18    | 17      | 2       | +        | 1094.4286                  | 81.6                  | 1                          | I                      |
| 19   | 14     | 6      | +       | 20    | 14      | 7       | +        | 1094.4386                  | 89.0                  | 0                          | I                      |
| 19   | 14     | 6      | -       | 20    | 14      | 7       | -        | 1094.4649                  | 62.1                  | 1                          | I                      |
| 21   | 10     | 12     | +       | 22    | 10      | 13      | +        | 1094.4649                  | 62.1                  | 1                          | I                      |
| 21   | 10     | 12     | -       | 22    | 10      | 13      | -        | 1094.4750                  | 71.5                  | 1                          | I                      |
| 17   | 17     | 1      | -       | 18    | 17      | 2       | -        | 1094.4750                  | 71.5                  | 0                          | I                      |
| 22   | 7      | 15     | +       | 23    | 7       | 16      | +        | 1094.4866                  | 57.8                  | 1                          | I                      |
| 22   | 7      | 15     | -       | 23    | 7       | 16      | -        | 1094.4894                  | 58.3                  | 1                          | I                      |
| 23   | 3      | 21     | -       | 24    | 3       | 22      | -        | 1094.4984                  | 24.5                  | 2                          | I                      |
| 23   | 3      | 21     | +       | 24    | 3       | 22      | +        | 1094.4984                  | 24.5                  | -2                         | I                      |
| 20   | 12     | 8      | +       | 21    | 12      | 9       | +        | 1094.5140                  | 80.4                  | 0                          | I                      |
| 20   | 12     | 8      | -       | 21    | 12      | 9       | -        | 1094.5309                  | 78.1                  | -2                         | I                      |
| 22   | 3      | 19     | -       | 23    | 3       | 20      | -        | 1094.5539                  | 49.0                  | 0                          | I                      |
| 22   | 3      | 19     | +       | 23    | 3       | 20      | +        | 1094.5573                  | 46.3                  | 0                          | I                      |
| 22   | 6      | 16     | -       | 23    | 6       | 17      | -        | 1094.6500                  | 38.1                  | -5                         | I                      |
| 22   | 6      | 16     | +       | 23    | 6       | 17      | +        | 1094.6500                  | 38.1                  | 6                          | I                      |
| 18   | 15     | 3      | +       | 19    | 15      | 4       | +        | 1094.6893                  | 33.1                  | 0                          | II                     |
| 22   | 4      | 18     | -       | 23    | 4       | 19      | -        | 1094.7096                  | 49.1                  | 1                          | I                      |
| 22   | 4      | 18     | +       | 23    | 4       | 19      | +        | 1094.7131                  | 40.3                  | 1                          | I                      |
| 18   | 15     | 3      | -       | 19    | 15      | 4       | -        | 1094.7223                  | 31.8                  | -1                         | II                     |
| 21   | 9      | 13     | +       | 22    | 9       | 14      | +        | 1094.7335                  | 68.1                  | 0                          | I                      |
| 21   | 9      | 13     | -       | 22    | 9       | 14      | -        | 1094.7412                  | 69.4                  | 1                          | I                      |
| 22   | 5      | 17     | +       | 23    | 5       | 18      | +        | 1094.7545                  | 32.7                  | -4                         | I                      |
| 22   | 5      | 17     | -       | 23    | 5       | 18      | -        | 1094.7545                  | 32.7                  | 4                          | I                      |
| 19   | 13     | 7      | +       | 20    | 13      | 8       | +        | 1094.8283                  | 83.9                  | 1                          | I                      |
| 22   | 2      | 20     | +       | 23    | 2       | 21      | +        | 1094.8354                  | 25.3                  | 0                          | I                      |
| 22   | 2      | 20     | -       | 23    | 2       | 21      | -        | 1094.8354                  | 25.3                  | -1                         | I                      |
| 20   | 11     | 9      | +       | 21    | 11      | 10      | +        | 1094.8441                  | 75.3                  | 0                          | I                      |
| 19   | 13     | 7      | -       | 20    | 13      | 8       | -        | 1094.8506                  | 84.7                  | -1                         | I                      |
| 20   | 11     | 9      | -       | 21    | 11      | 10      | -        | 1094.8580                  | 75.7                  | -1                         | I                      |
| 32   | 31     | 1      | +       | 32    | 31      | 2       | +        | 1094.8902                  | 95.7                  | 2                          | II                     |
| 17   | 16     | 2      | +       | 18    | 16      | 3       | +        | 1094.9064                  | 96.2                  | -1                         | I                      |
| 17   | 16     | 2      | -       | 18    | 16      | 3       | -        | 1094.9479                  | 81.4                  | 1                          | I                      |
| 21   | 8      | 14     | +       | 22    | 8       | 15      | +        | 1094.9707                  | 63.4                  | 0                          | I                      |
| 21   | 8      | 14     | -       | 22    | 8       | 15      | -        | 1094.9761                  | 62.7                  | 0                          | I                      |
| 23   | 2      | 22     | +       | 24    | 2       | 23      | +        | 1095.0092                  | 25.0                  | 1                          | I                      |
| 23   | 2      | 22     | -       | 24    | 2       | 23      | -        | 1095.0092                  | 25.0                  | -1                         | I                      |
| 24   | 0      | 24     | -       | 25    | 0       | 25      | -        | 1095.0192                  | 23.3                  | 0                          | I                      |
| 24   | 0      | 24     | +       | 25    | 0       | 25      | +        | 1095.0192                  | 23.3                  | 0                          | I                      |
| 18   | 14     | 4      | +       | 19    | 14      | 5       | +        | 1095.1086                  | 89.8                  | 0                          | I                      |
| 18   | 14     | 4      | -       | 19    | 14      | 5       | -        | 1095.1373                  | 89.7                  | 0                          | I                      |
| 20   | 10     | 10     | +       | 21    | 10      | 11      | +        | 1095.1445                  | 69.2                  | 1                          | I                      |
| 20   | 10     | 10     | -       | 21    | 10      | 11      | -        | 1095.1555                  | 73.1                  | 1                          | I                      |
| 21   | 7      | 15     | +       | 22    | 7       | 16      | +        | 1095.1746                  | 58.4                  | 0                          | I                      |
| 21   | 7      | 15     | -       | 22    | 7       | 16      | -        | 1095.1779                  | 59.3                  | 1                          | I                      |
| 19   | 12     | 8      | +       | 20    | 12      | 9       | +        | 1095.1887                  | 78.5                  | 2                          | I                      |

| $N'$ | $K'_a$ | $K'_c$ | $J'^a)$ | $N''$ | $K''_a$ | $K''_c$ | $J''^b)$ | $\nu$ , exp. <sup>c)</sup> | Transm. <sup>d)</sup> | $\delta_\nu$ <sup>e)</sup> | Spectrum <sup>f)</sup> |
|------|--------|--------|---------|-------|---------|---------|----------|----------------------------|-----------------------|----------------------------|------------------------|
|      |        | 1      |         |       |         | 2       |          | 3                          | 4                     | 5                          | 6                      |
| 19   | 12     | 8      | —       | 20    | 12      | 9       | —        | 1095.2074                  | 79.7                  | 1                          | I                      |
| 27   | 1      | 27     | +       | 27    | 1       | 26      | +        | 1095.3213                  | 98.2                  | 3                          | I                      |
| 21   | 6      | 16     | —       | 22    | 6       | 17      | —        | 1095.3422                  | 41.2                  | -10                        | I                      |
| 21   | 6      | 16     | +       | 22    | 6       | 17      | +        | 1095.3422                  | 41.2                  | 4                          | I                      |
| 17   | 15     | 3      | +       | 18    | 15      | 4       | +        | 1095.3560                  | 90.3                  | 5                          | I                      |
| 17   | 15     | 3      | —       | 18    | 15      | 4       | —        | 1095.3918                  | 94.2                  | -1                         | I                      |
| 20   | 9      | 11     | +       | 21    | 9       | 12      | +        | 1095.4142                  | 67.6                  | 0                          | I                      |
| 20   | 9      | 11     | —       | 21    | 9       | 12      | —        | 1095.4228                  | 69.1                  | 1                          | I                      |
| 21   | 5      | 17     | —       | 22    | 5       | 18      | —        | 1095.4701                  | 30.5                  | 1                          | I                      |
| 21   | 5      | 17     | +       | 22    | 5       | 18      | +        | 1095.4701                  | 30.5                  | -1                         | I                      |
| 18   | 13     | 5      | +       | 19    | 13      | 6       | +        | 1095.4989                  | 85.8                  | 1                          | I                      |
| 19   | 11     | 9      | +       | 20    | 11      | 10      | +        | 1095.5194                  | 75.3                  | -1                         | I                      |
| 18   | 13     | 5      | —       | 19    | 13      | 6       | —        | 1095.5234                  | 85.9                  | 0                          | I                      |
| 19   | 11     | 9      | —       | 20    | 11      | 10      | —        | 1095.5349                  | 77.7                  | 0                          | I                      |
| 22   | 1      | 21     | —       | 23    | 1       | 22      | —        | 1095.5635                  | 30.4                  | -5                         | I                      |
| 22   | 1      | 21     | +       | 23    | 1       | 22      | +        | 1095.5635                  | 30.4                  | 5                          | I                      |
| 21   | 4      | 18     | —       | 22    | 4       | 19      | —        | 1095.5883                  | 31.1                  | 5                          | I                      |
| 21   | 4      | 18     | +       | 22    | 4       | 19      | +        | 1095.5883                  | 31.1                  | -4                         | I                      |
| 16   | 16     | 0      | —       | 17    | 16      | 1       | —        | 1095.6145                  | 84.8                  | 1                          | I                      |
| 23   | 1      | 23     | —       | 24    | 1       | 24      | —        | 1095.6479                  | 19.8                  | 0                          | I                      |
| 23   | 1      | 23     | +       | 24    | 1       | 24      | +        | 1095.6479                  | 19.8                  | 0                          | I                      |
| 20   | 8      | 12     | +       | 21    | 8       | 13      | +        | 1095.6528                  | 60.1                  | 0                          | I                      |
| 20   | 8      | 12     | —       | 21    | 8       | 13      | —        | 1095.6587                  | 54.4                  | -1                         | I                      |
| 45   | 5      | 41     | —       | 45    | 5       | 40      | —        | 1095.6587                  | 54.4                  | 5                          | I                      |
| 33   | 30     | 4      | —       | 33    | 30      | 3       | —        | 1095.6931                  | 85.3                  | 13                         | II                     |
| 17   | 14     | 4      | +       | 18    | 14      | 5       | +        | 1095.7754                  | 91.2                  | 0                          | I                      |
| 19   | 10     | 10     | +       | 20    | 10      | 11      | +        | 1095.8208                  | 20.8                  | 3                          | I                      |
| 21   | 3      | 19     | +       | 22    | 3       | 20      | +        | 1095.8208                  | 20.8                  | -4                         | I                      |
| 21   | 3      | 19     | —       | 22    | 3       | 20      | —        | 1095.8208                  | 20.8                  | 3                          | I                      |
| 19   | 10     | 10     | —       | 20    | 10      | 11      | —        | 1095.8328                  | 73.7                  | 1                          | I                      |
| 20   | 7      | 13     | +       | 21    | 7       | 14      | +        | 1095.8587                  | 50.9                  | 1                          | I                      |
| 20   | 7      | 13     | —       | 21    | 7       | 14      | —        | 1095.8626                  | 56.8                  | 2                          | I                      |
| 18   | 12     | 6      | —       | 19    | 12      | 7       | —        | 1095.8805                  | 82.8                  | 1                          | I                      |
| 20   | 3      | 17     | —       | 21    | 3       | 18      | —        | 1095.9996                  | 45.8                  | -1                         | I                      |
| 20   | 3      | 17     | +       | 21    | 3       | 18      | +        | 1096.0037                  | 45.3                  | 0                          | I                      |
| 16   | 15     | 1      | +       | 17    | 15      | 2       | +        | 1096.0184                  | 89.1                  | 1                          | II                     |
| 20   | 6      | 14     | +       | 21    | 6       | 15      | +        | 1096.0289                  | 41.3                  | 6                          | I                      |
| 20   | 6      | 14     | —       | 21    | 6       | 15      | —        | 1096.0289                  | 41.3                  | -12                        | I                      |
| 26   | 2      | 24     | —       | 26    | 4       | 23      | —        | 1096.0525                  | 86.0                  | 3                          | I                      |
| 3    | 1      | 3      | +       | 4     | 3       | 2       | +        | 1096.0525                  | 86.0                  | 1                          | I                      |
| 39   | 4      | 36     | +       | 39    | 4       | 35      | +        | 1096.0652                  | 98.5                  | -6                         | I                      |
| 19   | 9      | 11     | +       | 20    | 9       | 12      | +        | 1096.0914                  | 67.5                  | 0                          | I                      |
| 19   | 9      | 11     | —       | 20    | 9       | 12      | —        | 1096.1009                  | 69.6                  | 1                          | I                      |
| 20   | 2      | 18     | —       | 21    | 2       | 19      | —        | 1096.1424                  | 28.0                  | 5                          | I                      |
| 20   | 2      | 18     | +       | 21    | 2       | 19      | +        | 1096.1424                  | 28.0                  | -5                         | I                      |
| 20   | 5      | 15     | —       | 21    | 5       | 16      | —        | 1096.1508                  | 29.3                  | 1                          | I                      |
| 20   | 5      | 15     | +       | 21    | 5       | 16      | +        | 1096.1508                  | 29.3                  | 0                          | I                      |
| 20   | 4      | 16     | —       | 21    | 4       | 17      | —        | 1096.1621                  | 43.6                  | 1                          | I                      |
| 20   | 4      | 16     | +       | 21    | 4       | 17      | +        | 1096.1648                  | 42.2                  | 1                          | I                      |
| 18   | 11     | 7      | +       | 19    | 11      | 8       | +        | 1096.1915                  | 74.9                  | 1                          | I                      |
| 18   | 11     | 7      | —       | 19    | 11      | 8       | —        | 1096.2084                  | 77.7                  | 1                          | I                      |
| 22   | 0      | 22     | +       | 23    | 0       | 23      | +        | 1096.2673                  | 19.1                  | -1                         | I                      |
| 22   | 0      | 22     | —       | 23    | 0       | 23      | —        | 1096.2673                  | 19.1                  | -2                         | I                      |
| 21   | 2      | 20     | —       | 22    | 2       | 21      | —        | 1096.2777                  | 22.6                  | 0                          | I                      |
| 21   | 2      | 20     | +       | 22    | 2       | 21      | +        | 1096.2777                  | 22.6                  | 0                          | I                      |
| 35   | 29     | 7      | +       | 35    | 29      | 6       | +        | 1096.3239                  | 88.4                  | 0                          | II                     |
| 19   | 8      | 12     | +       | 20    | 8       | 13      | +        | 1096.3313                  | 62.4                  | 1                          | I                      |
| 19   | 8      | 12     | —       | 20    | 8       | 13      | —        | 1096.3381                  | 58.0                  | 0                          | I                      |
| 16   | 14     | 2      | +       | 17    | 14      | 3       | +        | 1096.4389                  | 92.7                  | 2                          | I                      |
| 16   | 14     | 2      | —       | 17    | 14      | 3       | —        | 1096.4737                  | 91.1                  | 0                          | I                      |
| 18   | 10     | 8      | +       | 19    | 10      | 9       | +        | 1096.4932                  | 70.8                  | 0                          | I                      |
| 18   | 10     | 8      | —       | 19    | 10      | 9       | —        | 1096.5069                  | 71.9                  | 2                          | I                      |
| 33   | 29     | 5      | —       | 33    | 29      | 4       | —        | 1096.5184                  | 42.3                  | -6                         | II                     |
| 17   | 12     | 6      | +       | 18    | 12      | 7       | +        | 1096.5277                  | 83.0                  | 0                          | I                      |
| 19   | 7      | 13     | +       | 20    | 7       | 14      | +        | 1096.5389                  | 54.3                  | 0                          | I                      |
| 19   | 7      | 13     | —       | 20    | 7       | 14      | —        | 1096.5435                  | 57.6                  | 2                          | I                      |
| 17   | 12     | 6      | —       | 18    | 12      | 7       | —        | 1096.5508                  | 76.5                  | 4                          | I                      |
| 32   | 29     | 3      | +       | 32    | 29      | 4       | +        | 1096.5819                  | 93.0                  | 1                          | II                     |
| 19   | 6      | 14     | +       | 20    | 6       | 15      | +        | 1096.7117                  | 47.3                  | -1                         | I                      |
| 19   | 6      | 14     | —       | 20    | 6       | 15      | —        | 1096.7140                  | 53.5                  | -1                         | I                      |
| 15   | 15     | 1      | —       | 16    | 15      | 2       | —        | 1096.7224                  | 96.4                  | 1                          | I                      |
| 18   | 9      | 9      | +       | 19    | 9       | 10      | +        | 1096.7651                  | 63.6                  | 1                          | I                      |



| $N'$ | $K'_a$ | $K'_c$ | $J'^a)$ | $N''$ | $K''_a$ | $K''_c$ | $J''^b)$ | $\nu$ , exp. <sup>c)</sup> | Transm. <sup>d)</sup> | $\delta_\nu$ <sup>e)</sup> | Spectrum <sup>f)</sup> |
|------|--------|--------|---------|-------|---------|---------|----------|----------------------------|-----------------------|----------------------------|------------------------|
|      |        | 1      |         |       |         | 2       |          | 3                          | 4                     | 5                          | 6                      |
| 18   | 9      | 9      | —       | 19    | 9       | 10      | —        | 1096.7755                  | 69.5                  | 1                          | I                      |
| 20   | 1      | 19     | +       | 21    | 1       | 20      | +        | 1096.7914                  | 28.1                  | 5                          | I                      |
| 20   | 1      | 19     | —       | 21    | 1       | 20      | —        | 1096.7914                  | 28.1                  | -5                         | I                      |
| 29   | 29     | 1      | +       | 29    | 29      | 0       | +        | 1096.8159                  | 86.3                  | -4                         | II                     |
| 16   | 13     | 3      | +       | 17    | 13      | 4       | +        | 1096.8300                  | 83.1                  | -1                         | I                      |
| 19   | 5      | 15     | —       | 20    | 5       | 16      | —        | 1096.8469                  | 29.3                  | -1                         | I                      |
| 19   | 5      | 15     | +       | 20    | 5       | 16      | +        | 1096.8469                  | 29.3                  | 3                          | I                      |
| 16   | 13     | 3      | —       | 17    | 13      | 4       | —        | 1096.8599                  | 70.5                  | -1                         | I                      |
| 17   | 11     | 7      | +       | 18    | 11      | 8       | +        | 1096.8599                  | 70.5                  | 1                          | I                      |
| 17   | 11     | 7      | —       | 18    | 11      | 8       | —        | 1096.8787                  | 78.6                  | 1                          | I                      |
| 21   | 1      | 21     | +       | 22    | 1       | 22      | +        | 1096.8928                  | 20.2                  | -1                         | I                      |
| 21   | 1      | 21     | —       | 22    | 1       | 22      | —        | 1096.8928                  | 20.2                  | -1                         | I                      |
| 19   | 4      | 16     | —       | 20    | 4       | 17      | —        | 1096.9575                  | 29.4                  | 5                          | I                      |
| 19   | 4      | 16     | +       | 20    | 4       | 17      | +        | 1096.9575                  | 29.4                  | -2                         | I                      |
| 18   | 8      | 10     | +       | 19    | 8       | 11      | +        | 1097.0061                  | 64.2                  | 0                          | I                      |
| 18   | 8      | 10     | —       | 19    | 8       | 11      | —        | 1097.0138                  | 63.2                  | 1                          | I                      |
| 15   | 14     | 2      | +       | 16    | 14      | 3       | +        | 1097.0988                  | 94.0                  | 1                          | I                      |
| 15   | 14     | 2      | —       | 16    | 14      | 3       | —        | 1097.1377                  | 91.6                  | 2                          | I                      |
| 19   | 3      | 17     | —       | 20    | 3       | 18      | —        | 1097.1439                  | 24.2                  | 5                          | I                      |
| 19   | 3      | 17     | +       | 20    | 3       | 18      | +        | 1097.1439                  | 24.2                  | -3                         | I                      |
| 17   | 10     | 8      | +       | 18    | 10      | 9       | +        | 1097.1624                  | 72.4                  | 1                          | I                      |
| 17   | 10     | 8      | —       | 18    | 10      | 9       | —        | 1097.1776                  | 75.5                  | 1                          | I                      |
| 16   | 12     | 4      | +       | 17    | 12      | 5       | +        | 1097.1925                  | 76.5                  | 4                          | I                      |
| 18   | 7      | 11     | +       | 19    | 7       | 12      | +        | 1097.2154                  | 57.6                  | 1                          | I                      |
| 18   | 7      | 11     | —       | 19    | 7       | 12      | —        | 1097.2205                  | 60.1                  | 1                          | I                      |
| 18   | 6      | 12     | +       | 19    | 6       | 13      | +        | 1097.3906                  | 53.8                  | 1                          | I                      |
| 18   | 6      | 12     | —       | 19    | 6       | 13      | —        | 1097.3933                  | 55.1                  | 0                          | I                      |
| 17   | 9      | 9      | +       | 18    | 9       | 10      | +        | 1097.4353                  | 62.1                  | 2                          | I                      |
| 17   | 9      | 9      | —       | 18    | 9       | 10      | —        | 1097.4488                  | 46.0                  | 21                         | I                      |
| 18   | 3      | 15     | —       | 19    | 3       | 16      | —        | 1097.4488                  | 46.0                  | -1                         | I                      |
| 18   | 3      | 15     | +       | 19    | 3       | 16      | +        | 1097.4532                  | 44.6                  | 0                          | I                      |
| 18   | 2      | 16     | —       | 19    | 2       | 17      | —        | 1097.4730                  | 38.9                  | 3                          | I                      |
| 18   | 2      | 16     | +       | 19    | 2       | 17      | +        | 1097.4745                  | 38.9                  | -2                         | I                      |
| 15   | 13     | 3      | +       | 16    | 13      | 4       | +        | 1097.4907                  | 74.4                  | 1                          | I                      |
| 20   | 0      | 20     | +       | 21    | 0       | 21      | +        | 1097.5036                  | 19.9                  | 1                          | I                      |
| 20   | 0      | 20     | —       | 21    | 0       | 21      | —        | 1097.5036                  | 19.9                  | -1                         | I                      |
| 18   | 5      | 13     | —       | 19    | 5       | 14      | —        | 1097.5251                  | 26.4                  | -4                         | I                      |
| 16   | 11     | 5      | +       | 17    | 11      | 6       | +        | 1097.5251                  | 26.4                  | 2                          | I                      |
| 18   | 5      | 13     | +       | 19    | 5       | 14      | +        | 1097.5251                  | 26.4                  | 3                          | I                      |
| 19   | 2      | 18     | +       | 20    | 2       | 19      | +        | 1097.5422                  | 21.0                  | 0                          | I                      |
| 19   | 2      | 18     | —       | 20    | 2       | 19      | —        | 1097.5422                  | 21.0                  | 1                          | I                      |
| 16   | 11     | 5      | —       | 17    | 11      | 6       | —        | 1097.5456                  | 69.4                  | -2                         | I                      |
| 18   | 4      | 14     | —       | 19    | 4       | 15      | —        | 1097.5800                  | 36.1                  | 11                         | I                      |
| 18   | 4      | 14     | +       | 19    | 4       | 15      | +        | 1097.5800                  | 36.1                  | -6                         | I                      |
| 29   | 28     | 2      | +       | 29    | 28      | 1       | +        | 1097.6232                  | 77.6                  | -5                         | II                     |
| 29   | 28     | 2      | —       | 29    | 28      | 1       | —        | 1097.6455                  | 54.4                  | 2                          | II                     |
| 17   | 8      | 10     | +       | 18    | 8       | 11      | +        | 1097.6772                  | 64.3                  | 0                          | I                      |
| 17   | 8      | 10     | —       | 18    | 8       | 11      | —        | 1097.6858                  | 54.1                  | 0                          | I                      |
| 37   | 27     | 11     | —       | 37    | 27      | 10      | —        | 1097.7061                  | 89.1                  | 2                          | II                     |
| 28   | 28     | 0      | —       | 28    | 28      | 1       | —        | 1097.7208                  | 76.0                  | -1                         | II                     |
| 14   | 14     | 0      | +       | 15    | 14      | 1       | +        | 1097.7553                  | 96.6                  | 1                          | I                      |
| 43   | 26     | 18     | —       | 43    | 26      | 17      | —        | 1097.7729                  | 96.2                  | 0                          | II                     |
| 14   | 14     | 0      | —       | 15    | 14      | 1       | —        | 1097.7976                  | 94.1                  | -10                        | I                      |
| 16   | 10     | 6      | +       | 17    | 10      | 7       | +        | 1097.8281                  | 75.3                  | 0                          | I                      |
| 16   | 10     | 6      | —       | 17    | 10      | 7       | —        | 1097.8451                  | 75.8                  | 1                          | I                      |
| 15   | 12     | 4      | +       | 16    | 12      | 5       | +        | 1097.8534                  | 78.0                  | 3                          | I                      |
| 15   | 12     | 4      | —       | 16    | 12      | 5       | —        | 1097.8818                  | 82.5                  | 4                          | I                      |
| 17   | 7      | 11     | +       | 18    | 7       | 12      | +        | 1097.8880                  | 59.8                  | 0                          | I                      |
| 17   | 7      | 11     | —       | 18    | 7       | 12      | —        | 1097.8940                  | 61.6                  | 1                          | I                      |
| 68   | 5      | 63     | —       | 68    | 7       | 62      | —        | 1097.9140                  | 31.1                  | 2                          | II                     |
| 23   | 1      | 23     | —       | 23    | 1       | 22      | —        | 1097.9685                  | 94.9                  | -2                         | I                      |
| 18   | 1      | 17     | +       | 19    | 1       | 18      | +        | 1098.0108                  | 26.7                  | 4                          | I                      |
| 18   | 1      | 17     | —       | 19    | 1       | 18      | —        | 1098.0108                  | 26.7                  | -4                         | I                      |
| 17   | 6      | 12     | +       | 18    | 6       | 13      | +        | 1098.0656                  | 54.7                  | 1                          | I                      |
| 17   | 6      | 12     | —       | 18    | 6       | 13      | —        | 1098.0690                  | 56.0                  | 1                          | I                      |
| 16   | 9      | 7      | +       | 17    | 9       | 8       | +        | 1098.1016                  | 69.1                  | 1                          | I                      |
| 16   | 9      | 7      | —       | 17    | 9       | 8       | —        | 1098.1149                  | 71.7                  | 1                          | I                      |
| 19   | 1      | 19     | —       | 20    | 1       | 20      | —        | 1098.1275                  | 21.1                  | 0                          | I                      |
| 19   | 1      | 19     | +       | 20    | 1       | 20      | +        | 1098.1275                  | 21.1                  | 0                          | I                      |
| 14   | 13     | 1      | +       | 15    | 13      | 2       | +        | 1098.1476                  | 92.9                  | 0                          | I                      |
| 32   | 27     | 5      | +       | 32    | 27      | 6       | +        | 1098.1548                  | 88.8                  | 2                          | II                     |
| 32   | 27     | 5      | —       | 32    | 27      | 6       | —        | 1098.1739                  | 76.3                  | 3                          | II                     |

| $N'$ | $K'_a$ | $K'_c$ | $J'^a)$ | $N''$ | $K''_a$ | $K''_c$ | $J''^b)$ | $\nu$ , exp. <sup>c)</sup> | Transm. <sup>d)</sup> | $\delta_\nu$ <sup>e)</sup> | Spectrum <sup>f)</sup> |
|------|--------|--------|---------|-------|---------|---------|----------|----------------------------|-----------------------|----------------------------|------------------------|
|      |        | 1      |         |       |         | 2       |          | 3                          | 4                     | 5                          | 6                      |
| 15   | 11     | 5      | +       | 16    | 11      | 6       | +        | 1098.1864                  | 68.4                  | -1                         | I                      |
| 17   | 5      | 13     | +       | 18    | 5       | 14      | +        | 1098.2074                  | 37.4                  | 6                          | I                      |
| 17   | 5      | 13     | -       | 18    | 5       | 14      | -        | 1098.2074                  | 37.4                  | -6                         | I                      |
| 39   | 26     | 14     | -       | 39    | 26      | 13      | -        | 1098.2283                  | 87.0                  | 8                          | II                     |
| 31   | 27     | 5      | +       | 31    | 27      | 4       | +        | 1098.2401                  | 55.9                  | 5                          | II                     |
| 31   | 27     | 5      | -       | 31    | 27      | 4       | -        | 1098.2596                  | 88.9                  | 5                          | II                     |
| 17   | 4      | 14     | +       | 18    | 4       | 15      | +        | 1098.3166                  | 27.9                  | -2                         | I                      |
| 17   | 4      | 14     | -       | 18    | 4       | 15      | -        | 1098.3166                  | 27.9                  | 3                          | I                      |
| 16   | 8      | 8      | +       | 17    | 8       | 9       | +        | 1098.3448                  | 65.2                  | 0                          | I                      |
| 16   | 8      | 8      | -       | 17    | 8       | 9       | -        | 1098.3547                  | 67.2                  | 1                          | I                      |
| 29   | 27     | 3      | +       | 29    | 27      | 2       | +        | 1098.4011                  | 67.4                  | -2                         | II                     |
| 37   | 26     | 12     | +       | 37    | 26      | 11      | +        | 1098.4218                  | 75.6                  | 0                          | II                     |
| 29   | 27     | 3      | -       | 29    | 27      | 2       | -        | 1098.4218                  | 75.6                  | -1                         | II                     |
| 43   | 25     | 19     | +       | 43    | 25      | 18      | +        | 1098.4507                  | 88.2                  | 1                          | II                     |
| 17   | 3      | 15     | +       | 18    | 3       | 16      | +        | 1098.4663                  | 27.6                  | -4                         | I                      |
| 17   | 3      | 15     | -       | 18    | 3       | 16      | -        | 1098.4663                  | 27.6                  | 5                          | I                      |
| 28   | 27     | 1      | +       | 28    | 27      | 2       | +        | 1098.4780                  | 82.5                  | -1                         | II                     |
| 15   | 10     | 6      | +       | 16    | 10      | 7       | +        | 1098.4904                  | 76.9                  | 0                          | I                      |
| 15   | 10     | 6      | -       | 16    | 10      | 7       | -        | 1098.5097                  | 72.8                  | 3                          | I                      |
| 14   | 12     | 2      | +       | 15    | 12      | 3       | +        | 1098.5097                  | 72.8                  | -10                        | I                      |
| 14   | 12     | 2      | -       | 15    | 12      | 3       | -        | 1098.5425                  | 89.3                  | 0                          | I                      |
| 27   | 27     | 1      | +       | 27    | 27      | 0       | +        | 1098.5519                  | 75.0                  | -3                         | II                     |
| 16   | 7      | 9      | +       | 17    | 7       | 10      | +        | 1098.5569                  | 61.0                  | 0                          | I                      |
| 16   | 7      | 9      | -       | 17    | 7       | 10      | -        | 1098.5638                  | 62.5                  | 1                          | I                      |
| 27   | 27     | 1      | -       | 27    | 27      | 0       | -        | 1098.5741                  | 73.7                  | 2                          | II                     |
| 35   | 26     | 10     | +       | 35    | 26      | 9       | +        | 1098.6201                  | 88.2                  | -4                         | II                     |
| 35   | 26     | 10     | -       | 35    | 26      | 9       | -        | 1098.6378                  | 88.2                  | 5                          | II                     |
| 41   | 25     | 17     | +       | 41    | 25      | 16      | +        | 1098.6876                  | 89.9                  | 1                          | II                     |
| 18   | 0      | 18     | +       | 19    | 0       | 19      | +        | 1098.7272                  | 20.6                  | 1                          | I                      |
| 18   | 0      | 18     | -       | 19    | 0       | 19      | -        | 1098.7272                  | 20.6                  | -1                         | I                      |
| 16   | 6      | 10     | +       | 17    | 6       | 11      | +        | 1098.7364                  | 53.7                  | 0                          | I                      |
| 16   | 6      | 10     | -       | 17    | 6       | 11      | -        | 1098.7406                  | 57.3                  | 1                          | I                      |
| 15   | 9      | 7      | +       | 16    | 9       | 8       | +        | 1098.7646                  | 67.7                  | 1                          | I                      |
| 15   | 9      | 7      | -       | 16    | 9       | 8       | -        | 1098.7796                  | 73.1                  | 1                          | I                      |
| 17   | 2      | 16     | +       | 18    | 2       | 17      | +        | 1098.8041                  | 22.4                  | -1                         | I                      |
| 17   | 2      | 16     | -       | 18    | 2       | 17      | -        | 1098.8041                  | 22.4                  | 2                          | I                      |
| 16   | 2      | 14     | -       | 17    | 2       | 15      | -        | 1098.8242                  | 45.0                  | 1                          | I                      |
| 16   | 2      | 14     | +       | 17    | 2       | 15      | +        | 1098.8270                  | 42.7                  | 0                          | I                      |
| 14   | 11     | 3      | +       | 15    | 11      | 4       | +        | 1098.8445                  | 83.2                  | -1                         | I                      |
| 14   | 11     | 3      | -       | 15    | 11      | 4       | -        | 1098.8712                  | 84.4                  | 1                          | I                      |
| 16   | 5      | 11     | -       | 17    | 5       | 12      | -        | 1098.8799                  | 43.1                  | -10                        | I                      |
| 16   | 3      | 13     | -       | 17    | 3       | 14      | -        | 1098.8880                  | 48.2                  | 0                          | I                      |
| 16   | 3      | 13     | +       | 17    | 3       | 14      | +        | 1098.8918                  | 46.0                  | 0                          | I                      |
| 32   | 26     | 6      | +       | 32    | 26      | 7       | +        | 1098.8974                  | 80.7                  | -2                         | II                     |
| 39   | 25     | 15     | +       | 39    | 25      | 14      | +        | 1098.9128                  | 87.9                  | -1                         | II                     |
| 32   | 26     | 6      | -       | 32    | 26      | 7       | -        | 1098.9155                  | 83.2                  | -1                         | II                     |
| 16   | 4      | 12     | +       | 17    | 4       | 13      | +        | 1098.9635                  | 29.9                  | -4                         | I                      |
| 16   | 4      | 12     | -       | 17    | 4       | 13      | -        | 1098.9635                  | 29.9                  | 4                          | I                      |
| 31   | 26     | 6      | +       | 31    | 26      | 5       | +        | 1098.9844                  | 87.1                  | 0                          | II                     |
| 31   | 26     | 6      | -       | 31    | 26      | 5       | -        | 1099.0038                  | 71.0                  | 10                         | II                     |
| 15   | 8      | 8      | +       | 16    | 8       | 9       | +        | 1099.0087                  | 66.8                  | 0                          | I                      |
| 15   | 8      | 8      | -       | 16    | 8       | 9       | -        | 1099.0200                  | 68.2                  | 1                          | I                      |
| 30   | 26     | 4      | -       | 30    | 26      | 5       | -        | 1099.0869                  | 76.4                  | -4                         | II                     |
| 43   | 24     | 20     | -       | 43    | 24      | 19      | -        | 1099.1290                  | 77.3                  | -6                         | II                     |
| 37   | 25     | 13     | -       | 37    | 25      | 12      | -        | 1099.1422                  | 87.1                  | 0                          | II                     |
| 14   | 10     | 4      | +       | 15    | 10      | 5       | +        | 1099.1489                  | 76.7                  | -1                         | I                      |
| 13   | 12     | 2      | +       | 14    | 12      | 3       | +        | 1099.1646                  | 92.2                  | -1                         | I                      |
| 14   | 10     | 4      | -       | 15    | 10      | 5       | -        | 1099.1708                  | 79.9                  | 1                          | I                      |
| 13   | 12     | 2      | -       | 14    | 12      | 3       | -        | 1099.2008                  | 92.5                  | 1                          | I                      |
| 15   | 7      | 9      | +       | 16    | 7       | 10      | +        | 1099.2221                  | 62.0                  | 0                          | I                      |
| 15   | 7      | 9      | -       | 16    | 7       | 10      | -        | 1099.2320                  | 21.5                  | 20                         | I                      |
| 16   | 1      | 15     | -       | 17    | 1       | 16      | -        | 1099.2320                  | 21.5                  | -4                         | I                      |
| 16   | 1      | 15     | +       | 17    | 1       | 16      | +        | 1099.2320                  | 21.5                  | 1                          | I                      |
| 27   | 26     | 2      | +       | 27    | 26      | 1       | +        | 1099.3039                  | 74.8                  | 0                          | II                     |
| 27   | 26     | 2      | -       | 27    | 26      | 1       | -        | 1099.3245                  | 79.6                  | 2                          | II                     |
| 35   | 25     | 11     | +       | 35    | 25      | 10      | +        | 1099.3296                  | 86.1                  | 1                          | II                     |
| 35   | 25     | 11     | -       | 35    | 25      | 10      | -        | 1099.3460                  | 69.1                  | 6                          | II                     |
| 17   | 1      | 17     | -       | 18    | 1       | 18      | -        | 1099.3525                  | 20.9                  | 0                          | I                      |
| 17   | 1      | 17     | +       | 18    | 1       | 18      | +        | 1099.3525                  | 20.9                  | 0                          | I                      |
| 41   | 24     | 18     | -       | 41    | 24      | 17      | -        | 1099.3706                  | 90.0                  | -3                         | II                     |
| 26   | 26     | 0      | +       | 26    | 26      | 1       | +        | 1099.3766                  | 40.0                  | -2                         | II                     |
| 26   | 26     | 0      | -       | 26    | 26      | 1       | -        | 1099.3979                  | 64.1                  | 0                          | II                     |

| $N'$ | $K'_a$ | $K'_c$ | $J'^a)$ | $N''$ | $K''_a$ | $K''_c$ | $J''^b)$ | $\nu$ , exp. <sup>c)</sup> | Transm. <sup>d)</sup> | $\delta_\nu$ <sup>e)</sup> | Spectrum <sup>f)</sup> |
|------|--------|--------|---------|-------|---------|---------|----------|----------------------------|-----------------------|----------------------------|------------------------|
|      |        | 1      |         |       |         | 2       |          | 3                          | 4                     | 5                          | 6                      |
| 21   | 1      | 21     | +       | 21    | 1       | 20      | +        | 1099.4035                  | 57.0                  | -5                         | I                      |
| 15   | 6      | 10     | +       | 16    | 6       | 11      | +        | 1099.4035                  | 57.0                  | 0                          | I                      |
| 15   | 6      | 10     | -       | 16    | 6       | 11      | -        | 1099.4085                  | 59.4                  | 1                          | I                      |
| 14   | 9      | 5      | +       | 15    | 9       | 6       | +        | 1099.4240                  | 73.7                  | 0                          | I                      |
| 14   | 9      | 5      | -       | 15    | 9       | 6       | -        | 1099.4411                  | 75.4                  | 1                          | I                      |
| 25   | 2      | 24     | -       | 25    | 2       | 23      | -        | 1099.4991                  | 86.1                  | -6                         | I                      |
| 13   | 11     | 3      | +       | 14    | 11      | 4       | +        | 1099.4991                  | 86.1                  | -1                         | I                      |
| 33   | 25     | 9      | +       | 33    | 25      | 8       | +        | 1099.5207                  | 77.4                  | 0                          | II                     |
| 13   | 11     | 3      | -       | 14    | 11      | 4       | -        | 1099.5293                  | 87.0                  | 1                          | I                      |
| 15   | 5      | 11     | +       | 16    | 5       | 12      | +        | 1099.5505                  | 49.2                  | 2                          | I                      |
| 15   | 5      | 11     | -       | 16    | 5       | 12      | -        | 1099.5526                  | 51.5                  | 0                          | I                      |
| 39   | 24     | 16     | +       | 39    | 24      | 15      | +        | 1099.5865                  | 91.0                  | -3                         | II                     |
| 39   | 24     | 16     | -       | 39    | 24      | 15      | -        | 1099.6004                  | 82.9                  | -3                         | II                     |
| 32   | 25     | 7      | +       | 32    | 25      | 8       | +        | 1099.6121                  | 82.6                  | 1                          | II                     |
| 32   | 25     | 7      | -       | 32    | 25      | 8       | -        | 1099.6290                  | 75.0                  | 0                          | II                     |
| 15   | 4      | 12     | +       | 16    | 4       | 13      | +        | 1099.6631                  | 28.0                  | 1                          | I                      |
| 15   | 4      | 12     | -       | 16    | 4       | 13      | -        | 1099.6631                  | 28.0                  | 0                          | I                      |
| 14   | 8      | 6      | +       | 15    | 8       | 7       | +        | 1099.6690                  | 67.5                  | 0                          | I                      |
| 14   | 8      | 6      | -       | 15    | 8       | 7       | -        | 1099.6819                  | 69.7                  | 1                          | I                      |
| 31   | 25     | 7      | +       | 31    | 25      | 6       | +        | 1099.7004                  | 56.7                  | -1                         | II                     |
| 38   | 24     | 14     | -       | 38    | 24      | 15      | -        | 1099.7112                  | 87.2                  | -1                         | II                     |
| 31   | 25     | 7      | -       | 31    | 25      | 6       | -        | 1099.7182                  | 83.5                  | 3                          | II                     |
| 43   | 23     | 21     | +       | 43    | 23      | 20      | +        | 1099.7552                  | 89.3                  | -3                         | II                     |
| 43   | 23     | 21     | -       | 43    | 23      | 20      | -        | 1099.7674                  | 91.5                  | -5                         | II                     |
| 15   | 3      | 13     | +       | 16    | 3       | 14      | +        | 1099.7864                  | 27.5                  | -1                         | I                      |
| 15   | 3      | 13     | -       | 16    | 3       | 14      | -        | 1099.7864                  | 27.5                  | 5                          | I                      |
| 13   | 10     | 4      | +       | 14    | 10      | 5       | +        | 1099.8043                  | 80.0                  | 1                          | I                      |
| 12   | 12     | 0      | +       | 13    | 12      | 1       | +        | 1099.8151                  | 94.7                  | 0                          | I                      |
| 13   | 10     | 4      | -       | 14    | 10      | 5       | -        | 1099.8289                  | 83.0                  | 1                          | I                      |
| 29   | 25     | 5      | +       | 29    | 25      | 4       | +        | 1099.8692                  | 76.3                  | 1                          | II                     |
| 14   | 7      | 7      | +       | 15    | 7       | 8       | +        | 1099.8835                  | 63.1                  | 0                          | I                      |
| 29   | 25     | 5      | -       | 29    | 25      | 4       | -        | 1099.8877                  | 45.7                  | 4                          | II                     |
| 14   | 7      | 7      | -       | 15    | 7       | 8       | -        | 1099.8928                  | 64.8                  | 1                          | I                      |
| 36   | 24     | 12     | +       | 36    | 24      | 13      | +        | 1099.9092                  | 85.1                  | 2                          | II                     |
| 16   | 0      | 16     | +       | 17    | 0       | 17      | +        | 1099.9374                  | 21.7                  | 2                          | I                      |
| 16   | 0      | 16     | -       | 17    | 0       | 17      | -        | 1099.9374                  | 21.7                  | -2                         | I                      |
| 28   | 25     | 3      | +       | 28    | 25      | 4       | +        | 1099.9492                  | 75.5                  | 1                          | II                     |
| 28   | 25     | 3      | -       | 28    | 25      | 4       | -        | 1099.9680                  | 78.5                  | 2                          | II                     |
| 41   | 23     | 19     | +       | 41    | 23      | 18      | +        | 1100.0004                  | 54.5                  | 0                          | II                     |
| 41   | 23     | 19     | -       | 41    | 23      | 18      | -        | 1100.0132                  | 52.7                  | 1                          | II                     |
| 27   | 25     | 3      | +       | 27    | 25      | 2       | +        | 1100.0262                  | 68.2                  | -2                         | II                     |
| 35   | 24     | 12     | -       | 35    | 24      | 11      | -        | 1100.0262                  | 68.2                  | 6                          | II                     |
| 27   | 25     | 3      | -       | 27    | 25      | 2       | -        | 1100.0450                  | 62.1                  | -5                         | II                     |
| 15   | 2      | 14     | -       | 16    | 2       | 15      | -        | 1100.0651                  | 19.6                  | 4                          | I                      |
| 15   | 2      | 14     | +       | 16    | 2       | 15      | +        | 1100.0651                  | 19.6                  | 0                          | I                      |
| 14   | 6      | 8      | +       | 15    | 6       | 9       | +        | 1100.0651                  | 19.6                  | -14                        | I                      |
| 14   | 6      | 8      | -       | 15    | 6       | 9       | -        | 1100.0724                  | 59.7                  | 1                          | I                      |
| 13   | 9      | 5      | +       | 14    | 9       | 6       | +        | 1100.0799                  | 75.0                  | 1                          | I                      |
| 13   | 9      | 5      | -       | 14    | 9       | 6       | -        | 1100.0996                  | 73.2                  | 3                          | I                      |
| 26   | 25     | 1      | +       | 26    | 25      | 2       | +        | 1100.0996                  | 73.2                  | -11                        | I                      |
| 34   | 24     | 10     | +       | 34    | 24      | 11      | +        | 1100.1095                  | 82.2                  | 1                          | II                     |
| 26   | 25     | 1      | -       | 26    | 25      | 2       | -        | 1100.1204                  | 86.5                  | -1                         | I                      |
| 34   | 24     | 10     | -       | 34    | 24      | 11      | -        | 1100.1247                  | 82.1                  | 1                          | II                     |
| 12   | 11     | 1      | +       | 13    | 11      | 2       | +        | 1100.1501                  | 90.5                  | 0                          | I                      |
| 25   | 25     | 1      | +       | 25    | 25      | 0       | +        | 1100.1722                  | 67.2                  | 0                          | II                     |
| 47   | 6      | 42     | +       | 47    | 6       | 41      | +        | 1100.1725                  | 96.9                  | -10                        | I                      |
| 12   | 11     | 1      | -       | 13    | 11      | 2       | -        | 1100.1847                  | 89.7                  | 1                          | I                      |
| 14   | 2      | 12     | -       | 15    | 2       | 13      | -        | 1100.1908                  | 46.7                  | 1                          | I                      |
| 14   | 2      | 12     | +       | 15    | 2       | 13      | +        | 1100.1943                  | 44.5                  | 0                          | I                      |
| 33   | 24     | 10     | +       | 33    | 24      | 9       | +        | 1100.2052                  | 77.7                  | 0                          | II                     |
| 14   | 5      | 9      | +       | 15    | 5       | 10      | +        | 1100.2155                  | 53.3                  | 1                          | I                      |
| 14   | 5      | 9      | -       | 15    | 5       | 10      | -        | 1100.2184                  | 54.6                  | 1                          | I                      |
| 39   | 23     | 17     | -       | 39    | 23      | 16      | -        | 1100.2463                  | 86.2                  | -2                         | II                     |
| 14   | 3      | 11     | -       | 15    | 3       | 12      | -        | 1100.3021                  | 49.0                  | 2                          | I                      |
| 14   | 3      | 11     | +       | 15    | 3       | 12      | +        | 1100.3049                  | 46.4                  | 0                          | I                      |
| 14   | 4      | 10     | -       | 15    | 4       | 11      | -        | 1100.3190                  | 29.6                  | -1                         | I                      |
| 14   | 4      | 10     | +       | 15    | 4       | 11      | +        | 1100.3190                  | 29.6                  | 2                          | I                      |
| 13   | 8      | 6      | +       | 14    | 8       | 7       | +        | 1100.3256                  | 69.4                  | 0                          | I                      |
| 13   | 8      | 6      | -       | 14    | 8       | 7       | -        | 1100.3406                  | 70.6                  | 1                          | I                      |
| 38   | 23     | 15     | -       | 38    | 23      | 16      | -        | 1100.3585                  | 86.9                  | -2                         | II                     |
| 31   | 24     | 8      | +       | 31    | 24      | 7       | +        | 1100.3883                  | 79.5                  | 1                          | II                     |
| 31   | 24     | 8      | -       | 31    | 24      | 7       | -        | 1100.4047                  | 79.8                  | 2                          | II                     |

| $N'$ | $K'_a$ | $K'_c$ | $J'^a)$ | $N''$ | $K''_a$ | $K''_c$ | $J''^b)$ | $\nu$ , exp. <sup>c)</sup> | Transm. <sup>d)</sup> | $\delta_\nu$ <sup>e)</sup> | Spectrum <sup>f)</sup> |
|------|--------|--------|---------|-------|---------|---------|----------|----------------------------|-----------------------|----------------------------|------------------------|
|      |        | 1      |         |       |         | 2       |          | 3                          | 4                     | 5                          | 6                      |
| 12   | 10     | 2      | +       | 13    | 10      | 3       | +        | 1100.4558                  | 83.2                  | 0                          | I                      |
| 14   | 1      | 13     | -       | 15    | 1       | 14      | -        | 1100.4669                  | 24.6                  | 1                          | I                      |
| 14   | 1      | 13     | +       | 15    | 1       | 14      | +        | 1100.4669                  | 24.6                  | -3                         | I                      |
| 30   | 24     | 6      | +       | 30    | 24      | 7       | +        | 1100.4750                  | 65.1                  | -5                         | II                     |
| 12   | 10     | 2      | -       | 13    | 10      | 3       | -        | 1100.4841                  | 85.1                  | 0                          | I                      |
| 30   | 24     | 6      | -       | 30    | 24      | 7       | -        | 1100.4926                  | 50.1                  | 5                          | II                     |
| 13   | 7      | 7      | +       | 14    | 7       | 8       | +        | 1100.5412                  | 65.2                  | 1                          | I                      |
| 13   | 7      | 7      | -       | 14    | 7       | 8       | -        | 1100.5520                  | 65.6                  | 1                          | I                      |
| 29   | 24     | 6      | +       | 29    | 24      | 5       | +        | 1100.5609                  | 52.3                  | 11                         | II                     |
| 36   | 23     | 13     | +       | 36    | 23      | 14      | +        | 1100.5609                  | 52.3                  | 1                          | II                     |
| 15   | 1      | 15     | -       | 16    | 1       | 16      | -        | 1100.5688                  | 21.3                  | 1                          | I                      |
| 15   | 1      | 15     | +       | 16    | 1       | 16      | +        | 1100.5688                  | 21.3                  | 0                          | I                      |
| 29   | 24     | 6      | -       | 29    | 24      | 5       | -        | 1100.5769                  | 71.8                  | 1                          | II                     |
| 41   | 22     | 20     | +       | 41    | 22      | 19      | +        | 1100.6166                  | 62.9                  | 2                          | II                     |
| 41   | 22     | 20     | -       | 41    | 22      | 19      | -        | 1100.6288                  | 56.1                  | 5                          | II                     |
| 28   | 24     | 4      | +       | 28    | 24      | 5       | +        | 1100.6413                  | 71.2                  | 1                          | II                     |
| 28   | 24     | 4      | -       | 28    | 24      | 5       | -        | 1100.6589                  | 67.8                  | 1                          | II                     |
| 35   | 23     | 13     | +       | 35    | 23      | 12      | +        | 1100.6640                  | 80.4                  | 1                          | II                     |
| 35   | 23     | 13     | -       | 35    | 23      | 12      | -        | 1100.6787                  | 55.4                  | 7                          | II                     |
| 64   | 14     | 50     | -       | 64    | 14      | 51      | -        | 1100.6847                  | 79.3                  | -3                         | II                     |
| 27   | 24     | 4      | +       | 27    | 24      | 3       | +        | 1100.7199                  | 62.4                  | 2                          | II                     |
| 13   | 6      | 8      | +       | 14    | 6       | 9       | +        | 1100.7257                  | 59.4                  | 0                          | I                      |
| 13   | 6      | 8      | -       | 14    | 6       | 9       | -        | 1100.7326                  | 51.2                  | -1                         | I                      |
| 12   | 9      | 3      | +       | 13    | 9       | 4       | +        | 1100.7326                  | 51.2                  | 5                          | I                      |
| 27   | 24     | 4      | -       | 27    | 24      | 3       | -        | 1100.7401                  | 19.9                  | 23                         | II                     |
| 12   | 9      | 3      | -       | 13    | 9       | 4       | -        | 1100.7547                  | 79.6                  | 1                          | I                      |
| 34   | 23     | 11     | +       | 34    | 23      | 12      | +        | 1100.7639                  | 69.6                  | -4                         | II                     |
| 34   | 23     | 11     | -       | 34    | 23      | 12      | -        | 1100.7788                  | 61.8                  | 2                          | II                     |
| 11   | 11     | 1      | +       | 12    | 11      | 2       | +        | 1100.7974                  | 42.6                  | -2                         | II                     |
| 26   | 24     | 2      | +       | 26    | 24      | 3       | +        | 1100.7974                  | 42.6                  | 19                         | II                     |
| 26   | 24     | 2      | -       | 26    | 24      | 3       | -        | 1100.8142                  | 68.2                  | 2                          | II                     |
| 19   | 1      | 19     | +       | 19    | 1       | 18      | +        | 1100.8269                  | 94.1                  | -1                         | I                      |
| 11   | 11     | 1      | -       | 12    | 11      | 2       | -        | 1100.8369                  | 92.8                  | -3                         | I                      |
| 33   | 23     | 11     | +       | 33    | 23      | 10      | +        | 1100.8618                  | 75.9                  | 1                          | II                     |
| 39   | 22     | 18     | -       | 39    | 22      | 17      | -        | 1100.8647                  | 86.7                  | -3                         | II                     |
| 25   | 24     | 2      | +       | 25    | 24      | 1       | +        | 1100.8684                  | 59.7                  | 1                          | II                     |
| 13   | 5      | 9      | +       | 14    | 5       | 10      | +        | 1100.8773                  | 54.8                  | 0                          | I                      |
| 33   | 23     | 11     | -       | 33    | 23      | 10      | -        | 1100.8773                  | 54.8                  | 5                          | I                      |
| 13   | 5      | 9      | -       | 14    | 5       | 10      | -        | 1100.8811                  | 57.2                  | 1                          | I                      |
| 25   | 24     | 2      | -       | 25    | 24      | 1       | -        | 1100.8874                  | 56.5                  | 0                          | II                     |
| 63   | 14     | 50     | -       | 63    | 14      | 49      | -        | 1100.8912                  | 81.9                  | -2                         | II                     |
| 24   | 24     | 0      | +       | 24    | 24      | 1       | +        | 1100.9384                  | 60.1                  | 1                          | II                     |
| 24   | 24     | 0      | -       | 24    | 24      | 1       | -        | 1100.9581                  | 60.5                  | 0                          | II                     |
| 38   | 22     | 16     | +       | 38    | 22      | 17      | +        | 1100.9665                  | 83.8                  | 0                          | II                     |
| 32   | 23     | 9      | -       | 32    | 23      | 10      | -        | 1100.9718                  | 62.0                  | 8                          | II                     |
| 12   | 8      | 4      | +       | 13    | 8       | 5       | +        | 1100.9787                  | 72.2                  | 1                          | I                      |
| 13   | 4      | 10     | +       | 14    | 4       | 11      | +        | 1100.9952                  | 31.4                  | 9                          | I                      |
| 13   | 4      | 10     | -       | 14    | 4       | 11      | -        | 1100.9952                  | 31.4                  | -3                         | I                      |
| 12   | 8      | 4      | -       | 13    | 8       | 5       | -        | 1100.9952                  | 31.4                  | -7                         | I                      |
| 31   | 23     | 9      | +       | 31    | 23      | 8       | +        | 1101.0475                  | 43.7                  | -2                         | II                     |
| 31   | 23     | 9      | -       | 31    | 23      | 8       | -        | 1101.0630                  | 77.4                  | 1                          | II                     |
| 37   | 22     | 16     | +       | 37    | 22      | 15      | +        | 1101.0768                  | 73.2                  | -4                         | II                     |
| 42   | 21     | 21     | +       | 42    | 21      | 22      | +        | 1101.0814                  | 77.6                  | 1                          | II                     |
| 13   | 3      | 11     | +       | 14    | 3       | 12      | +        | 1101.1017                  | 27.1                  | 0                          | I                      |
| 13   | 3      | 11     | -       | 14    | 3       | 12      | -        | 1101.1017                  | 27.1                  | 3                          | I                      |
| 14   | 0      | 14     | +       | 15    | 0       | 15      | +        | 1101.1338                  | 23.4                  | 2                          | I                      |
| 14   | 0      | 14     | -       | 15    | 0       | 15      | -        | 1101.1338                  | 23.4                  | -2                         | I                      |
| 30   | 23     | 7      | -       | 30    | 23      | 8       | -        | 1101.1522                  | 60.3                  | 4                          | II                     |
| 23   | 2      | 22     | -       | 23    | 2       | 21      | -        | 1101.1747                  | 98.0                  | -10                        | I                      |
| 12   | 7      | 5      | +       | 13    | 7       | 6       | +        | 1101.1952                  | 67.2                  | 1                          | I                      |
| 12   | 7      | 5      | -       | 13    | 7       | 6       | -        | 1101.2079                  | 69.9                  | 1                          | I                      |
| 41   | 21     | 21     | -       | 41    | 21      | 20      | -        | 1101.2165                  | 52.8                  | -2                         | II                     |
| 29   | 23     | 7      | +       | 29    | 23      | 6       | +        | 1101.2219                  | 53.5                  | 0                          | II                     |
| 23   | 2      | 22     | +       | 23    | 2       | 21      | +        | 1101.2273                  | 55.0                  | 7                          | II                     |
| 29   | 23     | 7      | -       | 29    | 23      | 6       | -        | 1101.2380                  | 70.9                  | 1                          | II                     |
| 35   | 22     | 14     | +       | 35    | 22      | 13      | +        | 1101.2897                  | 80.1                  | 0                          | II                     |
| 35   | 22     | 14     | -       | 35    | 22      | 13      | -        | 1101.3025                  | 57.3                  | -2                         | II                     |
| 28   | 23     | 5      | +       | 28    | 23      | 6       | +        | 1101.3047                  | 59.9                  | 0                          | II                     |
| 28   | 23     | 5      | -       | 28    | 23      | 6       | -        | 1101.3203                  | 41.2                  | -8                         | II                     |
| 13   | 2      | 12     | -       | 14    | 2       | 13      | -        | 1101.3251                  | 25.5                  | 3                          | I                      |
| 13   | 2      | 12     | +       | 14    | 2       | 13      | +        | 1101.3251                  | 25.5                  | -2                         | I                      |
| 11   | 9      | 3      | +       | 12    | 9       | 4       | +        | 1101.3809                  | 52.7                  | 3                          | I                      |

| $N'$ | $K'_a$ | $K'_c$ | $J'^a)$ | $N''$ | $K''_a$ | $K''_c$ | $J''^b)$ | $\nu$ , exp. <sup>c)</sup> | Transm. <sup>d)</sup> | $\delta_\nu$ <sup>e)</sup> | Spectrum <sup>f)</sup> |
|------|--------|--------|---------|-------|---------|---------|----------|----------------------------|-----------------------|----------------------------|------------------------|
|      |        | 1      |         |       |         | 2       |          | 3                          | 4                     | 5                          | 6                      |
| 12   | 6      | 6      | +       | 13    | 6       | 7       | +        | 1101.3809                  | 52.7                  | -1                         | I                      |
| 27   | 23     | 5      | +       | 27    | 23      | 4       | +        | 1101.3845                  | 52.6                  | 0                          | II                     |
| 12   | 6      | 6      | -       | 13    | 6       | 7       | -        | 1101.3895                  | 64.3                  | 1                          | I                      |
| 27   | 23     | 5      | -       | 27    | 23      | 4       | -        | 1101.4014                  | 60.1                  | 0                          | II                     |
| 11   | 9      | 3      | -       | 12    | 9       | 4       | -        | 1101.4070                  | 82.3                  | 1                          | II                     |
| 39   | 21     | 19     | +       | 39    | 21      | 18      | +        | 1101.4449                  | 85.1                  | -2                         | II                     |
| 39   | 21     | 19     | -       | 39    | 21      | 18      | -        | 1101.4561                  | 86.2                  | -4                         | II                     |
| 26   | 23     | 3      | +       | 26    | 23      | 4       | +        | 1101.4616                  | 55.0                  | 1                          | II                     |
| 26   | 23     | 3      | -       | 26    | 23      | 4       | -        | 1101.4789                  | 61.7                  | 0                          | II                     |
| 60   | 14     | 46     | -       | 60    | 14      | 47      | -        | 1101.4902                  | 66.2                  | 2                          | II                     |
| 33   | 22     | 12     | +       | 33    | 22      | 11      | +        | 1101.4902                  | 66.2                  | -1                         | II                     |
| 33   | 22     | 12     | -       | 33    | 22      | 11      | -        | 1101.5045                  | 40.9                  | 6                          | II                     |
| 12   | 5      | 7      | +       | 13    | 5       | 8       | +        | 1101.5345                  | 54.3                  | 0                          | I                      |
| 12   | 5      | 7      | -       | 13    | 5       | 8       | -        | 1101.5393                  | 59.7                  | 1                          | I                      |
| 25   | 23     | 3      | -       | 25    | 23      | 2       | -        | 1101.5535                  | 37.1                  | 1                          | II                     |
| 12   | 2      | 10     | -       | 13    | 2       | 11      | -        | 1101.5661                  | 49.6                  | 0                          | I                      |
| 12   | 2      | 10     | +       | 13    | 2       | 11      | +        | 1101.5700                  | 47.0                  | 0                          | I                      |
| 32   | 22     | 10     | +       | 32    | 22      | 11      | +        | 1101.5862                  | 68.6                  | 1                          | II                     |
| 32   | 22     | 10     | -       | 32    | 22      | 11      | -        | 1101.6002                  | 66.6                  | 2                          | II                     |
| 24   | 23     | 1      | +       | 24    | 23      | 2       | +        | 1101.6068                  | 53.1                  | 1                          | II                     |
| 24   | 23     | 1      | -       | 24    | 23      | 2       | -        | 1101.6252                  | 18.1                  | 1                          | II                     |
| 11   | 8      | 4      | +       | 12    | 8       | 5       | +        | 1101.6279                  | 75.2                  | 0                          | I                      |
| 61   | 13     | 49     | -       | 61    | 13      | 48      | -        | 1101.6413                  | 78.4                  | -1                         | II                     |
| 12   | 4      | 8      | +       | 13    | 4       | 9       | +        | 1101.6501                  | 42.0                  | 3                          | I                      |
| 12   | 4      | 8      | -       | 13    | 4       | 9       | -        | 1101.6501                  | 42.0                  | -13                        | I                      |
| 11   | 8      | 4      | -       | 12    | 8       | 5       | -        | 1101.6501                  | 42.0                  | 18                         | I                      |
| 23   | 23     | 1      | +       | 23    | 23      | 0       | +        | 1101.6747                  | 38.2                  | -2                         | II                     |
| 12   | 3      | 9      | +       | 13    | 3       | 10      | +        | 1101.6828                  | 40.6                  | -8                         | I                      |
| 37   | 21     | 17     | -       | 37    | 21      | 16      | -        | 1101.6832                  | 40.6                  | -10                        | I                      |
| 31   | 22     | 10     | -       | 31    | 22      | 9       | -        | 1101.6937                  | 40.4                  | 6                          | II                     |
| 23   | 23     | 1      | -       | 23    | 23      | 0       | -        | 1101.6937                  | 40.4                  | -2                         | II                     |
| 12   | 1      | 11     | -       | 13    | 1       | 12      | -        | 1101.7223                  | 33.4                  | 7                          | I                      |
| 12   | 1      | 11     | +       | 13    | 1       | 12      | +        | 1101.7223                  | 33.4                  | -9                         | I                      |
| 10   | 10     | 0      | +       | 11    | 10      | 1       | +        | 1101.7480                  | 93.4                  | 2                          | I                      |
| 62   | 12     | 50     | +       | 62    | 12      | 51      | +        | 1101.7543                  | 95.3                  | -17                        | II                     |
| 62   | 12     | 50     | -       | 62    | 12      | 51      | -        | 1101.7614                  | 45.2                  | 3                          | II                     |
| 30   | 22     | 8      | +       | 30    | 22      | 9       | +        | 1101.7690                  | 60.8                  | 2                          | II                     |
| 13   | 1      | 13     | -       | 14    | 1       | 14      | -        | 1101.7773                  | 20.1                  | 0                          | I                      |
| 13   | 1      | 13     | +       | 14    | 1       | 14      | +        | 1101.7773                  | 20.1                  | -1                         | I                      |
| 10   | 10     | 0      | -       | 11    | 10      | 1       | -        | 1101.7864                  | 92.9                  | 2                          | I                      |
| 36   | 21     | 15     | -       | 36    | 21      | 16      | -        | 1101.7938                  | 55.6                  | 2                          | II                     |
| 63   | 11     | 53     | -       | 63    | 11      | 52      | -        | 1101.8197                  | 66.1                  | -4                         | II                     |
| 60   | 13     | 47     | -       | 60    | 13      | 48      | -        | 1101.8400                  | 75.8                  | 9                          | II                     |
| 11   | 7      | 5      | +       | 12    | 7       | 6       | +        | 1101.8454                  | 69.2                  | 0                          | I                      |
| 11   | 7      | 5      | -       | 12    | 7       | 6       | -        | 1101.8605                  | 71.3                  | 1                          | I                      |
| 29   | 22     | 8      | -       | 29    | 22      | 7       | -        | 1101.8707                  | 64.1                  | 1                          | II                     |
| 63   | 10     | 54     | -       | 63    | 10      | 53      | -        | 1101.8769                  | 96.8                  | 8                          | II                     |
| 35   | 21     | 15     | +       | 35    | 21      | 14      | +        | 1101.8876                  | 71.1                  | -2                         | II                     |
| 35   | 21     | 15     | -       | 35    | 21      | 14      | -        | 1101.8999                  | 69.7                  | -1                         | II                     |
| 28   | 22     | 6      | +       | 28    | 22      | 7       | +        | 1101.9400                  | 60.4                  | 2                          | II                     |
| 28   | 22     | 6      | -       | 28    | 22      | 7       | -        | 1101.9551                  | 60.2                  | 1                          | II                     |
| 61   | 12     | 50     | +       | 61    | 12      | 49      | +        | 1101.9551                  | 60.2                  | -12                        | II                     |
| 61   | 12     | 50     | -       | 61    | 12      | 49      | -        | 1101.9594                  | 94.2                  | -20                        | II                     |
| 66   | 10     | 56     | -       | 66    | 10      | 57      | -        | 1101.9642                  | 11.7                  | -7                         | II                     |
| 34   | 21     | 13     | +       | 34    | 21      | 14      | +        | 1101.9908                  | 53.8                  | -1                         | II                     |
| 34   | 21     | 13     | -       | 34    | 21      | 14      | -        | 1102.0033                  | 68.4                  | 1                          | II                     |
| 39   | 20     | 20     | +       | 39    | 20      | 19      | +        | 1102.0100                  | 75.8                  | -3                         | II                     |
| 45   | 6      | 40     | -       | 45    | 6       | 39      | -        | 1102.0155                  | 92.7                  | 2                          | I                      |
| 27   | 22     | 6      | +       | 27    | 22      | 5       | +        | 1102.0208                  | 48.3                  | 0                          | II                     |
| 10   | 9      | 1      | +       | 11    | 9       | 2       | +        | 1102.0253                  | 85.9                  | -1                         | I                      |
| 11   | 6      | 6      | +       | 12    | 6       | 7       | +        | 1102.0324                  | 64.8                  | 0                          | I                      |
| 27   | 22     | 6      | -       | 27    | 22      | 5       | -        | 1102.0368                  | 33.0                  | 3                          | II                     |
| 55   | 15     | 41     | -       | 55    | 15      | 40      | -        | 1102.0368                  | 33.0                  | 0                          | II                     |
| 11   | 6      | 6      | -       | 12    | 6       | 7       | -        | 1102.0427                  | 66.8                  | 1                          | II                     |
| 10   | 9      | 1      | -       | 11    | 9       | 2       | -        | 1102.0565                  | 87.6                  | 1                          | I                      |
| 62   | 11     | 51     | +       | 62    | 11      | 52      | +        | 1102.0635                  | 53.9                  | -4                         | II                     |
| 62   | 11     | 51     | -       | 62    | 11      | 52      | -        | 1102.0674                  | 61.4                  | -18                        | II                     |
| 33   | 21     | 13     | +       | 33    | 21      | 12      | +        | 1102.0902                  | 28.4                  | -8                         | II                     |
| 26   | 22     | 4      | +       | 26    | 22      | 5       | +        | 1102.0990                  | 54.1                  | 1                          | II                     |
| 33   | 21     | 13     | -       | 33    | 21      | 12      | -        | 1102.1035                  | 60.7                  | -2                         | II                     |
| 26   | 22     | 4      | -       | 26    | 22      | 5       | -        | 1102.1151                  | 57.0                  | 0                          | II                     |
| 38   | 20     | 18     | +       | 38    | 20      | 19      | +        | 1102.1270                  | 23.2                  | 2                          | II                     |

| $N'$ | $K'_a$ | $K'_c$ | $J'^a)$ | $N''$ | $K''_a$ | $K''_c$ | $J''^b)$ | $\nu$ , exp. <sup>c)</sup> | Transm. <sup>d)</sup> | $\delta_\nu$ <sup>e)</sup> | Spectrum <sup>f)</sup> |
|------|--------|--------|---------|-------|---------|---------|----------|----------------------------|-----------------------|----------------------------|------------------------|
|      |        | 1      |         |       |         | 2       |          | 3                          | 4                     | 5                          | 6                      |
| 60   | 12     | 48     | +       | 60    | 12      | 49      | +        | 1102.1578                  | 93.1                  | 8                          | II                     |
| 25   | 22     | 4      | +       | 25    | 22      | 3       | +        | 1102.1742                  | 40.2                  | 1                          | II                     |
| 11   | 5      | 7      | +       | 12    | 5       | 8       | +        | 1102.1878                  | 58.5                  | 1                          | I                      |
| 32   | 21     | 11     | +       | 32    | 21      | 12      | +        | 1102.1878                  | 58.5                  | -7                         | I                      |
| 25   | 22     | 4      | -       | 25    | 22      | 3       | -        | 1102.1939                  | 61.2                  | 28                         | I                      |
| 11   | 5      | 7      | -       | 12    | 5       | 8       | -        | 1102.1939                  | 61.2                  | 0                          | I                      |
| 32   | 21     | 11     | -       | 32    | 21      | 12      | -        | 1102.2041                  | 24.8                  | 31                         | II                     |
| 54   | 15     | 39     | -       | 54    | 15      | 40      | -        | 1102.2122                  | 5.6                   | 9                          | II                     |
| 56   | 14     | 42     | +       | 56    | 14      | 43      | +        | 1102.2355                  | 87.9                  | 11                         | II                     |
| 56   | 14     | 42     | -       | 56    | 14      | 43      | -        | 1102.2402                  | 72.2                  | -1                         | II                     |
| 37   | 20     | 18     | +       | 37    | 20      | 17      | +        | 1102.2402                  | 72.2                  | -1                         | II                     |
| 24   | 22     | 2      | +       | 24    | 22      | 3       | +        | 1102.2463                  | 47.4                  | 1                          | II                     |
| 24   | 22     | 2      | -       | 24    | 22      | 3       | -        | 1102.2634                  | 44.1                  | 1                          | II                     |
| 10   | 8      | 2      | +       | 11    | 8       | 3       | +        | 1102.2736                  | 79.5                  | 1                          | I                      |
| 31   | 21     | 11     | +       | 31    | 21      | 10      | +        | 1102.2824                  | 64.2                  | 2                          | II                     |
| 31   | 21     | 11     | -       | 31    | 21      | 10      | -        | 1102.2977                  | 81.1                  | 23                         | I                      |
| 10   | 8      | 2      | -       | 11    | 8       | 3       | -        | 1102.2977                  | 81.1                  | 1                          | I                      |
| 11   | 4      | 8      | +       | 12    | 4       | 9       | +        | 1102.3097                  | 47.6                  | 0                          | I                      |
| 11   | 4      | 8      | -       | 12    | 4       | 9       | -        | 1102.3123                  | 52.7                  | 0                          | I                      |
| 12   | 0      | 12     | -       | 13    | 0       | 13      | -        | 1102.3170                  | 23.7                  | -3                         | I                      |
| 23   | 22     | 2      | +       | 23    | 22      | 1       | +        | 1102.3170                  | 23.7                  | 15                         | I                      |
| 12   | 0      | 12     | +       | 13    | 0       | 13      | +        | 1102.3170                  | 23.7                  | 2                          | I                      |
| 23   | 22     | 2      | -       | 23    | 22      | 1       | -        | 1102.3331                  | 42.9                  | 0                          | II                     |
| 27   | 3      | 25     | -       | 27    | 3       | 24      | -        | 1102.3421                  | 97.0                  | 1                          | I                      |
| 59   | 12     | 48     | +       | 59    | 12      | 47      | +        | 1102.3514                  | 74.5                  | -2                         | I                      |
| 59   | 12     | 48     | -       | 59    | 12      | 47      | -        | 1102.3572                  | 82.8                  | 5                          | II                     |
| 36   | 20     | 16     | -       | 36    | 20      | 17      | -        | 1102.3616                  | 75.0                  | -3                         | II                     |
| 30   | 21     | 9      | +       | 30    | 21      | 10      | +        | 1102.3718                  | 42.4                  | -15                        | II                     |
| 53   | 15     | 39     | -       | 53    | 15      | 38      | -        | 1102.3818                  | 36.1                  | -6                         | II                     |
| 22   | 22     | 0      | +       | 22    | 22      | 1       | +        | 1102.3818                  | 36.1                  | 0                          | II                     |
| 30   | 21     | 9      | -       | 30    | 21      | 10      | -        | 1102.3868                  | 62.9                  | 0                          | II                     |
| 22   | 22     | 0      | -       | 22    | 22      | 1       | -        | 1102.4000                  | 40.0                  | 0                          | II                     |
| 11   | 3      | 9      | +       | 12    | 3       | 10      | +        | 1102.4095                  | 30.0                  | 1                          | I                      |
| 11   | 3      | 9      | -       | 12    | 3       | 10      | -        | 1102.4095                  | 30.0                  | 0                          | I                      |
| 55   | 14     | 42     | -       | 55    | 14      | 41      | -        | 1102.4187                  | 73.0                  | -9                         | II                     |
| 35   | 20     | 16     | +       | 35    | 20      | 15      | +        | 1102.4580                  | 73.0                  | -3                         | II                     |
| 29   | 21     | 9      | -       | 29    | 21      | 8       | -        | 1102.4753                  | 59.5                  | 1                          | II                     |
| 10   | 7      | 3      | +       | 11    | 7       | 4       | +        | 1102.4917                  | 74.1                  | 0                          | I                      |
| 10   | 7      | 3      | -       | 11    | 7       | 4       | -        | 1102.5097                  | 71.5                  | -1                         | I                      |
| 28   | 21     | 7      | +       | 28    | 21      | 8       | +        | 1102.5468                  | 45.3                  | 2                          | II                     |
| 58   | 12     | 46     | -       | 58    | 12      | 47      | -        | 1102.5493                  | 36.1                  | -2                         | II                     |
| 28   | 21     | 7      | -       | 28    | 21      | 8       | -        | 1102.5585                  | 27.5                  | -22                        | II                     |
| 39   | 19     | 21     | -       | 39    | 19      | 20      | -        | 1102.5585                  | 27.5                  | 5                          | II                     |
| 11   | 2      | 10     | +       | 12    | 2       | 11      | +        | 1102.5845                  | 28.6                  | -2                         | I                      |
| 11   | 2      | 10     | -       | 12    | 2       | 11      | -        | 1102.5845                  | 28.6                  | 3                          | I                      |
| 49   | 16     | 34     | -       | 49    | 16      | 33      | -        | 1102.6168                  | 58.0                  | 0                          | II                     |
| 27   | 21     | 7      | +       | 27    | 21      | 6       | +        | 1102.6287                  | 47.5                  | 0                          | II                     |
| 27   | 21     | 7      | -       | 27    | 21      | 6       | -        | 1102.6429                  | 45.7                  | -3                         | II                     |
| 55   | 8      | 48     | -       | 55    | 8       | 47      | -        | 1102.6429                  | 45.7                  | -11                        | II                     |
| 33   | 20     | 14     | +       | 33    | 20      | 13      | +        | 1102.6640                  | 17.7                  | 0                          | II                     |
| 9    | 9      | 1      | +       | 10    | 9       | 2       | +        | 1102.6641                  | 87.7                  | -22                        | I                      |
| 38   | 19     | 19     | +       | 38    | 19      | 20      | +        | 1102.6660                  | 23.5                  | -1                         | II                     |
| 10   | 6      | 4      | +       | 11    | 6       | 5       | +        | 1102.6799                  | 66.6                  | 0                          | I                      |
| 10   | 6      | 4      | -       | 11    | 6       | 5       | -        | 1102.6924                  | 70.0                  | 0                          | I                      |
| 9    | 9      | 1      | -       | 10    | 9       | 2       | -        | 1102.7037                  | 91.9                  | 4                          | I                      |
| 51   | 15     | 37     | +       | 51    | 15      | 36      | +        | 1102.7081                  | 41.3                  | -2                         | II                     |
| 26   | 21     | 5      | +       | 26    | 21      | 6       | +        | 1102.7081                  | 41.3                  | 3                          | II                     |
| 51   | 15     | 37     | -       | 51    | 15      | 36      | -        | 1102.7148                  | 63.6                  | 0                          | II                     |
| 26   | 21     | 5      | -       | 26    | 21      | 6       | -        | 1102.7227                  | 27.8                  | -1                         | II                     |
| 57   | 12     | 46     | -       | 57    | 12      | 45      | -        | 1102.7376                  | 93.8                  | -1                         | II                     |
| 32   | 20     | 12     | +       | 32    | 20      | 13      | +        | 1102.7623                  | 61.1                  | 0                          | II                     |
| 53   | 14     | 40     | +       | 53    | 14      | 39      | +        | 1102.7623                  | 61.1                  | 5                          | II                     |
| 53   | 14     | 40     | -       | 53    | 14      | 39      | -        | 1102.7674                  | 59.9                  | -4                         | II                     |
| 48   | 16     | 32     | -       | 48    | 16      | 33      | -        | 1102.7706                  | 45.0                  | 3                          | II                     |
| 55   | 13     | 43     | +       | 55    | 13      | 42      | +        | 1102.7706                  | 45.0                  | 5                          | II                     |
| 32   | 20     | 12     | -       | 32    | 20      | 13      | -        | 1102.7743                  | 47.0                  | 1                          | II                     |
| 25   | 21     | 5      | +       | 25    | 21      | 4       | +        | 1102.7841                  | 44.0                  | 1                          | II                     |
| 10   | 5      | 5      | +       | 11    | 5       | 6       | +        | 1102.8368                  | 62.1                  | 0                          | I                      |
| 10   | 5      | 5      | -       | 11    | 5       | 6       | -        | 1102.8447                  | 65.7                  | 1                          | I                      |
| 31   | 20     | 12     | +       | 31    | 20      | 11      | +        | 1102.8572                  | 11.6                  | -3                         | II                     |
| 24   | 21     | 3      | +       | 24    | 21      | 4       | +        | 1102.8572                  | 11.6                  | 0                          | II                     |
| 31   | 20     | 12     | -       | 31    | 20      | 11      | -        | 1102.8696                  | 57.6                  | 0                          | II                     |

| $N'$ | $K'_a$ | $K'_c$ | $J'^a)$ | $N''$ | $K''_a$ | $K''_c$ | $J''^b)$ | $\nu$ , exp. <sup>c)</sup> | Transm. <sup>d)</sup> | $\delta_\nu$ <sup>e)</sup> | Spectrum <sup>f)</sup> |
|------|--------|--------|---------|-------|---------|---------|----------|----------------------------|-----------------------|----------------------------|------------------------|
|      |        | 1      |         |       |         | 2       |          | 3                          | 4                     | 5                          | 6                      |
| 50   | 15     | 35     | +       | 50    | 15      | 36      | +        | 1102.8696                  | 57.6                  | 2                          | II                     |
| 50   | 15     | 35     | -       | 50    | 15      | 36      | -        | 1102.8759                  | 73.4                  | -3                         | I                      |
| 9    | 8      | 2      | +       | 10    | 8       | 3       | +        | 1102.9152                  | 82.0                  | 1                          | II                     |
| 47   | 16     | 32     | -       | 47    | 16      | 31      | -        | 1102.9212                  | 88.1                  | 7                          | II                     |
| 23   | 21     | 3      | +       | 23    | 21      | 2       | +        | 1102.9301                  | 88.3                  | 27                         | I                      |
| 10   | 2      | 8      | -       | 11    | 2       | 9       | -        | 1102.9416                  | 50.8                  | 1                          | I                      |
| 9    | 8      | 2      | -       | 10    | 8       | 3       | -        | 1102.9451                  | 45.1                  | 9                          | I                      |
| 23   | 21     | 3      | -       | 23    | 21      | 2       | -        | 1102.9451                  | 45.1                  | 14                         | I                      |
| 10   | 2      | 8      | +       | 11    | 2       | 9       | +        | 1102.9451                  | 45.1                  | -1                         | I                      |
| 30   | 20     | 10     | +       | 30    | 20      | 11      | +        | 1102.9492                  | 32.3                  | -5                         | II                     |
| 10   | 4      | 6      | +       | 11    | 4       | 7       | +        | 1102.9600                  | 55.0                  | 1                          | I                      |
| 10   | 4      | 6      | -       | 11    | 4       | 7       | -        | 1102.9634                  | 57.7                  | 0                          | I                      |
| 11   | 1      | 11     | -       | 12    | 1       | 12      | -        | 1102.9797                  | 25.6                  | 1                          | I                      |
| 11   | 1      | 11     | +       | 12    | 1       | 12      | +        | 1102.9797                  | 25.6                  | -1                         | I                      |
| 10   | 1      | 9      | -       | 11    | 1       | 10      | -        | 1102.9966                  | 48.3                  | 2                          | I                      |
| 22   | 21     | 1      | +       | 22    | 21      | 2       | +        | 1102.9966                  | 48.3                  | 20                         | I                      |
| 10   | 1      | 9      | +       | 11    | 1       | 10      | +        | 1102.9988                  | 46.0                  | -1                         | I                      |
| 22   | 21     | 1      | -       | 22    | 21      | 2       | -        | 1103.0115                  | 21.4                  | 0                          | II                     |
| 35   | 19     | 17     | -       | 35    | 19      | 16      | -        | 1103.0115                  | 21.4                  | -1                         | II                     |
| 10   | 3      | 7      | -       | 11    | 3       | 8       | -        | 1103.0265                  | 31.9                  | 1                          | I                      |
| 10   | 3      | 7      | +       | 11    | 3       | 8       | +        | 1103.0265                  | 31.9                  | -1                         | I                      |
| 49   | 15     | 35     | +       | 49    | 15      | 34      | +        | 1103.0265                  | 31.9                  | -3                         | I                      |
| 57   | 11     | 47     | -       | 57    | 11      | 46      | -        | 1103.0332                  | 67.0                  | -11                        | II                     |
| 29   | 20     | 10     | +       | 29    | 20      | 9       | +        | 1103.0389                  | 40.5                  | 0                          | II                     |
| 39   | 18     | 22     | +       | 39    | 18      | 21      | +        | 1103.0588                  | 23.0                  | -1                         | II                     |
| 21   | 21     | 1      | +       | 21    | 21      | 0       | +        | 1103.0588                  | 23.0                  | 0                          | II                     |
| 39   | 18     | 22     | -       | 39    | 18      | 21      | -        | 1103.0682                  | 89.1                  | 2                          | II                     |
| 21   | 21     | 1      | -       | 21    | 21      | 0       | -        | 1103.0762                  | 25.5                  | -1                         | II                     |
| 55   | 12     | 44     | +       | 55    | 12      | 43      | +        | 1103.0996                  | 45.7                  | -2                         | II                     |
| 55   | 12     | 44     | -       | 55    | 12      | 43      | -        | 1103.1050                  | 22.5                  | 2                          | II                     |
| 34   | 19     | 15     | -       | 34    | 19      | 16      | -        | 1103.1170                  | 67.2                  | -3                         | II                     |
| 53   | 13     | 41     | +       | 53    | 13      | 40      | +        | 1103.1203                  | 93.1                  | -7                         | II                     |
| 28   | 20     | 8      | +       | 28    | 20      | 9       | +        | 1103.1252                  | 34.2                  | 1                          | II                     |
| 53   | 13     | 41     | -       | 53    | 13      | 40      | -        | 1103.1252                  | 34.2                  | -13                        | II                     |
| 9    | 7      | 3      | +       | 10    | 7       | 4       | +        | 1103.1343                  | 74.3                  | 0                          | I                      |
| 28   | 20     | 8      | -       | 28    | 20      | 9       | -        | 1103.1379                  | 46.1                  | -2                         | II                     |
| 9    | 7      | 3      | -       | 10    | 7       | 4       | -        | 1103.1562                  | 79.8                  | 1                          | I                      |
| 57   | 9      | 49     | -       | 57    | 9       | 48      | -        | 1103.1889                  | 90.5                  | -5                         | II                     |
| 48   | 15     | 33     | -       | 48    | 15      | 34      | -        | 1103.1889                  | 90.5                  | 4                          | II                     |
| 57   | 9      | 49     | +       | 57    | 9       | 48      | +        | 1103.1911                  | 93.0                  | 0                          | II                     |
| 33   | 19     | 15     | +       | 33    | 19      | 14      | +        | 1103.2089                  | 15.5                  | -2                         | II                     |
| 27   | 20     | 8      | +       | 27    | 20      | 7       | +        | 1103.2089                  | 15.5                  | 7                          | II                     |
| 27   | 20     | 8      | -       | 27    | 20      | 7       | -        | 1103.2215                  | 43.5                  | -1                         | II                     |
| 56   | 11     | 45     | +       | 56    | 11      | 46      | +        | 1103.2215                  | 43.5                  | 1                          | II                     |
| 50   | 14     | 36     | +       | 50    | 14      | 37      | +        | 1103.2594                  | 89.8                  | 3                          | II                     |
| 57   | 10     | 48     | +       | 57    | 10      | 47      | +        | 1103.2656                  | 81.9                  | -12                        | II                     |
| 50   | 14     | 36     | -       | 50    | 14      | 37      | -        | 1103.2656                  | 81.9                  | 5                          | II                     |
| 54   | 12     | 42     | +       | 54    | 12      | 43      | +        | 1103.2784                  | 88.7                  | 1                          | II                     |
| 26   | 20     | 6      | +       | 26    | 20      | 7       | +        | 1103.2881                  | 65.2                  | -2                         | I                      |
| 52   | 13     | 39     | -       | 52    | 13      | 40      | -        | 1103.2972                  | 46.1                  | 4                          | II                     |
| 26   | 20     | 6      | -       | 26    | 20      | 7       | -        | 1103.3023                  | 11.5                  | 2                          | II                     |
| 32   | 19     | 13     | +       | 32    | 19      | 14      | +        | 1103.3084                  | 58.7                  | -1                         | II                     |
| 32   | 19     | 13     | -       | 32    | 19      | 14      | -        | 1103.3196                  | 44.8                  | 1                          | II                     |
| 9    | 6      | 4      | +       | 10    | 6       | 5       | +        | 1103.3234                  | 71.0                  | 0                          | I                      |
| 47   | 15     | 33     | +       | 47    | 15      | 32      | +        | 1103.3339                  | 87.9                  | 5                          | II                     |
| 9    | 6      | 4      | -       | 10    | 6       | 5       | -        | 1103.3389                  | 73.6                  | 1                          | I                      |
| 44   | 16     | 28     | -       | 44    | 16      | 29      | -        | 1103.3518                  | 84.4                  | 2                          | II                     |
| 25   | 20     | 6      | +       | 25    | 20      | 5       | +        | 1103.3654                  | 91.1                  | -1                         | I                      |
| 25   | 20     | 6      | -       | 25    | 20      | 5       | -        | 1103.3801                  | 81.2                  | 5                          | I                      |
| 55   | 11     | 45     | +       | 55    | 11      | 44      | +        | 1103.4009                  | 83.8                  | 0                          | II                     |
| 55   | 11     | 45     | -       | 55    | 11      | 44      | -        | 1103.4048                  | 38.5                  | -8                         | II                     |
| 31   | 19     | 13     | +       | 31    | 19      | 12      | +        | 1103.4048                  | 38.5                  | -1                         | II                     |
| 31   | 19     | 13     | -       | 31    | 19      | 12      | -        | 1103.4160                  | 40.3                  | -1                         | II                     |
| 49   | 14     | 36     | -       | 49    | 14      | 35      | -        | 1103.4235                  | 38.3                  | -7                         | II                     |
| 24   | 20     | 4      | +       | 24    | 20      | 5       | +        | 1103.4395                  | 29.6                  | 0                          | II                     |
| 53   | 12     | 42     | +       | 53    | 12      | 41      | +        | 1103.4540                  | 34.6                  | 8                          | II                     |
| 24   | 20     | 4      | -       | 24    | 20      | 5       | -        | 1103.4540                  | 34.6                  | -1                         | II                     |
| 51   | 13     | 39     | +       | 51    | 13      | 38      | +        | 1103.4588                  | 37.1                  | 5                          | II                     |
| 53   | 12     | 42     | -       | 53    | 12      | 41      | -        | 1103.4588                  | 37.1                  | 6                          | II                     |
| 51   | 13     | 39     | -       | 51    | 13      | 38      | -        | 1103.4644                  | 29.0                  | 7                          | II                     |
| 9    | 5      | 5      | +       | 10    | 5       | 6       | +        | 1103.4819                  | 63.5                  | 0                          | I                      |
| 46   | 15     | 31     | +       | 46    | 15      | 32      | +        | 1103.4819                  | 63.5                  | 5                          | I                      |

| $N'$ | $K'_a$ | $K'_c$ | $J'^a)$ | $N''$ | $K''_a$ | $K''_c$ | $J''^b)$ | $\nu$ , exp. <sup>c)</sup> | Transm. <sup>d)</sup> | $\delta_\nu$ <sup>e)</sup> | Spectrum <sup>f)</sup> |
|------|--------|--------|---------|-------|---------|---------|----------|----------------------------|-----------------------|----------------------------|------------------------|
|      |        | 1      |         |       |         | 2       |          | 3                          | 4                     | 5                          | 6                      |
| 10   | 0      | 10     | —       | 11    | 0       | 11      | —        | 1103.4912                  | 19.2                  | 17                         | I                      |
| 10   | 0      | 10     | +       | 11    | 0       | 11      | +        | 1103.4912                  | 19.2                  | 1                          | I                      |
| 9    | 5      | 5      | —       | 10    | 5       | 6       | —        | 1103.4912                  | 19.2                  | -5                         | I                      |
| 30   | 19     | 11     | —       | 30    | 19      | 12      | —        | 1103.5103                  | 21.2                  | 7                          | II                     |
| 23   | 20     | 4      | +       | 23    | 20      | 3       | +        | 1103.5103                  | 21.2                  | -1                         | II                     |
| 56   | 10     | 46     | +       | 56    | 10      | 47      | +        | 1103.5200                  | 19.8                  | 1                          | II                     |
| 23   | 20     | 4      | —       | 23    | 20      | 3       | —        | 1103.5259                  | 16.1                  | 3                          | II                     |
| 8    | 8      | 0      | +       | 9     | 8       | 1       | +        | 1103.5523                  | 88.5                  | -4                         | I                      |
| 22   | 20     | 2      | +       | 22    | 20      | 3       | +        | 1103.5787                  | 24.0                  | 1                          | II                     |
| 54   | 11     | 43     | —       | 54    | 11      | 44      | —        | 1103.5883                  | 16.6                  | 6                          | II                     |
| 29   | 19     | 11     | +       | 29    | 19      | 10      | +        | 1103.5883                  | 16.6                  | 0                          | II                     |
| 8    | 8      | 0      | —       | 9     | 8       | 1       | —        | 1103.5883                  | 16.6                  | 1                          | II                     |
| 22   | 20     | 2      | —       | 22    | 20      | 3       | —        | 1103.5941                  | 26.8                  | -1                         | II                     |
| 29   | 19     | 11     | —       | 29    | 19      | 10      | —        | 1103.5999                  | 47.9                  | -1                         | II                     |
| 9    | 4      | 6      | +       | 10    | 4       | 7       | +        | 1103.6084                  | 57.4                  | 1                          | I                      |
| 9    | 4      | 6      | —       | 10    | 4       | 7       | —        | 1103.6134                  | 63.0                  | 1                          | I                      |
| 50   | 13     | 37     | +       | 50    | 13      | 38      | +        | 1103.6220                  | 55.0                  | 1                          | II                     |
| 45   | 15     | 31     | +       | 45    | 15      | 30      | +        | 1103.6268                  | 66.5                  | 6                          | II                     |
| 50   | 13     | 37     | —       | 50    | 13      | 38      | —        | 1103.6268                  | 66.5                  | -5                         | II                     |
| 52   | 12     | 40     | —       | 52    | 12      | 41      | —        | 1103.6307                  | 42.8                  | 9                          | II                     |
| 45   | 15     | 31     | —       | 45    | 15      | 30      | —        | 1103.6336                  | 52.4                  | 6                          | II                     |
| 21   | 20     | 2      | +       | 21    | 20      | 1       | +        | 1103.6437                  | 85.1                  | 1                          | I                      |
| 21   | 20     | 2      | —       | 21    | 20      | 1       | —        | 1103.6595                  | 85.6                  | -3                         | I                      |
| 28   | 19     | 9      | +       | 28    | 19      | 10      | +        | 1103.6750                  | 13.5                  | -4                         | II                     |
| 15   | 1      | 15     | —       | 15    | 1       | 14      | —        | 1103.6829                  | 86.4                  | -2                         | I                      |
| 28   | 19     | 9      | —       | 28    | 19      | 10      | —        | 1103.6873                  | 43.1                  | -1                         | II                     |
| 20   | 20     | 0      | +       | 20    | 20      | 1       | +        | 1103.7066                  | 40.2                  | -2                         | I                      |
| 9    | 3      | 7      | +       | 10    | 3       | 8       | +        | 1103.7066                  | 40.2                  | 4                          | I                      |
| 9    | 3      | 7      | —       | 10    | 3       | 8       | —        | 1103.7066                  | 40.2                  | -9                         | I                      |
| 20   | 20     | 0      | —       | 20    | 20      | 1       | —        | 1103.7223                  | 88.2                  | -1                         | I                      |
| 47   | 14     | 34     | —       | 47    | 14      | 33      | —        | 1103.7327                  | 86.0                  | 1                          | II                     |
| 41   | 16     | 26     | +       | 41    | 16      | 25      | +        | 1103.7460                  | 36.5                  | -5                         | II                     |
| 41   | 16     | 26     | —       | 41    | 16      | 25      | —        | 1103.7533                  | 58.1                  | -6                         | II                     |
| 27   | 19     | 9      | +       | 27    | 19      | 8       | +        | 1103.7595                  | 38.4                  | 0                          | II                     |
| 8    | 7      | 1      | +       | 9     | 7       | 2       | +        | 1103.7725                  | 75.7                  | -4                         | I                      |
| 27   | 19     | 9      | —       | 27    | 19      | 8       | —        | 1103.7725                  | 75.7                  | 7                          | I                      |
| 49   | 13     | 37     | —       | 49    | 13      | 36      | —        | 1103.7884                  | 68.8                  | 8                          | II                     |
| 8    | 7      | 1      | —       | 9     | 7       | 2       | —        | 1103.7997                  | 84.7                  | -1                         | I                      |
| 9    | 2      | 8      | +       | 10    | 2       | 9       | +        | 1103.8424                  | 32.4                  | -18                        | I                      |
| 9    | 2      | 8      | —       | 10    | 2       | 9       | —        | 1103.8424                  | 32.4                  | 3                          | I                      |
| 26   | 19     | 7      | —       | 26    | 19      | 8       | —        | 1103.8530                  | 93.2                  | -1                         | I                      |
| 40   | 16     | 24     | +       | 40    | 16      | 25      | +        | 1103.8739                  | 33.2                  | -2                         | II                     |
| 54   | 10     | 44     | —       | 54    | 10      | 45      | —        | 1103.8771                  | 28.8                  | 6                          | I                      |
| 46   | 14     | 32     | —       | 46    | 14      | 33      | —        | 1103.8816                  | 67.8                  | -1                         | II                     |
| 40   | 16     | 24     | —       | 40    | 16      | 25      | —        | 1103.8816                  | 67.8                  | 1                          | II                     |
| 43   | 15     | 29     | +       | 43    | 15      | 28      | +        | 1103.9064                  | 40.2                  | 2                          | II                     |
| 25   | 19     | 7      | +       | 25    | 19      | 6       | +        | 1103.9184                  | 26.5                  | 0                          | II                     |
| 52   | 11     | 41     | +       | 52    | 11      | 42      | +        | 1103.9316                  | 13.9                  | 2                          | II                     |
| 25   | 19     | 7      | —       | 25    | 19      | 6       | —        | 1103.9316                  | 13.9                  | 1                          | II                     |
| 48   | 13     | 35     | +       | 48    | 13      | 36      | +        | 1103.9392                  | 74.5                  | 1                          | II                     |
| 48   | 13     | 35     | —       | 48    | 13      | 36      | —        | 1103.9443                  | 45.1                  | -3                         | II                     |
| 50   | 12     | 38     | +       | 50    | 12      | 39      | +        | 1103.9575                  | 26.2                  | -1                         | II                     |
| 50   | 12     | 38     | —       | 50    | 12      | 39      | —        | 1103.9623                  | 61.8                  | 1                          | I                      |
| 8    | 6      | 2      | +       | 9     | 6       | 3       | +        | 1103.9623                  | 61.8                  | -8                         | I                      |
| 8    | 6      | 2      | —       | 9     | 6       | 3       | —        | 1103.9824                  | 77.5                  | 1                          | I                      |
| 24   | 19     | 5      | +       | 24    | 19      | 6       | +        | 1103.9934                  | 28.0                  | 1                          | II                     |
| 39   | 16     | 24     | +       | 39    | 16      | 23      | +        | 1103.9973                  | 27.5                  | -12                        | II                     |
| 39   | 16     | 24     | —       | 39    | 16      | 23      | —        | 1104.0067                  | 19.5                  | 6                          | II                     |
| 24   | 19     | 5      | —       | 24    | 19      | 6       | —        | 1104.0067                  | 19.5                  | -1                         | II                     |
| 30   | 18     | 12     | +       | 30    | 18      | 13      | +        | 1104.0180                  | 35.9                  | -5                         | II                     |
| 45   | 14     | 32     | +       | 45    | 14      | 31      | +        | 1104.0220                  | 76.5                  | 3                          | II                     |
| 30   | 18     | 12     | —       | 30    | 18      | 13      | —        | 1104.0285                  | 44.2                  | -5                         | II                     |
| 45   | 14     | 32     | —       | 45    | 14      | 31      | —        | 1104.0285                  | 44.2                  | 8                          | II                     |
| 53   | 10     | 44     | —       | 53    | 10      | 43      | —        | 1104.0285                  | 44.2                  | -10                        | II                     |
| 25   | 3      | 23     | —       | 25    | 3       | 22      | —        | 1104.0317                  | 56.2                  | -1                         | II                     |
| 42   | 15     | 27     | +       | 42    | 15      | 28      | +        | 1104.0416                  | 78.9                  | 3                          | II                     |
| 42   | 15     | 27     | —       | 42    | 15      | 28      | —        | 1104.0485                  | 64.6                  | 5                          | II                     |
| 23   | 19     | 5      | +       | 23    | 19      | 4       | +        | 1104.0652                  | 17.3                  | 0                          | II                     |
| 47   | 13     | 35     | +       | 47    | 13      | 34      | +        | 1104.0931                  | 33.1                  | 5                          | II                     |
| 51   | 11     | 41     | —       | 51    | 11      | 40      | —        | 1104.1040                  | 93.5                  | -4                         | II                     |
| 29   | 18     | 12     | +       | 29    | 18      | 11      | +        | 1104.1094                  | 41.6                  | -2                         | II                     |
| 38   | 16     | 22     | +       | 38    | 16      | 23      | +        | 1104.1199                  | 12.2                  | 2                          | II                     |



| $N'$ | $K'_a$ | $K'_c$ | $J'^a)$ | $N''$ | $K''_a$ | $K''_c$ | $J''^b)$ | $\nu$ , exp. <sup>c)</sup> | Transm. <sup>d)</sup> | $\delta_\nu$ <sup>e)</sup> | Spectrum <sup>f)</sup> |
|------|--------|--------|---------|-------|---------|---------|----------|----------------------------|-----------------------|----------------------------|------------------------|
|      |        | 1      |         |       |         | 2       |          | 3                          | 4                     | 5                          | 6                      |
| 34   | 17     | 17     | —       | 34    | 17      | 18      | —        | 1104.1200                  | 12.2                  | -7                         | II                     |
| 29   | 18     | 12     | —       | 29    | 18      | 11      | —        | 1104.1200                  | 12.2                  | -3                         | II                     |
| 8    | 5      | 3      | +       | 9     | 5       | 4       | +        | 1104.1230                  | 65.7                  | 0                          | I                      |
| 38   | 16     | 22     | —       | 38    | 16      | 23      | —        | 1104.1268                  | 45.1                  | -6                         | II                     |
| 22   | 19     | 3      | +       | 22    | 19      | 4       | +        | 1104.1353                  | 69.4                  | 14                         | I                      |
| 8    | 5      | 3      | —       | 9     | 5       | 4       | —        | 1104.1353                  | 69.4                  | -2                         | I                      |
| 22   | 19     | 3      | —       | 22    | 19      | 4       | —        | 1104.1482                  | 19.5                  | -1                         | II                     |
| 44   | 14     | 30     | —       | 44    | 14      | 31      | —        | 1104.1704                  | 69.9                  | 0                          | II                     |
| 9    | 1      | 9      | —       | 10    | 1       | 10      | —        | 1104.1772                  | 29.1                  | 2                          | I                      |
| 9    | 1      | 9      | +       | 10    | 1       | 10      | +        | 1104.1772                  | 29.1                  | -1                         | I                      |
| 28   | 18     | 10     | +       | 28    | 18      | 11      | +        | 1104.1976                  | 25.3                  | 0                          | II                     |
| 21   | 19     | 3      | +       | 21    | 19      | 2       | +        | 1104.1998                  | 87.4                  | 0                          | I                      |
| 28   | 18     | 10     | —       | 28    | 18      | 11      | —        | 1104.2083                  | 38.1                  | -3                         | II                     |
| 52   | 10     | 42     | +       | 52    | 10      | 43      | +        | 1104.2145                  | 18.0                  | -16                        | II                     |
| 33   | 17     | 17     | +       | 33    | 17      | 16      | +        | 1104.2145                  | 18.0                  | -17                        | II                     |
| 21   | 19     | 3      | —       | 21    | 19      | 2       | —        | 1104.2146                  | 87.8                  | 0                          | I                      |
| 33   | 17     | 17     | —       | 33    | 17      | 16      | —        | 1104.2257                  | 28.9                  | 4                          | II                     |
| 37   | 16     | 22     | +       | 37    | 16      | 21      | +        | 1104.2381                  | 96.5                  | 3                          | I                      |
| 46   | 13     | 33     | +       | 46    | 13      | 34      | +        | 1104.2430                  | 82.1                  | 1                          | II                     |
| 37   | 16     | 22     | —       | 37    | 16      | 21      | —        | 1104.2460                  | 92.2                  | 4                          | I                      |
| 8    | 4      | 4      | +       | 9     | 4       | 5       | +        | 1104.2512                  | 59.2                  | 2                          | I                      |
| 8    | 4      | 4      | —       | 9     | 4       | 5       | —        | 1104.2580                  | 59.2                  | 1                          | I                      |
| 20   | 19     | 1      | +       | 20    | 19      | 2       | +        | 1104.2626                  | 86.0                  | 0                          | I                      |
| 50   | 11     | 39     | +       | 50    | 11      | 40      | +        | 1104.2660                  | 82.5                  | -1                         | II                     |
| 50   | 11     | 39     | —       | 50    | 11      | 40      | —        | 1104.2709                  | 88.6                  | 1                          | II                     |
| 48   | 12     | 36     | +       | 48    | 12      | 37      | +        | 1104.2776                  | 81.3                  | 6                          | I                      |
| 20   | 19     | 1      | —       | 20    | 19      | 2       | —        | 1104.2776                  | 81.3                  | -3                         | I                      |
| 27   | 18     | 10     | +       | 27    | 18      | 9       | +        | 1104.2825                  | 71.2                  | 0                          | I                      |
| 48   | 12     | 36     | —       | 48    | 12      | 37      | —        | 1104.2825                  | 71.2                  | 5                          | I                      |
| 8    | 1      | 7      | —       | 9     | 1       | 8       | —        | 1104.2857                  | 53.3                  | 2                          | I                      |
| 8    | 1      | 7      | +       | 9     | 1       | 8       | +        | 1104.2884                  | 45.7                  | -2                         | I                      |
| 27   | 18     | 10     | —       | 27    | 18      | 9       | —        | 1104.2937                  | 85.6                  | 0                          | I                      |
| 8    | 2      | 6      | —       | 9     | 2       | 7       | —        | 1104.3045                  | 56.3                  | 1                          | I                      |
| 51   | 8      | 44     | +       | 51    | 8       | 43      | +        | 1104.3072                  | 53.3                  | 8                          | I                      |
| 8    | 2      | 6      | +       | 9     | 2       | 7       | +        | 1104.3072                  | 53.3                  | 0                          | I                      |
| 43   | 14     | 30     | —       | 43    | 14      | 29      | —        | 1104.3102                  | 14.4                  | 4                          | II                     |
| 32   | 17     | 15     | +       | 32    | 17      | 16      | +        | 1104.3177                  | 45.2                  | 1                          | II                     |
| 19   | 19     | 1      | +       | 19    | 19      | 0       | +        | 1104.3223                  | 84.7                  | 0                          | I                      |
| 32   | 17     | 15     | —       | 32    | 17      | 16      | —        | 1104.3271                  | 48.6                  | 3                          | II                     |
| 8    | 3      | 5      | +       | 9     | 3       | 6       | +        | 1104.3380                  | 46.9                  | 4                          | I                      |
| 19   | 19     | 1      | —       | 19    | 19      | 0       | —        | 1104.3380                  | 46.9                  | -2                         | I                      |
| 8    | 3      | 5      | —       | 9     | 3       | 6       | —        | 1104.3380                  | 46.9                  | -16                        | I                      |
| 36   | 16     | 20     | +       | 36    | 16      | 21      | +        | 1104.3527                  | 60.6                  | 1                          | II                     |
| 26   | 18     | 8      | +       | 26    | 18      | 9       | +        | 1104.3641                  | 91.4                  | -3                         | I                      |
| 26   | 18     | 8      | —       | 26    | 18      | 9       | —        | 1104.3758                  | 92.2                  | -1                         | I                      |
| 45   | 13     | 33     | +       | 45    | 13      | 32      | +        | 1104.3899                  | 79.9                  | 0                          | II                     |
| 7    | 7      | 1      | +       | 8     | 7       | 2       | +        | 1104.4078                  | 79.2                  | 6                          | I                      |
| 31   | 17     | 15     | +       | 31    | 17      | 14      | +        | 1104.4159                  | 27.9                  | 1                          | II                     |
| 39   | 15     | 25     | +       | 39    | 15      | 24      | +        | 1104.4270                  | 29.4                  | -2                         | II                     |
| 39   | 15     | 25     | —       | 39    | 15      | 24      | —        | 1104.4342                  | 37.7                  | 1                          | II                     |
| 7    | 7      | 1      | —       | 8     | 7       | 2       | —        | 1104.4390                  | 88.6                  | -20                        | I                      |
| 25   | 18     | 8      | +       | 25    | 18      | 7       | +        | 1104.4429                  | 20.7                  | -3                         | II                     |
| 25   | 18     | 8      | —       | 25    | 18      | 7       | —        | 1104.4549                  | 27.7                  | -1                         | II                     |
| 35   | 16     | 20     | +       | 35    | 16      | 19      | +        | 1104.4644                  | 61.8                  | 1                          | II                     |
| 35   | 16     | 20     | —       | 35    | 16      | 19      | —        | 1104.4723                  | 61.9                  | 0                          | II                     |
| 30   | 17     | 13     | +       | 30    | 17      | 14      | +        | 1104.5115                  | 21.2                  | 6                          | II                     |
| 24   | 18     | 6      | +       | 24    | 18      | 7       | +        | 1104.5190                  | 18.4                  | 2                          | II                     |
| 24   | 18     | 6      | —       | 24    | 18      | 7       | —        | 1104.5307                  | 17.9                  | -3                         | II                     |
| 44   | 13     | 31     | —       | 44    | 13      | 32      | —        | 1104.5397                  | 71.2                  | 7                          | I                      |
| 38   | 15     | 23     | +       | 38    | 15      | 24      | +        | 1104.5498                  | 52.7                  | 4                          | II                     |
| 50   | 10     | 40     | +       | 50    | 10      | 41      | +        | 1104.5498                  | 52.7                  | -1                         | II                     |
| 38   | 15     | 23     | —       | 38    | 15      | 24      | —        | 1104.5563                  | 62.7                  | 0                          | II                     |
| 41   | 14     | 28     | +       | 41    | 14      | 27      | +        | 1104.5729                  | 45.5                  | 3                          | II                     |
| 34   | 16     | 18     | +       | 34    | 16      | 19      | +        | 1104.5729                  | 45.5                  | 0                          | II                     |
| 41   | 14     | 28     | —       | 41    | 14      | 27      | —        | 1104.5787                  | 71.9                  | -1                         | II                     |
| 34   | 16     | 18     | —       | 34    | 16      | 19      | —        | 1104.5809                  | 57.3                  | 0                          | II                     |
| 48   | 11     | 37     | +       | 48    | 11      | 38      | +        | 1104.5875                  | 77.0                  | 0                          | II                     |
| 46   | 12     | 34     | —       | 46    | 12      | 35      | —        | 1104.5875                  | 77.0                  | -3                         | II                     |
| 23   | 18     | 6      | +       | 23    | 18      | 5       | +        | 1104.5915                  | 17.8                  | 0                          | II                     |
| 48   | 11     | 37     | —       | 48    | 11      | 38      | —        | 1104.5915                  | 17.8                  | -5                         | II                     |
| 7    | 6      | 2      | +       | 8     | 6       | 3       | +        | 1104.5986                  | 81.1                  | 0                          | I                      |
| 23   | 18     | 6      | —       | 23    | 18      | 5       | —        | 1104.6037                  | 85.8                  | -4                         | I                      |

| $N'$ | $K'_a$ | $K'_c$ | $J'^a)$ | $N''$ | $K''_a$ | $K''_c$ | $J''^b)$ | $\nu$ , exp. <sup>c)</sup> | Transm. <sup>d)</sup> | $\delta_\nu$ <sup>e)</sup> | Spectrum <sup>f)</sup> |
|------|--------|--------|---------|-------|---------|---------|----------|----------------------------|-----------------------|----------------------------|------------------------|
|      |        | 1      |         |       |         | 2       |          | 3                          | 4                     | 5                          | 6                      |
| 29   | 17     | 13     | —       | 29    | 17      | 12      | —        | 1104.6126                  | 40.5                  | 0                          | II                     |
| 7    | 6      | 2      | —       | 8     | 6       | 3       | —        | 1104.6227                  | 66.5                  | -4                         | I                      |
| 22   | 18     | 4      | +       | 22    | 18      | 5       | +        | 1104.6612                  | 85.3                  | 1                          | I                      |
| 8    | 0      | 8      | —       | 9     | 0       | 9       | —        | 1104.6654                  | 32.4                  | 1                          | I                      |
| 8    | 0      | 8      | +       | 9     | 0       | 9       | +        | 1104.6654                  | 32.4                  | -2                         | I                      |
| 43   | 13     | 31     | +       | 43    | 13      | 30      | +        | 1104.6739                  | 12.7                  | 1                          | II                     |
| 22   | 18     | 4      | —       | 22    | 18      | 5       | —        | 1104.6740                  | 86.2                  | 0                          | I                      |
| 43   | 13     | 31     | —       | 43    | 13      | 30      | —        | 1104.6784                  | 46.9                  | -9                         | II                     |
| 33   | 16     | 18     | +       | 33    | 16      | 17      | +        | 1104.6784                  | 46.9                  | 2                          | II                     |
| 33   | 16     | 18     | —       | 33    | 16      | 17      | —        | 1104.6863                  | 54.1                  | -1                         | II                     |
| 28   | 17     | 11     | +       | 28    | 17      | 12      | +        | 1104.6918                  | 35.9                  | 1                          | II                     |
| 28   | 17     | 11     | —       | 28    | 17      | 12      | —        | 1104.7018                  | 24.2                  | 1                          | II                     |
| 40   | 14     | 26     | +       | 40    | 14      | 27      | +        | 1104.7018                  | 24.2                  | -4                         | II                     |
| 40   | 14     | 26     | —       | 40    | 14      | 27      | —        | 1104.7092                  | 41.3                  | 8                          | II                     |
| 49   | 10     | 40     | —       | 49    | 10      | 39      | —        | 1104.7122                  | 54.7                  | 2                          | II                     |
| 21   | 18     | 4      | +       | 21    | 18      | 3       | +        | 1104.7275                  | 85.5                  | 0                          | I                      |
| 45   | 12     | 34     | —       | 45    | 12      | 33      | —        | 1104.7359                  | 96.2                  | 1                          | I                      |
| 21   | 18     | 4      | —       | 21    | 18      | 3       | —        | 1104.7408                  | 87.6                  | -1                         | II                     |
| 47   | 11     | 37     | —       | 47    | 11      | 36      | —        | 1104.7473                  | 88.5                  | -1                         | II                     |
| 7    | 5      | 3      | +       | 8     | 5       | 4       | +        | 1104.7598                  | 75.5                  | 0                          | I                      |
| 27   | 17     | 11     | +       | 27    | 17      | 10      | +        | 1104.7763                  | 70.5                  | -12                        | I                      |
| 7    | 5      | 3      | —       | 8     | 5       | 4       | —        | 1104.7763                  | 70.5                  | 2                          | I                      |
| 32   | 16     | 16     | +       | 32    | 16      | 17      | +        | 1104.7804                  | 44.8                  | 0                          | II                     |
| 27   | 17     | 11     | —       | 27    | 17      | 10      | —        | 1104.7872                  | 13.2                  | -4                         | II                     |
| 32   | 16     | 16     | —       | 32    | 16      | 17      | —        | 1104.7872                  | 13.2                  | -13                        | II                     |
| 20   | 18     | 2      | +       | 20    | 18      | 3       | +        | 1104.7910                  | 82.6                  | 1                          | I                      |
| 36   | 15     | 21     | —       | 36    | 15      | 22      | —        | 1104.7910                  | 82.6                  | -3                         | I                      |
| 20   | 18     | 2      | —       | 20    | 18      | 3       | —        | 1104.8048                  | 85.9                  | 0                          | I                      |
| 42   | 13     | 29     | +       | 42    | 13      | 30      | +        | 1104.8115                  | 93.8                  | 7                          | I                      |
| 39   | 14     | 26     | —       | 39    | 14      | 25      | —        | 1104.8346                  | 67.7                  | -2                         | II                     |
| 19   | 18     | 2      | +       | 19    | 18      | 1       | +        | 1104.8512                  | 82.7                  | 0                          | I                      |
| 26   | 17     | 9      | +       | 26    | 17      | 10      | +        | 1104.8601                  | 90.9                  | 1                          | I                      |
| 19   | 18     | 2      | —       | 19    | 18      | 1       | —        | 1104.8656                  | 83.9                  | -1                         | II                     |
| 48   | 10     | 38     | +       | 48    | 10      | 39      | +        | 1104.8705                  | 23.6                  | -11                        | II                     |
| 26   | 17     | 9      | —       | 26    | 17      | 10      | —        | 1104.8705                  | 23.6                  | 0                          | II                     |
| 48   | 10     | 38     | —       | 48    | 10      | 39      | —        | 1104.8753                  | 74.9                  | -5                         | II                     |
| 31   | 16     | 16     | +       | 31    | 16      | 15      | +        | 1104.8797                  | 38.3                  | 2                          | II                     |
| 7    | 4      | 4      | +       | 8     | 4       | 5       | +        | 1104.8900                  | 68.0                  | 0                          | I                      |
| 7    | 4      | 4      | —       | 8     | 4       | 5       | —        | 1104.8993                  | 70.7                  | 0                          | I                      |
| 35   | 15     | 21     | —       | 35    | 15      | 20      | —        | 1104.9038                  | 50.6                  | -1                         | II                     |
| 18   | 18     | 0      | +       | 18    | 18      | 1       | +        | 1104.9085                  | 81.4                  | 0                          | I                      |
| 18   | 18     | 0      | —       | 18    | 18      | 1       | —        | 1104.9234                  | 82.1                  | -1                         | I                      |
| 25   | 17     | 9      | +       | 25    | 17      | 8       | +        | 1104.9396                  | 90.6                  | 1                          | I                      |
| 41   | 13     | 29     | —       | 41    | 13      | 28      | —        | 1104.9504                  | 88.5                  | 3                          | I                      |
| 25   | 17     | 9      | —       | 25    | 17      | 8       | —        | 1104.9504                  | 88.5                  | 1                          | I                      |
| 38   | 14     | 24     | —       | 38    | 14      | 25      | —        | 1104.9581                  | 96.6                  | 2                          | I                      |
| 30   | 16     | 14     | +       | 30    | 16      | 15      | +        | 1104.9754                  | 93.0                  | 0                          | I                      |
| 30   | 16     | 14     | —       | 30    | 16      | 15      | —        | 1104.9842                  | 72.1                  | 2                          | I                      |
| 7    | 3      | 5      | +       | 8     | 3       | 6       | +        | 1104.9894                  | 62.2                  | 0                          | I                      |
| 7    | 3      | 5      | —       | 8     | 3       | 6       | —        | 1104.9931                  | 65.5                  | 0                          | I                      |
| 34   | 15     | 19     | +       | 34    | 15      | 20      | +        | 1105.0061                  | 48.8                  | 0                          | II                     |
| 34   | 15     | 19     | —       | 34    | 15      | 20      | —        | 1105.0135                  | 51.5                  | 0                          | II                     |
| 24   | 17     | 7      | +       | 24    | 17      | 8       | +        | 1105.0165                  | 82.2                  | 5                          | I                      |
| 43   | 12     | 32     | +       | 43    | 12      | 31      | +        | 1105.0165                  | 82.2                  | -1                         | I                      |
| 24   | 17     | 7      | —       | 24    | 17      | 8       | —        | 1105.0270                  | 89.1                  | -1                         | II                     |
| 45   | 11     | 35     | +       | 45    | 11      | 34      | +        | 1105.0438                  | 59.9                  | -3                         | II                     |
| 45   | 11     | 35     | —       | 45    | 11      | 34      | —        | 1105.0492                  | 53.6                  | 7                          | II                     |
| 29   | 16     | 14     | +       | 29    | 16      | 13      | +        | 1105.0681                  | 92.5                  | 0                          | I                      |
| 29   | 16     | 14     | —       | 29    | 16      | 13      | —        | 1105.0770                  | 91.4                  | 1                          | I                      |
| 37   | 14     | 24     | —       | 37    | 14      | 23      | —        | 1105.0770                  | 91.4                  | -8                         | I                      |
| 23   | 17     | 7      | +       | 23    | 17      | 6       | +        | 1105.0894                  | 84.1                  | 1                          | I                      |
| 7    | 2      | 6      | —       | 8     | 2       | 7       | —        | 1105.0973                  | 39.3                  | -2                         | I                      |
| 7    | 2      | 6      | +       | 8     | 2       | 7       | +        | 1105.0973                  | 39.3                  | 3                          | I                      |
| 33   | 15     | 19     | +       | 33    | 15      | 18      | +        | 1105.1124                  | 50.2                  | 0                          | II                     |
| 48   | 9      | 39     | +       | 48    | 9       | 40      | +        | 1105.1464                  | 90.7                  | 1                          | II                     |
| 48   | 9      | 39     | —       | 48    | 9       | 40      | —        | 1105.1503                  | 90.7                  | -3                         | II                     |
| 22   | 17     | 5      | +       | 22    | 17      | 6       | +        | 1105.1593                  | 84.2                  | -2                         | I                      |
| 42   | 12     | 30     | —       | 42    | 12      | 31      | —        | 1105.1593                  | 84.2                  | -2                         | I                      |
| 28   | 16     | 12     | —       | 28    | 16      | 13      | —        | 1105.1668                  | 91.3                  | 1                          | I                      |
| 22   | 17     | 5      | —       | 22    | 17      | 6       | —        | 1105.1712                  | 87.2                  | 0                          | I                      |
| 46   | 10     | 36     | +       | 46    | 10      | 37      | +        | 1105.1806                  | 79.0                  | 1                          | II                     |
| 36   | 14     | 22     | +       | 36    | 14      | 23      | +        | 1105.1882                  | 96.0                  | 1                          | I                      |

| $N'$ | $K'_a$ | $K'_c$ | $J'^a)$ | $N''$ | $K''_a$ | $K''_c$ | $J''^b)$ | $\nu$ , exp. <sup>c)</sup> | Transm. <sup>d)</sup> | $\delta_\nu$ <sup>e)</sup> | Spectrum <sup>f)</sup> |
|------|--------|--------|---------|-------|---------|---------|----------|----------------------------|-----------------------|----------------------------|------------------------|
|      |        | 1      |         |       |         | 2       |          | 3                          | 4                     | 5                          | 6                      |
| 44   | 11     | 33     | —       | 44    | 11      | 34      | —        | 1105.1940                  | 94.3                  | -1                         | I                      |
| 35   | 5      | 31     | —       | 35    | 5       | 30      | —        | 1105.1940                  | 94.3                  | 5                          | I                      |
| 39   | 13     | 27     | +       | 39    | 13      | 26      | +        | 1105.2025                  | 96.7                  | 3                          | I                      |
| 39   | 13     | 27     | —       | 39    | 13      | 26      | —        | 1105.2077                  | 97.2                  | -2                         | I                      |
| 32   | 15     | 17     | +       | 32    | 15      | 18      | +        | 1105.2154                  | 87.2                  | 1                          | I                      |
| 32   | 15     | 17     | —       | 32    | 15      | 18      | —        | 1105.2220                  | 84.5                  | -9                         | I                      |
| 35   | 5      | 31     | +       | 35    | 5       | 30      | +        | 1105.2220                  | 84.5                  | 6                          | I                      |
| 21   | 17     | 5      | +       | 21    | 17      | 4       | +        | 1105.2267                  | 84.0                  | 1                          | I                      |
| 6    | 6      | 0      | +       | 7     | 6       | 1       | +        | 1105.2298                  | 88.8                  | 1                          | I                      |
| 21   | 17     | 5      | —       | 21    | 17      | 4       | —        | 1105.2387                  | 86.0                  | 0                          | I                      |
| 27   | 16     | 12     | +       | 27    | 16      | 11      | +        | 1105.2442                  | 91.2                  | 1                          | I                      |
| 27   | 16     | 12     | —       | 27    | 16      | 11      | —        | 1105.2533                  | 91.8                  | -1                         | I                      |
| 6    | 6      | 0      | —       | 7     | 6       | 1       | —        | 1105.2617                  | 91.1                  | 2                          | I                      |
| 47   | 9      | 39     | +       | 47    | 9       | 38      | +        | 1105.2678                  | 79.5                  | 8                          | I                      |
| 47   | 9      | 39     | —       | 47    | 9       | 38      | —        | 1105.2715                  | 78.2                  | 11                         | I                      |
| 20   | 17     | 3      | +       | 20    | 17      | 4       | +        | 1105.2905                  | 83.5                  | -1                         | I                      |
| 20   | 17     | 3      | —       | 20    | 17      | 4       | —        | 1105.3031                  | 84.2                  | -1                         | I                      |
| 35   | 14     | 22     | —       | 35    | 14      | 21      | —        | 1105.3082                  | 94.2                  | 2                          | I                      |
| 31   | 15     | 17     | +       | 31    | 15      | 16      | +        | 1105.3152                  | 41.8                  | 0                          | II                     |
| 31   | 15     | 17     | —       | 31    | 15      | 16      | —        | 1105.3228                  | 43.3                  | -1                         | II                     |
| 26   | 16     | 10     | +       | 26    | 16      | 11      | +        | 1105.3273                  | 89.7                  | -2                         | I                      |
| 43   | 11     | 33     | +       | 43    | 11      | 32      | +        | 1105.3319                  | 95.4                  | 2                          | I                      |
| 38   | 13     | 25     | —       | 38    | 13      | 26      | —        | 1105.3319                  | 95.4                  | 1                          | I                      |
| 26   | 16     | 10     | —       | 26    | 16      | 11      | —        | 1105.3369                  | 88.8                  | -1                         | I                      |
| 47   | 8      | 40     | +       | 47    | 8       | 39      | +        | 1105.3369                  | 88.8                  | 4                          | I                      |
| 47   | 8      | 40     | —       | 47    | 8       | 39      | —        | 1105.3369                  | 88.8                  | 3                          | I                      |
| 43   | 11     | 33     | —       | 43    | 11      | 32      | —        | 1105.3369                  | 88.8                  | 7                          | I                      |
| 19   | 17     | 3      | +       | 19    | 17      | 2       | +        | 1105.3517                  | 76.1                  | 2                          | I                      |
| 19   | 17     | 3      | —       | 19    | 17      | 2       | —        | 1105.3645                  | 81.4                  | -1                         | I                      |
| 7    | 1      | 7      | —       | 8     | 1       | 8       | —        | 1105.3706                  | 35.2                  | 1                          | I                      |
| 7    | 1      | 7      | +       | 8     | 1       | 8       | +        | 1105.3706                  | 35.2                  | -1                         | I                      |
| 6    | 5      | 1      | +       | 7     | 5       | 2       | +        | 1105.3923                  | 80.8                  | 0                          | I                      |
| 18   | 17     | 1      | +       | 18    | 17      | 2       | +        | 1105.4087                  | 49.5                  | -6                         | I                      |
| 6    | 5      | 1      | —       | 7     | 5       | 2       | —        | 1105.4140                  | 77.8                  | 1                          | I                      |
| 25   | 16     | 10     | —       | 25    | 16      | 9       | —        | 1105.4177                  | 84.6                  | 2                          | I                      |
| 34   | 14     | 20     | —       | 34    | 14      | 21      | —        | 1105.4177                  | 84.6                  | -5                         | I                      |
| 18   | 17     | 1      | —       | 18    | 17      | 2       | —        | 1105.4229                  | 80.3                  | -1                         | I                      |
| 50   | 8      | 42     | +       | 50    | 8       | 43      | +        | 1105.4381                  | 96.4                  | 1                          | I                      |
| 46   | 9      | 37     | +       | 46    | 9       | 38      | +        | 1105.4463                  | 94.7                  | -7                         | I                      |
| 46   | 9      | 37     | —       | 46    | 9       | 38      | —        | 1105.4521                  | 90.9                  | 11                         | I                      |
| 37   | 13     | 25     | —       | 37    | 13      | 24      | —        | 1105.4521                  | 90.9                  | -4                         | I                      |
| 17   | 17     | 1      | +       | 17    | 17      | 0       | +        | 1105.4640                  | 76.6                  | 0                          | I                      |
| 44   | 10     | 34     | +       | 44    | 10      | 35      | +        | 1105.4782                  | 78.1                  | 19                         | II                     |
| 17   | 17     | 1      | —       | 17    | 17      | 0       | —        | 1105.4782                  | 78.1                  | 0                          | II                     |
| 24   | 16     | 8      | +       | 24    | 16      | 9       | +        | 1105.4848                  | 88.3                  | 0                          | I                      |
| 24   | 16     | 8      | —       | 24    | 16      | 9       | —        | 1105.4947                  | 89.0                  | -1                         | I                      |
| 29   | 15     | 15     | +       | 29    | 15      | 14      | +        | 1105.5048                  | 73.6                  | -5                         | I                      |
| 54   | 8      | 46     | —       | 54    | 8       | 47      | —        | 1105.5129                  | 19.9                  | -7                         | II                     |
| 33   | 14     | 20     | +       | 33    | 14      | 19      | +        | 1105.5187                  | 40.8                  | 1                          | II                     |
| 33   | 14     | 20     | —       | 33    | 14      | 19      | —        | 1105.5243                  | 70.7                  | -10                        | I                      |
| 6    | 4      | 2      | +       | 7     | 4       | 3       | +        | 1105.5243                  | 70.7                  | 1                          | I                      |
| 6    | 4      | 2      | —       | 7     | 4       | 3       | —        | 1105.5371                  | 75.6                  | 1                          | I                      |
| 39   | 12     | 28     | +       | 39    | 12      | 27      | +        | 1105.5483                  | 97.3                  | -1                         | I                      |
| 36   | 13     | 23     | +       | 36    | 13      | 24      | +        | 1105.5644                  | 95.7                  | 2                          | I                      |
| 36   | 13     | 23     | —       | 36    | 13      | 24      | —        | 1105.5691                  | 85.7                  | -9                         | I                      |
| 23   | 16     | 8      | —       | 23    | 16      | 7       | —        | 1105.5691                  | 85.7                  | 1                          | I                      |
| 6    | 1      | 5      | —       | 7     | 1       | 6       | —        | 1105.5820                  | 59.1                  | 2                          | I                      |
| 6    | 1      | 5      | +       | 7     | 1       | 6       | +        | 1105.5850                  | 57.2                  | 0                          | I                      |
| 28   | 15     | 13     | +       | 28    | 15      | 14      | +        | 1105.5956                  | 91.7                  | -1                         | I                      |
| 28   | 15     | 13     | —       | 28    | 15      | 14      | —        | 1105.6037                  | 91.4                  | 0                          | I                      |
| 41   | 11     | 31     | —       | 41    | 11      | 30      | —        | 1105.6114                  | 94.4                  | 10                         | I                      |
| 32   | 14     | 18     | +       | 32    | 14      | 19      | +        | 1105.6220                  | 61.3                  | -3                         | I                      |
| 6    | 3      | 3      | +       | 7     | 3       | 4       | +        | 1105.6220                  | 61.3                  | 2                          | I                      |
| 43   | 10     | 34     | —       | 43    | 10      | 33      | —        | 1105.6220                  | 61.3                  | -9                         | I                      |
| 32   | 14     | 18     | —       | 32    | 14      | 19      | —        | 1105.6278                  | 65.9                  | -13                        | I                      |
| 6    | 3      | 3      | —       | 7     | 3       | 4       | —        | 1105.6278                  | 65.9                  | 3                          | I                      |
| 6    | 2      | 4      | —       | 7     | 2       | 5       | —        | 1105.6410                  | 40.7                  | 3                          | I                      |
| 6    | 2      | 4      | +       | 7     | 2       | 5       | +        | 1105.6410                  | 40.7                  | -4                         | I                      |
| 22   | 16     | 6      | —       | 22    | 16      | 7       | —        | 1105.6410                  | 40.7                  | 8                          | I                      |
| 38   | 12     | 26     | +       | 38    | 12      | 27      | +        | 1105.6731                  | 97.2                  | 0                          | I                      |
| 35   | 13     | 23     | +       | 35    | 13      | 22      | +        | 1105.6784                  | 93.0                  | 0                          | I                      |
| 38   | 12     | 26     | —       | 38    | 12      | 27      | —        | 1105.6784                  | 93.0                  | 2                          | I                      |

| $N'$ | $K'_a$ | $K'_c$ | $J'^a)$ | $N''$ | $K''_a$ | $K''_c$ | $J''^b)$ | $\nu$ , exp. <sup>c)</sup> | Transm. <sup>d)</sup> | $\delta_\nu$ <sup>e)</sup> | Spectrum <sup>f)</sup> |
|------|--------|--------|---------|-------|---------|---------|----------|----------------------------|-----------------------|----------------------------|------------------------|
|      |        | 1      |         |       |         | 2       |          | 3                          | 4                     | 5                          | 6                      |
| 27   | 15     | 13     | +       | 27    | 15      | 12      | +        | 1105.6829                  | 89.2                  | 2                          | I                      |
| 27   | 15     | 13     | —       | 27    | 15      | 12      | —        | 1105.6909                  | 68.0                  | -1                         | I                      |
| 21   | 16     | 6      | +       | 21    | 16      | 5       | +        | 1105.6972                  | 83.2                  | -1                         | I                      |
| 21   | 16     | 6      | —       | 21    | 16      | 5       | —        | 1105.7081                  | 85.2                  | -1                         | I                      |
| 31   | 14     | 18     | +       | 31    | 14      | 17      | +        | 1105.7227                  | 72.2                  | -2                         | I                      |
| 31   | 14     | 18     | —       | 31    | 14      | 17      | —        | 1105.7298                  | 93.6                  | 0                          | I                      |
| 40   | 11     | 29     | +       | 40    | 11      | 30      | +        | 1105.7388                  | 94.5                  | 8                          | I                      |
| 44   | 9      | 35     | +       | 44    | 9       | 36      | +        | 1105.7388                  | 94.5                  | -6                         | I                      |
| 20   | 16     | 4      | +       | 20    | 16      | 5       | +        | 1105.7618                  | 81.8                  | 0                          | I                      |
| 42   | 10     | 32     | —       | 42    | 10      | 33      | —        | 1105.7618                  | 81.8                  | -9                         | I                      |
| 26   | 15     | 11     | +       | 26    | 15      | 12      | +        | 1105.7666                  | 88.7                  | -1                         | I                      |
| 26   | 15     | 11     | —       | 26    | 15      | 12      | —        | 1105.7733                  | 81.9                  | -20                        | I                      |
| 20   | 16     | 4      | —       | 20    | 16      | 5       | —        | 1105.7733                  | 81.9                  | 1                          | I                      |
| 34   | 13     | 21     | +       | 34    | 13      | 22      | +        | 1105.7884                  | 82.7                  | -9                         | I                      |
| 37   | 12     | 26     | +       | 37    | 12      | 25      | +        | 1105.7948                  | 93.2                  | 3                          | I                      |
| 34   | 13     | 21     | —       | 34    | 13      | 22      | —        | 1105.7948                  | 93.2                  | -3                         | I                      |
| 56   | 8      | 48     | +       | 56    | 8       | 49      | +        | 1105.7997                  | 96.9                  | -2                         | I                      |
| 37   | 12     | 26     | —       | 37    | 12      | 25      | —        | 1105.7997                  | 96.9                  | 1                          | I                      |
| 19   | 16     | 4      | +       | 19    | 16      | 3       | +        | 1105.8232                  | 79.5                  | 0                          | I                      |
| 30   | 14     | 16     | —       | 30    | 14      | 17      | —        | 1105.8272                  | 91.0                  | -1                         | I                      |
| 19   | 16     | 4      | —       | 19    | 16      | 3       | —        | 1105.8350                  | 81.6                  | 0                          | I                      |
| 6    | 0      | 6      | +       | 7     | 0       | 7       | +        | 1105.8511                  | 44.6                  | -6                         | I                      |
| 6    | 0      | 6      | —       | 7     | 0       | 7       | —        | 1105.8511                  | 44.6                  | 7                          | I                      |
| 25   | 15     | 11     | —       | 25    | 15      | 10      | —        | 1105.8562                  | 87.8                  | -1                         | I                      |
| 39   | 11     | 29     | +       | 39    | 11      | 28      | +        | 1105.8664                  | 95.9                  | -3                         | I                      |
| 39   | 6      | 34     | —       | 39    | 6       | 33      | —        | 1105.8664                  | 95.9                  | 6                          | I                      |
| 39   | 11     | 29     | —       | 39    | 11      | 28      | —        | 1105.8716                  | 96.9                  | 3                          | I                      |
| 18   | 16     | 2      | +       | 18    | 16      | 3       | +        | 1105.8816                  | 79.2                  | 0                          | I                      |
| 18   | 16     | 2      | —       | 18    | 16      | 3       | —        | 1105.8939                  | 78.3                  | 0                          | I                      |
| 41   | 10     | 32     | +       | 41    | 10      | 31      | +        | 1105.8939                  | 78.3                  | -10                        | I                      |
| 33   | 13     | 21     | +       | 33    | 13      | 20      | +        | 1105.8970                  | 41.9                  | 0                          | II                     |
| 33   | 13     | 21     | —       | 33    | 13      | 20      | —        | 1105.9029                  | 45.3                  | 0                          | II                     |
| 29   | 14     | 16     | +       | 29    | 14      | 15      | +        | 1105.9147                  | 83.3                  | 2                          | I                      |
| 29   | 14     | 16     | —       | 29    | 14      | 15      | —        | 1105.9216                  | 91.5                  | 0                          | I                      |
| 24   | 15     | 9      | +       | 24    | 15      | 10      | +        | 1105.9252                  | 82.7                  | -1                         | I                      |
| 24   | 15     | 9      | —       | 24    | 15      | 10      | —        | 1105.9340                  | 83.5                  | -2                         | I                      |
| 17   | 16     | 2      | +       | 17    | 16      | 1       | +        | 1105.9368                  | 75.5                  | 0                          | I                      |
| 17   | 16     | 2      | —       | 17    | 16      | 1       | —        | 1105.9496                  | 77.7                  | 0                          | I                      |
| 16   | 16     | 0      | +       | 16    | 16      | 1       | +        | 1105.9889                  | 73.6                  | 0                          | I                      |
| 38   | 11     | 27     | —       | 38    | 11      | 28      | —        | 1105.9968                  | 67.0                  | 1                          | II                     |
| 32   | 13     | 19     | +       | 32    | 13      | 20      | +        | 1106.0020                  | 70.0                  | 6                          | I                      |
| 16   | 16     | 0      | —       | 16    | 16      | 1       | —        | 1106.0020                  | 70.0                  | -2                         | I                      |
| 28   | 14     | 14     | +       | 28    | 14      | 15      | +        | 1106.0056                  | 89.2                  | 2                          | I                      |
| 23   | 15     | 9      | —       | 23    | 15      | 8       | —        | 1106.0088                  | 84.4                  | -2                         | I                      |
| 28   | 14     | 14     | —       | 28    | 14      | 15      | —        | 1106.0127                  | 90.6                  | 0                          | I                      |
| 42   | 9      | 33     | +       | 42    | 9       | 34      | +        | 1106.0204                  | 87.8                  | -5                         | I                      |
| 5    | 5      | 1      | +       | 6     | 5       | 2       | +        | 1106.0204                  | 87.8                  | 3                          | I                      |
| 35   | 12     | 24     | +       | 35    | 12      | 23      | +        | 1106.0277                  | 94.0                  | 2                          | I                      |
| 40   | 10     | 30     | +       | 40    | 10      | 31      | +        | 1106.0277                  | 94.0                  | 0                          | I                      |
| 35   | 12     | 24     | —       | 35    | 12      | 23      | —        | 1106.0331                  | 92.6                  | 4                          | I                      |
| 5    | 5      | 1      | —       | 6     | 5       | 2       | —        | 1106.0500                  | 91.8                  | 2                          | I                      |
| 22   | 15     | 7      | +       | 22    | 15      | 8       | +        | 1106.0712                  | 85.0                  | 0                          | I                      |
| 22   | 15     | 7      | —       | 22    | 15      | 8       | —        | 1106.0807                  | 85.4                  | 0                          | I                      |
| 27   | 14     | 14     | +       | 27    | 14      | 13      | +        | 1106.0932                  | 90.6                  | 0                          | I                      |
| 27   | 14     | 14     | —       | 27    | 14      | 13      | —        | 1106.1007                  | 89.1                  | 1                          | I                      |
| 31   | 13     | 19     | +       | 31    | 13      | 18      | +        | 1106.1024                  | 31.0                  | -3                         | II                     |
| 31   | 13     | 19     | —       | 31    | 13      | 18      | —        | 1106.1087                  | 39.9                  | -1                         | II                     |
| 37   | 11     | 27     | +       | 37    | 11      | 26      | +        | 1106.1143                  | 96.1                  | -1                         | I                      |
| 37   | 11     | 27     | —       | 37    | 11      | 26      | —        | 1106.1191                  | 96.8                  | 2                          | I                      |
| 34   | 12     | 22     | +       | 34    | 12      | 23      | +        | 1106.1394                  | 79.1                  | 3                          | I                      |
| 21   | 15     | 7      | +       | 21    | 15      | 6       | +        | 1106.1394                  | 79.1                  | 0                          | I                      |
| 21   | 15     | 7      | —       | 21    | 15      | 6       | —        | 1106.1492                  | 83.0                  | -1                         | I                      |
| 5    | 4      | 2      | +       | 6     | 4       | 3       | +        | 1106.1539                  | 78.3                  | 0                          | I                      |
| 41   | 9      | 33     | +       | 41    | 9       | 32      | +        | 1106.1539                  | 78.3                  | -3                         | I                      |
| 39   | 10     | 30     | +       | 39    | 10      | 29      | +        | 1106.1574                  | 54.7                  | 2                          | II                     |
| 39   | 10     | 30     | —       | 39    | 10      | 29      | —        | 1106.1616                  | 60.0                  | 3                          | I                      |
| 5    | 4      | 2      | —       | 6     | 4       | 3       | —        | 1106.1721                  | 82.9                  | -1                         | I                      |
| 26   | 14     | 12     | +       | 26    | 14      | 13      | +        | 1106.1780                  | 86.8                  | 2                          | I                      |
| 26   | 14     | 12     | —       | 26    | 14      | 13      | —        | 1106.1853                  | 89.5                  | -1                         | I                      |
| 30   | 13     | 17     | +       | 30    | 13      | 18      | +        | 1106.2008                  | 92.0                  | 1                          | I                      |
| 20   | 15     | 5      | +       | 20    | 15      | 6       | +        | 1106.2046                  | 80.5                  | 1                          | I                      |
| 20   | 15     | 5      | —       | 20    | 15      | 6       | —        | 1106.2146                  | 81.4                  | 0                          | I                      |

| $N'$ | $K'_a$ | $K'_c$ | $J'^a)$ | $N''$ | $K''_a$ | $K''_c$ | $J''^b)$ | $\nu$ , exp. <sup>c)</sup> | Transm. <sup>d)</sup> | $\delta_\nu$ <sup>e)</sup> | Spectrum <sup>f)</sup> |
|------|--------|--------|---------|-------|---------|---------|----------|----------------------------|-----------------------|----------------------------|------------------------|
|      |        | 1      |         |       |         | 2       |          | 3                          | 4                     | 5                          | 6                      |
| 36   | 11     | 25     | +       | 36    | 11      | 26      | +        | 1106.2335                  | 97.1                  | 3                          | I                      |
| 36   | 11     | 25     | −       | 36    | 11      | 26      | −        | 1106.2378                  | 96.4                  | 1                          | I                      |
| 33   | 12     | 22     | +       | 33    | 12      | 21      | +        | 1106.2475                  | 41.2                  | 0                          | II                     |
| 33   | 12     | 22     | −       | 33    | 12      | 21      | −        | 1106.2528                  | 44.7                  | 0                          | II                     |
| 5    | 3      | 3      | +       | 6     | 3       | 4       | +        | 1106.2568                  | 70.9                  | 1                          | I                      |
| 19   | 15     | 5      | +       | 19    | 15      | 4       | +        | 1106.2663                  | 58.3                  | -2                         | I                      |
| 5    | 3      | 3      | −       | 6     | 3       | 4       | −        | 1106.2663                  | 58.3                  | 6                          | I                      |
| 19   | 15     | 5      | −       | 19    | 15      | 4       | −        | 1106.2768                  | 77.8                  | -1                         | I                      |
| 38   | 10     | 28     | +       | 38    | 10      | 29      | +        | 1106.2834                  | 96.1                  | 0                          | I                      |
| 42   | 8      | 34     | +       | 42    | 8       | 35      | +        | 1106.2834                  | 96.1                  | 2                          | I                      |
| 42   | 8      | 34     | −       | 42    | 8       | 35      | −        | 1106.2874                  | 94.3                  | 2                          | I                      |
| 38   | 10     | 28     | −       | 38    | 10      | 29      | −        | 1106.2874                  | 94.3                  | -1                         | I                      |
| 40   | 9      | 31     | +       | 40    | 9       | 32      | +        | 1106.2909                  | 95.4                  | 7                          | I                      |
| 29   | 13     | 17     | +       | 29    | 13      | 16      | +        | 1106.2954                  | 91.5                  | -1                         | I                      |
| 29   | 13     | 17     | −       | 29    | 13      | 16      | −        | 1106.3018                  | 92.4                  | 0                          | I                      |
| 18   | 15     | 3      | +       | 18    | 15      | 4       | +        | 1106.3253                  | 77.5                  | 0                          | I                      |
| 18   | 15     | 3      | −       | 18    | 15      | 4       | −        | 1106.3365                  | 72.9                  | 2                          | I                      |
| 24   | 14     | 10     | −       | 24    | 14      | 11      | −        | 1106.3463                  | 59.7                  | 9                          | I                      |
| 5    | 2      | 4      | +       | 6     | 2       | 5       | +        | 1106.3463                  | 59.7                  | -1                         | I                      |
| 35   | 11     | 25     | +       | 35    | 11      | 24      | +        | 1106.3491                  | 61.9                  | 4                          | I                      |
| 5    | 2      | 4      | −       | 6     | 2       | 5       | −        | 1106.3491                  | 61.9                  | 2                          | I                      |
| 32   | 12     | 20     | +       | 32    | 12      | 21      | +        | 1106.3522                  | 76.4                  | -4                         | I                      |
| 32   | 12     | 20     | −       | 32    | 12      | 21      | −        | 1106.3579                  | 94.2                  | -1                         | I                      |
| 58   | 8      | 50     | +       | 58    | 8       | 51      | +        | 1106.3649                  | 80.7                  | 0                          | II                     |
| 41   | 8      | 34     | +       | 41    | 8       | 33      | +        | 1106.3649                  | 80.7                  | -2                         | II                     |
| 17   | 15     | 3      | +       | 17    | 15      | 2       | +        | 1106.3810                  | 74.2                  | 0                          | I                      |
| 28   | 13     | 15     | +       | 28    | 13      | 16      | +        | 1106.3870                  | 86.2                  | 0                          | I                      |
| 17   | 15     | 3      | −       | 17    | 15      | 2       | −        | 1106.3925                  | 72.7                  | 1                          | I                      |
| 58   | 8      | 50     | −       | 58    | 8       | 51      | −        | 1106.4028                  | 43.7                  | -9                         | II                     |
| 37   | 10     | 28     | +       | 37    | 10      | 27      | +        | 1106.4062                  | 96.3                  | 0                          | I                      |
| 23   | 14     | 10     | +       | 23    | 14      | 9       | +        | 1106.4125                  | 83.2                  | 0                          | I                      |
| 23   | 14     | 10     | −       | 23    | 14      | 9       | −        | 1106.4207                  | 84.2                  | 0                          | I                      |
| 16   | 15     | 1      | +       | 16    | 15      | 2       | +        | 1106.4334                  | 71.8                  | 0                          | I                      |
| 34   | 11     | 23     | +       | 34    | 11      | 24      | +        | 1106.4615                  | 75.2                  | 6                          | I                      |
| 27   | 13     | 15     | +       | 27    | 13      | 14      | +        | 1106.4750                  | 80.9                  | -4                         | I                      |
| 27   | 13     | 15     | −       | 27    | 13      | 14      | −        | 1106.4827                  | 58.1                  | 8                          | I                      |
| 15   | 15     | 1      | +       | 15    | 15      | 0       | +        | 1106.4827                  | 58.1                  | -1                         | I                      |
| 15   | 15     | 1      | −       | 15    | 15      | 0       | −        | 1106.4952                  | 69.8                  | -1                         | I                      |
| 36   | 10     | 26     | +       | 36    | 10      | 27      | +        | 1106.5260                  | 96.1                  | 3                          | I                      |
| 40   | 8      | 32     | +       | 40    | 8       | 33      | +        | 1106.5395                  | 74.2                  | 12                         | I                      |
| 40   | 8      | 32     | −       | 40    | 8       | 33      | −        | 1106.5418                  | 75.2                  | -1                         | I                      |
| 21   | 14     | 8      | +       | 21    | 14      | 7       | +        | 1106.5531                  | 76.1                  | 0                          | I                      |
| 30   | 12     | 18     | +       | 30    | 12      | 19      | +        | 1106.5531                  | 76.1                  | 1                          | I                      |
| 26   | 13     | 13     | +       | 26    | 13      | 14      | +        | 1106.5603                  | 39.1                  | -2                         | I                      |
| 5    | 1      | 5      | −       | 6     | 1       | 6       | −        | 1106.5603                  | 39.1                  | 1                          | I                      |
| 21   | 14     | 8      | −       | 21    | 14      | 7       | −        | 1106.5603                  | 39.1                  | -15                        | I                      |
| 5    | 1      | 5      | +       | 6     | 1       | 6       | +        | 1106.5603                  | 39.1                  | 2                          | I                      |
| 26   | 13     | 13     | −       | 26    | 13      | 14      | −        | 1106.5673                  | 87.7                  | 0                          | I                      |
| 33   | 11     | 23     | +       | 33    | 11      | 22      | +        | 1106.5698                  | 36.0                  | -2                         | II                     |
| 33   | 11     | 23     | −       | 33    | 11      | 22      | −        | 1106.5748                  | 27.7                  | 2                          | II                     |
| 27   | 4      | 24     | −       | 27    | 4       | 23      | −        | 1106.6072                  | 94.5                  | 1                          | I                      |
| 20   | 14     | 6      | +       | 20    | 14      | 7       | +        | 1106.6188                  | 79.7                  | 0                          | I                      |
| 20   | 14     | 6      | −       | 20    | 14      | 7       | −        | 1106.6277                  | 81.7                  | 0                          | I                      |
| 39   | 8      | 32     | +       | 39    | 8       | 31      | +        | 1106.6424                  | 83.8                  | -4                         | I                      |
| 35   | 10     | 26     | +       | 35    | 10      | 25      | +        | 1106.6424                  | 83.8                  | 6                          | I                      |
| 25   | 13     | 13     | −       | 25    | 13      | 12      | −        | 1106.6490                  | 83.4                  | -4                         | I                      |
| 29   | 12     | 18     | +       | 29    | 12      | 17      | +        | 1106.6490                  | 83.4                  | 7                          | I                      |
| 29   | 12     | 18     | −       | 29    | 12      | 17      | −        | 1106.6539                  | 91.7                  | -1                         | I                      |
| 37   | 9      | 29     | +       | 37    | 9       | 28      | +        | 1106.6698                  | 96.8                  | 1                          | I                      |
| 32   | 11     | 21     | +       | 32    | 11      | 22      | +        | 1106.6756                  | 93.9                  | -1                         | I                      |
| 32   | 11     | 21     | −       | 32    | 11      | 22      | −        | 1106.6810                  | 75.5                  | 6                          | I                      |
| 19   | 14     | 6      | +       | 19    | 14      | 5       | +        | 1106.6810                  | 75.5                  | -1                         | I                      |
| 19   | 14     | 6      | −       | 19    | 14      | 5       | −        | 1106.6906                  | 77.5                  | 1                          | I                      |
| 24   | 13     | 11     | +       | 24    | 13      | 12      | +        | 1106.7213                  | 84.4                  | 1                          | I                      |
| 39   | 7      | 33     | −       | 39    | 7       | 32      | −        | 1106.7213                  | 84.4                  | -3                         | I                      |
| 39   | 7      | 33     | +       | 39    | 7       | 32      | +        | 1106.7213                  | 84.4                  | 0                          | I                      |
| 24   | 13     | 11     | −       | 24    | 13      | 12      | −        | 1106.7283                  | 86.7                  | -1                         | I                      |
| 18   | 14     | 4      | +       | 18    | 14      | 5       | +        | 1106.7404                  | 68.8                  | 0                          | I                      |
| 28   | 12     | 16     | +       | 28    | 12      | 17      | +        | 1106.7404                  | 68.8                  | -1                         | I                      |
| 28   | 12     | 16     | −       | 28    | 12      | 17      | −        | 1106.7461                  | 90.1                  | -1                         | I                      |
| 18   | 14     | 4      | −       | 18    | 14      | 5       | −        | 1106.7501                  | 77.0                  | 0                          | I                      |
| 34   | 10     | 24     | +       | 34    | 10      | 25      | +        | 1106.7547                  | 52.3                  | -1                         | II                     |

| $N'$ | $K'_a$ | $K'_c$ | $J'^a)$ | $N''$ | $K''_a$ | $K''_c$ | $J''^b)$ | $\nu$ , exp. <sup>c)</sup> | Transm. <sup>d)</sup> | $\delta_\nu$ <sup>e)</sup> | Spectrum <sup>f)</sup> |
|------|--------|--------|---------|-------|---------|---------|----------|----------------------------|-----------------------|----------------------------|------------------------|
|      |        | 1      |         |       |         | 2       |          | 3                          | 4                     | 5                          | 6                      |
| 34   | 10     | 24     | —       | 34    | 10      | 25      | —        | 1106.7588                  | 53.2                  | 0                          | II                     |
| 31   | 11     | 21     | +       | 31    | 11      | 20      | +        | 1106.7784                  | 82.5                  | 4                          | I                      |
| 4    | 4      | 0      | +       | 5     | 4       | 1       | +        | 1106.7784                  | 82.5                  | -3                         | I                      |
| 31   | 11     | 21     | —       | 31    | 11      | 20      | —        | 1106.7828                  | 92.4                  | 0                          | I                      |
| 23   | 13     | 11     | +       | 23    | 13      | 10      | +        | 1106.7966                  | 47.3                  | -3                         | I                      |
| 17   | 14     | 4      | +       | 17    | 14      | 3       | +        | 1106.7966                  | 47.3                  | 2                          | I                      |
| 17   | 14     | 4      | —       | 17    | 14      | 3       | —        | 1106.8064                  | 68.8                  | -2                         | I                      |
| 23   | 13     | 11     | —       | 23    | 13      | 10      | —        | 1106.8064                  | 68.8                  | 23                         | I                      |
| 4    | 4      | 0      | —       | 5     | 4       | 1       | —        | 1106.8064                  | 68.8                  | 8                          | I                      |
| 42   | 7      | 35     | —       | 42    | 7       | 36      | —        | 1106.8122                  | 96.3                  | -2                         | I                      |
| 21   | 3      | 19     | —       | 21    | 3       | 18      | —        | 1106.8122                  | 96.3                  | -1                         | I                      |
| 21   | 3      | 19     | +       | 21    | 3       | 18      | +        | 1106.8403                  | 95.3                  | -11                        | I                      |
| 16   | 14     | 2      | +       | 16    | 14      | 3       | +        | 1106.8493                  | 71.2                  | 0                          | I                      |
| 16   | 14     | 2      | —       | 16    | 14      | 3       | —        | 1106.8599                  | 71.7                  | 0                          | I                      |
| 33   | 10     | 24     | +       | 33    | 10      | 23      | +        | 1106.8642                  | 91.9                  | 0                          | I                      |
| 22   | 13     | 9      | +       | 22    | 13      | 10      | +        | 1106.8691                  | 79.8                  | -1                         | I                      |
| 33   | 10     | 24     | —       | 33    | 10      | 23      | —        | 1106.8691                  | 79.8                  | 7                          | I                      |
| 4    | 1      | 3      | —       | 5     | 1       | 4       | —        | 1106.8787                  | 67.4                  | -1                         | I                      |
| 4    | 3      | 1      | +       | 5     | 3       | 2       | +        | 1106.8819                  | 56.6                  | -12                        | I                      |
| 4    | 1      | 3      | +       | 5     | 1       | 4       | +        | 1106.8819                  | 56.6                  | 3                          | I                      |
| 30   | 11     | 19     | —       | 30    | 11      | 20      | —        | 1106.8819                  | 56.6                  | -1                         | I                      |
| 15   | 14     | 2      | +       | 15    | 14      | 1       | +        | 1106.8989                  | 63.9                  | -2                         | I                      |
| 35   | 9      | 27     | —       | 35    | 9       | 26      | —        | 1106.9106                  | 56.0                  | 2                          | I                      |
| 15   | 14     | 2      | —       | 15    | 14      | 1       | —        | 1106.9106                  | 56.0                  | 4                          | I                      |
| 26   | 12     | 14     | —       | 26    | 12      | 15      | —        | 1106.9209                  | 88.0                  | -1                         | I                      |
| 21   | 13     | 9      | +       | 21    | 13      | 8       | +        | 1106.9386                  | 56.8                  | 1                          | I                      |
| 4    | 2      | 2      | +       | 5     | 2       | 3       | +        | 1106.9386                  | 56.8                  | 1                          | I                      |
| 4    | 2      | 2      | —       | 5     | 2       | 3       | —        | 1106.9423                  | 73.9                  | 1                          | I                      |
| 21   | 13     | 9      | —       | 21    | 13      | 8       | —        | 1106.9458                  | 53.6                  | -3                         | I                      |
| 14   | 14     | 0      | +       | 14    | 14      | 1       | +        | 1106.9458                  | 53.6                  | 1                          | I                      |
| 14   | 14     | 0      | —       | 14    | 14      | 1       | —        | 1106.9573                  | 66.9                  | 0                          | I                      |
| 32   | 10     | 22     | +       | 32    | 10      | 23      | +        | 1106.9709                  | 31.4                  | 4                          | II                     |
| 29   | 11     | 19     | +       | 29    | 11      | 18      | +        | 1106.9733                  | 88.0                  | 1                          | I                      |
| 29   | 11     | 19     | —       | 29    | 11      | 18      | —        | 1106.9781                  | 91.2                  | 1                          | I                      |
| 25   | 12     | 14     | +       | 25    | 12      | 13      | +        | 1106.9976                  | 87.4                  | 1                          | I                      |
| 25   | 12     | 14     | —       | 25    | 12      | 13      | —        | 1107.0042                  | 73.1                  | 6                          | I                      |
| 20   | 13     | 7      | +       | 20    | 13      | 8       | +        | 1107.0042                  | 73.1                  | -3                         | I                      |
| 20   | 13     | 7      | —       | 20    | 13      | 8       | —        | 1107.0124                  | 80.2                  | 0                          | I                      |
| 34   | 9      | 25     | +       | 34    | 9       | 26      | +        | 1107.0203                  | 57.7                  | -1                         | I                      |
| 34   | 9      | 25     | —       | 34    | 9       | 26      | —        | 1107.0239                  | 53.2                  | -1                         | II                     |
| 36   | 8      | 28     | +       | 36    | 8       | 29      | +        | 1107.0286                  | 87.0                  | -6                         | I                      |
| 36   | 8      | 28     | —       | 36    | 8       | 29      | —        | 1107.0316                  | 86.0                  | -8                         | II                     |
| 37   | 7      | 31     | —       | 37    | 7       | 30      | —        | 1107.0434                  | 90.0                  | -6                         | I                      |
| 37   | 7      | 31     | +       | 37    | 7       | 30      | +        | 1107.0434                  | 90.0                  | 9                          | I                      |
| 4    | 0      | 4      | +       | 5     | 0       | 5       | +        | 1107.0556                  | 63.8                  | -2                         | I                      |
| 4    | 0      | 4      | —       | 5     | 0       | 5       | —        | 1107.0556                  | 63.8                  | 21                         | I                      |
| 19   | 13     | 7      | +       | 19    | 13      | 6       | +        | 1107.0671                  | 74.2                  | -1                         | I                      |
| 28   | 11     | 17     | —       | 28    | 11      | 18      | —        | 1107.0705                  | 87.1                  | -2                         | II                     |
| 24   | 12     | 12     | +       | 24    | 12      | 13      | +        | 1107.0759                  | 72.0                  | -9                         | I                      |
| 19   | 13     | 7      | —       | 19    | 13      | 6       | —        | 1107.0759                  | 72.0                  | 4                          | I                      |
| 24   | 12     | 12     | —       | 24    | 12      | 13      | —        | 1107.0830                  | 85.3                  | 1                          | I                      |
| 18   | 13     | 5      | +       | 18    | 13      | 6       | +        | 1107.1269                  | 74.7                  | 0                          | I                      |
| 33   | 9      | 25     | +       | 33    | 9       | 24      | +        | 1107.1305                  | 91.7                  | 1                          | I                      |
| 18   | 13     | 5      | —       | 18    | 13      | 6       | —        | 1107.1354                  | 74.3                  | -1                         | I                      |
| 35   | 8      | 28     | +       | 35    | 8       | 27      | +        | 1107.1411                  | 94.9                  | -4                         | I                      |
| 35   | 6      | 30     | +       | 35    | 6       | 29      | +        | 1107.1530                  | 82.5                  | -1                         | I                      |
| 23   | 12     | 12     | +       | 23    | 12      | 11      | +        | 1107.1530                  | 82.5                  | 1                          | I                      |
| 23   | 12     | 12     | —       | 23    | 12      | 11      | —        | 1107.1595                  | 80.7                  | 4                          | I                      |
| 27   | 11     | 17     | —       | 27    | 11      | 16      | —        | 1107.1595                  | 80.7                  | -7                         | I                      |
| 31   | 5      | 27     | —       | 31    | 5       | 26      | —        | 1107.1730                  | 92.0                  | 10                         | I                      |
| 30   | 10     | 20     | +       | 30    | 10      | 21      | +        | 1107.1730                  | 92.0                  | -2                         | I                      |
| 30   | 10     | 20     | —       | 30    | 10      | 21      | —        | 1107.1776                  | 93.4                  | 2                          | I                      |
| 17   | 13     | 5      | +       | 17    | 13      | 4       | +        | 1107.1834                  | 72.3                  | 0                          | I                      |
| 17   | 13     | 5      | —       | 17    | 13      | 4       | —        | 1107.1923                  | 74.7                  | 0                          | I                      |
| 60   | 8      | 52     | +       | 60    | 8       | 53      | +        | 1107.2257                  | 82.6                  | -1                         | I                      |
| 22   | 12     | 10     | +       | 22    | 12      | 11      | +        | 1107.2257                  | 82.6                  | 0                          | I                      |
| 48   | 7      | 41     | +       | 48    | 7       | 42      | +        | 1107.2322                  | 82.8                  | 1                          | I                      |
| 22   | 12     | 10     | —       | 22    | 12      | 11      | —        | 1107.2322                  | 82.8                  | 0                          | I                      |
| 32   | 9      | 23     | +       | 32    | 9       | 24      | +        | 1107.2367                  | 67.9                  | -6                         | I                      |
| 16   | 13     | 3      | +       | 16    | 13      | 4       | +        | 1107.2367                  | 67.9                  | 1                          | I                      |
| 26   | 11     | 15     | +       | 26    | 11      | 16      | +        | 1107.2412                  | 84.1                  | -1                         | I                      |
| 32   | 9      | 23     | —       | 32    | 9       | 24      | —        | 1107.2412                  | 84.1                  | 3                          | I                      |

| $N'$ | $K'_a$ | $K'_c$ | $J'^a)$ | $N''$ | $K''_a$ | $K''_c$ | $J''^b)$ | $\nu$ , exp. <sup>c)</sup> | Transm. <sup>d)</sup> | $\delta_\nu$ <sup>e)</sup> | Spectrum <sup>f)</sup> |
|------|--------|--------|---------|-------|---------|---------|----------|----------------------------|-----------------------|----------------------------|------------------------|
|      |        | 1      |         |       |         | 2       |          | 3                          | 4                     | 5                          | 6                      |
| 26   | 11     | 15     | —       | 26    | 11      | 16      | —        | 1107.2460                  | 65.8                  | -4                         | I                      |
| 16   | 13     | 3      | —       | 16    | 13      | 4       | —        | 1107.2460                  | 65.8                  | 1                          | I                      |
| 34   | 8      | 26     | —       | 34    | 8       | 27      | —        | 1107.2615                  | 72.6                  | -5                         | I                      |
| 29   | 10     | 20     | +       | 29    | 10      | 19      | +        | 1107.2696                  | 91.7                  | -1                         | I                      |
| 29   | 10     | 20     | —       | 29    | 10      | 19      | —        | 1107.2740                  | 92.2                  | 1                          | I                      |
| 15   | 13     | 3      | +       | 15    | 13      | 2       | +        | 1107.2867                  | 66.5                  | 0                          | I                      |
| 21   | 12     | 10     | +       | 21    | 12      | 9       | +        | 1107.2961                  | 62.7                  | 9                          | I                      |
| 15   | 13     | 3      | —       | 15    | 13      | 2       | —        | 1107.2961                  | 62.7                  | -4                         | I                      |
| 21   | 12     | 10     | —       | 21    | 12      | 9       | —        | 1107.3020                  | 82.0                  | 0                          | I                      |
| 35   | 7      | 29     | —       | 35    | 7       | 28      | —        | 1107.3193                  | 92.6                  | -9                         | I                      |
| 25   | 11     | 15     | +       | 25    | 11      | 14      | +        | 1107.3240                  | 80.3                  | -2                         | I                      |
| 25   | 11     | 15     | —       | 25    | 11      | 14      | —        | 1107.3295                  | 85.0                  | 0                          | I                      |
| 14   | 13     | 1      | +       | 14    | 13      | 2       | +        | 1107.3336                  | 63.9                  | 0                          | I                      |
| 31   | 9      | 23     | —       | 31    | 9       | 22      | —        | 1107.3439                  | 62.8                  | -5                         | I                      |
| 14   | 13     | 1      | —       | 14    | 13      | 2       | —        | 1107.3439                  | 62.8                  | 0                          | I                      |
| 28   | 10     | 18     | +       | 28    | 10      | 19      | +        | 1107.3619                  | 75.5                  | -8                         | I                      |
| 20   | 12     | 8      | +       | 20    | 12      | 9       | +        | 1107.3619                  | 75.5                  | 3                          | I                      |
| 33   | 8      | 26     | +       | 33    | 8       | 25      | +        | 1107.3684                  | 75.9                  | 9                          | I                      |
| 20   | 12     | 8      | —       | 20    | 12      | 9       | —        | 1107.3684                  | 75.9                  | -2                         | I                      |
| 13   | 13     | 1      | +       | 13    | 13      | 0       | +        | 1107.3774                  | 60.8                  | 0                          | I                      |
| 13   | 13     | 1      | —       | 13    | 13      | 0       | —        | 1107.3882                  | 63.4                  | 0                          | I                      |
| 24   | 11     | 13     | +       | 24    | 11      | 14      | +        | 1107.4039                  | 85.7                  | 0                          | I                      |
| 24   | 11     | 13     | —       | 24    | 11      | 14      | —        | 1107.4093                  | 85.4                  | 0                          | I                      |
| 19   | 12     | 8      | +       | 19    | 12      | 7       | +        | 1107.4247                  | 74.7                  | -2                         | I                      |
| 19   | 12     | 8      | —       | 19    | 12      | 7       | —        | 1107.4320                  | 78.8                  | 0                          | I                      |
| 30   | 9      | 21     | +       | 30    | 9       | 22      | +        | 1107.4411                  | 91.1                  | 1                          | I                      |
| 30   | 9      | 21     | —       | 30    | 9       | 22      | —        | 1107.4448                  | 91.6                  | 2                          | I                      |
| 27   | 10     | 18     | +       | 27    | 10      | 17      | +        | 1107.4525                  | 88.0                  | -1                         | I                      |
| 27   | 10     | 18     | —       | 27    | 10      | 17      | —        | 1107.4574                  | 54.0                  | 4                          | I                      |
| 32   | 8      | 24     | +       | 32    | 8       | 25      | +        | 1107.4760                  | 94.5                  | -1                         | I                      |
| 32   | 8      | 24     | —       | 32    | 8       | 25      | —        | 1107.4802                  | 82.7                  | 10                         | I                      |
| 23   | 11     | 13     | +       | 23    | 11      | 12      | +        | 1107.4802                  | 82.7                  | -1                         | I                      |
| 23   | 11     | 13     | —       | 23    | 11      | 12      | —        | 1107.4852                  | 68.8                  | -7                         | I                      |
| 18   | 12     | 6      | +       | 18    | 12      | 7       | +        | 1107.4852                  | 68.8                  | 3                          | I                      |
| 34   | 7      | 27     | —       | 34    | 7       | 28      | —        | 1107.4923                  | 74.8                  | 3                          | I                      |
| 18   | 12     | 6      | —       | 18    | 12      | 7       | —        | 1107.4923                  | 74.8                  | 0                          | I                      |
| 3    | 3      | 1      | +       | 4     | 3       | 2       | +        | 1107.5055                  | 88.0                  | 0                          | I                      |
| 26   | 10     | 16     | —       | 26    | 10      | 17      | —        | 1107.5417                  | 66.2                  | -20                        | I                      |
| 17   | 12     | 6      | +       | 17    | 12      | 5       | +        | 1107.5417                  | 66.2                  | 0                          | I                      |
| 29   | 9      | 21     | —       | 29    | 9       | 20      | —        | 1107.5417                  | 66.2                  | 2                          | I                      |
| 17   | 12     | 6      | —       | 17    | 12      | 5       | —        | 1107.5495                  | 72.9                  | 0                          | I                      |
| 22   | 11     | 11     | +       | 22    | 11      | 12      | +        | 1107.5536                  | 81.5                  | 0                          | I                      |
| 33   | 6      | 28     | +       | 33    | 6       | 27      | +        | 1107.5592                  | 82.1                  | 5                          | I                      |
| 22   | 11     | 11     | —       | 22    | 11      | 12      | —        | 1107.5592                  | 82.1                  | 0                          | I                      |
| 33   | 7      | 27     | —       | 33    | 7       | 26      | —        | 1107.5647                  | 93.3                  | 0                          | I                      |
| 25   | 4      | 22     | —       | 25    | 4       | 21      | —        | 1107.5647                  | 93.3                  | 1                          | I                      |
| 31   | 8      | 24     | —       | 31    | 8       | 23      | —        | 1107.5834                  | 83.6                  | 9                          | I                      |
| 3    | 2      | 2      | +       | 4     | 2       | 3       | +        | 1107.5873                  | 74.5                  | -2                         | I                      |
| 3    | 2      | 2      | —       | 4     | 2       | 3       | —        | 1107.5954                  | 62.5                  | -12                        | I                      |
| 16   | 12     | 4      | +       | 16    | 12      | 5       | +        | 1107.5954                  | 62.5                  | 1                          | I                      |
| 16   | 12     | 4      | —       | 16    | 12      | 5       | —        | 1107.6034                  | 71.7                  | 0                          | I                      |
| 21   | 11     | 11     | +       | 21    | 11      | 10      | +        | 1107.6233                  | 74.5                  | -4                         | I                      |
| 21   | 11     | 11     | —       | 21    | 11      | 10      | —        | 1107.6295                  | 79.8                  | 1                          | I                      |
| 28   | 9      | 19     | —       | 28    | 9       | 20      | —        | 1107.6353                  | 91.6                  | 2                          | I                      |
| 15   | 12     | 4      | +       | 15    | 12      | 3       | +        | 1107.6457                  | 67.1                  | 0                          | I                      |
| 15   | 12     | 4      | —       | 15    | 12      | 3       | —        | 1107.6543                  | 66.3                  | 1                          | I                      |
| 30   | 8      | 22     | +       | 30    | 8       | 23      | +        | 1107.6803                  | 93.4                  | -1                         | I                      |
| 30   | 8      | 22     | —       | 30    | 8       | 23      | —        | 1107.6837                  | 94.0                  | 1                          | I                      |
| 14   | 12     | 2      | +       | 14    | 12      | 3       | +        | 1107.6929                  | 63.0                  | 0                          | I                      |
| 32   | 7      | 25     | +       | 32    | 7       | 26      | +        | 1107.6963                  | 77.2                  | 10                         | I                      |
| 20   | 11     | 9      | —       | 20    | 11      | 10      | —        | 1107.6963                  | 77.2                  | 0                          | I                      |
| 14   | 12     | 2      | —       | 14    | 12      | 3       | —        | 1107.7020                  | 59.9                  | 2                          | I                      |
| 24   | 10     | 14     | —       | 24    | 10      | 15      | —        | 1107.7074                  | 86.4                  | 1                          | I                      |
| 27   | 9      | 19     | +       | 27    | 9       | 18      | +        | 1107.7217                  | 90.9                  | -1                         | I                      |
| 27   | 9      | 19     | —       | 27    | 9       | 18      | —        | 1107.7257                  | 90.7                  | 2                          | I                      |
| 13   | 12     | 2      | +       | 13    | 12      | 1       | +        | 1107.7370                  | 61.3                  | 0                          | I                      |
| 3    | 1      | 3      | —       | 4     | 1       | 4       | —        | 1107.7463                  | 47.7                  | 2                          | I                      |
| 13   | 12     | 2      | —       | 13    | 12      | 1       | —        | 1107.7463                  | 47.7                  | -1                         | I                      |
| 19   | 11     | 9      | +       | 19    | 11      | 8       | +        | 1107.7539                  | 77.8                  | 0                          | I                      |
| 19   | 11     | 9      | —       | 19    | 11      | 8       | —        | 1107.7602                  | 78.4                  | 1                          | I                      |
| 12   | 12     | 0      | +       | 12    | 12      | 1       | +        | 1107.7778                  | 52.4                  | 0                          | I                      |
| 29   | 8      | 22     | +       | 29    | 8       | 21      | +        | 1107.7778                  | 52.4                  | 3                          | I                      |

| $N'$ | $K'_a$ | $K'_c$ | $J'^a)$ | $N''$ | $K''_a$ | $K''_c$ | $J''^b)$ | $\nu$ , exp. <sup>c)</sup> | Transm. <sup>d)</sup> | $\delta_\nu$ <sup>e)</sup> | Spectrum <sup>f)</sup> |
|------|--------|--------|---------|-------|---------|---------|----------|----------------------------|-----------------------|----------------------------|------------------------|
|      |        | 1      |         |       |         | 2       |          | 3                          | 4                     | 5                          | 6                      |
| 31   | 7      | 25     | +       | 31    | 7       | 24      | +        | 1107.7842                  | 79.7                  | 9                          | I                      |
| 23   | 10     | 14     | —       | 23    | 10      | 13      | —        | 1107.7842                  | 79.7                  | 0                          | I                      |
| 12   | 12     | 0      | —       | 12    | 12      | 1       | —        | 1107.7877                  | 58.3                  | 0                          | I                      |
| 29   | 5      | 25     | +       | 29    | 5       | 24      | +        | 1107.7976                  | 95.5                  | -2                         | I                      |
| 26   | 9      | 17     | +       | 26    | 9       | 18      | +        | 1107.8088                  | 86.0                  | 1                          | I                      |
| 18   | 11     | 7      | +       | 18    | 11      | 8       | +        | 1107.8142                  | 72.5                  | -1                         | I                      |
| 18   | 11     | 7      | —       | 18    | 11      | 8       | —        | 1107.8206                  | 58.6                  | -1                         | I                      |
| 19   | 3      | 17     | —       | 19    | 3       | 16      | —        | 1107.8364                  | 96.1                  | -1                         | I                      |
| 22   | 10     | 12     | +       | 22    | 10      | 13      | +        | 1107.8531                  | 83.0                  | 0                          | I                      |
| 19   | 3      | 17     | +       | 19    | 3       | 16      | +        | 1107.8580                  | 82.1                  | 2                          | I                      |
| 22   | 10     | 12     | —       | 22    | 10      | 13      | —        | 1107.8580                  | 82.1                  | 1                          | I                      |
| 31   | 6      | 26     | +       | 31    | 6       | 25      | +        | 1107.8711                  | 59.3                  | -9                         | I                      |
| 17   | 11     | 7      | +       | 17    | 11      | 6       | +        | 1107.8711                  | 59.3                  | -3                         | I                      |
| 28   | 8      | 20     | +       | 28    | 8       | 21      | +        | 1107.8711                  | 59.3                  | -6                         | I                      |
| 17   | 11     | 7      | —       | 17    | 11      | 6       | —        | 1107.8781                  | 66.7                  | 0                          | I                      |
| 25   | 9      | 17     | +       | 25    | 9       | 16      | +        | 1107.8925                  | 88.9                  | 0                          | I                      |
| 25   | 9      | 17     | —       | 25    | 9       | 16      | —        | 1107.8963                  | 86.3                  | 0                          | I                      |
| 16   | 11     | 5      | +       | 16    | 11      | 6       | +        | 1107.9252                  | 67.2                  | -2                         | I                      |
| 21   | 10     | 12     | —       | 21    | 10      | 11      | —        | 1107.9284                  | 79.4                  | 0                          | I                      |
| 34   | 6      | 28     | —       | 34    | 6       | 29      | —        | 1107.9284                  | 79.4                  | -2                         | I                      |
| 16   | 11     | 5      | —       | 16    | 11      | 6       | —        | 1107.9324                  | 71.7                  | 0                          | I                      |
| 24   | 9      | 15     | —       | 24    | 9       | 16      | —        | 1107.9778                  | 50.3                  | 9                          | I                      |
| 15   | 11     | 5      | —       | 15    | 11      | 4       | —        | 1107.9834                  | 69.2                  | 0                          | I                      |
| 20   | 10     | 10     | +       | 20    | 10      | 11      | +        | 1107.9905                  | 79.4                  | -1                         | I                      |
| 20   | 10     | 10     | —       | 20    | 10      | 11      | —        | 1107.9958                  | 81.8                  | 1                          | I                      |
| 32   | 6      | 26     | +       | 32    | 6       | 27      | +        | 1108.0073                  | 96.0                  | 1                          | I                      |
| 14   | 11     | 3      | +       | 14    | 11      | 4       | +        | 1108.0236                  | 64.9                  | 0                          | I                      |
| 14   | 11     | 3      | —       | 14    | 11      | 4       | —        | 1108.0312                  | 66.4                  | 0                          | I                      |
| 23   | 9      | 15     | +       | 23    | 9       | 14      | +        | 1108.0500                  | 79.3                  | -1                         | I                      |
| 26   | 8      | 18     | +       | 26    | 8       | 19      | +        | 1108.0500                  | 79.3                  | 2                          | I                      |
| 26   | 8      | 18     | —       | 26    | 8       | 19      | —        | 1108.0542                  | 66.2                  | 11                         | I                      |
| 23   | 9      | 15     | —       | 23    | 9       | 14      | —        | 1108.0542                  | 66.2                  | 0                          | I                      |
| 19   | 10     | 10     | +       | 19    | 10      | 9       | +        | 1108.0542                  | 66.2                  | -3                         | I                      |
| 19   | 10     | 10     | —       | 19    | 10      | 9       | —        | 1108.0597                  | 79.7                  | 0                          | I                      |
| 13   | 11     | 3      | +       | 13    | 11      | 2       | +        | 1108.0678                  | 62.5                  | 0                          | I                      |
| 13   | 11     | 3      | —       | 13    | 11      | 2       | —        | 1108.0759                  | 64.4                  | 0                          | I                      |
| 28   | 7      | 21     | +       | 28    | 7       | 22      | +        | 1108.0850                  | 93.6                  | 1                          | I                      |
| 12   | 11     | 1      | +       | 12    | 11      | 2       | +        | 1108.1089                  | 58.6                  | 0                          | I                      |
| 12   | 11     | 1      | —       | 12    | 11      | 2       | —        | 1108.1174                  | 58.1                  | -1                         | I                      |
| 18   | 10     | 8      | —       | 18    | 10      | 9       | —        | 1108.1206                  | 75.1                  | 0                          | I                      |
| 29   | 6      | 24     | +       | 29    | 6       | 23      | +        | 1108.1242                  | 80.3                  | -4                         | I                      |
| 22   | 9      | 13     | +       | 22    | 9       | 14      | +        | 1108.1242                  | 80.3                  | 1                          | I                      |
| 22   | 9      | 13     | —       | 22    | 9       | 14      | —        | 1108.1282                  | 84.4                  | 0                          | I                      |
| 25   | 8      | 18     | —       | 25    | 8       | 17      | —        | 1108.1368                  | 73.9                  | -4                         | I                      |
| 30   | 6      | 24     | +       | 30    | 6       | 25      | +        | 1108.1415                  | 85.9                  | 3                          | I                      |
| 11   | 11     | 1      | +       | 11    | 11      | 0       | +        | 1108.1467                  | 53.0                  | 0                          | I                      |
| 11   | 11     | 1      | —       | 11    | 11      | 0       | —        | 1108.1559                  | 57.0                  | 0                          | I                      |
| 17   | 10     | 8      | +       | 17    | 10      | 7       | +        | 1108.1727                  | 50.7                  | 1                          | I                      |
| 2    | 1      | 1      | +       | 3     | 1       | 2       | +        | 1108.1727                  | 50.7                  | 2                          | I                      |
| 27   | 7      | 21     | +       | 27    | 7       | 20      | +        | 1108.1727                  | 50.7                  | -7                         | I                      |
| 2    | 1      | 1      | —       | 3     | 1       | 2       | —        | 1108.1727                  | 50.7                  | -5                         | I                      |
| 17   | 10     | 8      | —       | 17    | 10      | 7       | —        | 1108.1782                  | 75.1                  | 0                          | I                      |
| 21   | 9      | 13     | +       | 21    | 9       | 12      | +        | 1108.1949                  | 82.6                  | 1                          | I                      |
| 21   | 9      | 13     | —       | 21    | 9       | 12      | —        | 1108.1985                  | 81.2                  | -5                         | I                      |
| 24   | 8      | 16     | +       | 24    | 8       | 17      | +        | 1108.2149                  | 63.8                  | 1                          | I                      |
| 24   | 8      | 16     | —       | 24    | 8       | 17      | —        | 1108.2149                  | 63.8                  | -32                        | I                      |
| 16   | 10     | 6      | +       | 16    | 10      | 7       | +        | 1108.2268                  | 72.3                  | 0                          | I                      |
| 27   | 5      | 23     | —       | 27    | 5       | 22      | —        | 1108.2327                  | 71.0                  | 5                          | I                      |
| 16   | 10     | 6      | —       | 16    | 10      | 7       | —        | 1108.2327                  | 71.0                  | 0                          | I                      |
| 26   | 7      | 19     | +       | 26    | 7       | 20      | +        | 1108.2625                  | 75.4                  | -4                         | I                      |
| 20   | 9      | 11     | +       | 20    | 9       | 12      | +        | 1108.2625                  | 75.4                  | 2                          | I                      |
| 20   | 9      | 11     | —       | 20    | 9       | 12      | —        | 1108.2664                  | 75.3                  | -2                         | I                      |
| 26   | 7      | 19     | —       | 26    | 7       | 20      | —        | 1108.2664                  | 75.3                  | 7                          | I                      |
| 2    | 0      | 2      | —       | 3     | 0       | 3       | —        | 1108.2720                  | 80.9                  | 2                          | I                      |
| 23   | 4      | 20     | +       | 23    | 4       | 19      | +        | 1108.2746                  | 73.5                  | -6                         | I                      |
| 2    | 0      | 2      | +       | 3     | 0       | 3       | +        | 1108.2746                  | 73.5                  | 0                          | I                      |
| 15   | 10     | 6      | +       | 15    | 10      | 5       | +        | 1108.2777                  | 68.2                  | -1                         | I                      |
| 15   | 10     | 6      | —       | 15    | 10      | 5       | —        | 1108.2839                  | 71.1                  | 0                          | I                      |
| 23   | 8      | 16     | +       | 23    | 8       | 15      | +        | 1108.2926                  | 85.5                  | 3                          | I                      |
| 23   | 8      | 16     | —       | 23    | 8       | 15      | —        | 1108.2960                  | 85.6                  | 3                          | I                      |
| 28   | 6      | 22     | +       | 28    | 6       | 23      | +        | 1108.2960                  | 85.6                  | -12                        | I                      |
| 28   | 6      | 22     | —       | 28    | 6       | 23      | —        | 1108.3003                  | 47.6                  | 0                          | II                     |



| $N'$ | $K'_a$ | $K'_c$ | $J'^a)$ | $N''$ | $K''_a$ | $K''_c$ | $J''^b)$ | $\nu$ , exp. <sup>c)</sup> | Transm. <sup>d)</sup> | $\delta_\nu$ <sup>e)</sup> | Spectrum <sup>f)</sup> |
|------|--------|--------|---------|-------|---------|---------|----------|----------------------------|-----------------------|----------------------------|------------------------|
|      |        | 1      |         |       |         | 2       |          | 3                          | 4                     | 5                          | 6                      |
| 14   | 10     | 4      | +       | 14    | 10      | 5       | +        | 1108.3257                  | 58.0                  | 2                          | I                      |
| 19   | 9      | 11     | +       | 19    | 9       | 10      | +        | 1108.3257                  | 58.0                  | -7                         | I                      |
| 14   | 10     | 4      | -       | 14    | 10      | 5       | -        | 1108.3317                  | 60.9                  | -3                         | I                      |
| 19   | 9      | 11     | -       | 19    | 9       | 10      | -        | 1108.3317                  | 60.9                  | 8                          | I                      |
| 27   | 6      | 22     | +       | 27    | 6       | 21      | +        | 1108.3382                  | 92.5                  | 9                          | I                      |
| 25   | 7      | 19     | +       | 25    | 7       | 18      | +        | 1108.3466                  | 89.5                  | 2                          | I                      |
| 25   | 7      | 19     | -       | 25    | 7       | 18      | -        | 1108.3490                  | 90.4                  | -2                         | I                      |
| 22   | 8      | 14     | +       | 22    | 8       | 15      | +        | 1108.3667                  | 82.4                  | 1                          | I                      |
| 13   | 10     | 4      | +       | 13    | 10      | 3       | +        | 1108.3703                  | 43.5                  | 2                          | I                      |
| 22   | 8      | 14     | -       | 22    | 8       | 15      | -        | 1108.3703                  | 43.5                  | 2                          | I                      |
| 13   | 10     | 4      | -       | 13    | 10      | 3       | -        | 1108.3768                  | 61.5                  | -1                         | I                      |
| 18   | 9      | 9      | +       | 18    | 9       | 10      | +        | 1108.3870                  | 65.9                  | -4                         | I                      |
| 18   | 9      | 9      | -       | 18    | 9       | 10      | -        | 1108.3919                  | 79.2                  | 0                          | I                      |
| 12   | 10     | 2      | +       | 12    | 10      | 3       | +        | 1108.4113                  | 58.8                  | 0                          | I                      |
| 12   | 10     | 2      | -       | 12    | 10      | 3       | -        | 1108.4186                  | 63.1                  | 0                          | I                      |
| 24   | 7      | 17     | -       | 24    | 7       | 18      | -        | 1108.4309                  | 90.2                  | 0                          | I                      |
| 21   | 8      | 14     | +       | 21    | 8       | 13      | +        | 1108.4376                  | 84.3                  | 0                          | I                      |
| 21   | 8      | 14     | -       | 21    | 8       | 13      | -        | 1108.4413                  | 84.7                  | 2                          | I                      |
| 17   | 9      | 9      | +       | 17    | 9       | 8       | +        | 1108.4451                  | 75.0                  | 0                          | I                      |
| 17   | 9      | 9      | -       | 17    | 9       | 8       | -        | 1108.4495                  | 45.5                  | -3                         | I                      |
| 11   | 10     | 2      | +       | 11    | 10      | 1       | +        | 1108.4495                  | 45.5                  | 1                          | I                      |
| 11   | 10     | 2      | -       | 11    | 10      | 1       | -        | 1108.4588                  | 49.7                  | 17                         | I                      |
| 26   | 6      | 20     | -       | 26    | 6       | 21      | -        | 1108.4588                  | 49.7                  | -31                        | I                      |
| 26   | 6      | 20     | +       | 26    | 6       | 21      | +        | 1108.4588                  | 49.7                  | -4                         | I                      |
| 10   | 10     | 0      | +       | 10    | 10      | 1       | +        | 1108.4842                  | 51.5                  | 0                          | I                      |
| 10   | 10     | 0      | -       | 10    | 10      | 1       | -        | 1108.4925                  | 54.5                  | 0                          | I                      |
| 16   | 9      | 7      | +       | 16    | 9       | 8       | +        | 1108.4995                  | 73.2                  | 0                          | I                      |
| 16   | 9      | 7      | -       | 16    | 9       | 8       | -        | 1108.5049                  | 61.2                  | 5                          | I                      |
| 23   | 7      | 17     | +       | 23    | 7       | 16      | +        | 1108.5049                  | 61.2                  | -8                         | I                      |
| 20   | 8      | 12     | +       | 20    | 8       | 13      | +        | 1108.5049                  | 61.2                  | -4                         | I                      |
| 23   | 7      | 17     | -       | 23    | 7       | 16      | -        | 1108.5088                  | 76.5                  | 3                          | I                      |
| 20   | 8      | 12     | -       | 20    | 8       | 13      | -        | 1108.5088                  | 76.5                  | -1                         | I                      |
| 25   | 6      | 20     | -       | 25    | 6       | 19      | -        | 1108.5249                  | 91.2                  | 2                          | I                      |
| 25   | 5      | 21     | +       | 25    | 5       | 20      | +        | 1108.5507                  | 66.7                  | 1                          | I                      |
| 25   | 5      | 21     | -       | 25    | 5       | 20      | -        | 1108.5507                  | 66.7                  | 10                         | I                      |
| 15   | 9      | 7      | +       | 15    | 9       | 6       | +        | 1108.5507                  | 66.7                  | -1                         | I                      |
| 15   | 9      | 7      | -       | 15    | 9       | 6       | -        | 1108.5559                  | 72.3                  | 0                          | I                      |
| 19   | 8      | 12     | +       | 19    | 8       | 11      | +        | 1108.5692                  | 67.7                  | -6                         | I                      |
| 19   | 8      | 12     | -       | 19    | 8       | 11      | -        | 1108.5735                  | 66.1                  | 1                          | I                      |
| 22   | 7      | 15     | -       | 22    | 7       | 16      | -        | 1108.5809                  | 65.1                  | -24                        | I                      |
| 22   | 7      | 15     | +       | 22    | 7       | 16      | +        | 1108.5809                  | 65.1                  | 4                          | I                      |
| 14   | 9      | 5      | +       | 14    | 9       | 6       | +        | 1108.5987                  | 68.2                  | 0                          | I                      |
| 14   | 9      | 5      | -       | 14    | 9       | 6       | -        | 1108.6041                  | 68.8                  | 0                          | I                      |
| 17   | 3      | 15     | +       | 17    | 3       | 14      | +        | 1108.6175                  | 88.5                  | 3                          | I                      |
| 24   | 6      | 18     | +       | 24    | 6       | 19      | +        | 1108.6175                  | 88.5                  | 0                          | I                      |
| 24   | 6      | 18     | -       | 24    | 6       | 19      | -        | 1108.6175                  | 88.5                  | -26                        | I                      |
| 18   | 8      | 10     | +       | 18    | 8       | 11      | +        | 1108.6308                  | 77.5                  | -1                         | I                      |
| 18   | 8      | 10     | -       | 18    | 8       | 11      | -        | 1108.6349                  | 81.1                  | 1                          | I                      |
| 13   | 9      | 5      | +       | 13    | 9       | 4       | +        | 1108.6435                  | 65.7                  | 0                          | I                      |
| 13   | 9      | 5      | -       | 13    | 9       | 4       | -        | 1108.6492                  | 65.7                  | 1                          | I                      |
| 21   | 7      | 15     | -       | 21    | 7       | 14      | -        | 1108.6545                  | 85.7                  | -1                         | I                      |
| 12   | 9      | 3      | +       | 12    | 9       | 4       | +        | 1108.6850                  | 45.1                  | 0                          | I                      |
| 12   | 9      | 3      | -       | 12    | 9       | 4       | -        | 1108.6909                  | 57.0                  | -1                         | I                      |
| 17   | 8      | 10     | +       | 17    | 8       | 9       | +        | 1108.6909                  | 57.0                  | 20                         | I                      |
| 23   | 6      | 18     | -       | 23    | 6       | 17      | -        | 1108.6909                  | 57.0                  | 11                         | I                      |
| 17   | 8      | 10     | -       | 17    | 8       | 9       | -        | 1108.6909                  | 57.0                  | -19                        | I                      |
| 20   | 7      | 13     | +       | 20    | 7       | 14      | +        | 1108.7231                  | 50.9                  | 34                         | I                      |
| 11   | 9      | 3      | +       | 11    | 9       | 2       | +        | 1108.7231                  | 50.9                  | -1                         | I                      |
| 20   | 7      | 13     | -       | 20    | 7       | 14      | -        | 1108.7231                  | 50.9                  | 4                          | I                      |
| 11   | 9      | 3      | -       | 11    | 9       | 2       | -        | 1108.7297                  | 58.2                  | 1                          | I                      |
| 16   | 8      | 8      | +       | 16    | 8       | 9       | +        | 1108.7437                  | 75.7                  | 0                          | I                      |
| 16   | 8      | 8      | -       | 16    | 8       | 9       | -        | 1108.7477                  | 77.1                  | 0                          | I                      |
| 10   | 9      | 1      | +       | 10    | 9       | 2       | +        | 1108.7583                  | 52.1                  | 0                          | I                      |
| 10   | 9      | 1      | -       | 10    | 9       | 2       | -        | 1108.7652                  | 56.3                  | 1                          | I                      |
| 22   | 6      | 16     | -       | 22    | 6       | 17      | -        | 1108.7688                  | 72.4                  | -11                        | I                      |
| 22   | 6      | 16     | +       | 22    | 6       | 17      | +        | 1108.7688                  | 72.4                  | 14                         | I                      |
| 19   | 7      | 13     | +       | 19    | 7       | 12      | +        | 1108.7848                  | 75.8                  | 4                          | I                      |
| 23   | 5      | 19     | +       | 23    | 5       | 18      | +        | 1108.7848                  | 75.8                  | -3                         | I                      |
| 23   | 5      | 19     | -       | 23    | 5       | 18      | -        | 1108.7848                  | 75.8                  | -8                         | I                      |
| 9    | 9      | 1      | +       | 9     | 9       | 0       | +        | 1108.7900                  | 48.2                  | 0                          | I                      |
| 15   | 8      | 8      | -       | 15    | 8       | 7       | -        | 1108.7976                  | 48.5                  | -17                        | I                      |
| 9    | 9      | 1      | -       | 9     | 9       | 0       | -        | 1108.7976                  | 48.5                  | 1                          | I                      |

| $N'$ | $K'_a$ | $K'_c$ | $J'^a)$ | $N''$ | $K''_a$ | $K''_c$ | $J''^b)$ | $\nu$ , exp. <sup>c)</sup> | Transm. <sup>d)</sup> | $\delta_\nu$ <sup>e)</sup> | Spectrum <sup>f)</sup> |
|------|--------|--------|---------|-------|---------|---------|----------|----------------------------|-----------------------|----------------------------|------------------------|
|      |        | 1      |         |       |         | 2       |          | 3                          | 4                     | 5                          | 6                      |
| 15   | 8      | 8      | +       | 15    | 8       | 7       | +        | 1108.7976                  | 48.5                  | 25                         | I                      |
| 28   | 5      | 23     | -       | 28    | 5       | 24      | -        | 1108.8136                  | 96.5                  | 2                          | I                      |
| 21   | 6      | 16     | +       | 21    | 6       | 15      | +        | 1108.8362                  | 88.2                  | 1                          | I                      |
| 21   | 6      | 16     | -       | 21    | 6       | 15      | -        | 1108.8384                  | 88.6                  | 0                          | I                      |
| 14   | 8      | 6      | +       | 14    | 8       | 7       | +        | 1108.8433                  | 70.2                  | 1                          | I                      |
| 18   | 7      | 11     | +       | 18    | 7       | 12      | +        | 1108.8478                  | 65.7                  | 19                         | I                      |
| 18   | 7      | 11     | -       | 18    | 7       | 12      | -        | 1108.8478                  | 65.7                  | -12                        | I                      |
| 14   | 8      | 6      | -       | 14    | 8       | 7       | -        | 1108.8478                  | 65.7                  | 1                          | I                      |
| 24   | 5      | 19     | +       | 24    | 5       | 20      | +        | 1108.8597                  | 94.2                  | -1                         | I                      |
| 24   | 5      | 19     | -       | 24    | 5       | 20      | -        | 1108.8640                  | 94.5                  | 0                          | I                      |
| 13   | 8      | 6      | +       | 13    | 8       | 5       | +        | 1108.8881                  | 68.9                  | 0                          | I                      |
| 13   | 8      | 6      | -       | 13    | 8       | 5       | -        | 1108.8929                  | 69.2                  | 0                          | I                      |
| 17   | 7      | 11     | +       | 17    | 7       | 10      | +        | 1108.9042                  | 74.3                  | 2                          | I                      |
| 20   | 6      | 14     | -       | 20    | 6       | 15      | -        | 1108.9074                  | 70.6                  | -11                        | I                      |
| 17   | 7      | 11     | -       | 17    | 7       | 10      | -        | 1108.9074                  | 70.6                  | 1                          | I                      |
| 20   | 6      | 14     | +       | 20    | 6       | 15      | +        | 1108.9074                  | 70.6                  | 14                         | I                      |
| 1    | 1      | 1      | +       | 2     | 1       | 2       | +        | 1108.9199                  | 67.2                  | -2                         | I                      |
| 12   | 8      | 4      | +       | 12    | 8       | 5       | +        | 1108.9299                  | 64.2                  | 0                          | I                      |
| 12   | 8      | 4      | -       | 12    | 8       | 5       | -        | 1108.9348                  | 63.4                  | 1                          | I                      |
| 16   | 7      | 9      | +       | 16    | 7       | 10      | +        | 1108.9590                  | 77.8                  | 0                          | I                      |
| 16   | 7      | 9      | -       | 16    | 7       | 10      | -        | 1108.9648                  | 52.0                  | 25                         | I                      |
| 22   | 5      | 17     | -       | 22    | 5       | 18      | -        | 1108.9648                  | 52.0                  | 0                          | I                      |
| 21   | 5      | 17     | -       | 21    | 5       | 16      | -        | 1108.9685                  | 49.7                  | -9                         | I                      |
| 19   | 6      | 14     | +       | 19    | 6       | 13      | +        | 1108.9685                  | 49.7                  | -16                        | I                      |
| 11   | 8      | 4      | +       | 11    | 8       | 3       | +        | 1108.9685                  | 49.7                  | 2                          | I                      |
| 21   | 5      | 17     | +       | 21    | 5       | 16      | +        | 1108.9685                  | 49.7                  | 4                          | I                      |
| 11   | 8      | 4      | -       | 11    | 8       | 3       | -        | 1108.9733                  | 57.0                  | -2                         | I                      |
| 19   | 6      | 14     | -       | 19    | 6       | 13      | -        | 1108.9733                  | 57.0                  | 8                          | I                      |
| 10   | 8      | 2      | +       | 10    | 8       | 3       | +        | 1109.0035                  | 58.6                  | 0                          | I                      |
| 10   | 8      | 2      | -       | 10    | 8       | 3       | -        | 1109.0094                  | 55.9                  | 3                          | I                      |
| 15   | 7      | 9      | +       | 15    | 7       | 8       | +        | 1109.0094                  | 55.9                  | -12                        | I                      |
| 15   | 7      | 9      | -       | 15    | 7       | 8       | -        | 1109.0141                  | 77.2                  | 1                          | I                      |
| 18   | 6      | 12     | +       | 18    | 6       | 13      | +        | 1109.0353                  | 48.4                  | 31                         | I                      |
| 18   | 6      | 12     | -       | 18    | 6       | 13      | -        | 1109.0353                  | 48.4                  | 6                          | I                      |
| 9    | 8      | 2      | +       | 9     | 8       | 1       | +        | 1109.0353                  | 48.4                  | -1                         | I                      |
| 9    | 8      | 2      | -       | 9     | 8       | 1       | -        | 1109.0415                  | 57.6                  | 0                          | I                      |
| 14   | 7      | 7      | +       | 14    | 7       | 8       | +        | 1109.0590                  | 74.6                  | 0                          | I                      |
| 14   | 7      | 7      | -       | 14    | 7       | 8       | -        | 1109.0627                  | 45.0                  | 2                          | I                      |
| 8    | 8      | 0      | +       | 8     | 8       | 1       | +        | 1109.0640                  | 45.0                  | -2                         | I                      |
| 8    | 8      | 0      | -       | 8     | 8       | 1       | -        | 1109.0707                  | 52.9                  | 0                          | I                      |
| 20   | 5      | 15     | +       | 20    | 5       | 16      | +        | 1109.0772                  | 74.0                  | -9                         | I                      |
| 19   | 4      | 16     | -       | 19    | 4       | 15      | -        | 1109.0808                  | 67.5                  | 9                          | I                      |
| 20   | 5      | 15     | -       | 20    | 5       | 16      | -        | 1109.0808                  | 67.5                  | 2                          | I                      |
| 17   | 6      | 12     | +       | 17    | 6       | 11      | +        | 1109.0906                  | 82.9                  | 2                          | I                      |
| 17   | 6      | 12     | -       | 17    | 6       | 11      | -        | 1109.0931                  | 82.0                  | 2                          | I                      |
| 13   | 7      | 7      | +       | 13    | 7       | 6       | +        | 1109.1042                  | 72.2                  | 0                          | I                      |
| 13   | 7      | 7      | -       | 13    | 7       | 6       | -        | 1109.1079                  | 73.3                  | 0                          | I                      |
| 19   | 5      | 15     | +       | 19    | 5       | 14      | +        | 1109.1186                  | 81.7                  | 8                          | I                      |
| 19   | 5      | 15     | -       | 19    | 5       | 14      | -        | 1109.1186                  | 81.7                  | -9                         | I                      |
| 16   | 6      | 10     | -       | 16    | 6       | 11      | -        | 1109.1459                  | 58.3                  | -23                        | I                      |
| 12   | 7      | 5      | +       | 12    | 7       | 6       | +        | 1109.1459                  | 58.3                  | -1                         | I                      |
| 16   | 6      | 10     | +       | 16    | 6       | 11      | +        | 1109.1459                  | 58.3                  | 3                          | I                      |
| 12   | 7      | 5      | -       | 12    | 7       | 6       | -        | 1109.1497                  | 67.8                  | -2                         | I                      |
| 11   | 7      | 5      | +       | 11    | 7       | 4       | +        | 1109.1846                  | 66.0                  | 0                          | I                      |
| 11   | 7      | 5      | -       | 11    | 7       | 4       | -        | 1109.1888                  | 69.0                  | 0                          | I                      |
| 15   | 6      | 10     | +       | 15    | 6       | 9       | +        | 1109.1974                  | 71.8                  | 0                          | I                      |
| 18   | 5      | 13     | -       | 18    | 5       | 14      | -        | 1109.1974                  | 71.8                  | 1                          | I                      |
| 15   | 6      | 10     | -       | 15    | 6       | 9       | -        | 1109.2001                  | 80.1                  | 0                          | I                      |
| 10   | 7      | 3      | +       | 10    | 7       | 4       | +        | 1109.2200                  | 61.4                  | 1                          | I                      |
| 10   | 7      | 3      | -       | 10    | 7       | 4       | -        | 1109.2244                  | 64.0                  | 0                          | I                      |
| 17   | 5      | 13     | -       | 17    | 5       | 12      | -        | 1109.2461                  | 68.1                  | -6                         | I                      |
| 14   | 6      | 8      | +       | 14    | 6       | 9       | +        | 1109.2461                  | 68.1                  | 1                          | I                      |
| 14   | 6      | 8      | -       | 14    | 6       | 9       | -        | 1109.2486                  | 74.8                  | -1                         | I                      |
| 9    | 7      | 3      | +       | 9     | 7       | 2       | +        | 1109.2520                  | 58.7                  | -1                         | I                      |
| 9    | 7      | 3      | -       | 9     | 7       | 2       | -        | 1109.2568                  | 61.3                  | 0                          | I                      |
| 8    | 7      | 1      | +       | 8     | 7       | 2       | +        | 1109.2809                  | 55.0                  | 0                          | I                      |
| 8    | 7      | 1      | -       | 8     | 7       | 2       | -        | 1109.2861                  | 57.9                  | 0                          | I                      |
| 13   | 6      | 8      | +       | 13    | 6       | 7       | +        | 1109.2915                  | 72.8                  | 2                          | I                      |
| 13   | 6      | 8      | -       | 13    | 6       | 7       | -        | 1109.2943                  | 74.9                  | 1                          | I                      |
| 17   | 4      | 14     | +       | 17    | 4       | 13      | +        | 1109.3021                  | 82.8                  | -2                         | I                      |
| 17   | 4      | 14     | -       | 17    | 4       | 13      | -        | 1109.3021                  | 82.8                  | 2                          | I                      |
| 16   | 5      | 11     | -       | 16    | 5       | 12      | -        | 1109.3064                  | 42.8                  | -9                         | I                      |

| $N'$ | $K'_a$ | $K'_c$ | $J'^a)$ | $N''$ | $K''_a$ | $K''_c$ | $J''^b)$ | $\nu$ , exp. <sup>c)</sup> | Transm. <sup>d)</sup> | $\delta_\nu$ <sup>e)</sup> | Spectrum <sup>f)</sup> |
|------|--------|--------|---------|-------|---------|---------|----------|----------------------------|-----------------------|----------------------------|------------------------|
|      |        | 1      |         |       |         | 2       |          | 3                          | 4                     | 5                          | 6                      |
| 7    | 7      | 1      | +       | 7     | 7       | 0       | +        | 1109.3064                  | 42.8                  | 0                          | I                      |
| 7    | 7      | 1      | -       | 7     | 7       | 0       | -        | 1109.3121                  | 53.7                  | 0                          | I                      |
| 12   | 6      | 6      | +       | 12    | 6       | 7       | +        | 1109.3334                  | 74.8                  | 0                          | I                      |
| 12   | 6      | 6      | -       | 12    | 6       | 7       | -        | 1109.3364                  | 76.1                  | 0                          | I                      |
| 15   | 5      | 11     | +       | 15    | 5       | 10      | +        | 1109.3548                  | 83.9                  | 3                          | I                      |
| 11   | 6      | 6      | +       | 11    | 6       | 5       | +        | 1109.3721                  | 70.2                  | 0                          | I                      |
| 11   | 6      | 6      | -       | 11    | 6       | 5       | -        | 1109.3752                  | 71.1                  | -1                         | I                      |
| 14   | 5      | 9      | -       | 14    | 5       | 10      | -        | 1109.4074                  | 61.1                  | 6                          | I                      |
| 10   | 6      | 4      | +       | 10    | 6       | 5       | +        | 1109.4074                  | 61.1                  | -2                         | I                      |
| 10   | 6      | 4      | -       | 10    | 6       | 5       | -        | 1109.4110                  | 71.0                  | 0                          | I                      |
| 18   | 4      | 14     | +       | 18    | 4       | 15      | +        | 1109.4329                  | 91.4                  | 0                          | I                      |
| 18   | 4      | 14     | -       | 18    | 4       | 15      | -        | 1109.4398                  | 60.7                  | 26                         | I                      |
| 9    | 6      | 4      | +       | 9     | 6       | 3       | +        | 1109.4398                  | 60.7                  | 0                          | I                      |
| 20   | 4      | 16     | +       | 20    | 4       | 17      | +        | 1109.4435                  | 63.6                  | -2                         | I                      |
| 9    | 6      | 4      | -       | 9     | 6       | 3       | -        | 1109.4435                  | 63.6                  | 1                          | I                      |
| 15   | 4      | 12     | -       | 15    | 4       | 11      | -        | 1109.4564                  | 74.3                  | -5                         | I                      |
| 15   | 4      | 12     | +       | 15    | 4       | 11      | +        | 1109.4564                  | 74.3                  | 2                          | I                      |
| 8    | 6      | 2      | +       | 8     | 6       | 3       | +        | 1109.4686                  | 58.4                  | -2                         | I                      |
| 8    | 6      | 2      | -       | 8     | 6       | 3       | -        | 1109.4727                  | 64.5                  | 0                          | I                      |
| 13   | 3      | 11     | +       | 13    | 3       | 10      | +        | 1109.4792                  | 83.5                  | -6                         | I                      |
| 16   | 4      | 12     | +       | 16    | 4       | 13      | +        | 1109.4792                  | 83.5                  | 3                          | I                      |
| 7    | 6      | 2      | +       | 7     | 6       | 1       | +        | 1109.4943                  | 45.5                  | -1                         | I                      |
| 12   | 5      | 7      | -       | 12    | 5       | 8       | -        | 1109.4943                  | 45.5                  | 1                          | I                      |
| 7    | 6      | 2      | -       | 7     | 6       | 1       | -        | 1109.4988                  | 55.2                  | 0                          | I                      |
| 0    | 0      | 0      | +       | 1     | 0       | 1       | -        | 1109.4988                  | 55.2                  | 56                         | I                      |
| 6    | 6      | 0      | +       | 6     | 6       | 1       | +        | 1109.5168                  | 51.3                  | 0                          | I                      |
| 6    | 6      | 0      | -       | 6     | 6       | 1       | -        | 1109.5217                  | 55.9                  | 0                          | I                      |
| 11   | 5      | 7      | +       | 11    | 5       | 6       | +        | 1109.5308                  | 74.9                  | 1                          | I                      |
| 11   | 5      | 7      | -       | 11    | 5       | 6       | -        | 1109.5329                  | 77.4                  | -2                         | I                      |
| 14   | 4      | 10     | -       | 14    | 4       | 11      | -        | 1109.5520                  | 84.3                  | -1                         | I                      |
| 22   | 4      | 18     | +       | 22    | 4       | 19      | +        | 1109.5583                  | 90.2                  | 5                          | I                      |
| 10   | 5      | 5      | +       | 10    | 5       | 6       | +        | 1109.5666                  | 72.2                  | 2                          | I                      |
| 22   | 4      | 18     | -       | 22    | 4       | 19      | -        | 1109.5692                  | 65.0                  | 1                          | I                      |
| 10   | 5      | 5      | -       | 10    | 5       | 6       | -        | 1109.5692                  | 65.0                  | 3                          | I                      |
| 9    | 5      | 5      | +       | 9     | 5       | 4       | +        | 1109.5988                  | 71.8                  | 1                          | I                      |
| 9    | 5      | 5      | -       | 9     | 5       | 4       | -        | 1109.6013                  | 74.2                  | 0                          | I                      |
| 12   | 4      | 8      | -       | 12    | 4       | 9       | -        | 1109.6278                  | 58.7                  | -3                         | I                      |
| 8    | 5      | 3      | +       | 8     | 5       | 4       | +        | 1109.6278                  | 58.7                  | 0                          | I                      |
| 8    | 5      | 3      | -       | 8     | 5       | 4       | -        | 1109.6305                  | 68.5                  | -1                         | I                      |
| 7    | 5      | 3      | +       | 7     | 5       | 2       | +        | 1109.6537                  | 62.4                  | 1                          | I                      |
| 7    | 5      | 3      | -       | 7     | 5       | 2       | -        | 1109.6570                  | 58.8                  | 2                          | I                      |
| 11   | 4      | 8      | +       | 11    | 4       | 7       | +        | 1109.6570                  | 58.8                  | -10                        | I                      |
| 6    | 5      | 1      | +       | 6     | 5       | 2       | +        | 1109.6762                  | 58.8                  | 1                          | I                      |
| 6    | 5      | 1      | -       | 6     | 5       | 2       | -        | 1109.6796                  | 53.9                  | 0                          | I                      |
| 5    | 5      | 1      | +       | 5     | 5       | 0       | +        | 1109.6954                  | 52.5                  | 1                          | I                      |
| 5    | 5      | 1      | -       | 5     | 5       | 0       | -        | 1109.6992                  | 50.3                  | -1                         | I                      |
| 10   | 4      | 6      | -       | 10    | 4       | 7       | -        | 1109.6992                  | 50.3                  | 1                          | I                      |
| 9    | 4      | 6      | -       | 9     | 4       | 5       | -        | 1109.7300                  | 63.9                  | 0                          | I                      |
| 3    | 1      | 3      | -       | 3     | 1       | 2       | -        | 1109.7432                  | 97.1                  | 3                          | I                      |
| 8    | 4      | 4      | +       | 8     | 4       | 5       | +        | 1109.7583                  | 73.9                  | 2                          | I                      |
| 7    | 2      | 6      | +       | 7     | 2       | 5       | +        | 1109.7737                  | 72.5                  | -3                         | I                      |
| 7    | 4      | 4      | +       | 7     | 4       | 3       | +        | 1109.7840                  | 71.7                  | 3                          | I                      |
| 6    | 4      | 2      | +       | 6     | 4       | 3       | +        | 1109.8062                  | 57.9                  | -2                         | I                      |
| 9    | 3      | 7      | -       | 9     | 3       | 6       | -        | 1109.8062                  | 57.9                  | 2                          | I                      |
| 9    | 3      | 7      | +       | 9     | 3       | 6       | +        | 1109.8062                  | 57.9                  | 6                          | I                      |
| 5    | 4      | 2      | +       | 5     | 4       | 1       | +        | 1109.8259                  | 56.0                  | 1                          | I                      |
| 5    | 4      | 2      | -       | 5     | 4       | 1       | -        | 1109.8282                  | 62.3                  | -2                         | I                      |
| 24   | 4      | 20     | +       | 24    | 4       | 21      | +        | 1109.8282                  | 62.3                  | -2                         | I                      |
| 4    | 4      | 0      | +       | 4     | 4       | 1       | +        | 1109.8418                  | 52.8                  | 0                          | I                      |
| 10   | 3      | 7      | +       | 10    | 3       | 8       | +        | 1109.8418                  | 52.8                  | 3                          | I                      |
| 24   | 4      | 20     | -       | 24    | 4       | 21      | -        | 1109.8448                  | 58.8                  | -9                         | I                      |
| 4    | 4      | 0      | -       | 4     | 4       | 1       | -        | 1109.8448                  | 58.8                  | -1                         | I                      |
| 10   | 3      | 7      | -       | 10    | 3       | 8       | -        | 1109.8448                  | 58.8                  | 6                          | I                      |
| 12   | 3      | 9      | +       | 12    | 3       | 10      | +        | 1109.8487                  | 88.0                  | -1                         | I                      |
| 12   | 3      | 9      | -       | 12    | 3       | 10      | -        | 1109.8536                  | 91.1                  | 0                          | I                      |
| 8    | 3      | 5      | +       | 8     | 3       | 6       | +        | 1109.8713                  | 68.1                  | 1                          | I                      |
| 8    | 3      | 5      | -       | 8     | 3       | 6       | -        | 1109.8713                  | 68.1                  | -17                        | I                      |
| 7    | 3      | 5      | +       | 7     | 3       | 4       | +        | 1109.8786                  | 59.5                  | -9                         | I                      |
| 6    | 3      | 3      | +       | 6     | 3       | 4       | +        | 1109.9104                  | 76.5                  | 4                          | I                      |
| 5    | 3      | 3      | +       | 5     | 3       | 2       | +        | 1109.9271                  | 70.4                  | 6                          | I                      |
| 14   | 3      | 11     | +       | 14    | 3       | 12      | +        | 1109.9356                  | 91.9                  | 2                          | I                      |
| 4    | 3      | 1      | +       | 4     | 3       | 2       | +        | 1109.9420                  | 52.6                  | -16                        | I                      |

| $N'$ | $K'_a$ | $K'_c$ | $J'^a)$ | $N''$ | $K''_a$ | $K''_c$ | $J''^b)$ | $\nu$ , exp. <sup>c)</sup> | Transm. <sup>d)</sup> | $\delta_\nu$ <sup>e)</sup> | Spectrum <sup>f)</sup> |
|------|--------|--------|---------|-------|---------|---------|----------|----------------------------|-----------------------|----------------------------|------------------------|
|      |        | 1      |         |       |         | 2       |          | 3                          | 4                     | 5                          | 6                      |
| 3    | 3      | 1      | +       | 3     | 3       | 0       | +        | 1109.9563                  | 63.2                  | 1                          | I                      |
| 3    | 2      | 2      | -       | 3     | 2       | 1       | -        | 1110.0217                  | 73.6                  | -4                         | I                      |
| 3    | 2      | 2      | +       | 3     | 2       | 1       | +        | 1110.0217                  | 73.6                  | 2                          | I                      |
| 4    | 2      | 2      | -       | 4     | 2       | 3       | -        | 1110.0402                  | 62.0                  | -2                         | I                      |
| 6    | 2      | 4      | +       | 6     | 2       | 5       | +        | 1110.0834                  | 88.6                  | 4                          | I                      |
| 6    | 2      | 4      | -       | 6     | 2       | 5       | -        | 1110.0877                  | 91.6                  | -1                         | I                      |
| 8    | 2      | 6      | +       | 8     | 2       | 7       | +        | 1110.2317                  | 92.8                  | 2                          | I                      |
| 8    | 2      | 6      | -       | 8     | 2       | 7       | -        | 1110.2409                  | 92.1                  | -1                         | I                      |
| 2    | 1      | 1      | +       | 2     | 1       | 2       | +        | 1110.2409                  | 92.1                  | 10                         | I                      |
| 26   | 4      | 22     | -       | 26    | 4       | 23      | -        | 1110.3329                  | 95.9                  | 8                          | I                      |
| 18   | 3      | 15     | +       | 18    | 3       | 16      | +        | 1110.5624                  | 96.4                  | -4                         | I                      |
| 18   | 3      | 15     | -       | 18    | 3       | 16      | -        | 1110.5830                  | 96.5                  | -2                         | I                      |
| 4    | 1      | 3      | +       | 4     | 1       | 4       | +        | 1110.5890                  | 82.4                  | -7                         | I                      |
| 36   | 5      | 31     | -       | 36    | 5       | 32      | -        | 1110.5980                  | 91.9                  | 2                          | I                      |
| 46   | 6      | 40     | +       | 46    | 6       | 41      | +        | 1110.8965                  | 79.6                  | -3                         | I                      |
| 28   | 4      | 24     | -       | 28    | 4       | 25      | -        | 1111.0615                  | 97.5                  | 3                          | I                      |
| 12   | 2      | 10     | -       | 12    | 2       | 11      | -        | 1111.0733                  | 73.5                  | 4                          | I                      |
| 56   | 7      | 49     | +       | 56    | 7       | 50      | +        | 1111.2526                  | 95.9                  | -4                         | II                     |
| 2    | 0      | 2      | +       | 1     | 0       | 1       | +        | 1111.3138                  | 6.0                   | 2                          | II                     |
| 56   | 7      | 49     | -       | 56    | 7       | 50      | -        | 1111.3169                  | 33.4                  | -1                         | II                     |
| 2    | 0      | 2      | -       | 1     | 0       | 1       | -        | 1111.3169                  | 33.4                  | -2                         | II                     |
| 2    | 1      | 1      | +       | 1     | 1       | 0       | +        | 1111.3566                  | 87.0                  | 0                          | I                      |
| 3    | 1      | 3      | -       | 2     | 1       | 2       | -        | 1111.8186                  | 79.8                  | -6                         | I                      |
| 3    | 2      | 2      | -       | 2     | 2       | 1       | -        | 1111.8467                  | 80.3                  | -14                        | I                      |
| 3    | 2      | 2      | +       | 2     | 2       | 1       | +        | 1111.8637                  | 54.0                  | -6                         | I                      |
| 8    | 1      | 7      | +       | 8     | 1       | 8       | +        | 1111.8830                  | 95.5                  | -8                         | I                      |
| 8    | 1      | 7      | -       | 8     | 1       | 8       | -        | 1111.9147                  | 85.7                  | -8                         | I                      |
| 22   | 3      | 19     | -       | 22    | 3       | 20      | -        | 1112.0848                  | 97.6                  | 4                          | I                      |
| 4    | 3      | 1      | +       | 3     | 3       | 0       | +        | 1112.3944                  | 87.8                  | 1                          | I                      |
| 4    | 2      | 2      | -       | 3     | 2       | 1       | -        | 1112.4659                  | 83.6                  | 0                          | I                      |
| 4    | 2      | 2      | +       | 3     | 2       | 1       | +        | 1112.4722                  | 78.7                  | 0                          | I                      |
| 4    | 0      | 4      | -       | 3     | 0       | 3       | -        | 1112.4976                  | 71.0                  | -28                        | I                      |
| 4    | 0      | 4      | +       | 3     | 0       | 3       | +        | 1112.4976                  | 71.0                  | 1                          | I                      |
| 4    | 1      | 3      | +       | 3     | 1       | 2       | +        | 1112.6008                  | 71.6                  | 1                          | I                      |
| 4    | 1      | 3      | -       | 3     | 1       | 2       | -        | 1112.6034                  | 76.6                  | -1                         | I                      |
| 16   | 2      | 14     | -       | 16    | 2       | 15      | -        | 1112.7323                  | 96.3                  | 3                          | I                      |
| 10   | 1      | 9      | +       | 10    | 1       | 10      | +        | 1112.8078                  | 60.0                  | 4                          | I                      |
| 10   | 1      | 9      | -       | 10    | 1       | 10      | -        | 1112.8463                  | 82.8                  | 9                          | I                      |
| 5    | 4      | 2      | -       | 4     | 4       | 1       | -        | 1112.8676                  | 90.8                  | -2                         | I                      |
| 5    | 4      | 2      | +       | 4     | 4       | 1       | +        | 1112.8889                  | 88.6                  | 0                          | I                      |
| 40   | 5      | 35     | +       | 40    | 5       | 36      | +        | 1112.9136                  | 84.9                  | 5                          | I                      |
| 5    | 1      | 5      | -       | 4     | 1       | 4       | -        | 1112.9547                  | 52.1                  | 1                          | I                      |
| 5    | 1      | 5      | +       | 4     | 1       | 4       | +        | 1112.9547                  | 52.1                  | -1                         | I                      |
| 5    | 3      | 3      | -       | 4     | 3       | 2       | -        | 1112.9763                  | 83.3                  | 0                          | I                      |
| 5    | 3      | 3      | +       | 4     | 3       | 2       | +        | 1112.9869                  | 78.6                  | 0                          | I                      |
| 5    | 2      | 4      | -       | 4     | 2       | 3       | -        | 1113.0446                  | 75.0                  | 1                          | I                      |
| 5    | 2      | 4      | +       | 4     | 2       | 3       | +        | 1113.0475                  | 70.8                  | -1                         | I                      |
| 24   | 3      | 21     | +       | 24    | 3       | 22      | +        | 1113.1196                  | 83.7                  | -17                        | I                      |
| 32   | 4      | 28     | -       | 32    | 4       | 29      | -        | 1113.2420                  | 80.7                  | 1                          | I                      |
| 6    | 5      | 1      | -       | 5     | 5       | 0       | -        | 1113.3288                  | 90.8                  | -3                         | I                      |
| 6    | 5      | 1      | +       | 5     | 5       | 0       | +        | 1113.3522                  | 76.9                  | 9                          | I                      |
| 6    | 4      | 2      | -       | 5     | 4       | 1       | -        | 1113.4651                  | 83.0                  | 0                          | I                      |
| 6    | 4      | 2      | +       | 5     | 4       | 1       | +        | 1113.4782                  | 79.8                  | -1                         | I                      |
| 6    | 3      | 3      | -       | 5     | 3       | 2       | -        | 1113.5740                  | 75.0                  | 0                          | I                      |
| 6    | 3      | 3      | +       | 5     | 3       | 2       | +        | 1113.5797                  | 71.8                  | -1                         | I                      |
| 6    | 0      | 6      | +       | 5     | 0       | 5       | +        | 1113.6455                  | 58.7                  | 2                          | I                      |
| 6    | 0      | 6      | -       | 5     | 0       | 5       | -        | 1113.6455                  | 58.7                  | -19                        | I                      |
| 6    | 2      | 4      | -       | 5     | 2       | 3       | -        | 1113.6849                  | 51.0                  | -4                         | I                      |
| 6    | 2      | 4      | +       | 5     | 2       | 3       | +        | 1113.6849                  | 51.0                  | 3                          | I                      |
| 7    | 6      | 2      | -       | 6     | 6       | 1       | -        | 1113.7589                  | 91.9                  | -1                         | I                      |
| 7    | 6      | 2      | +       | 6     | 6       | 1       | +        | 1113.7815                  | 89.3                  | -1                         | I                      |
| 6    | 1      | 5      | +       | 5     | 1       | 4       | +        | 1113.8263                  | 59.6                  | -1                         | I                      |
| 6    | 1      | 5      | -       | 5     | 1       | 4       | -        | 1113.8306                  | 66.1                  | 0                          | I                      |
| 50   | 6      | 44     | +       | 50    | 6       | 45      | +        | 1113.8537                  | 69.7                  | 1                          | I                      |
| 7    | 5      | 3      | -       | 6     | 5       | 2       | -        | 1113.9224                  | 73.8                  | 0                          | I                      |
| 7    | 5      | 3      | +       | 6     | 5       | 2       | +        | 1113.9374                  | 81.6                  | 0                          | I                      |
| 7    | 4      | 4      | -       | 6     | 4       | 3       | -        | 1114.0576                  | 76.2                  | 0                          | I                      |
| 7    | 4      | 4      | +       | 6     | 4       | 3       | +        | 1114.0661                  | 69.6                  | 1                          | I                      |
| 7    | 1      | 7      | -       | 6     | 1       | 6       | -        | 1114.0691                  | 39.6                  | -3                         | I                      |
| 7    | 1      | 7      | +       | 6     | 1       | 6       | +        | 1114.0691                  | 39.6                  | 1                          | I                      |
| 8    | 7      | 1      | -       | 7     | 7       | 0       | -        | 1114.1571                  | 92.0                  | -1                         | I                      |
| 7    | 3      | 5      | -       | 6     | 3       | 4       | -        | 1114.1647                  | 68.9                  | 1                          | I                      |

| $N'$ | $K'_a$ | $K'_c$ | $J'^a)$ | $N''$ | $K''_a$ | $K''_c$ | $J''^b)$ | $\nu$ , exp. <sup>c)</sup> | Transm. <sup>d)</sup> | $\delta_\nu$ <sup>e)</sup> | Spectrum <sup>f)</sup> |
|------|--------|--------|---------|-------|---------|---------|----------|----------------------------|-----------------------|----------------------------|------------------------|
|      |        | 1      |         |       |         | 2       |          | 3                          | 4                     | 5                          | 6                      |
| 7    | 3      | 5      | +       | 6     | 3       | 4       | +        | 1114.1677                  | 63.2                  | 0                          | I                      |
| 8    | 7      | 1      | +       | 7     | 7       | 0       | +        | 1114.1821                  | 50.7                  | 20                         | I                      |
| 7    | 2      | 6      | +       | 6     | 2       | 5       | +        | 1114.2156                  | 43.5                  | 0                          | I                      |
| 7    | 2      | 6      | -       | 6     | 2       | 5       | -        | 1114.2156                  | 43.5                  | -2                         | I                      |
| 8    | 6      | 2      | -       | 7     | 6       | 1       | -        | 1114.3485                  | 83.6                  | 0                          | I                      |
| 8    | 6      | 2      | +       | 7     | 6       | 1       | +        | 1114.3641                  | 71.3                  | -5                         | I                      |
| 26   | 3      | 23     | +       | 26    | 3       | 24      | +        | 1114.3757                  | 92.3                  | 3                          | I                      |
| 8    | 5      | 3      | -       | 7     | 5       | 2       | -        | 1114.5113                  | 77.5                  | 0                          | I                      |
| 8    | 5      | 3      | +       | 7     | 5       | 2       | +        | 1114.5216                  | 73.9                  | 0                          | I                      |
| 9    | 8      | 2      | -       | 8     | 8       | 1       | -        | 1114.5262                  | 87.9                  | 22                         | I                      |
| 9    | 8      | 2      | +       | 8     | 8       | 1       | +        | 1114.5468                  | 91.1                  | 0                          | I                      |
| 32   | 31     | 1      | -       | 31    | 31      | 0       | -        | 1114.5963                  | 80.7                  | 3                          | II                     |
| 8    | 4      | 4      | -       | 7     | 4       | 3       | -        | 1114.6466                  | 68.8                  | 0                          | I                      |
| 8    | 4      | 4      | +       | 7     | 4       | 3       | +        | 1114.6518                  | 67.5                  | -1                         | I                      |
| 9    | 7      | 3      | -       | 8     | 7       | 2       | -        | 1114.7434                  | 74.9                  | 3                          | I                      |
| 8    | 0      | 8      | +       | 7     | 0       | 7       | +        | 1114.7513                  | 40.8                  | 5                          | I                      |
| 8    | 0      | 8      | -       | 7     | 0       | 7       | -        | 1114.7513                  | 40.8                  | -7                         | I                      |
| 8    | 3      | 5      | -       | 7     | 3       | 4       | -        | 1114.7607                  | 40.0                  | 3                          | I                      |
| 9    | 7      | 3      | +       | 8     | 7       | 2       | +        | 1114.7607                  | 40.0                  | 6                          | I                      |
| 8    | 3      | 5      | +       | 7     | 3       | 4       | +        | 1114.7607                  | 40.0                  | -6                         | I                      |
| 10   | 9      | 1      | -       | 9     | 9       | 0       | -        | 1114.8594                  | 92.4                  | 1                          | I                      |
| 10   | 9      | 1      | +       | 9     | 9       | 0       | +        | 1114.8821                  | 88.7                  | 1                          | I                      |
| 8    | 2      | 6      | +       | 7     | 2       | 5       | +        | 1114.9085                  | 57.7                  | 0                          | I                      |
| 8    | 2      | 6      | -       | 7     | 2       | 5       | -        | 1114.9121                  | 61.0                  | 0                          | I                      |
| 9    | 6      | 4      | -       | 8     | 6       | 3       | -        | 1114.9339                  | 78.7                  | 0                          | I                      |
| 9    | 6      | 4      | +       | 8     | 6       | 3       | +        | 1114.9454                  | 76.9                  | -1                         | I                      |
| 8    | 1      | 7      | +       | 7     | 1       | 6       | +        | 1115.0274                  | 55.5                  | 0                          | I                      |
| 8    | 1      | 7      | -       | 7     | 1       | 6       | -        | 1115.0318                  | 59.3                  | 0                          | I                      |
| 9    | 5      | 5      | -       | 8     | 5       | 4       | -        | 1115.0966                  | 70.2                  | 0                          | I                      |
| 9    | 5      | 5      | +       | 8     | 5       | 4       | +        | 1115.1035                  | 67.3                  | 0                          | I                      |
| 10   | 8      | 2      | -       | 9     | 8       | 1       | -        | 1115.1063                  | 82.4                  | -1                         | I                      |
| 10   | 8      | 2      | +       | 9     | 8       | 1       | +        | 1115.1237                  | 84.8                  | -1                         | I                      |
| 33   | 31     | 3      | +       | 32    | 31      | 2       | +        | 1115.1410                  | 92.5                  | 0                          | II                     |
| 9    | 1      | 9      | +       | 8     | 1       | 8       | +        | 1115.1634                  | 31.5                  | 2                          | I                      |
| 11   | 10     | 2      | -       | 10    | 10      | 1       | -        | 1115.1634                  | 31.5                  | 1                          | I                      |
| 9    | 1      | 9      | -       | 8     | 1       | 8       | -        | 1115.1634                  | 31.5                  | -3                         | I                      |
| 11   | 10     | 2      | +       | 10    | 10      | 1       | +        | 1115.1858                  | 88.2                  | 0                          | I                      |
| 9    | 4      | 6      | -       | 8     | 4       | 5       | -        | 1115.2324                  | 53.1                  | 1                          | I                      |
| 9    | 4      | 6      | +       | 8     | 4       | 5       | +        | 1115.2352                  | 61.1                  | -1                         | I                      |
| 10   | 7      | 3      | -       | 9     | 7       | 2       | -        | 1115.3251                  | 79.6                  | 0                          | I                      |
| 10   | 7      | 3      | +       | 9     | 7       | 2       | +        | 1115.3391                  | 31.4                  | 13                         | I                      |
| 9    | 3      | 7      | +       | 8     | 3       | 6       | +        | 1115.3391                  | 31.4                  | -1                         | I                      |
| 9    | 3      | 7      | -       | 8     | 3       | 6       | -        | 1115.3391                  | 31.4                  | -3                         | I                      |
| 9    | 2      | 8      | -       | 8     | 2       | 7       | -        | 1115.3647                  | 44.0                  | -9                         | I                      |
| 9    | 2      | 8      | +       | 8     | 2       | 7       | +        | 1115.3647                  | 44.0                  | -1                         | I                      |
| 11   | 9      | 3      | -       | 10    | 9       | 2       | -        | 1115.4383                  | 88.0                  | -1                         | I                      |
| 11   | 9      | 3      | +       | 10    | 9       | 2       | +        | 1115.4562                  | 86.0                  | 1                          | I                      |
| 10   | 6      | 4      | -       | 9     | 6       | 3       | -        | 1115.5155                  | 73.1                  | 0                          | I                      |
| 10   | 6      | 4      | +       | 9     | 6       | 3       | +        | 1115.5239                  | 71.3                  | 0                          | I                      |
| 52   | 6      | 46     | +       | 52    | 6       | 47      | +        | 1115.5829                  | 86.8                  | 9                          | II                     |
| 52   | 6      | 46     | -       | 52    | 6       | 47      | -        | 1115.6523                  | 94.5                  | -5                         | II                     |
| 13   | 12     | 2      | -       | 12    | 12      | 1       | -        | 1115.6784                  | 64.6                  | 4                          | I                      |
| 10   | 5      | 5      | -       | 9     | 5       | 4       | -        | 1115.6784                  | 64.6                  | -1                         | I                      |
| 10   | 5      | 5      | +       | 9     | 5       | 4       | +        | 1115.6832                  | 60.1                  | 1                          | I                      |
| 11   | 8      | 4      | -       | 10    | 8       | 3       | -        | 1115.6832                  | 60.1                  | -18                        | I                      |
| 11   | 8      | 4      | +       | 10    | 8       | 3       | +        | 1115.6985                  | 78.3                  | 1                          | I                      |
| 12   | 10     | 2      | -       | 11    | 10      | 1       | -        | 1115.7391                  | 89.8                  | 0                          | I                      |
| 12   | 10     | 2      | +       | 11    | 10      | 1       | +        | 1115.7569                  | 88.6                  | -1                         | I                      |
| 10   | 0      | 10     | +       | 9     | 0       | 9       | +        | 1115.8162                  | 14.6                  | 2                          | I                      |
| 10   | 4      | 6      | -       | 9     | 4       | 5       | -        | 1115.8162                  | 14.6                  | 4                          | I                      |
| 10   | 0      | 10     | -       | 9     | 0       | 9       | -        | 1115.8162                  | 14.6                  | 4                          | I                      |
| 14   | 13     | 1      | -       | 13    | 13      | 0       | -        | 1115.8886                  | 96.0                  | -2                         | I                      |
| 27   | 26     | 2      | -       | 26    | 26      | 1       | -        | 1115.8931                  | 82.1                  | 5                          | II                     |
| 11   | 7      | 5      | -       | 10    | 7       | 4       | -        | 1115.9034                  | 75.8                  | 0                          | I                      |
| 11   | 7      | 5      | +       | 10    | 7       | 4       | +        | 1115.9128                  | 73.5                  | 0                          | I                      |
| 10   | 3      | 7      | -       | 9     | 3       | 6       | -        | 1115.9415                  | 47.4                  | -13                        | I                      |
| 10   | 3      | 7      | +       | 9     | 3       | 6       | +        | 1115.9415                  | 47.4                  | 4                          | I                      |
| 33   | 30     | 4      | -       | 32    | 30      | 3       | -        | 1115.9791                  | 94.7                  | -1                         | II                     |
| 13   | 11     | 3      | -       | 12    | 11      | 2       | -        | 1116.0086                  | 78.6                  | -2                         | I                      |
| 12   | 9      | 3      | -       | 11    | 9       | 2       | -        | 1116.0138                  | 76.2                  | 0                          | I                      |
| 12   | 9      | 3      | +       | 11    | 9       | 2       | +        | 1116.0273                  | 76.9                  | -4                         | I                      |
| 13   | 11     | 3      | +       | 12    | 11      | 2       | +        | 1116.0273                  | 76.9                  | 6                          | I                      |

| $N'$ | $K'_a$ | $K'_c$ | $J'^a)$ | $N''$ | $K''_a$ | $K''_c$ | $J''^b)$ | $\nu$ , exp. <sup>c)</sup> | Transm. <sup>d)</sup> | $\delta_\nu$ <sup>e)</sup> | Spectrum <sup>f)</sup> |
|------|--------|--------|---------|-------|---------|---------|----------|----------------------------|-----------------------|----------------------------|------------------------|
|      |        | 1      |         |       |         | 2       |          | 3                          | 4                     | 5                          | 6                      |
| 26   | 25     | 1      | —       | 25    | 25      | 0       | —        | 1116.0688                  | 62.5                  | 9                          | II                     |
| 15   | 14     | 2      | —       | 14    | 14      | 1       | —        | 1116.0690                  | 96.4                  | 0                          | I                      |
| 26   | 25     | 1      | +       | 25    | 25      | 0       | +        | 1116.0812                  | 95.9                  | -2                         | II                     |
| 11   | 6      | 6      | —       | 10    | 6       | 5       | —        | 1116.0939                  | 68.9                  | 0                          | I                      |
| 11   | 6      | 6      | +       | 10    | 6       | 5       | +        | 1116.0998                  | 67.8                  | -1                         | I                      |
| 10   | 2      | 8      | +       | 9     | 2       | 7       | +        | 1116.1383                  | 52.9                  | 0                          | I                      |
| 10   | 2      | 8      | —       | 9     | 2       | 7       | —        | 1116.1435                  | 55.7                  | 0                          | I                      |
| 10   | 1      | 9      | +       | 9     | 1       | 8       | +        | 1116.1980                  | 51.0                  | 0                          | I                      |
| 10   | 1      | 9      | —       | 9     | 1       | 8       | —        | 1116.2022                  | 53.1                  | -1                         | I                      |
| 25   | 24     | 2      | —       | 24    | 24      | 1       | —        | 1116.2144                  | 13.7                  | -2                         | II                     |
| 11   | 1      | 11     | +       | 10    | 1       | 10      | +        | 1116.2375                  | 25.0                  | 1                          | I                      |
| 29   | 27     | 3      | +       | 28    | 27      | 2       | +        | 1116.2375                  | 25.0                  | 17                         | I                      |
| 16   | 15     | 1      | +       | 15    | 15      | 0       | +        | 1116.2375                  | 25.0                  | -9                         | I                      |
| 11   | 1      | 11     | —       | 10    | 1       | 10      | —        | 1116.2375                  | 25.0                  | -3                         | I                      |
| 14   | 12     | 2      | —       | 13    | 12      | 1       | —        | 1116.2476                  | 90.9                  | 1                          | I                      |
| 11   | 5      | 7      | —       | 10    | 5       | 6       | —        | 1116.2576                  | 60.3                  | 2                          | I                      |
| 11   | 5      | 7      | +       | 10    | 5       | 6       | +        | 1116.2601                  | 44.9                  | -1                         | I                      |
| 12   | 8      | 4      | —       | 11    | 8       | 3       | —        | 1116.2601                  | 44.9                  | 1                          | I                      |
| 12   | 8      | 4      | +       | 11    | 8       | 3       | +        | 1116.2697                  | 59.2                  | -6                         | I                      |
| 13   | 10     | 4      | —       | 12    | 10      | 3       | —        | 1116.3113                  | 85.3                  | 0                          | I                      |
| 13   | 10     | 4      | +       | 12    | 10      | 3       | +        | 1116.3255                  | 84.4                  | 0                          | I                      |
| 24   | 23     | 1      | —       | 23    | 23      | 0       | —        | 1116.3333                  | 30.7                  | 6                          | II                     |
| 17   | 16     | 2      | —       | 16    | 16      | 1       | —        | 1116.3370                  | 89.9                  | -4                         | I                      |
| 24   | 23     | 1      | +       | 23    | 23      | 0       | +        | 1116.3478                  | 21.8                  | 4                          | II                     |
| 11   | 4      | 8      | +       | 10    | 4       | 7       | +        | 1116.3953                  | 33.1                  | -2                         | I                      |
| 11   | 4      | 8      | —       | 10    | 4       | 7       | —        | 1116.3953                  | 33.1                  | 0                          | I                      |
| 23   | 22     | 2      | —       | 22    | 22      | 1       | —        | 1116.4220                  | 80.8                  | 2                          | II                     |
| 23   | 22     | 2      | +       | 22    | 22      | 1       | +        | 1116.4372                  | 97.6                  | 1                          | I                      |
| 18   | 17     | 1      | +       | 17    | 17      | 0       | +        | 1116.4448                  | 77.3                  | -1                         | II                     |
| 15   | 13     | 3      | —       | 14    | 13      | 2       | —        | 1116.4554                  | 93.2                  | 0                          | I                      |
| 15   | 13     | 3      | +       | 14    | 13      | 2       | +        | 1116.4726                  | 82.8                  | -2                         | I                      |
| 12   | 7      | 5      | —       | 11    | 7       | 4       | —        | 1116.4782                  | 68.3                  | -1                         | I                      |
| 19   | 18     | 2      | —       | 18    | 18      | 1       | —        | 1116.4853                  | 68.1                  | 5                          | I                      |
| 12   | 7      | 5      | +       | 11    | 7       | 4       | +        | 1116.4853                  | 68.1                  | 0                          | I                      |
| 11   | 2      | 10     | +       | 10    | 2       | 9       | +        | 1116.4915                  | 41.6                  | -3                         | I                      |
| 11   | 2      | 10     | —       | 10    | 2       | 9       | —        | 1116.4915                  | 41.6                  | -16                        | I                      |
| 11   | 3      | 9      | —       | 10    | 3       | 8       | —        | 1116.4995                  | 44.3                  | -14                        | I                      |
| 11   | 3      | 9      | +       | 10    | 3       | 8       | +        | 1116.4995                  | 44.3                  | 3                          | I                      |
| 20   | 19     | 1      | —       | 19    | 19      | 0       | —        | 1116.5129                  | 82.9                  | -6                         | II                     |
| 20   | 19     | 1      | +       | 19    | 19      | 0       | +        | 1116.5307                  | 86.9                  | -2                         | II                     |
| 14   | 11     | 3      | —       | 13    | 11      | 2       | —        | 1116.5784                  | 70.6                  | 5                          | I                      |
| 13   | 9      | 5      | —       | 12    | 9       | 4       | —        | 1116.5856                  | 79.0                  | 0                          | I                      |
| 14   | 11     | 3      | +       | 13    | 11      | 2       | +        | 1116.5923                  | 86.5                  | 0                          | I                      |
| 13   | 9      | 5      | +       | 12    | 9       | 4       | +        | 1116.5964                  | 78.6                  | -1                         | I                      |
| 27   | 25     | 3      | —       | 26    | 25      | 2       | —        | 1116.6057                  | 96.7                  | -14                        | II                     |
| 16   | 14     | 2      | —       | 15    | 14      | 1       | —        | 1116.6326                  | 94.5                  | 0                          | I                      |
| 16   | 14     | 2      | +       | 15    | 14      | 1       | +        | 1116.6495                  | 94.6                  | -2                         | I                      |
| 12   | 6      | 6      | —       | 11    | 6       | 5       | —        | 1116.6691                  | 65.0                  | 0                          | I                      |
| 12   | 6      | 6      | +       | 11    | 6       | 5       | +        | 1116.6730                  | 64.1                  | -1                         | I                      |
| 26   | 24     | 2      | —       | 25    | 24      | 1       | —        | 1116.7568                  | 6.4                   | 14                         | II                     |
| 26   | 24     | 2      | +       | 25    | 24      | 1       | +        | 1116.7675                  | 94.6                  | 0                          | II                     |
| 17   | 15     | 3      | —       | 16    | 15      | 2       | —        | 1116.7790                  | 96.3                  | -3                         | I                      |
| 17   | 15     | 3      | +       | 16    | 15      | 2       | +        | 1116.7962                  | 89.5                  | 2                          | I                      |
| 15   | 12     | 4      | —       | 14    | 12      | 3       | —        | 1116.8135                  | 89.2                  | 0                          | I                      |
| 15   | 12     | 4      | +       | 14    | 12      | 3       | +        | 1116.8287                  | 71.4                  | 7                          | I                      |
| 12   | 5      | 7      | —       | 11    | 5       | 6       | —        | 1116.8340                  | 43.5                  | 7                          | I                      |
| 13   | 8      | 6      | —       | 12    | 8       | 5       | —        | 1116.8340                  | 43.5                  | 24                         | I                      |
| 12   | 5      | 7      | +       | 11    | 5       | 6       | +        | 1116.8340                  | 43.5                  | -8                         | I                      |
| 13   | 8      | 6      | +       | 12    | 8       | 5       | +        | 1116.8394                  | 68.6                  | -1                         | I                      |
| 12   | 0      | 12     | —       | 11    | 0       | 11      | —        | 1116.8517                  | 24.4                  | 6                          | I                      |
| 12   | 0      | 12     | +       | 11    | 0       | 11      | +        | 1116.8517                  | 24.4                  | -1                         | I                      |
| 14   | 10     | 4      | —       | 13    | 10      | 3       | —        | 1116.8801                  | 81.5                  | 1                          | I                      |
| 14   | 10     | 4      | +       | 13    | 10      | 3       | +        | 1116.8909                  | 75.3                  | -4                         | I                      |
| 18   | 16     | 2      | —       | 17    | 16      | 1       | —        | 1116.8954                  | 88.6                  | -2                         | I                      |
| 18   | 16     | 2      | +       | 17    | 16      | 1       | +        | 1116.9125                  | 73.8                  | 6                          | I                      |
| 24   | 22     | 2      | —       | 23    | 22      | 1       | —        | 1116.9651                  | 63.8                  | -9                         | II                     |
| 29   | 26     | 4      | —       | 28    | 26      | 3       | —        | 1116.9651                  | 63.8                  | -5                         | II                     |
| 12   | 4      | 8      | —       | 11    | 4       | 7       | —        | 1116.9750                  | 37.1                  | -5                         | I                      |
| 12   | 4      | 8      | +       | 11    | 4       | 7       | +        | 1116.9750                  | 37.1                  | 3                          | I                      |
| 19   | 17     | 3      | —       | 18    | 17      | 2       | —        | 1116.9814                  | 64.8                  | -3                         | II                     |
| 19   | 17     | 3      | +       | 18    | 17      | 2       | +        | 1116.9984                  | 38.7                  | 9                          | II                     |
| 16   | 13     | 3      | —       | 15    | 13      | 2       | —        | 1117.0184                  | 91.6                  | -1                         | I                      |

| $N'$ | $K'_a$ | $K'_c$ | $J'^a)$ | $N''$ | $K''_a$ | $K''_c$ | $J''^b)$ | $\nu$ , exp. <sup>c)</sup> | Transm. <sup>d)</sup> | $\delta_\nu$ <sup>e)</sup> | Spectrum <sup>f)</sup> |
|------|--------|--------|---------|-------|---------|---------|----------|----------------------------|-----------------------|----------------------------|------------------------|
|      |        | 1      |         |       |         | 2       |          | 3                          | 4                     | 5                          | 6                      |
| 23   | 21     | 3      | —       | 22    | 21      | 2       | —        | 1117.0284                  | 88.3                  | 4                          | I                      |
| 16   | 13     | 3      | +       | 15    | 13      | 2       | +        | 1117.0324                  | 87.7                  | -5                         | I                      |
| 20   | 18     | 2      | —       | 19    | 18      | 1       | —        | 1117.0378                  | 70.4                  | 0                          | II                     |
| 13   | 7      | 7      | —       | 12    | 7       | 6       | —        | 1117.0500                  | 68.6                  | 0                          | I                      |
| 13   | 7      | 7      | +       | 12    | 7       | 6       | +        | 1117.0549                  | 66.5                  | -1                         | I                      |
| 20   | 18     | 2      | +       | 19    | 18      | 1       | +        | 1117.0549                  | 66.5                  | 18                         | I                      |
| 22   | 20     | 2      | —       | 21    | 20      | 1       | —        | 1117.0607                  | 69.9                  | -1                         | II                     |
| 22   | 20     | 2      | +       | 21    | 20      | 1       | +        | 1117.0731                  | 8.0                   | -19                        | II                     |
| 21   | 19     | 3      | +       | 20    | 19      | 2       | +        | 1117.0795                  | 88.9                  | 6                          | I                      |
| 12   | 3      | 9      | +       | 11    | 3       | 8       | +        | 1117.1235                  | 50.4                  | -1                         | I                      |
| 12   | 3      | 9      | —       | 11    | 3       | 8       | —        | 1117.1270                  | 53.3                  | -1                         | I                      |
| 28   | 25     | 3      | —       | 27    | 25      | 2       | —        | 1117.1434                  | 85.2                  | 1                          | I                      |
| 15   | 11     | 5      | —       | 14    | 11      | 4       | —        | 1117.1434                  | 85.2                  | 0                          | I                      |
| 14   | 9      | 5      | —       | 13    | 9       | 4       | —        | 1117.1542                  | 68.6                  | 3                          | I                      |
| 15   | 11     | 5      | +       | 14    | 11      | 4       | +        | 1117.1542                  | 68.6                  | -9                         | I                      |
| 14   | 9      | 5      | +       | 13    | 9       | 4       | +        | 1117.1622                  | 70.7                  | -2                         | I                      |
| 17   | 14     | 4      | —       | 16    | 14      | 3       | —        | 1117.1928                  | 92.6                  | -1                         | I                      |
| 17   | 14     | 4      | +       | 16    | 14      | 3       | +        | 1117.2069                  | 90.6                  | -1                         | I                      |
| 13   | 6      | 8      | —       | 12    | 6       | 7       | —        | 1117.2433                  | 51.0                  | 21                         | I                      |
| 13   | 6      | 8      | +       | 12    | 6       | 7       | +        | 1117.2433                  | 51.0                  | -4                         | I                      |
| 27   | 24     | 4      | —       | 26    | 24      | 3       | —        | 1117.2923                  | 22.9                  | 0                          | I                      |
| 13   | 1      | 13     | —       | 12    | 1       | 12      | —        | 1117.2923                  | 22.9                  | -2                         | I                      |
| 13   | 1      | 13     | +       | 12    | 1       | 12      | +        | 1117.2923                  | 22.9                  | 1                          | I                      |
| 27   | 24     | 4      | +       | 26    | 24      | 3       | +        | 1117.3035                  | 88.7                  | 3                          | II                     |
| 12   | 1      | 11     | +       | 11    | 1       | 10      | +        | 1117.3314                  | 43.0                  | 0                          | I                      |
| 12   | 1      | 11     | —       | 11    | 1       | 10      | —        | 1117.3351                  | 43.3                  | 0                          | I                      |
| 18   | 15     | 3      | +       | 17    | 15      | 2       | +        | 1117.3507                  | 39.3                  | 0                          | II                     |
| 12   | 2      | 10     | +       | 11    | 2       | 9       | +        | 1117.3606                  | 44.5                  | -1                         | I                      |
| 12   | 2      | 10     | —       | 11    | 2       | 9       | —        | 1117.3666                  | 50.9                  | 0                          | I                      |
| 16   | 12     | 4      | —       | 15    | 12      | 3       | —        | 1117.3765                  | 83.7                  | 4                          | I                      |
| 16   | 12     | 4      | +       | 15    | 12      | 3       | +        | 1117.3879                  | 85.0                  | 0                          | I                      |
| 14   | 8      | 6      | —       | 13    | 8       | 5       | —        | 1117.4000                  | 70.8                  | 0                          | I                      |
| 13   | 5      | 9      | —       | 12    | 5       | 8       | —        | 1117.4065                  | 29.0                  | 0                          | I                      |
| 13   | 5      | 9      | +       | 12    | 5       | 8       | +        | 1117.4065                  | 29.0                  | -4                         | I                      |
| 14   | 8      | 6      | +       | 13    | 8       | 5       | +        | 1117.4065                  | 29.0                  | 7                          | I                      |
| 15   | 10     | 6      | —       | 14    | 10      | 5       | —        | 1117.4453                  | 80.4                  | 0                          | I                      |
| 19   | 16     | 4      | —       | 18    | 16      | 3       | —        | 1117.4505                  | 41.9                  | 1                          | II                     |
| 15   | 10     | 6      | +       | 14    | 10      | 5       | +        | 1117.4542                  | 78.2                  | 0                          | I                      |
| 19   | 16     | 4      | +       | 18    | 16      | 3       | +        | 1117.4640                  | 50.0                  | 0                          | II                     |
| 30   | 26     | 4      | —       | 29    | 26      | 3       | —        | 1117.4974                  | 94.9                  | -2                         | II                     |
| 25   | 22     | 4      | —       | 24    | 22      | 3       | —        | 1117.5075                  | 25.5                  | 4                          | II                     |
| 25   | 22     | 4      | +       | 24    | 22      | 3       | +        | 1117.5190                  | 26.6                  | 8                          | II                     |
| 20   | 17     | 3      | —       | 19    | 17      | 2       | —        | 1117.5337                  | 59.1                  | -1                         | II                     |
| 20   | 17     | 3      | +       | 19    | 17      | 2       | +        | 1117.5470                  | 40.8                  | -2                         | I                      |
| 13   | 4      | 10     | —       | 12    | 4       | 9       | —        | 1117.5470                  | 40.8                  | -9                         | I                      |
| 13   | 4      | 10     | +       | 12    | 4       | 9       | +        | 1117.5470                  | 40.8                  | 6                          | I                      |
| 17   | 13     | 5      | —       | 16    | 13      | 4       | —        | 1117.5782                  | 89.0                  | 0                          | I                      |
| 24   | 21     | 3      | +       | 23    | 21      | 2       | +        | 1117.5830                  | 12.0                  | 4                          | II                     |
| 17   | 13     | 5      | +       | 16    | 13      | 4       | +        | 1117.5898                  | 77.0                  | -1                         | I                      |
| 13   | 2      | 12     | +       | 12    | 2       | 11      | +        | 1117.5954                  | 41.4                  | 2                          | I                      |
| 13   | 2      | 12     | —       | 12    | 2       | 11      | —        | 1117.5954                  | 41.4                  | -17                        | I                      |
| 22   | 19     | 3      | —       | 21    | 19      | 2       | —        | 1117.6095                  | 25.1                  | -19                        | II                     |
| 14   | 7      | 7      | —       | 13    | 7       | 6       | —        | 1117.6185                  | 65.6                  | 0                          | I                      |
| 23   | 20     | 4      | +       | 22    | 20      | 3       | +        | 1117.6185                  | 65.6                  | 5                          | I                      |
| 14   | 7      | 7      | +       | 13    | 7       | 6       | +        | 1117.6219                  | 63.7                  | -1                         | I                      |
| 22   | 19     | 3      | +       | 21    | 19      | 2       | +        | 1117.6219                  | 63.7                  | -23                        | I                      |
| 13   | 3      | 11     | +       | 12    | 3       | 10      | +        | 1117.6449                  | 47.8                  | 0                          | I                      |
| 13   | 3      | 11     | —       | 12    | 3       | 10      | —        | 1117.6473                  | 50.0                  | -1                         | I                      |
| 29   | 25     | 5      | —       | 28    | 25      | 4       | —        | 1117.6757                  | 90.0                  | -8                         | II                     |
| 29   | 25     | 5      | +       | 28    | 25      | 4       | +        | 1117.6850                  | 83.0                  | 2                          | II                     |
| 16   | 11     | 5      | —       | 15    | 11      | 4       | —        | 1117.7057                  | 82.5                  | 0                          | I                      |
| 16   | 11     | 5      | +       | 15    | 11      | 4       | +        | 1117.7150                  | 81.0                  | 0                          | I                      |
| 15   | 9      | 7      | —       | 14    | 9       | 6       | —        | 1117.7186                  | 66.0                  | -4                         | I                      |
| 15   | 9      | 7      | +       | 14    | 9       | 6       | +        | 1117.7255                  | 62.1                  | -1                         | I                      |
| 18   | 14     | 4      | +       | 17    | 14      | 3       | +        | 1117.7621                  | 78.7                  | 7                          | I                      |
| 24   | 2      | 22     | —       | 24    | 2       | 23      | —        | 1117.7796                  | 92.7                  | -10                        | I                      |
| 14   | 6      | 8      | —       | 13    | 6       | 7       | —        | 1117.8109                  | 45.5                  | 7                          | I                      |
| 14   | 6      | 8      | +       | 13    | 6       | 7       | +        | 1117.8109                  | 45.5                  | -7                         | I                      |
| 28   | 24     | 4      | —       | 27    | 24      | 3       | —        | 1117.8274                  | 89.4                  | -1                         | II                     |
| 35   | 29     | 7      | —       | 34    | 29      | 6       | —        | 1117.8485                  | 96.9                  | 3                          | II                     |
| 35   | 29     | 7      | +       | 34    | 29      | 6       | +        | 1117.8528                  | 97.2                  | -1                         | II                     |
| 14   | 0      | 14     | +       | 13    | 0       | 13      | +        | 1117.8695                  | 22.2                  | -2                         | I                      |

| $N'$ | $K'_a$ | $K'_c$ | $J'^a)$ | $N''$ | $K''_a$ | $K''_c$ | $J''^b)$ | $\nu$ , exp. <sup>c)</sup> | Transm. <sup>d)</sup> | $\delta_\nu$ <sup>e)</sup> | Spectrum <sup>f)</sup> |
|------|--------|--------|---------|-------|---------|---------|----------|----------------------------|-----------------------|----------------------------|------------------------|
|      |        | 1      |         |       |         | 2       |          | 3                          | 4                     | 5                          | 6                      |
| 14   | 0      | 14     | —       | 13    | 0       | 13      | —        | 1117.8695                  | 22.2                  | 1                          | I                      |
| 19   | 15     | 5      | —       | 18    | 15      | 4       | —        | 1117.8907                  | 35.6                  | -1                         | II                     |
| 19   | 15     | 5      | +       | 18    | 15      | 4       | +        | 1117.9024                  | 31.3                  | 0                          | II                     |
| 17   | 12     | 6      | —       | 16    | 12      | 5       | —        | 1117.9353                  | 84.2                  | -1                         | I                      |
| 17   | 12     | 6      | +       | 16    | 12      | 5       | +        | 1117.9448                  | 83.5                  | -1                         | I                      |
| 27   | 23     | 5      | —       | 26    | 23      | 4       | —        | 1117.9511                  | 86.3                  | 7                          | II                     |
| 27   | 23     | 5      | +       | 26    | 23      | 4       | +        | 1117.9597                  | 85.9                  | 2                          | II                     |
| 15   | 8      | 8      | —       | 14    | 8       | 7       | —        | 1117.9649                  | 65.5                  | -1                         | I                      |
| 15   | 8      | 8      | +       | 14    | 8       | 7       | +        | 1117.9693                  | 66.6                  | -1                         | I                      |
| 14   | 5      | 9      | —       | 13    | 5       | 8       | —        | 1117.9771                  | 34.0                  | -2                         | I                      |
| 14   | 5      | 9      | +       | 13    | 5       | 8       | +        | 1117.9771                  | 34.0                  | 3                          | I                      |
| 20   | 16     | 4      | —       | 19    | 16      | 3       | —        | 1118.0018                  | 37.7                  | 0                          | II                     |
| 16   | 10     | 6      | —       | 15    | 10      | 5       | —        | 1118.0072                  | 77.2                  | 0                          | I                      |
| 16   | 10     | 6      | +       | 15    | 10      | 5       | +        | 1118.0140                  | 75.0                  | -2                         | I                      |
| 20   | 16     | 4      | +       | 19    | 16      | 3       | +        | 1118.0140                  | 75.0                  | 8                          | I                      |
| 31   | 26     | 6      | —       | 30    | 26      | 5       | —        | 1118.0266                  | 94.2                  | 0                          | II                     |
| 31   | 26     | 6      | +       | 30    | 26      | 5       | +        | 1118.0328                  | 77.3                  | -4                         | II                     |
| 26   | 22     | 4      | —       | 25    | 22      | 3       | —        | 1118.0446                  | 59.9                  | -3                         | II                     |
| 26   | 22     | 4      | +       | 25    | 22      | 3       | +        | 1118.0545                  | 87.3                  | 1                          | II                     |
| 21   | 17     | 5      | —       | 20    | 17      | 4       | —        | 1118.0826                  | 91.5                  | -1                         | I                      |
| 21   | 17     | 5      | +       | 20    | 17      | 4       | +        | 1118.0938                  | 88.1                  | -1                         | I                      |
| 25   | 21     | 5      | +       | 24    | 21      | 4       | +        | 1118.1208                  | 74.6                  | 1                          | II                     |
| 14   | 4      | 10     | +       | 13    | 4       | 9       | +        | 1118.1256                  | 48.3                  | 1                          | I                      |
| 14   | 4      | 10     | —       | 13    | 4       | 9       | —        | 1118.1276                  | 50.6                  | -2                         | I                      |
| 18   | 13     | 5      | —       | 17    | 13      | 4       | —        | 1118.1343                  | 85.1                  | -2                         | I                      |
| 22   | 18     | 4      | —       | 21    | 18      | 3       | —        | 1118.1343                  | 85.1                  | 4                          | I                      |
| 18   | 13     | 5      | +       | 17    | 13      | 4       | +        | 1118.1442                  | 82.2                  | 1                          | I                      |
| 22   | 18     | 4      | +       | 21    | 18      | 3       | +        | 1118.1442                  | 82.2                  | -6                         | I                      |
| 24   | 20     | 4      | —       | 23    | 20      | 3       | —        | 1118.1479                  | 34.1                  | 2                          | II                     |
| 23   | 19     | 5      | —       | 22    | 19      | 4       | —        | 1118.1552                  | 55.2                  | -3                         | II                     |
| 24   | 20     | 4      | +       | 23    | 20      | 3       | +        | 1118.1578                  | 69.6                  | -2                         | II                     |
| 15   | 7      | 9      | —       | 14    | 7       | 8       | —        | 1118.1842                  | 58.4                  | 3                          | I                      |
| 15   | 7      | 9      | +       | 14    | 7       | 8       | +        | 1118.1859                  | 58.9                  | -2                         | I                      |
| 30   | 25     | 5      | —       | 29    | 25      | 4       | —        | 1118.2066                  | 94.7                  | 1                          | II                     |
| 30   | 25     | 5      | +       | 29    | 25      | 4       | +        | 1118.2137                  | 93.7                  | 2                          | II                     |
| 17   | 11     | 7      | —       | 16    | 11      | 6       | —        | 1118.2646                  | 80.8                  | 0                          | I                      |
| 17   | 11     | 7      | +       | 16    | 11      | 6       | +        | 1118.2719                  | 77.1                  | -1                         | I                      |
| 16   | 9      | 7      | —       | 15    | 9       | 6       | —        | 1118.2809                  | 69.0                  | 0                          | I                      |
| 16   | 9      | 7      | +       | 15    | 9       | 6       | +        | 1118.2857                  | 71.3                  | 0                          | I                      |
| 19   | 14     | 6      | —       | 18    | 14      | 5       | —        | 1118.3031                  | 88.3                  | -1                         | I                      |
| 19   | 14     | 6      | +       | 18    | 14      | 5       | +        | 1118.3133                  | 44.4                  | 5                          | I                      |
| 14   | 3      | 11     | +       | 13    | 3       | 10      | +        | 1118.3133                  | 44.4                  | -1                         | I                      |
| 14   | 3      | 11     | —       | 13    | 3       | 10      | —        | 1118.3184                  | 49.1                  | 0                          | I                      |
| 15   | 1      | 15     | —       | 14    | 1       | 14      | —        | 1118.3290                  | 22.2                  | -1                         | I                      |
| 15   | 1      | 15     | +       | 14    | 1       | 14      | +        | 1118.3290                  | 22.2                  | 0                          | I                      |
| 33   | 27     | 7      | +       | 32    | 27      | 6       | +        | 1118.3494                  | 94.8                  | -1                         | II                     |
| 29   | 24     | 6      | —       | 28    | 24      | 5       | —        | 1118.3592                  | 92.0                  | 2                          | II                     |
| 29   | 24     | 6      | +       | 28    | 24      | 5       | +        | 1118.3665                  | 89.5                  | 2                          | II                     |
| 15   | 6      | 10     | —       | 14    | 6       | 9       | —        | 1118.3767                  | 37.3                  | 2                          | I                      |
| 15   | 6      | 10     | +       | 14    | 6       | 9       | +        | 1118.3767                  | 37.3                  | -2                         | I                      |
| 14   | 1      | 13     | +       | 13    | 1       | 12      | +        | 1118.4213                  | 43.4                  | 0                          | I                      |
| 14   | 1      | 13     | —       | 13    | 1       | 12      | —        | 1118.4238                  | 45.6                  | 0                          | I                      |
| 20   | 15     | 5      | —       | 19    | 15      | 4       | —        | 1118.4414                  | 91.6                  | -2                         | I                      |
| 20   | 15     | 5      | +       | 19    | 15      | 4       | +        | 1118.4512                  | 91.7                  | 0                          | I                      |
| 28   | 23     | 5      | —       | 27    | 23      | 4       | —        | 1118.4831                  | 83.6                  | -3                         | II                     |
| 18   | 12     | 6      | —       | 17    | 12      | 5       | —        | 1118.4913                  | 83.6                  | 0                          | I                      |
| 18   | 12     | 6      | +       | 17    | 12      | 5       | +        | 1118.4989                  | 83.3                  | 0                          | I                      |
| 16   | 8      | 8      | —       | 15    | 8       | 7       | —        | 1118.5271                  | 66.0                  | 1                          | I                      |
| 16   | 8      | 8      | +       | 15    | 8       | 7       | +        | 1118.5299                  | 64.5                  | -1                         | I                      |
| 15   | 5      | 11     | +       | 14    | 5       | 10      | +        | 1118.5442                  | 39.4                  | 5                          | I                      |
| 15   | 5      | 11     | —       | 14    | 5       | 10      | —        | 1118.5442                  | 39.4                  | -7                         | I                      |
| 21   | 16     | 6      | —       | 20    | 16      | 5       | —        | 1118.5497                  | 91.4                  | -2                         | I                      |
| 21   | 16     | 6      | +       | 20    | 16      | 5       | +        | 1118.5607                  | 43.3                  | 13                         | I                      |
| 14   | 2      | 12     | +       | 13    | 2       | 11      | +        | 1118.5607                  | 43.3                  | -1                         | I                      |
| 14   | 2      | 12     | —       | 13    | 2       | 11      | —        | 1118.5666                  | 40.5                  | -3                         | I                      |
| 17   | 10     | 8      | —       | 16    | 10      | 7       | —        | 1118.5666                  | 40.5                  | 8                          | I                      |
| 17   | 10     | 8      | +       | 16    | 10      | 7       | +        | 1118.5712                  | 73.3                  | -1                         | I                      |
| 27   | 22     | 6      | —       | 26    | 22      | 5       | —        | 1118.5800                  | 74.4                  | 3                          | II                     |
| 27   | 22     | 6      | +       | 26    | 22      | 5       | +        | 1118.5879                  | 9.6                   | 3                          | II                     |
| 22   | 17     | 5      | —       | 21    | 17      | 4       | —        | 1118.6292                  | 89.7                  | 9                          | II                     |
| 22   | 17     | 5      | +       | 21    | 17      | 4       | +        | 1118.6373                  | 75.8                  | -4                         | I                      |
| 26   | 21     | 5      | —       | 25    | 21      | 4       | —        | 1118.6472                  | 75.8                  | -2                         | II                     |



| $N'$ | $K'_a$ | $K'_c$ | $J'^a)$ | $N''$ | $K''_a$ | $K''_c$ | $J''^b)$ | $\nu$ , exp. <sup>c)</sup> | Transm. <sup>d)</sup> | $\delta_\nu$ <sup>e)</sup> | Spectrum <sup>f)</sup> |
|------|--------|--------|---------|-------|---------|---------|----------|----------------------------|-----------------------|----------------------------|------------------------|
|      |        | 1      |         |       |         | 2       |          | 3                          | 4                     | 5                          | 6                      |
| 26   | 21     | 5      | +       | 25    | 21      | 4       | +        | 1118.6557                  | 77.1                  | 1                          | II                     |
| 23   | 18     | 6      | -       | 22    | 18      | 5       | -        | 1118.6753                  | 37.9                  | -18                        | I                      |
| 15   | 2      | 14     | +       | 14    | 2       | 13      | +        | 1118.6753                  | 37.9                  | 3                          | I                      |
| 15   | 2      | 14     | -       | 14    | 2       | 13      | -        | 1118.6753                  | 37.9                  | -15                        | I                      |
| 25   | 20     | 6      | -       | 24    | 20      | 5       | -        | 1118.6874                  | 39.3                  | 10                         | I                      |
| 19   | 13     | 7      | -       | 18    | 13      | 6       | -        | 1118.6874                  | 39.3                  | -1                         | I                      |
| 15   | 4      | 12     | +       | 14    | 4       | 11      | +        | 1118.6874                  | 39.3                  | 1                          | I                      |
| 23   | 18     | 6      | +       | 22    | 18      | 5       | +        | 1118.6874                  | 39.3                  | 13                         | I                      |
| 15   | 4      | 12     | -       | 14    | 4       | 11      | -        | 1118.6897                  | 43.6                  | -3                         | I                      |
| 19   | 13     | 7      | +       | 18    | 13      | 6       | +        | 1118.6953                  | 5.0                   | 0                          | II                     |
| 25   | 20     | 6      | +       | 24    | 20      | 5       | +        | 1118.6953                  | 5.0                   | 3                          | II                     |
| 24   | 19     | 5      | -       | 23    | 19      | 4       | -        | 1118.6953                  | 5.0                   | -11                        | II                     |
| 24   | 19     | 5      | +       | 23    | 19      | 4       | +        | 1118.7053                  | 66.3                  | 1                          | II                     |
| 31   | 25     | 7      | -       | 30    | 25      | 6       | -        | 1118.7332                  | 71.9                  | -5                         | II                     |
| 20   | 1      | 19     | +       | 20    | 1       | 20      | +        | 1118.7333                  | 97.1                  | 4                          | I                      |
| 31   | 25     | 7      | +       | 30    | 25      | 6       | +        | 1118.7394                  | 88.5                  | 1                          | II                     |
| 16   | 7      | 9      | +       | 15    | 7       | 8       | +        | 1118.7471                  | 42.5                  | -5                         | I                      |
| 16   | 7      | 9      | -       | 15    | 7       | 8       | -        | 1118.7471                  | 42.5                  | 8                          | I                      |
| 15   | 3      | 13     | +       | 14    | 3       | 12      | +        | 1118.7733                  | 45.7                  | 8                          | I                      |
| 15   | 3      | 13     | -       | 14    | 3       | 12      | -        | 1118.7764                  | 48.3                  | 0                          | I                      |
| 18   | 11     | 7      | -       | 17    | 11      | 6       | -        | 1118.8202                  | 79.2                  | 0                          | I                      |
| 18   | 11     | 7      | +       | 17    | 11      | 6       | +        | 1118.8259                  | 78.4                  | 0                          | I                      |
| 17   | 9      | 9      | -       | 16    | 9       | 8       | -        | 1118.8395                  | 71.3                  | 0                          | I                      |
| 17   | 9      | 9      | +       | 16    | 9       | 8       | +        | 1118.8430                  | 69.7                  | -1                         | I                      |
| 20   | 14     | 6      | -       | 19    | 14      | 5       | -        | 1118.8534                  | 88.2                  | 0                          | I                      |
| 20   | 14     | 6      | +       | 19    | 14      | 5       | +        | 1118.8609                  | 84.9                  | -4                         | I                      |
| 16   | 0      | 16     | +       | 15    | 0       | 15      | +        | 1118.8764                  | 21.2                  | -2                         | I                      |
| 16   | 0      | 16     | -       | 15    | 0       | 15      | -        | 1118.8764                  | 21.2                  | 1                          | I                      |
| 30   | 24     | 6      | -       | 29    | 24      | 5       | -        | 1118.8873                  | 90.0                  | -1                         | II                     |
| 16   | 6      | 10     | -       | 15    | 6       | 9       | -        | 1118.9398                  | 36.4                  | -2                         | I                      |
| 16   | 6      | 10     | +       | 15    | 6       | 9       | +        | 1118.9398                  | 36.4                  | 1                          | I                      |
| 21   | 15     | 7      | -       | 20    | 15      | 6       | -        | 1118.9889                  | 83.6                  | -2                         | I                      |
| 21   | 15     | 7      | +       | 20    | 15      | 6       | +        | 1118.9969                  | 91.0                  | 0                          | I                      |
| 29   | 23     | 7      | -       | 28    | 23      | 6       | -        | 1119.0135                  | 89.7                  | 1                          | II                     |
| 29   | 23     | 7      | +       | 28    | 23      | 6       | +        | 1119.0197                  | 88.0                  | 1                          | II                     |
| 19   | 12     | 8      | -       | 18    | 12      | 7       | -        | 1119.0439                  | 82.2                  | 0                          | I                      |
| 19   | 12     | 8      | +       | 18    | 12      | 7       | +        | 1119.0499                  | 77.1                  | -1                         | I                      |
| 33   | 26     | 8      | +       | 32    | 26      | 7       | +        | 1119.0801                  | 91.3                  | 2                          | II                     |
| 17   | 8      | 10     | -       | 16    | 8       | 9       | -        | 1119.0860                  | 54.8                  | 1                          | I                      |
| 17   | 8      | 10     | +       | 16    | 8       | 9       | +        | 1119.0877                  | 54.8                  | -1                         | I                      |
| 22   | 16     | 6      | -       | 21    | 16      | 5       | -        | 1119.0950                  | 86.1                  | 2                          | I                      |
| 22   | 16     | 6      | +       | 21    | 16      | 5       | +        | 1119.1020                  | 86.0                  | -6                         | I                      |
| 16   | 5      | 11     | -       | 15    | 5       | 10      | -        | 1119.1108                  | 40.5                  | -4                         | I                      |
| 28   | 22     | 6      | +       | 27    | 22      | 5       | +        | 1119.1178                  | 51.5                  | 0                          | II                     |
| 18   | 10     | 8      | -       | 17    | 10      | 7       | -        | 1119.1214                  | 72.4                  | 1                          | I                      |
| 18   | 10     | 8      | +       | 17    | 10      | 7       | +        | 1119.1252                  | 71.5                  | -1                         | I                      |
| 23   | 17     | 7      | -       | 22    | 17      | 6       | -        | 1119.1705                  | 93.0                  | -2                         | I                      |
| 23   | 17     | 7      | +       | 22    | 17      | 6       | +        | 1119.1785                  | 94.0                  | 2                          | I                      |
| 27   | 21     | 7      | +       | 26    | 21      | 6       | +        | 1119.1879                  | 79.2                  | 2                          | II                     |
| 24   | 18     | 6      | -       | 23    | 18      | 5       | -        | 1119.2169                  | 57.0                  | -1                         | II                     |
| 26   | 20     | 6      | -       | 25    | 20      | 5       | -        | 1119.2218                  | 74.1                  | -1                         | II                     |
| 24   | 18     | 6      | +       | 23    | 18      | 5       | +        | 1119.2246                  | 54.5                  | 0                          | II                     |
| 26   | 20     | 6      | +       | 25    | 20      | 5       | +        | 1119.2290                  | 68.3                  | 1                          | II                     |
| 25   | 19     | 7      | -       | 24    | 19      | 6       | -        | 1119.2340                  | 64.7                  | -1                         | II                     |
| 20   | 13     | 7      | -       | 19    | 13      | 6       | -        | 1119.2372                  | 85.6                  | 0                          | I                      |
| 20   | 13     | 7      | +       | 19    | 13      | 6       | +        | 1119.2434                  | 83.9                  | -1                         | I                      |
| 56   | 6      | 50     | -       | 56    | 6       | 51      | -        | 1119.2563                  | 41.0                  | 2                          | II                     |
| 16   | 4      | 12     | +       | 15    | 4       | 11      | +        | 1119.2721                  | 48.9                  | -1                         | I                      |
| 16   | 4      | 12     | -       | 15    | 4       | 11      | -        | 1119.2757                  | 47.7                  | 0                          | I                      |
| 17   | 7      | 11     | -       | 16    | 7       | 10      | -        | 1119.3060                  | 39.0                  | 2                          | I                      |
| 17   | 7      | 11     | +       | 16    | 7       | 10      | +        | 1119.3060                  | 39.0                  | -2                         | I                      |
| 17   | 1      | 17     | -       | 16    | 1       | 16      | -        | 1119.3492                  | 21.2                  | -1                         | I                      |
| 17   | 1      | 17     | +       | 16    | 1       | 16      | +        | 1119.3492                  | 21.2                  | 0                          | I                      |
| 19   | 11     | 9      | -       | 18    | 11      | 8       | -        | 1119.3725                  | 77.7                  | -1                         | I                      |
| 19   | 11     | 9      | +       | 18    | 11      | 8       | +        | 1119.3769                  | 77.1                  | -1                         | I                      |
| 18   | 9      | 9      | -       | 17    | 9       | 8       | -        | 1119.3952                  | 66.9                  | 2                          | I                      |
| 18   | 9      | 9      | +       | 17    | 9       | 8       | +        | 1119.3973                  | 65.8                  | -2                         | I                      |
| 21   | 14     | 8      | +       | 20    | 14      | 7       | +        | 1119.4067                  | 87.6                  | 1                          | I                      |
| 31   | 24     | 8      | -       | 30    | 24      | 7       | -        | 1119.4129                  | 90.9                  | 2                          | II                     |
| 31   | 24     | 8      | +       | 30    | 24      | 7       | +        | 1119.4177                  | 90.8                  | 2                          | II                     |
| 16   | 1      | 15     | +       | 15    | 1       | 14      | +        | 1119.4645                  | 35.1                  | 3                          | I                      |
| 16   | 1      | 15     | -       | 15    | 1       | 14      | -        | 1119.4645                  | 35.1                  | -23                        | I                      |

| $N'$ | $K'_a$ | $K'_c$ | $J'^a)$ | $N''$ | $K''_a$ | $K''_c$ | $J''^b)$ | $\nu$ , exp. <sup>c)</sup> | Transm. <sup>d)</sup> | $\delta_\nu$ <sup>e)</sup> | Spectrum <sup>f)</sup> |
|------|--------|--------|---------|-------|---------|---------|----------|----------------------------|-----------------------|----------------------------|------------------------|
|      |        | 1      |         |       |         | 2       |          | 3                          | 4                     | 5                          | 6                      |
| 17   | 6      | 12     | —       | 16    | 6       | 11      | —        | 1119.5001                  | 39.8                  | -6                         | I                      |
| 17   | 6      | 12     | +       | 16    | 6       | 11      | +        | 1119.5001                  | 39.8                  | 5                          | I                      |
| 16   | 3      | 13     | +       | 15    | 3       | 12      | +        | 1119.5119                  | 46.5                  | 0                          | I                      |
| 16   | 3      | 13     | —       | 15    | 3       | 12      | —        | 1119.5182                  | 47.8                  | -1                         | I                      |
| 22   | 15     | 7      | —       | 21    | 15      | 6       | —        | 1119.5333                  | 90.6                  | -1                         | I                      |
| 30   | 23     | 7      | —       | 29    | 23      | 6       | —        | 1119.5399                  | 82.5                  | -3                         | I                      |
| 22   | 15     | 7      | +       | 21    | 15      | 6       | +        | 1119.5399                  | 82.5                  | 2                          | I                      |
| 20   | 12     | 8      | —       | 19    | 12      | 7       | —        | 1119.5934                  | 80.9                  | 1                          | I                      |
| 20   | 12     | 8      | +       | 19    | 12      | 7       | +        | 1119.5980                  | 80.2                  | 0                          | I                      |
| 23   | 16     | 8      | —       | 22    | 16      | 7       | —        | 1119.6365                  | 90.2                  | 1                          | I                      |
| 18   | 8      | 10     | —       | 17    | 8       | 9       | —        | 1119.6422                  | 44.1                  | 5                          | I                      |
| 18   | 8      | 10     | +       | 17    | 8       | 9       | +        | 1119.6422                  | 44.1                  | -5                         | I                      |
| 23   | 16     | 8      | +       | 22    | 16      | 7       | +        | 1119.6424                  | 44.1                  | -3                         | I                      |
| 17   | 5      | 13     | +       | 16    | 5       | 12      | +        | 1119.6710                  | 47.4                  | 1                          | I                      |
| 17   | 5      | 13     | —       | 16    | 5       | 12      | —        | 1119.6733                  | 39.2                  | 1                          | I                      |
| 19   | 10     | 10     | —       | 18    | 10      | 9       | —        | 1119.6733                  | 39.2                  | -3                         | I                      |
| 19   | 10     | 10     | +       | 18    | 10      | 9       | +        | 1119.6763                  | 68.3                  | -2                         | I                      |
| 24   | 17     | 7      | —       | 23    | 17      | 6       | —        | 1119.7102                  | 92.0                  | 4                          | I                      |
| 28   | 21     | 7      | +       | 27    | 21      | 6       | +        | 1119.7160                  | 6.3                   | -7                         | II                     |
| 24   | 17     | 7      | +       | 23    | 17      | 6       | +        | 1119.7160                  | 82.3                  | 0                          | I                      |
| 16   | 2      | 14     | +       | 15    | 2       | 13      | +        | 1119.7280                  | 39.7                  | 2                          | I                      |
| 16   | 2      | 14     | —       | 15    | 2       | 13      | —        | 1119.7324                  | 28.4                  | -11                        | I                      |
| 17   | 2      | 16     | +       | 16    | 2       | 15      | +        | 1119.7324                  | 28.4                  | 21                         | I                      |
| 17   | 2      | 16     | —       | 16    | 2       | 15      | —        | 1119.7324                  | 28.4                  | 5                          | I                      |
| 25   | 18     | 8      | —       | 24    | 18      | 7       | —        | 1119.7538                  | 40.8                  | 0                          | II                     |
| 27   | 20     | 8      | —       | 26    | 20      | 7       | —        | 1119.7538                  | 40.8                  | -4                         | II                     |
| 25   | 18     | 8      | +       | 24    | 18      | 7       | +        | 1119.7599                  | 38.4                  | 0                          | II                     |
| 27   | 20     | 8      | +       | 26    | 20      | 7       | +        | 1119.7599                  | 38.4                  | 0                          | II                     |
| 26   | 19     | 7      | —       | 25    | 19      | 6       | —        | 1119.7685                  | 96.6                  | 0                          | I                      |
| 26   | 19     | 7      | +       | 25    | 19      | 6       | +        | 1119.7744                  | 96.2                  | 0                          | I                      |
| 33   | 25     | 9      | —       | 32    | 25      | 8       | —        | 1119.7791                  | 92.7                  | 3                          | II                     |
| 21   | 13     | 9      | —       | 20    | 13      | 8       | —        | 1119.7837                  | 84.8                  | 0                          | I                      |
| 21   | 13     | 9      | +       | 20    | 13      | 8       | +        | 1119.7886                  | 84.0                  | 0                          | I                      |
| 17   | 4      | 14     | +       | 16    | 4       | 13      | +        | 1119.8172                  | 46.2                  | -1                         | I                      |
| 17   | 4      | 14     | —       | 16    | 4       | 13      | —        | 1119.8206                  | 48.9                  | 0                          | I                      |
| 18   | 7      | 11     | —       | 17    | 7       | 10      | —        | 1119.8622                  | 37.4                  | -2                         | I                      |
| 18   | 7      | 11     | +       | 17    | 7       | 10      | +        | 1119.8622                  | 37.4                  | 2                          | I                      |
| 18   | 0      | 18     | +       | 17    | 0       | 17      | +        | 1119.8745                  | 20.2                  | -2                         | I                      |
| 18   | 0      | 18     | —       | 17    | 0       | 17      | —        | 1119.8745                  | 20.2                  | 1                          | I                      |
| 17   | 3      | 15     | +       | 16    | 3       | 14      | +        | 1119.8819                  | 42.8                  | -1                         | I                      |
| 17   | 3      | 15     | —       | 16    | 3       | 14      | —        | 1119.8850                  | 45.0                  | -1                         | I                      |
| 20   | 11     | 9      | —       | 19    | 11      | 8       | —        | 1119.9218                  | 75.4                  | 1                          | I                      |
| 20   | 11     | 9      | +       | 19    | 11      | 8       | +        | 1119.9247                  | 73.7                  | -2                         | I                      |
| 32   | 24     | 8      | —       | 31    | 24      | 7       | —        | 1119.9349                  | 87.9                  | -1                         | II                     |
| 32   | 24     | 8      | +       | 31    | 24      | 7       | +        | 1119.9393                  | 11.0                  | 5                          | II                     |
| 22   | 14     | 8      | —       | 21    | 14      | 7       | —        | 1119.9443                  | 84.0                  | 3                          | I                      |
| 19   | 9      | 11     | —       | 18    | 9       | 10      | —        | 1119.9484                  | 50.3                  | 10                         | I                      |
| 22   | 14     | 8      | +       | 21    | 14      | 7       | +        | 1119.9484                  | 50.3                  | -6                         | I                      |
| 19   | 9      | 11     | +       | 18    | 9       | 10      | +        | 1119.9484                  | 50.3                  | -5                         | I                      |
| 18   | 6      | 12     | —       | 17    | 6       | 11      | —        | 1120.0576                  | 46.6                  | -11                        | I                      |
| 18   | 6      | 12     | +       | 17    | 6       | 11      | +        | 1120.0576                  | 46.6                  | 5                          | I                      |
| 31   | 23     | 9      | —       | 30    | 23      | 8       | —        | 1120.0636                  | 58.4                  | -3                         | II                     |
| 23   | 15     | 9      | —       | 22    | 15      | 8       | —        | 1120.0745                  | 87.8                  | 2                          | I                      |
| 23   | 15     | 9      | +       | 22    | 15      | 8       | +        | 1120.0793                  | 89.8                  | -1                         | I                      |
| 35   | 26     | 10     | —       | 34    | 26      | 9       | —        | 1120.1134                  | 95.8                  | 7                          | II                     |
| 35   | 26     | 10     | +       | 34    | 26      | 9       | +        | 1120.1153                  | 95.5                  | 2                          | II                     |
| 21   | 12     | 10     | —       | 20    | 12      | 9       | —        | 1120.1394                  | 80.7                  | 0                          | I                      |
| 21   | 12     | 10     | +       | 20    | 12      | 9       | +        | 1120.1429                  | 79.4                  | 0                          | I                      |
| 30   | 22     | 8      | —       | 29    | 22      | 7       | —        | 1120.1652                  | 77.6                  | 1                          | II                     |
| 30   | 22     | 8      | +       | 29    | 22      | 7       | +        | 1120.1691                  | 81.0                  | -2                         | II                     |
| 24   | 16     | 8      | —       | 23    | 16      | 7       | —        | 1120.1746                  | 92.6                  | -2                         | I                      |
| 24   | 16     | 8      | +       | 23    | 16      | 7       | +        | 1120.1800                  | 91.6                  | 1                          | I                      |
| 19   | 8      | 12     | +       | 18    | 8       | 11      | +        | 1120.1946                  | 42.7                  | -1                         | I                      |
| 19   | 8      | 12     | —       | 18    | 8       | 11      | —        | 1120.1946                  | 42.7                  | 1                          | I                      |
| 34   | 3      | 31     | —       | 34    | 3       | 32      | —        | 1120.2006                  | 69.8                  | -2                         | II                     |
| 20   | 10     | 10     | —       | 19    | 10      | 9       | —        | 1120.2233                  | 59.1                  | 6                          | I                      |
| 20   | 10     | 10     | +       | 19    | 10      | 9       | +        | 1120.2233                  | 59.1                  | -13                        | I                      |
| 18   | 5      | 13     | +       | 17    | 5       | 12      | +        | 1120.2332                  | 46.0                  | 0                          | I                      |
| 18   | 5      | 13     | —       | 17    | 5       | 12      | —        | 1120.2360                  | 51.2                  | -1                         | I                      |
| 25   | 17     | 9      | —       | 24    | 17      | 8       | —        | 1120.2455                  | 92.5                  | -2                         | I                      |
| 25   | 17     | 9      | +       | 24    | 17      | 8       | +        | 1120.2513                  | 87.7                  | 6                          | I                      |
| 28   | 20     | 8      | —       | 27    | 20      | 7       | —        | 1120.2832                  | 68.7                  | -2                         | II                     |

| $N'$ | $K'_a$ | $K'_c$ | $J'^a)$ | $N''$ | $K''_a$ | $K''_c$ | $J''^b)$ | $\nu$ , exp. <sup>c)</sup> | Transm. <sup>d)</sup> | $\delta_\nu$ <sup>e)</sup> | Spectrum <sup>f)</sup> |
|------|--------|--------|---------|-------|---------|---------|----------|----------------------------|-----------------------|----------------------------|------------------------|
|      |        | 1      |         |       |         | 2       |          | 3                          | 4                     | 5                          | 6                      |
| 26   | 18     | 8      | —       | 25    | 18      | 7       | —        | 1120.2872                  | 93.6                  | -1                         | I                      |
| 26   | 18     | 8      | +       | 25    | 18      | 7       | +        | 1120.2921                  | 95.3                  | 0                          | I                      |
| 27   | 19     | 9      | —       | 26    | 19      | 8       | —        | 1120.3019                  | 13.0                  | 22                         | II                     |
| 22   | 13     | 9      | —       | 21    | 13      | 8       | —        | 1120.3271                  | 79.9                  | 1                          | I                      |
| 22   | 13     | 9      | +       | 21    | 13      | 8       | +        | 1120.3306                  | 82.3                  | -1                         | I                      |
| 28   | 2      | 26     | +       | 28    | 2       | 27      | +        | 1120.3306                  | 82.3                  | 7                          | I                      |
| 19   | 1      | 19     | —       | 18    | 1       | 18      | —        | 1120.3545                  | 20.9                  | 0                          | I                      |
| 19   | 1      | 19     | +       | 18    | 1       | 18      | +        | 1120.3545                  | 20.9                  | -1                         | I                      |
| 19   | 7      | 13     | +       | 18    | 7       | 12      | +        | 1120.4156                  | 40.3                  | 6                          | I                      |
| 19   | 7      | 13     | —       | 18    | 7       | 12      | —        | 1120.4156                  | 40.3                  | -4                         | I                      |
| 18   | 4      | 14     | +       | 17    | 4       | 13      | +        | 1120.4181                  | 43.8                  | -2                         | I                      |
| 18   | 4      | 14     | —       | 17    | 4       | 13      | —        | 1120.4229                  | 49.7                  | 0                          | I                      |
| 33   | 24     | 10     | —       | 32    | 24      | 9       | —        | 1120.4543                  | 87.4                  | 1                          | II                     |
| 18   | 1      | 17     | —       | 17    | 1       | 16      | —        | 1120.4645                  | 25.5                  | -4                         | I                      |
| 21   | 11     | 11     | —       | 20    | 11      | 10      | —        | 1120.4645                  | 25.5                  | -31                        | I                      |
| 18   | 1      | 17     | +       | 17    | 1       | 16      | +        | 1120.4645                  | 25.5                  | 3                          | I                      |
| 23   | 14     | 10     | —       | 22    | 14      | 9       | —        | 1120.4844                  | 86.6                  | 0                          | I                      |
| 23   | 14     | 10     | +       | 22    | 14      | 9       | +        | 1120.4883                  | 86.2                  | 0                          | I                      |
| 20   | 9      | 11     | +       | 19    | 9       | 10      | +        | 1120.4970                  | 48.7                  | -4                         | I                      |
| 20   | 9      | 11     | —       | 19    | 9       | 10      | —        | 1120.4970                  | 48.7                  | 3                          | I                      |
| 32   | 23     | 9      | —       | 31    | 23      | 8       | —        | 1120.5855                  | 86.3                  | 10                         | II                     |
| 32   | 23     | 9      | +       | 31    | 23      | 8       | +        | 1120.5874                  | 85.8                  | -1                         | II                     |
| 19   | 6      | 14     | +       | 18    | 6       | 13      | +        | 1120.6120                  | 46.0                  | 1                          | I                      |
| 24   | 15     | 9      | —       | 23    | 15      | 8       | —        | 1120.6120                  | 46.0                  | -1                         | I                      |
| 19   | 6      | 14     | —       | 18    | 6       | 13      | —        | 1120.6120                  | 46.0                  | -20                        | I                      |
| 24   | 15     | 9      | +       | 23    | 15      | 8       | +        | 1120.6120                  | 46.0                  | -39                        | I                      |
| 22   | 12     | 10     | —       | 21    | 12      | 9       | —        | 1120.6825                  | 77.7                  | 1                          | I                      |
| 22   | 12     | 10     | +       | 21    | 12      | 9       | +        | 1120.6849                  | 76.2                  | 0                          | I                      |
| 31   | 22     | 10     | +       | 30    | 22      | 9       | +        | 1120.6906                  | 12.5                  | 0                          | II                     |
| 25   | 16     | 10     | —       | 24    | 16      | 9       | —        | 1120.7134                  | 43.2                  | 34                         | I                      |
| 18   | 3      | 15     | +       | 17    | 3       | 14      | +        | 1120.7134                  | 43.2                  | 0                          | I                      |
| 25   | 16     | 10     | +       | 24    | 16      | 9       | +        | 1120.7134                  | 43.2                  | -5                         | I                      |
| 18   | 3      | 15     | —       | 17    | 3       | 14      | —        | 1120.7204                  | 48.8                  | -1                         | I                      |
| 20   | 8      | 12     | —       | 19    | 8       | 11      | —        | 1120.7439                  | 40.6                  | -4                         | I                      |
| 20   | 8      | 12     | +       | 19    | 8       | 11      | +        | 1120.7439                  | 40.6                  | 1                          | I                      |
| 19   | 2      | 18     | +       | 18    | 2       | 17      | +        | 1120.7623                  | 31.4                  | 5                          | I                      |
| 19   | 2      | 18     | —       | 18    | 2       | 17      | —        | 1120.7623                  | 31.4                  | -9                         | I                      |
| 21   | 10     | 12     | +       | 20    | 10      | 11      | +        | 1120.7692                  | 56.3                  | -6                         | I                      |
| 21   | 10     | 12     | —       | 20    | 10      | 11      | —        | 1120.7692                  | 56.3                  | 5                          | I                      |
| 26   | 17     | 9      | —       | 25    | 17      | 8       | —        | 1120.7774                  | 84.1                  | -10                        | I                      |
| 26   | 17     | 9      | +       | 25    | 17      | 8       | +        | 1120.7824                  | 91.3                  | 1                          | I                      |
| 19   | 5      | 15     | +       | 18    | 5       | 14      | +        | 1120.7881                  | 50.4                  | 0                          | I                      |
| 19   | 5      | 15     | —       | 18    | 5       | 14      | —        | 1120.7914                  | 49.9                  | 0                          | I                      |
| 29   | 20     | 10     | —       | 28    | 20      | 9       | —        | 1120.8092                  | 70.7                  | -1                         | II                     |
| 29   | 20     | 10     | +       | 28    | 20      | 9       | +        | 1120.8128                  | 64.4                  | 0                          | II                     |
| 35   | 25     | 11     | +       | 34    | 25      | 10      | +        | 1120.8128                  | 64.4                  | -6                         | II                     |
| 42   | 4      | 38     | +       | 42    | 4       | 39      | +        | 1120.8129                  | 96.8                  | 6                          | I                      |
| 27   | 18     | 10     | —       | 26    | 18      | 9       | —        | 1120.8174                  | 52.1                  | -2                         | II                     |
| 27   | 18     | 10     | +       | 26    | 18      | 9       | +        | 1120.8213                  | 50.0                  | -1                         | II                     |
| 28   | 19     | 9      | —       | 27    | 19      | 8       | —        | 1120.8277                  | 61.7                  | -1                         | II                     |
| 28   | 19     | 9      | +       | 27    | 19      | 8       | +        | 1120.8318                  | 48.8                  | 3                          | II                     |
| 18   | 2      | 16     | +       | 17    | 2       | 15      | +        | 1120.8544                  | 43.6                  | -1                         | I                      |
| 18   | 2      | 16     | —       | 17    | 2       | 15      | —        | 1120.8596                  | 44.4                  | 0                          | I                      |
| 20   | 0      | 20     | +       | 19    | 0       | 19      | +        | 1120.8637                  | 19.4                  | -2                         | I                      |
| 20   | 0      | 20     | —       | 19    | 0       | 19      | —        | 1120.8637                  | 19.4                  | 1                          | I                      |
| 23   | 13     | 11     | +       | 22    | 13      | 10      | +        | 1120.8696                  | 80.6                  | -1                         | I                      |
| 23   | 13     | 11     | —       | 22    | 13      | 10      | —        | 1120.8696                  | 80.6                  | 25                         | I                      |
| 19   | 4      | 16     | +       | 18    | 4       | 15      | +        | 1120.9343                  | 48.4                  | -1                         | I                      |
| 19   | 4      | 16     | —       | 18    | 4       | 15      | —        | 1120.9382                  | 49.7                  | 0                          | I                      |
| 19   | 3      | 17     | +       | 18    | 3       | 16      | +        | 1120.9671                  | 27.3                  | -5                         | I                      |
| 20   | 7      | 13     | —       | 19    | 7       | 12      | —        | 1120.9671                  | 27.3                  | 2                          | I                      |
| 20   | 7      | 13     | +       | 19    | 7       | 12      | +        | 1120.9671                  | 27.3                  | 18                         | I                      |
| 19   | 3      | 17     | —       | 18    | 3       | 16      | —        | 1120.9707                  | 44.6                  | 0                          | I                      |
| 34   | 24     | 10     | —       | 33    | 24      | 9       | —        | 1120.9707                  | 44.6                  | 4                          | I                      |
| 22   | 11     | 11     | +       | 21    | 11      | 10      | +        | 1121.0112                  | 63.8                  | -6                         | I                      |
| 22   | 11     | 11     | —       | 21    | 11      | 10      | —        | 1121.0112                  | 63.8                  | 7                          | I                      |
| 24   | 14     | 10     | —       | 23    | 14      | 9       | —        | 1121.0217                  | 86.1                  | 0                          | I                      |
| 24   | 14     | 10     | +       | 23    | 14      | 9       | +        | 1121.0246                  | 82.7                  | 1                          | I                      |
| 21   | 9      | 13     | —       | 20    | 9       | 12      | —        | 1121.0429                  | 48.4                  | 0                          | I                      |
| 21   | 9      | 13     | +       | 20    | 9       | 12      | +        | 1121.0429                  | 48.4                  | 0                          | I                      |
| 33   | 23     | 11     | —       | 32    | 23      | 10      | —        | 1121.1020                  | 84.0                  | -1                         | II                     |
| 33   | 23     | 11     | +       | 32    | 23      | 10      | +        | 1121.1041                  | 86.3                  | 0                          | II                     |

| $N'$ | $K'_a$ | $K'_c$ | $J'^a)$ | $N''$ | $K''_a$ | $K''_c$ | $J''^b)$ | $\nu$ , exp. <sup>c)</sup> | Transm. <sup>d)</sup> | $\delta_\nu$ <sup>e)</sup> | Spectrum <sup>f)</sup> |
|------|--------|--------|---------|-------|---------|---------|----------|----------------------------|-----------------------|----------------------------|------------------------|
|      |        | 1      |         |       |         | 2       |          | 3                          | 4                     | 5                          | 6                      |
| 37   | 26     | 12     | +       | 36    | 26      | 11      | +        | 1121.1383                  | 91.9                  | -2                         | II                     |
| 25   | 15     | 11     | -       | 24    | 15      | 10      | -        | 1121.1465                  | 88.9                  | -1                         | I                      |
| 25   | 15     | 11     | +       | 24    | 15      | 10      | +        | 1121.1492                  | 89.0                  | -2                         | I                      |
| 20   | 6      | 14     | +       | 19    | 6       | 13      | +        | 1121.1644                  | 50.4                  | 1                          | I                      |
| 20   | 6      | 14     | -       | 19    | 6       | 13      | -        | 1121.1668                  | 52.6                  | -1                         | I                      |
| 32   | 22     | 10     | -       | 31    | 22      | 9       | -        | 1121.2067                  | 83.7                  | 2                          | II                     |
| 32   | 22     | 10     | +       | 31    | 22      | 9       | +        | 1121.2088                  | 82.9                  | 1                          | II                     |
| 23   | 12     | 12     | -       | 22    | 12      | 11      | -        | 1121.2229                  | 72.9                  | 7                          | I                      |
| 23   | 12     | 12     | +       | 22    | 12      | 11      | +        | 1121.2229                  | 72.9                  | -9                         | I                      |
| 26   | 16     | 10     | -       | 25    | 16      | 9       | -        | 1121.2418                  | 91.2                  | -1                         | I                      |
| 26   | 16     | 10     | +       | 25    | 16      | 9       | +        | 1121.2448                  | 91.2                  | 0                          | I                      |
| 31   | 21     | 11     | -       | 30    | 21      | 10      | -        | 1121.2834                  | 75.5                  | 1                          | II                     |
| 31   | 21     | 11     | +       | 30    | 21      | 10      | +        | 1121.2859                  | 71.2                  | 3                          | II                     |
| 21   | 8      | 14     | -       | 20    | 8       | 13      | -        | 1121.2905                  | 48.2                  | -6                         | I                      |
| 21   | 8      | 14     | +       | 20    | 8       | 13      | +        | 1121.2905                  | 48.2                  | 5                          | I                      |
| 27   | 17     | 11     | -       | 26    | 17      | 10      | -        | 1121.3079                  | 36.0                  | 1                          | II                     |
| 22   | 10     | 12     | -       | 21    | 10      | 11      | -        | 1121.3116                  | 50.4                  | 0                          | I                      |
| 22   | 10     | 12     | +       | 21    | 10      | 11      | +        | 1121.3116                  | 50.4                  | -2                         | I                      |
| 27   | 17     | 11     | +       | 26    | 17      | 10      | +        | 1121.3116                  | 50.4                  | 9                          | I                      |
| 30   | 20     | 10     | -       | 29    | 20      | 9       | -        | 1121.3315                  | 30.9                  | -6                         | II                     |
| 30   | 20     | 10     | +       | 29    | 20      | 9       | +        | 1121.3349                  | 50.5                  | 2                          | II                     |
| 21   | 1      | 21     | -       | 20    | 1       | 20      | -        | 1121.3458                  | 20.1                  | 0                          | I                      |
| 21   | 1      | 21     | +       | 20    | 1       | 20      | +        | 1121.3458                  | 20.1                  | -1                         | I                      |
| 20   | 5      | 15     | +       | 19    | 5       | 14      | +        | 1121.3492                  | 47.4                  | -2                         | I                      |
| 20   | 5      | 15     | -       | 19    | 5       | 14      | -        | 1121.3531                  | 49.9                  | 0                          | I                      |
| 24   | 13     | 11     | -       | 23    | 13      | 10      | -        | 1121.4050                  | 79.1                  | 12                         | I                      |
| 24   | 13     | 11     | +       | 23    | 13      | 10      | +        | 1121.4050                  | 79.1                  | -6                         | I                      |
| 20   | 1      | 19     | -       | 19    | 1       | 18      | -        | 1121.4325                  | 23.3                  | -2                         | I                      |
| 20   | 1      | 19     | +       | 19    | 1       | 18      | +        | 1121.4325                  | 23.3                  | 1                          | I                      |
| 21   | 7      | 15     | +       | 20    | 7       | 14      | +        | 1121.5130                  | 51.2                  | 2                          | I                      |
| 21   | 7      | 15     | -       | 20    | 7       | 14      | -        | 1121.5130                  | 51.2                  | -18                        | I                      |
| 23   | 11     | 13     | +       | 22    | 11      | 12      | +        | 1121.5504                  | 59.8                  | -3                         | I                      |
| 23   | 11     | 13     | -       | 22    | 11      | 12      | -        | 1121.5504                  | 59.8                  | 3                          | I                      |
| 25   | 14     | 12     | -       | 24    | 14      | 11      | -        | 1121.5561                  | 83.2                  | 4                          | I                      |
| 20   | 4      | 16     | +       | 19    | 4       | 15      | +        | 1121.5682                  | 48.0                  | -1                         | I                      |
| 20   | 4      | 16     | -       | 19    | 4       | 15      | -        | 1121.5739                  | 50.4                  | 0                          | I                      |
| 22   | 9      | 13     | +       | 21    | 9       | 12      | +        | 1121.5857                  | 50.1                  | 4                          | I                      |
| 22   | 9      | 13     | -       | 21    | 9       | 12      | -        | 1121.5857                  | 50.1                  | -3                         | I                      |
| 34   | 23     | 11     | +       | 33    | 23      | 10      | +        | 1121.6173                  | 82.8                  | -4                         | II                     |
| 34   | 23     | 11     | -       | 33    | 23      | 10      | -        | 1121.6173                  | 82.8                  | 8                          | II                     |
| 26   | 15     | 11     | +       | 25    | 15      | 10      | +        | 1121.6796                  | 87.8                  | -2                         | I                      |
| 26   | 15     | 11     | -       | 25    | 15      | 10      | -        | 1121.6796                  | 87.8                  | 17                         | I                      |
| 21   | 6      | 16     | +       | 20    | 6       | 15      | +        | 1121.7138                  | 51.1                  | 1                          | I                      |
| 21   | 6      | 16     | -       | 20    | 6       | 15      | -        | 1121.7167                  | 53.7                  | 0                          | I                      |
| 33   | 22     | 12     | -       | 32    | 22      | 11      | -        | 1121.7240                  | 42.4                  | 15                         | II                     |
| 33   | 22     | 12     | +       | 32    | 22      | 11      | +        | 1121.7240                  | 42.4                  | 1                          | II                     |
| 24   | 12     | 12     | -       | 23    | 12      | 11      | -        | 1121.7592                  | 66.3                  | 4                          | I                      |
| 24   | 12     | 12     | +       | 23    | 12      | 11      | +        | 1121.7592                  | 66.3                  | -4                         | I                      |
| 21   | 2      | 20     | -       | 20    | 2       | 19      | -        | 1121.7710                  | 26.3                  | -7                         | I                      |
| 27   | 16     | 12     | -       | 26    | 16      | 11      | -        | 1121.7710                  | 26.3                  | 4                          | I                      |
| 21   | 2      | 20     | +       | 20    | 2       | 19      | +        | 1121.7710                  | 26.3                  | 4                          | I                      |
| 32   | 21     | 11     | -       | 31    | 21      | 10      | -        | 1121.8013                  | 68.7                  | 3                          | II                     |
| 32   | 21     | 11     | +       | 31    | 21      | 10      | +        | 1121.8013                  | 68.7                  | -12                        | II                     |
| 22   | 8      | 14     | -       | 21    | 8       | 13      | -        | 1121.8343                  | 50.0                  | -8                         | I                      |
| 22   | 8      | 14     | +       | 21    | 8       | 13      | +        | 1121.8343                  | 50.0                  | 9                          | I                      |
| 22   | 0      | 22     | +       | 21    | 0       | 21      | +        | 1121.8431                  | 21.0                  | -1                         | I                      |
| 22   | 0      | 22     | -       | 21    | 0       | 21      | -        | 1121.8431                  | 21.0                  | 1                          | I                      |
| 23   | 10     | 14     | +       | 22    | 10      | 13      | +        | 1121.8511                  | 52.1                  | 2                          | I                      |
| 23   | 10     | 14     | -       | 22    | 10      | 13      | -        | 1121.8511                  | 52.1                  | -2                         | I                      |
| 29   | 18     | 12     | +       | 28    | 18      | 11      | +        | 1121.8706                  | 29.3                  | 1                          | II                     |
| 30   | 19     | 11     | -       | 29    | 19      | 10      | -        | 1121.8745                  | 55.7                  | 1                          | II                     |
| 30   | 19     | 11     | +       | 29    | 19      | 10      | +        | 1121.8759                  | 56.5                  | -3                         | II                     |
| 21   | 5      | 17     | +       | 20    | 5       | 16      | +        | 1121.8954                  | 50.9                  | -1                         | I                      |
| 21   | 5      | 17     | -       | 20    | 5       | 16      | -        | 1121.8993                  | 51.5                  | 0                          | I                      |
| 20   | 3      | 17     | +       | 19    | 3       | 16      | +        | 1121.9042                  | 45.4                  | -1                         | I                      |
| 20   | 3      | 17     | -       | 19    | 3       | 16      | -        | 1121.9116                  | 47.3                  | -1                         | I                      |
| 20   | 2      | 18     | +       | 19    | 2       | 17      | +        | 1121.9352                  | 40.8                  | -1                         | I                      |
| 25   | 13     | 13     | -       | 24    | 13      | 12      | -        | 1121.9394                  | 40.7                  | 19                         | I                      |
| 20   | 2      | 18     | -       | 19    | 2       | 17      | -        | 1121.9394                  | 40.7                  | -2                         | I                      |
| 25   | 13     | 13     | +       | 24    | 13      | 12      | +        | 1121.9394                  | 40.7                  | 9                          | I                      |
| 21   | 3      | 19     | +       | 20    | 3       | 18      | +        | 1122.0283                  | 45.6                  | -1                         | I                      |
| 21   | 3      | 19     | -       | 20    | 3       | 18      | -        | 1122.0314                  | 44.1                  | 0                          | I                      |

| $N'$ | $K'_a$ | $K'_c$ | $J'^a)$ | $N''$ | $K''_a$ | $K''_c$ | $J''^b)$ | $\nu$ , exp. <sup>c)</sup> | Transm. <sup>d)</sup> | $\delta_\nu$ <sup>e)</sup> | Spectrum <sup>f)</sup> |
|------|--------|--------|---------|-------|---------|---------|----------|----------------------------|-----------------------|----------------------------|------------------------|
|      |        | 1      |         |       |         | 2       |          | 3                          | 4                     | 5                          | 6                      |
| 21   | 4      | 18     | +       | 20    | 4       | 17      | +        | 1122.0360                  | 46.0                  | 3                          | I                      |
| 21   | 4      | 18     | -       | 20    | 4       | 17      | -        | 1122.0404                  | 49.6                  | 0                          | I                      |
| 22   | 7      | 15     | +       | 21    | 7       | 14      | +        | 1122.0577                  | 57.0                  | 1                          | I                      |
| 22   | 7      | 15     | -       | 21    | 7       | 14      | -        | 1122.0601                  | 58.0                  | -1                         | I                      |
| 24   | 11     | 13     | -       | 23    | 11      | 12      | -        | 1122.0866                  | 48.3                  | 0                          | I                      |
| 24   | 11     | 13     | +       | 23    | 11      | 12      | +        | 1122.0866                  | 48.3                  | 1                          | I                      |
| 26   | 14     | 12     | -       | 25    | 14      | 11      | -        | 1122.0866                  | 48.3                  | 2                          | I                      |
| 23   | 9      | 15     | -       | 22    | 9       | 14      | -        | 1122.1255                  | 55.4                  | -7                         | I                      |
| 23   | 9      | 15     | +       | 22    | 9       | 14      | +        | 1122.1255                  | 55.4                  | 6                          | I                      |
| 39   | 26     | 14     | -       | 38    | 26      | 13      | -        | 1122.1508                  | 93.9                  | 0                          | II                     |
| 27   | 15     | 13     | +       | 26    | 15      | 12      | +        | 1122.2065                  | 83.9                  | -5                         | I                      |
| 27   | 15     | 13     | -       | 26    | 15      | 12      | -        | 1122.2065                  | 83.9                  | 6                          | I                      |
| 34   | 22     | 12     | -       | 33    | 22      | 11      | -        | 1122.2357                  | 74.5                  | 4                          | II                     |
| 34   | 22     | 12     | +       | 33    | 22      | 11      | +        | 1122.2357                  | 74.5                  | -2                         | II                     |
| 22   | 6      | 16     | +       | 21    | 6       | 15      | +        | 1122.2616                  | 54.5                  | 0                          | I                      |
| 22   | 6      | 16     | -       | 21    | 6       | 15      | -        | 1122.2650                  | 55.7                  | 0                          | I                      |
| 25   | 12     | 14     | -       | 24    | 12      | 13      | -        | 1122.2921                  | 63.9                  | 0                          | I                      |
| 25   | 12     | 14     | +       | 24    | 12      | 13      | +        | 1122.2921                  | 63.9                  | -1                         | I                      |
| 44   | 4      | 40     | -       | 44    | 4       | 41      | -        | 1122.2965                  | 86.5                  | -7                         | I                      |
| 33   | 21     | 13     | -       | 32    | 21      | 12      | -        | 1122.3166                  | 14.1                  | 10                         | II                     |
| 23   | 1      | 23     | -       | 22    | 1       | 22      | -        | 1122.3240                  | 21.9                  | 1                          | I                      |
| 23   | 1      | 23     | +       | 22    | 1       | 22      | +        | 1122.3240                  | 21.9                  | -1                         | I                      |
| 29   | 17     | 13     | +       | 28    | 17      | 12      | +        | 1122.3576                  | 90.6                  | -6                         | I                      |
| 29   | 17     | 13     | -       | 28    | 17      | 12      | -        | 1122.3576                  | 90.6                  | 5                          | I                      |
| 32   | 20     | 12     | -       | 31    | 20      | 11      | -        | 1122.3686                  | 53.2                  | 4                          | II                     |
| 32   | 20     | 12     | +       | 31    | 20      | 11      | +        | 1122.3686                  | 53.2                  | -4                         | II                     |
| 23   | 8      | 16     | +       | 22    | 8       | 15      | +        | 1122.3742                  | 58.5                  | 3                          | I                      |
| 23   | 8      | 16     | -       | 22    | 8       | 15      | -        | 1122.3750                  | 58.5                  | -10                        | I                      |
| 22   | 1      | 21     | +       | 21    | 1       | 20      | +        | 1122.3814                  | 23.7                  | 0                          | I                      |
| 22   | 1      | 21     | -       | 21    | 1       | 20      | -        | 1122.3814                  | 23.7                  | -1                         | I                      |
| 24   | 10     | 14     | +       | 23    | 10      | 13      | +        | 1122.3874                  | 54.8                  | 5                          | I                      |
| 24   | 10     | 14     | -       | 23    | 10      | 13      | -        | 1122.3874                  | 54.8                  | -5                         | I                      |
| 31   | 19     | 13     | +       | 30    | 19      | 12      | +        | 1122.3934                  | 39.0                  | -5                         | II                     |
| 22   | 5      | 17     | +       | 21    | 5       | 16      | +        | 1122.4596                  | 51.9                  | -1                         | I                      |
| 22   | 5      | 17     | -       | 21    | 5       | 16      | -        | 1122.4642                  | 52.5                  | 0                          | I                      |
| 26   | 13     | 13     | +       | 25    | 13      | 12      | +        | 1122.4679                  | 69.4                  | -2                         | I                      |
| 26   | 13     | 13     | -       | 25    | 13      | 12      | -        | 1122.4679                  | 69.4                  | 0                          | I                      |
| 37   | 24     | 14     | +       | 36    | 24      | 13      | +        | 1122.4999                  | 78.2                  | -1                         | I                      |
| 37   | 24     | 14     | -       | 36    | 24      | 13      | -        | 1122.5000                  | 78.2                  | -4                         | II                     |
| 60   | 6      | 54     | -       | 60    | 6       | 55      | -        | 1122.5716                  | 65.4                  | -5                         | II                     |
| 52   | 5      | 47     | +       | 52    | 5       | 48      | +        | 1122.5782                  | 97.6                  | -8                         | I                      |
| 23   | 7      | 17     | +       | 22    | 7       | 16      | +        | 1122.5997                  | 58.5                  | 1                          | I                      |
| 23   | 7      | 17     | -       | 22    | 7       | 16      | -        | 1122.6025                  | 56.8                  | 0                          | I                      |
| 27   | 14     | 14     | -       | 26    | 14      | 13      | -        | 1122.6142                  | 77.0                  | 2                          | I                      |
| 27   | 14     | 14     | +       | 26    | 14      | 13      | +        | 1122.6142                  | 77.0                  | -2                         | I                      |
| 25   | 11     | 15     | -       | 24    | 11      | 14      | -        | 1122.6196                  | 61.2                  | -4                         | I                      |
| 25   | 11     | 15     | +       | 24    | 11      | 14      | +        | 1122.6196                  | 61.2                  | 3                          | I                      |
| 36   | 23     | 13     | +       | 35    | 23      | 12      | +        | 1122.6360                  | 78.1                  | 2                          | II                     |
| 36   | 23     | 13     | -       | 35    | 23      | 12      | -        | 1122.6360                  | 78.1                  | 0                          | II                     |
| 24   | 9      | 15     | +       | 23    | 9       | 14      | +        | 1122.6621                  | 60.4                  | 5                          | I                      |
| 24   | 9      | 15     | -       | 23    | 9       | 14      | -        | 1122.6621                  | 60.4                  | -12                        | I                      |
| 22   | 4      | 18     | +       | 21    | 4       | 17      | +        | 1122.7257                  | 49.1                  | 0                          | I                      |
| 22   | 4      | 18     | -       | 21    | 4       | 17      | -        | 1122.7324                  | 47.4                  | -1                         | I                      |
| 35   | 22     | 14     | -       | 34    | 22      | 13      | -        | 1122.7449                  | 70.0                  | -1                         | II                     |
| 35   | 22     | 14     | +       | 34    | 22      | 13      | +        | 1122.7449                  | 70.0                  | 0                          | II                     |
| 23   | 2      | 22     | -       | 22    | 2       | 21      | -        | 1122.7587                  | 29.5                  | -6                         | I                      |
| 23   | 2      | 22     | +       | 22    | 2       | 21      | +        | 1122.7587                  | 29.5                  | 3                          | I                      |
| 23   | 6      | 18     | +       | 22    | 6       | 17      | +        | 1122.8054                  | 54.2                  | 0                          | I                      |
| 24   | 0      | 24     | +       | 23    | 0       | 23      | +        | 1122.8119                  | 21.1                  | -2                         | I                      |
| 23   | 6      | 18     | -       | 22    | 6       | 17      | -        | 1122.8119                  | 21.1                  | 28                         | I                      |
| 24   | 0      | 24     | -       | 23    | 0       | 23      | -        | 1122.8119                  | 21.1                  | 1                          | I                      |
| 29   | 16     | 14     | -       | 28    | 16      | 13      | -        | 1122.8185                  | 72.0                  | 1                          | I                      |
| 29   | 16     | 14     | +       | 28    | 16      | 13      | +        | 1122.8185                  | 72.0                  | -3                         | I                      |
| 26   | 12     | 14     | +       | 25    | 12      | 13      | +        | 1122.8220                  | 65.4                  | 2                          | I                      |
| 26   | 12     | 14     | -       | 25    | 12      | 13      | -        | 1122.8220                  | 65.4                  | -3                         | I                      |
| 34   | 21     | 13     | +       | 33    | 21      | 12      | +        | 1122.8269                  | 55.9                  | -1                         | II                     |
| 34   | 21     | 13     | -       | 33    | 21      | 12      | -        | 1122.8269                  | 55.9                  | -1                         | II                     |
| 30   | 17     | 13     | -       | 29    | 17      | 12      | -        | 1122.8772                  | 19.9                  | 2                          | II                     |
| 30   | 17     | 13     | +       | 29    | 17      | 12      | +        | 1122.8772                  | 19.9                  | -2                         | II                     |
| 33   | 20     | 14     | +       | 32    | 20      | 13      | +        | 1122.8815                  | 52.6                  | -1                         | II                     |
| 33   | 20     | 14     | -       | 32    | 20      | 13      | -        | 1122.8815                  | 52.6                  | 0                          | II                     |
| 24   | 8      | 16     | +       | 23    | 8       | 15      | +        | 1122.9116                  | 61.3                  | 1                          | I                      |

| $N'$ | $K'_a$ | $K'_c$ | $J'^a)$ | $N''$ | $K''_a$ | $K''_c$ | $J''^b)$ | $\nu$ , exp. <sup>c)</sup> | Transm. <sup>d)</sup> | $\delta_\nu$ <sup>e)</sup> | Spectrum <sup>f)</sup> |
|------|--------|--------|---------|-------|---------|---------|----------|----------------------------|-----------------------|----------------------------|------------------------|
|      |        | 1      |         |       |         | 2       |          | 3                          | 4                     | 5                          | 6                      |
| 24   | 8      | 16     | —       | 23    | 8       | 15      | —        | 1122.9140                  | 62.4                  | -1                         | I                      |
| 25   | 10     | 16     | —       | 24    | 10      | 15      | —        | 1122.9207                  | 62.0                  | -8                         | I                      |
| 22   | 2      | 20     | +       | 21    | 2       | 19      | +        | 1122.9658                  | 45.3                  | 0                          | I                      |
| 22   | 2      | 20     | —       | 21    | 2       | 19      | —        | 1122.9691                  | 46.2                  | -4                         | I                      |
| 23   | 5      | 19     | +       | 22    | 5       | 18      | +        | 1122.9920                  | 51.7                  | 0                          | I                      |
| 27   | 13     | 15     | —       | 26    | 13      | 14      | —        | 1122.9961                  | 46.9                  | 10                         | I                      |
| 23   | 5      | 19     | —       | 22    | 5       | 18      | —        | 1122.9961                  | 46.9                  | -3                         | I                      |
| 23   | 3      | 21     | +       | 22    | 3       | 20      | +        | 1123.0631                  | 46.2                  | -1                         | I                      |
| 23   | 3      | 21     | —       | 22    | 3       | 20      | —        | 1123.0661                  | 45.0                  | 2                          | I                      |
| 22   | 3      | 19     | +       | 21    | 3       | 18      | +        | 1123.0687                  | 44.3                  | -1                         | I                      |
| 22   | 3      | 19     | —       | 21    | 3       | 18      | —        | 1123.0761                  | 48.6                  | 0                          | I                      |
| 23   | 4      | 20     | +       | 22    | 4       | 19      | +        | 1123.1198                  | 49.4                  | -1                         | I                      |
| 23   | 4      | 20     | —       | 22    | 4       | 19      | —        | 1123.1242                  | 51.1                  | 0                          | I                      |
| 24   | 7      | 17     | +       | 23    | 7       | 16      | +        | 1123.1388                  | 48.6                  | -3                         | I                      |
| 24   | 7      | 17     | —       | 23    | 7       | 16      | —        | 1123.1423                  | 59.2                  | 0                          | I                      |
| 26   | 11     | 15     | +       | 25    | 11      | 14      | +        | 1123.1495                  | 65.0                  | 6                          | I                      |
| 26   | 11     | 15     | —       | 25    | 11      | 14      | —        | 1123.1495                  | 65.0                  | -7                         | I                      |
| 25   | 9      | 17     | +       | 24    | 9       | 16      | +        | 1123.1955                  | 64.6                  | 3                          | I                      |
| 25   | 9      | 17     | —       | 24    | 9       | 16      | —        | 1123.1976                  | 63.4                  | 1                          | I                      |
| 29   | 15     | 15     | +       | 28    | 15      | 14      | +        | 1123.2524                  | 80.3                  | 2                          | I                      |
| 36   | 22     | 14     | —       | 35    | 22      | 13      | —        | 1123.2524                  | 80.3                  | 8                          | I                      |
| 29   | 15     | 15     | —       | 28    | 15      | 14      | —        | 1123.2524                  | 80.3                  | 0                          | I                      |
| 25   | 1      | 25     | +       | 24    | 1       | 24      | +        | 1123.2896                  | 23.7                  | -1                         | I                      |
| 25   | 1      | 25     | —       | 24    | 1       | 24      | —        | 1123.2896                  | 23.7                  | 1                          | I                      |
| 24   | 1      | 23     | +       | 23    | 1       | 22      | +        | 1123.3202                  | 25.1                  | -1                         | I                      |
| 24   | 1      | 23     | —       | 23    | 1       | 22      | —        | 1123.3202                  | 25.1                  | -1                         | I                      |
| 35   | 21     | 15     | —       | 34    | 21      | 14      | —        | 1123.3348                  | 38.7                  | -4                         | II                     |
| 35   | 21     | 15     | +       | 34    | 21      | 14      | +        | 1123.3348                  | 38.7                  | 2                          | II                     |
| 30   | 16     | 14     | +       | 29    | 16      | 13      | +        | 1123.3373                  | 84.7                  | 1                          | I                      |
| 30   | 16     | 14     | —       | 29    | 16      | 13      | —        | 1123.3373                  | 84.7                  | -1                         | I                      |
| 24   | 6      | 18     | +       | 23    | 6       | 17      | +        | 1123.3494                  | 41.6                  | -2                         | I                      |
| 27   | 12     | 16     | —       | 26    | 12      | 15      | —        | 1123.3494                  | 41.6                  | -1                         | I                      |
| 24   | 6      | 18     | —       | 23    | 6       | 17      | —        | 1123.3536                  | 55.9                  | 0                          | I                      |
| 31   | 17     | 15     | —       | 30    | 17      | 14      | —        | 1123.3935                  | 88.8                  | -1                         | I                      |
| 31   | 17     | 15     | +       | 30    | 17      | 14      | +        | 1123.3935                  | 88.8                  | 2                          | I                      |
| 33   | 19     | 15     | —       | 32    | 19      | 14      | —        | 1123.4201                  | 11.9                  | -3                         | II                     |
| 33   | 19     | 15     | +       | 32    | 19      | 14      | +        | 1123.4201                  | 11.9                  | 1                          | II                     |
| 25   | 8      | 18     | +       | 24    | 8       | 17      | +        | 1123.4464                  | 62.6                  | 1                          | I                      |
| 26   | 10     | 16     | +       | 25    | 10      | 15      | +        | 1123.4496                  | 48.6                  | -4                         | I                      |
| 26   | 10     | 16     | —       | 25    | 10      | 15      | —        | 1123.4496                  | 48.6                  | -24                        | I                      |
| 25   | 8      | 18     | —       | 24    | 8       | 17      | —        | 1123.4496                  | 48.6                  | 4                          | I                      |
| 24   | 5      | 19     | +       | 23    | 5       | 18      | +        | 1123.5667                  | 51.9                  | 0                          | I                      |
| 24   | 5      | 19     | —       | 23    | 5       | 18      | —        | 1123.5720                  | 55.1                  | 0                          | I                      |
| 38   | 23     | 15     | +       | 37    | 23      | 14      | +        | 1123.6422                  | 85.7                  | 7                          | II                     |
| 29   | 14     | 16     | —       | 28    | 14      | 15      | —        | 1123.6592                  | 78.9                  | -4                         | I                      |
| 29   | 14     | 16     | +       | 28    | 14      | 15      | +        | 1123.6592                  | 78.9                  | 4                          | I                      |
| 27   | 11     | 17     | —       | 26    | 11      | 16      | —        | 1123.6757                  | 44.2                  | -16                        | I                      |
| 27   | 11     | 17     | +       | 26    | 11      | 16      | +        | 1123.6757                  | 44.2                  | 2                          | I                      |
| 25   | 7      | 19     | +       | 24    | 7       | 18      | +        | 1123.6757                  | 44.2                  | 1                          | I                      |
| 25   | 7      | 19     | —       | 24    | 7       | 18      | —        | 1123.6791                  | 58.2                  | -2                         | I                      |
| 25   | 2      | 24     | +       | 24    | 2       | 23      | +        | 1123.7276                  | 22.9                  | 3                          | I                      |
| 25   | 2      | 24     | —       | 24    | 2       | 23      | —        | 1123.7276                  | 22.9                  | -3                         | I                      |
| 26   | 9      | 17     | —       | 25    | 9       | 16      | —        | 1123.7276                  | 22.9                  | -9                         | I                      |
| 26   | 9      | 17     | +       | 25    | 9       | 16      | +        | 1123.7276                  | 22.9                  | 17                         | I                      |
| 37   | 22     | 16     | +       | 36    | 22      | 15      | +        | 1123.7542                  | 78.2                  | 6                          | II                     |
| 26   | 0      | 26     | —       | 25    | 0       | 25      | —        | 1123.7697                  | 21.6                  | 2                          | I                      |
| 26   | 0      | 26     | +       | 25    | 0       | 25      | +        | 1123.7697                  | 21.6                  | -1                         | I                      |
| 30   | 15     | 15     | +       | 29    | 15      | 14      | +        | 1123.7697                  | 21.6                  | -4                         | I                      |
| 36   | 21     | 15     | +       | 35    | 21      | 14      | +        | 1123.8396                  | 69.9                  | 5                          | II                     |
| 36   | 21     | 15     | —       | 35    | 21      | 14      | —        | 1123.8396                  | 69.9                  | -7                         | II                     |
| 31   | 16     | 16     | —       | 30    | 16      | 15      | —        | 1123.8529                  | 86.8                  | -5                         | I                      |
| 31   | 16     | 16     | +       | 30    | 16      | 15      | +        | 1123.8529                  | 86.8                  | 5                          | I                      |
| 25   | 6      | 20     | +       | 24    | 6       | 19      | +        | 1123.8870                  | 56.5                  | 0                          | I                      |
| 24   | 4      | 20     | +       | 23    | 4       | 19      | +        | 1123.8911                  | 31.7                  | 1                          | I                      |
| 25   | 6      | 20     | —       | 24    | 6       | 19      | —        | 1123.8911                  | 31.7                  | -2                         | I                      |
| 24   | 4      | 20     | —       | 23    | 4       | 19      | —        | 1123.8988                  | 51.0                  | 0                          | I                      |
| 35   | 20     | 16     | —       | 34    | 20      | 15      | —        | 1123.8988                  | 51.0                  | -1                         | I                      |
| 32   | 17     | 15     | +       | 31    | 17      | 14      | +        | 1123.9066                  | 89.3                  | 5                          | I                      |
| 32   | 17     | 15     | —       | 31    | 17      | 14      | —        | 1123.9066                  | 89.3                  | -4                         | I                      |
| 54   | 5      | 49     | +       | 54    | 5       | 50      | +        | 1123.9452                  | 43.9                  | 2                          | I                      |
| 24   | 2      | 22     | +       | 23    | 2       | 21      | +        | 1123.9452                  | 43.9                  | 2                          | I                      |
| 24   | 2      | 22     | —       | 23    | 2       | 21      | —        | 1123.9469                  | 45.5                  | -2                         | I                      |

| $N'$ | $K'_a$ | $K'_c$ | $J'^a)$ | $N''$ | $K''_a$ | $K''_c$ | $J''^b)$ | $\nu$ , exp. <sup>c)</sup> | Transm. <sup>d)</sup> | $\delta_\nu$ <sup>e)</sup> | Spectrum <sup>f)</sup> |
|------|--------|--------|---------|-------|---------|---------|----------|----------------------------|-----------------------|----------------------------|------------------------|
|      |        | 1      |         |       |         | 2       |          | 3                          | 4                     | 5                          | 6                      |
| 26   | 8      | 18     | +       | 25    | 8       | 17      | +        | 1123.9782                  | 49.4                  | -1                         | I                      |
| 26   | 8      | 18     | -       | 25    | 8       | 17      | -        | 1123.9813                  | 61.6                  | -2                         | I                      |
| 27   | 10     | 18     | -       | 26    | 10      | 17      | -        | 1123.9813                  | 61.6                  | 19                         | I                      |
| 29   | 13     | 17     | +       | 28    | 13      | 16      | +        | 1124.0392                  | 78.1                  | 7                          | I                      |
| 29   | 13     | 17     | -       | 28    | 13      | 16      | -        | 1124.0392                  | 78.1                  | -8                         | I                      |
| 25   | 3      | 23     | +       | 24    | 3       | 22      | +        | 1124.0716                  | 47.5                  | -1                         | I                      |
| 25   | 3      | 23     | -       | 24    | 3       | 22      | -        | 1124.0744                  | 44.7                  | 3                          | I                      |
| 25   | 5      | 21     | +       | 24    | 5       | 20      | +        | 1124.0762                  | 48.4                  | -4                         | I                      |
| 25   | 5      | 21     | -       | 24    | 5       | 20      | -        | 1124.0814                  | 54.8                  | 0                          | I                      |
| 43   | 26     | 18     | -       | 42    | 26      | 17      | -        | 1124.1386                  | 74.0                  | -19                        | II                     |
| 30   | 14     | 16     | -       | 29    | 14      | 15      | -        | 1124.1767                  | 79.6                  | -9                         | I                      |
| 30   | 14     | 16     | +       | 29    | 14      | 15      | +        | 1124.1767                  | 79.6                  | 5                          | I                      |
| 25   | 4      | 22     | +       | 24    | 4       | 21      | +        | 1124.1822                  | 51.4                  | -1                         | I                      |
| 25   | 4      | 22     | -       | 24    | 4       | 21      | -        | 1124.1867                  | 52.6                  | 1                          | I                      |
| 24   | 3      | 21     | +       | 23    | 3       | 20      | +        | 1124.1946                  | 48.0                  | 0                          | I                      |
| 24   | 3      | 21     | -       | 23    | 3       | 20      | -        | 1124.2014                  | 38.8                  | -1                         | I                      |
| 28   | 11     | 17     | -       | 27    | 11      | 16      | -        | 1124.2014                  | 38.8                  | 1                          | I                      |
| 26   | 7      | 19     | +       | 25    | 7       | 18      | +        | 1124.2099                  | 61.1                  | 0                          | I                      |
| 26   | 7      | 19     | -       | 25    | 7       | 18      | -        | 1124.2138                  | 62.3                  | 0                          | I                      |
| 27   | 1      | 27     | -       | 26    | 1       | 26      | -        | 1124.2429                  | 25.5                  | 1                          | I                      |
| 27   | 1      | 27     | +       | 26    | 1       | 26      | +        | 1124.2429                  | 25.5                  | -1                         | I                      |
| 26   | 1      | 25     | +       | 25    | 1       | 24      | +        | 1124.2523                  | 24.0                  | 1                          | I                      |
| 27   | 9      | 19     | +       | 26    | 9       | 18      | +        | 1124.2523                  | 24.0                  | -14                        | I                      |
| 26   | 1      | 25     | -       | 25    | 1       | 24      | -        | 1124.2523                  | 24.0                  | 1                          | I                      |
| 27   | 9      | 19     | -       | 26    | 9       | 18      | -        | 1124.2567                  | 66.3                  | 0                          | I                      |
| 31   | 15     | 17     | -       | 30    | 15      | 16      | -        | 1124.2856                  | 84.4                  | -6                         | I                      |
| 31   | 15     | 17     | +       | 30    | 15      | 16      | +        | 1124.2856                  | 84.4                  | 8                          | I                      |
| 37   | 21     | 17     | +       | 36    | 21      | 16      | +        | 1124.3409                  | 77.5                  | 5                          | II                     |
| 37   | 21     | 17     | -       | 36    | 21      | 16      | -        | 1124.3409                  | 77.5                  | -13                        | II                     |
| 32   | 16     | 16     | +       | 31    | 16      | 15      | +        | 1124.3653                  | 88.9                  | 8                          | I                      |
| 32   | 16     | 16     | -       | 31    | 16      | 15      | -        | 1124.3653                  | 88.9                  | -6                         | I                      |
| 29   | 12     | 18     | +       | 28    | 12      | 17      | +        | 1124.3924                  | 78.5                  | 4                          | I                      |
| 36   | 20     | 16     | +       | 35    | 20      | 15      | +        | 1124.4011                  | 63.6                  | 5                          | II                     |
| 26   | 6      | 20     | +       | 25    | 6       | 19      | +        | 1124.4289                  | 58.5                  | 0                          | I                      |
| 35   | 19     | 17     | +       | 34    | 19      | 16      | +        | 1124.4336                  | 55.6                  | -1                         | I                      |
| 26   | 6      | 20     | -       | 25    | 6       | 19      | -        | 1124.4336                  | 55.6                  | 1                          | I                      |
| 41   | 24     | 18     | +       | 40    | 24      | 17      | +        | 1124.4946                  | 90.6                  | 2                          | II                     |
| 28   | 10     | 18     | +       | 27    | 10      | 17      | +        | 1124.5010                  | 71.5                  | 0                          | I                      |
| 28   | 10     | 18     | -       | 27    | 10      | 17      | -        | 1124.5038                  | 72.5                  | 0                          | I                      |
| 27   | 8      | 20     | +       | 26    | 8       | 19      | +        | 1124.5073                  | 64.5                  | 0                          | I                      |
| 27   | 8      | 20     | -       | 26    | 8       | 19      | -        | 1124.5110                  | 66.0                  | 0                          | I                      |
| 30   | 13     | 17     | +       | 29    | 13      | 16      | +        | 1124.5562                  | 81.7                  | 4                          | I                      |
| 26   | 5      | 21     | +       | 25    | 5       | 20      | +        | 1124.6740                  | 54.4                  | 0                          | I                      |
| 26   | 5      | 21     | -       | 25    | 5       | 20      | -        | 1124.6795                  | 21.6                  | -6                         | I                      |
| 27   | 2      | 26     | -       | 26    | 2       | 25      | -        | 1124.6795                  | 21.6                  | 0                          | I                      |
| 27   | 2      | 26     | +       | 26    | 2       | 25      | +        | 1124.6795                  | 21.6                  | 5                          | I                      |
| 31   | 14     | 18     | +       | 30    | 14      | 17      | +        | 1124.6909                  | 84.9                  | 3                          | I                      |
| 28   | 0      | 28     | -       | 27    | 0       | 27      | -        | 1124.7161                  | 26.4                  | 1                          | I                      |
| 28   | 0      | 28     | +       | 27    | 0       | 27      | +        | 1124.7161                  | 26.4                  | -1                         | I                      |
| 29   | 11     | 19     | +       | 28    | 11      | 18      | +        | 1124.7195                  | 72.5                  | -1                         | I                      |
| 29   | 11     | 19     | -       | 28    | 11      | 18      | -        | 1124.7220                  | 76.0                  | -1                         | I                      |
| 27   | 7      | 21     | +       | 26    | 7       | 20      | +        | 1124.7410                  | 62.9                  | 0                          | I                      |
| 27   | 7      | 21     | -       | 26    | 7       | 20      | -        | 1124.7452                  | 63.8                  | 0                          | I                      |
| 28   | 9      | 19     | +       | 27    | 9       | 18      | +        | 1124.7786                  | 70.5                  | 0                          | I                      |
| 28   | 9      | 19     | -       | 27    | 9       | 18      | -        | 1124.7819                  | 70.4                  | 0                          | I                      |
| 32   | 15     | 17     | +       | 31    | 15      | 16      | +        | 1124.7969                  | 88.4                  | 5                          | I                      |
| 32   | 15     | 17     | -       | 31    | 15      | 16      | -        | 1124.7980                  | 88.4                  | -2                         | I                      |
| 43   | 25     | 19     | +       | 42    | 25      | 18      | +        | 1124.8182                  | 96.4                  | -2                         | II                     |
| 38   | 21     | 17     | +       | 37    | 21      | 16      | +        | 1124.8382                  | 57.1                  | -4                         | II                     |
| 26   | 2      | 24     | +       | 25    | 2       | 23      | +        | 1124.8787                  | 36.7                  | 5                          | I                      |
| 26   | 2      | 24     | -       | 25    | 2       | 23      | -        | 1124.8787                  | 36.7                  | -7                         | I                      |
| 37   | 20     | 18     | +       | 36    | 20      | 17      | +        | 1124.9006                  | 72.1                  | 0                          | II                     |
| 30   | 12     | 18     | +       | 29    | 12      | 17      | +        | 1124.9093                  | 80.8                  | 1                          | I                      |
| 30   | 12     | 18     | -       | 29    | 12      | 17      | -        | 1124.9116                  | 80.6                  | -1                         | I                      |
| 34   | 17     | 17     | -       | 33    | 17      | 16      | -        | 1124.9229                  | 40.5                  | -12                        | II                     |
| 36   | 19     | 17     | +       | 35    | 19      | 16      | +        | 1124.9354                  | 64.7                  | 0                          | II                     |
| 27   | 6      | 22     | +       | 26    | 6       | 21      | +        | 1124.9584                  | 59.3                  | 0                          | I                      |
| 27   | 6      | 22     | -       | 26    | 6       | 21      | -        | 1124.9632                  | 60.4                  | 0                          | I                      |
| 42   | 24     | 18     | +       | 41    | 24      | 17      | +        | 1124.9853                  | 94.3                  | 1                          | II                     |
| 42   | 24     | 18     | -       | 41    | 24      | 17      | -        | 1124.9883                  | 94.3                  | -1                         | II                     |
| 29   | 10     | 20     | +       | 28    | 10      | 19      | +        | 1125.0220                  | 72.9                  | 0                          | I                      |
| 29   | 10     | 20     | -       | 28    | 10      | 19      | -        | 1125.0250                  | 74.0                  | 0                          | I                      |

| $N'$ | $K'_a$ | $K'_c$ | $J'^a)$ | $N''$ | $K''_a$ | $K''_c$ | $J''^b)$ | $\nu$ , exp. <sup>c)</sup> | Transm. <sup>d)</sup> | $\delta_\nu$ <sup>e)</sup> | Spectrum <sup>f)</sup> |
|------|--------|--------|---------|-------|---------|---------|----------|----------------------------|-----------------------|----------------------------|------------------------|
|      |        | 1      |         |       |         | 2       |          | 3                          | 4                     | 5                          | 6                      |
| 28   | 8      | 20     | +       | 27    | 8       | 19      | +        | 1125.0337                  | 65.4                  | 0                          | I                      |
| 28   | 8      | 20     | -       | 27    | 8       | 19      | -        | 1125.0376                  | 67.1                  | 1                          | I                      |
| 27   | 3      | 25     | +       | 26    | 3       | 24      | +        | 1125.0543                  | 47.4                  | 0                          | I                      |
| 27   | 3      | 25     | -       | 26    | 3       | 24      | -        | 1125.0569                  | 31.9                  | 5                          | I                      |
| 26   | 4      | 22     | +       | 25    | 4       | 21      | +        | 1125.0569                  | 31.9                  | -5                         | I                      |
| 26   | 4      | 22     | -       | 25    | 4       | 21      | -        | 1125.0659                  | 53.6                  | 0                          | I                      |
| 31   | 13     | 19     | +       | 30    | 13      | 18      | +        | 1125.0700                  | 82.6                  | 1                          | I                      |
| 31   | 13     | 19     | -       | 30    | 13      | 18      | -        | 1125.0720                  | 83.6                  | -2                         | I                      |
| 41   | 23     | 19     | -       | 40    | 23      | 18      | -        | 1125.1299                  | 90.5                  | -2                         | II                     |
| 27   | 5      | 23     | +       | 26    | 5       | 22      | +        | 1125.1478                  | 57.6                  | 3                          | I                      |
| 27   | 5      | 23     | -       | 26    | 5       | 22      | -        | 1125.1525                  | 57.5                  | 1                          | I                      |
| 28   | 1      | 27     | +       | 27    | 1       | 26      | +        | 1125.1774                  | 29.5                  | 0                          | I                      |
| 28   | 1      | 27     | -       | 27    | 1       | 26      | -        | 1125.1774                  | 29.5                  | 0                          | I                      |
| 29   | 1      | 29     | -       | 28    | 1       | 28      | -        | 1125.1842                  | 27.5                  | 1                          | I                      |
| 29   | 1      | 29     | +       | 28    | 1       | 28      | +        | 1125.1842                  | 27.5                  | -1                         | I                      |
| 32   | 14     | 18     | +       | 31    | 14      | 17      | +        | 1125.2019                  | 87.1                  | 3                          | I                      |
| 32   | 14     | 18     | -       | 31    | 14      | 17      | -        | 1125.2019                  | 88.1                  | -21                        | I                      |
| 27   | 4      | 24     | +       | 26    | 4       | 23      | +        | 1125.2209                  | 54.1                  | -1                         | I                      |
| 27   | 4      | 24     | -       | 26    | 4       | 23      | -        | 1125.2253                  | 55.2                  | 1                          | I                      |
| 30   | 11     | 19     | +       | 29    | 11      | 18      | +        | 1125.2371                  | 76.3                  | 2                          | I                      |
| 30   | 11     | 19     | -       | 29    | 11      | 18      | -        | 1125.2398                  | 76.5                  | -1                         | I                      |
| 28   | 7      | 21     | +       | 27    | 7       | 20      | +        | 1125.2704                  | 61.7                  | 1                          | I                      |
| 28   | 7      | 21     | -       | 27    | 7       | 20      | -        | 1125.2738                  | 40.4                  | -9                         | I                      |
| 26   | 3      | 23     | +       | 25    | 3       | 22      | +        | 1125.2738                  | 40.4                  | 3                          | I                      |
| 26   | 3      | 23     | -       | 25    | 3       | 22      | -        | 1125.2795                  | 51.5                  | -1                         | I                      |
| 29   | 9      | 21     | +       | 28    | 9       | 20      | +        | 1125.3004                  | 70.7                  | 0                          | I                      |
| 29   | 9      | 21     | -       | 28    | 9       | 20      | -        | 1125.3042                  | 66.0                  | 2                          | I                      |
| 33   | 15     | 19     | +       | 32    | 15      | 18      | +        | 1125.3042                  | 66.0                  | -5                         | I                      |
| 33   | 15     | 19     | -       | 32    | 15      | 18      | -        | 1125.3067                  | 13.1                  | -3                         | II                     |
| 39   | 21     | 19     | +       | 38    | 21      | 18      | +        | 1125.3335                  | 83.1                  | -2                         | II                     |
| 39   | 21     | 19     | -       | 38    | 21      | 18      | -        | 1125.3361                  | 83.3                  | -4                         | II                     |
| 34   | 16     | 18     | +       | 33    | 16      | 17      | +        | 1125.3794                  | 29.7                  | 2                          | II                     |
| 34   | 16     | 18     | -       | 33    | 16      | 17      | -        | 1125.3816                  | 32.7                  | 0                          | II                     |
| 38   | 20     | 18     | +       | 37    | 20      | 17      | +        | 1125.3971                  | 74.1                  | -4                         | II                     |
| 31   | 12     | 20     | +       | 30    | 12      | 19      | +        | 1125.4233                  | 81.0                  | 1                          | I                      |
| 31   | 12     | 20     | -       | 30    | 12      | 19      | -        | 1125.4261                  | 78.7                  | 0                          | I                      |
| 37   | 19     | 19     | +       | 36    | 19      | 18      | +        | 1125.4340                  | 67.8                  | -3                         | II                     |
| 43   | 24     | 20     | -       | 42    | 24      | 19      | -        | 1125.4764                  | 94.2                  | -2                         | II                     |
| 28   | 6      | 22     | +       | 27    | 6       | 21      | +        | 1125.5008                  | 61.1                  | 0                          | I                      |
| 28   | 6      | 22     | -       | 27    | 6       | 21      | -        | 1125.5062                  | 61.9                  | 0                          | I                      |
| 30   | 10     | 20     | +       | 29    | 10      | 19      | +        | 1125.5399                  | 75.0                  | 0                          | I                      |
| 30   | 10     | 20     | -       | 29    | 10      | 19      | -        | 1125.5433                  | 75.1                  | 1                          | I                      |
| 29   | 8      | 22     | +       | 28    | 8       | 21      | +        | 1125.5571                  | 67.9                  | 0                          | I                      |
| 29   | 8      | 22     | -       | 28    | 8       | 21      | -        | 1125.5613                  | 68.7                  | 0                          | I                      |
| 32   | 13     | 19     | +       | 31    | 13      | 18      | +        | 1125.5810                  | 85.9                  | 1                          | I                      |
| 32   | 13     | 19     | -       | 31    | 13      | 18      | -        | 1125.5833                  | 85.4                  | -3                         | I                      |
| 29   | 2      | 28     | +       | 28    | 2       | 27      | +        | 1125.6155                  | 33.9                  | 1                          | I                      |
| 29   | 2      | 28     | -       | 28    | 2       | 27      | -        | 1125.6155                  | 33.9                  | -2                         | I                      |
| 30   | 0      | 30     | -       | 29    | 0       | 29      | -        | 1125.6508                  | 30.2                  | 2                          | I                      |
| 30   | 0      | 30     | +       | 29    | 0       | 29      | +        | 1125.6508                  | 30.2                  | -1                         | I                      |
| 33   | 14     | 20     | +       | 32    | 14      | 19      | +        | 1125.7098                  | 88.9                  | 1                          | I                      |
| 33   | 14     | 20     | -       | 32    | 14      | 19      | -        | 1125.7123                  | 88.8                  | -1                         | I                      |
| 41   | 22     | 20     | +       | 40    | 22      | 19      | +        | 1125.7336                  | 87.8                  | -2                         | II                     |
| 41   | 22     | 20     | -       | 40    | 22      | 19      | -        | 1125.7367                  | 88.0                  | -4                         | II                     |
| 31   | 11     | 21     | +       | 30    | 11      | 20      | +        | 1125.7513                  | 79.3                  | 1                          | I                      |
| 31   | 11     | 21     | -       | 30    | 11      | 20      | -        | 1125.7545                  | 79.5                  | 0                          | I                      |
| 28   | 2      | 26     | +       | 27    | 2       | 25      | +        | 1125.7776                  | 34.8                  | 3                          | I                      |
| 28   | 2      | 26     | -       | 27    | 2       | 25      | -        | 1125.7776                  | 34.8                  | -3                         | I                      |
| 28   | 5      | 23     | +       | 27    | 5       | 22      | +        | 1125.7856                  | 57.8                  | -1                         | I                      |
| 28   | 5      | 23     | -       | 27    | 5       | 22      | -        | 1125.7929                  | 57.6                  | 1                          | I                      |
| 29   | 7      | 23     | +       | 28    | 7       | 22      | +        | 1125.7956                  | 63.3                  | -1                         | I                      |
| 29   | 7      | 23     | -       | 28    | 7       | 22      | -        | 1125.8005                  | 66.1                  | 1                          | I                      |
| 34   | 15     | 19     | +       | 33    | 15      | 18      | +        | 1125.8100                  | 28.3                  | 1                          | II                     |
| 34   | 15     | 19     | -       | 33    | 15      | 18      | -        | 1125.8125                  | 27.5                  | -1                         | II                     |
| 30   | 9      | 21     | +       | 29    | 9       | 20      | +        | 1125.8193                  | 70.1                  | -1                         | I                      |
| 30   | 9      | 21     | -       | 29    | 9       | 20      | -        | 1125.8233                  | 72.8                  | 1                          | I                      |
| 35   | 16     | 20     | +       | 34    | 16      | 19      | +        | 1125.8820                  | 39.8                  | 2                          | II                     |
| 35   | 16     | 20     | -       | 34    | 16      | 19      | -        | 1125.8845                  | 39.4                  | 0                          | II                     |
| 38   | 19     | 19     | +       | 37    | 19      | 18      | +        | 1125.9289                  | 37.0                  | -10                        | II                     |
| 32   | 12     | 20     | +       | 31    | 12      | 19      | +        | 1125.9342                  | 83.6                  | 1                          | I                      |
| 32   | 12     | 20     | -       | 31    | 12      | 19      | -        | 1125.9374                  | 82.7                  | 1                          | I                      |
| 49   | 5      | 45     | +       | 49    | 3       | 46      | +        | 1125.9899                  | 95.2                  | -4                         | II                     |



| $N'$ | $K'_a$ | $K'_c$ | $J'^a)$ | $N''$ | $K''_a$ | $K''_c$ | $J''^b)$ | $\nu$ , exp. <sup>c)</sup> | Transm. <sup>d)</sup> | $\delta_\nu$ <sup>e)</sup> | Spectrum <sup>f)</sup> |
|------|--------|--------|---------|-------|---------|---------|----------|----------------------------|-----------------------|----------------------------|------------------------|
|      |        | 1      |         |       |         | 2       |          | 3                          | 4                     | 5                          | 6                      |
| 29   | 3      | 27     | +       | 28    | 3       | 26      | +        | 1126.0125                  | 50.3                  | 0                          | I                      |
| 29   | 3      | 27     | -       | 28    | 3       | 26      | -        | 1126.0141                  | 50.7                  | 0                          | I                      |
| 29   | 6      | 24     | +       | 28    | 6       | 23      | +        | 1126.0190                  | 60.6                  | -1                         | I                      |
| 29   | 6      | 24     | -       | 28    | 6       | 23      | -        | 1126.0243                  | 62.6                  | 1                          | I                      |
| 31   | 10     | 22     | +       | 30    | 10      | 21      | +        | 1126.0548                  | 76.7                  | 0                          | I                      |
| 31   | 10     | 22     | -       | 30    | 10      | 21      | -        | 1126.0585                  | 76.2                  | 0                          | I                      |
| 30   | 8      | 22     | +       | 29    | 8       | 21      | +        | 1126.0778                  | 68.8                  | 0                          | I                      |
| 30   | 8      | 22     | -       | 29    | 8       | 21      | -        | 1126.0823                  | 69.2                  | 0                          | I                      |
| 33   | 13     | 21     | +       | 32    | 13      | 20      | +        | 1126.0885                  | 13.4                  | 0                          | II                     |
| 30   | 1      | 29     | +       | 29    | 1       | 28      | +        | 1126.0947                  | 33.8                  | 0                          | I                      |
| 30   | 1      | 29     | -       | 29    | 1       | 28      | -        | 1126.0947                  | 33.8                  | -1                         | I                      |
| 43   | 23     | 21     | +       | 42    | 23      | 20      | +        | 1126.1015                  | 84.1                  | -4                         | II                     |
| 61   | 7      | 55     | +       | 61    | 5       | 56      | +        | 1126.1054                  | 85.9                  | 5                          | II                     |
| 43   | 23     | 21     | -       | 42    | 23      | 20      | -        | 1126.1054                  | 85.9                  | -4                         | II                     |
| 31   | 1      | 31     | -       | 30    | 1       | 30      | -        | 1126.1134                  | 31.4                  | 1                          | I                      |
| 31   | 1      | 31     | +       | 30    | 1       | 30      | +        | 1126.1134                  | 31.4                  | -1                         | I                      |
| 55   | 6      | 50     | -       | 55    | 4       | 51      | -        | 1126.1245                  | 80.3                  | 10                         | II                     |
| 29   | 5      | 25     | +       | 28    | 5       | 24      | +        | 1126.2017                  | 59.0                  | -1                         | I                      |
| 29   | 5      | 25     | -       | 28    | 5       | 24      | -        | 1126.2071                  | 58.8                  | 1                          | I                      |
| 28   | 4      | 24     | +       | 27    | 4       | 23      | +        | 1126.2110                  | 54.0                  | 0                          | I                      |
| 34   | 14     | 20     | +       | 33    | 14      | 19      | +        | 1126.2144                  | 83.4                  | -1                         | I                      |
| 28   | 4      | 24     | -       | 27    | 4       | 23      | -        | 1126.2198                  | 55.7                  | -1                         | I                      |
| 29   | 4      | 26     | +       | 28    | 4       | 25      | +        | 1126.2336                  | 56.9                  | -2                         | I                      |
| 29   | 4      | 26     | -       | 28    | 4       | 25      | -        | 1126.2378                  | 56.8                  | 1                          | I                      |
| 32   | 11     | 21     | +       | 31    | 11      | 20      | +        | 1126.2625                  | 80.6                  | 0                          | I                      |
| 32   | 11     | 21     | -       | 31    | 11      | 20      | -        | 1126.2661                  | 81.2                  | 0                          | I                      |
| 28   | 3      | 25     | +       | 27    | 3       | 24      | +        | 1126.3000                  | 53.7                  | 0                          | I                      |
| 28   | 3      | 25     | -       | 27    | 3       | 24      | -        | 1126.3045                  | 55.2                  | -4                         | I                      |
| 35   | 15     | 21     | +       | 34    | 15      | 20      | +        | 1126.3120                  | 29.5                  | 1                          | II                     |
| 58   | 5      | 53     | -       | 58    | 5       | 54      | -        | 1126.3120                  | 29.5                  | -1                         | II                     |
| 35   | 15     | 21     | -       | 34    | 15      | 20      | -        | 1126.3149                  | 19.1                  | -1                         | II                     |
| 41   | 21     | 21     | +       | 40    | 21      | 20      | +        | 1126.3149                  | 19.1                  | 6                          | II                     |
| 30   | 7      | 23     | +       | 29    | 7       | 22      | +        | 1126.3207                  | 66.1                  | 0                          | I                      |
| 30   | 7      | 23     | -       | 29    | 7       | 22      | -        | 1126.3257                  | 65.9                  | 0                          | I                      |
| 31   | 9      | 23     | +       | 30    | 9       | 22      | +        | 1126.3354                  | 72.8                  | 0                          | I                      |
| 31   | 9      | 23     | -       | 30    | 9       | 22      | -        | 1126.3395                  | 73.5                  | 0                          | I                      |
| 36   | 16     | 20     | +       | 35    | 16      | 19      | +        | 1126.3813                  | 33.0                  | 1                          | II                     |
| 36   | 16     | 20     | -       | 35    | 16      | 19      | -        | 1126.3844                  | 28.1                  | 1                          | II                     |
| 39   | 19     | 21     | -       | 38    | 19      | 20      | -        | 1126.4258                  | 46.9                  | 1                          | II                     |
| 33   | 12     | 22     | +       | 32    | 12      | 21      | +        | 1126.4420                  | 84.2                  | 0                          | I                      |
| 33   | 12     | 22     | -       | 32    | 12      | 21      | -        | 1126.4454                  | 84.5                  | -1                         | I                      |
| 40   | 2      | 38     | +       | 40    | 2       | 39      | +        | 1126.4967                  | 98.3                  | -7                         | I                      |
| 31   | 2      | 30     | +       | 30    | 2       | 29      | +        | 1126.5375                  | 37.5                  | 1                          | I                      |
| 31   | 2      | 30     | -       | 30    | 2       | 29      | -        | 1126.5375                  | 37.5                  | -1                         | I                      |
| 32   | 10     | 22     | -       | 31    | 10      | 21      | -        | 1126.5670                  | 51.2                  | -36                        | I                      |
| 30   | 6      | 24     | +       | 29    | 6       | 23      | +        | 1126.5670                  | 51.2                  | -3                         | I                      |
| 32   | 10     | 22     | +       | 31    | 10      | 21      | +        | 1126.5670                  | 51.2                  | 4                          | I                      |
| 32   | 0      | 32     | +       | 31    | 0       | 31      | +        | 1126.5736                  | 23.2                  | -3                         | I                      |
| 32   | 0      | 32     | -       | 31    | 0       | 31      | -        | 1126.5736                  | 23.2                  | 0                          | I                      |
| 30   | 6      | 24     | -       | 29    | 6       | 23      | -        | 1126.5736                  | 23.2                  | 4                          | I                      |
| 31   | 8      | 24     | +       | 30    | 8       | 23      | +        | 1126.5958                  | 64.2                  | 1                          | I                      |
| 31   | 8      | 24     | -       | 30    | 8       | 23      | -        | 1126.6003                  | 71.0                  | 0                          | I                      |
| 30   | 2      | 28     | -       | 29    | 2       | 27      | -        | 1126.6566                  | 36.4                  | -2                         | I                      |
| 30   | 2      | 28     | +       | 29    | 2       | 27      | +        | 1126.6566                  | 36.4                  | 1                          | I                      |
| 35   | 14     | 22     | +       | 34    | 14      | 21      | +        | 1126.7160                  | 90.6                  | 0                          | I                      |
| 35   | 14     | 22     | -       | 34    | 14      | 21      | -        | 1126.7194                  | 90.5                  | -1                         | I                      |
| 52   | 4      | 48     | +       | 52    | 4       | 49      | +        | 1126.7613                  | 90.8                  | -2                         | II                     |
| 33   | 11     | 23     | +       | 32    | 11      | 22      | +        | 1126.7706                  | 81.8                  | 0                          | I                      |
| 33   | 11     | 23     | -       | 32    | 11      | 22      | -        | 1126.7745                  | 81.6                  | 0                          | I                      |
| 36   | 1      | 35     | -       | 36    | 1       | 36      | -        | 1126.7807                  | 98.2                  | -10                        | I                      |
| 36   | 15     | 21     | +       | 35    | 15      | 20      | +        | 1126.8108                  | 32.8                  | 1                          | II                     |
| 52   | 4      | 48     | -       | 52    | 4       | 49      | -        | 1126.8108                  | 32.8                  | -2                         | II                     |
| 36   | 15     | 21     | -       | 35    | 15      | 20      | -        | 1126.8141                  | 32.6                  | -1                         | II                     |
| 31   | 7      | 25     | +       | 30    | 7       | 24      | +        | 1126.8399                  | 68.0                  | 0                          | I                      |
| 31   | 7      | 25     | -       | 30    | 7       | 24      | -        | 1126.8451                  | 67.4                  | 1                          | I                      |
| 32   | 9      | 23     | +       | 31    | 9       | 22      | +        | 1126.8484                  | 72.6                  | -1                         | I                      |
| 32   | 9      | 23     | -       | 31    | 9       | 22      | -        | 1126.8528                  | 73.4                  | 0                          | I                      |
| 41   | 20     | 22     | +       | 40    | 20      | 21      | +        | 1126.8688                  | 66.7                  | -1                         | II                     |
| 37   | 16     | 22     | +       | 36    | 16      | 21      | +        | 1126.8776                  | 93.5                  | 3                          | I                      |
| 37   | 16     | 22     | -       | 36    | 16      | 21      | -        | 1126.8808                  | 94.2                  | 0                          | I                      |
| 30   | 5      | 25     | +       | 29    | 5       | 24      | +        | 1126.9049                  | 61.4                  | 0                          | I                      |
| 30   | 5      | 25     | -       | 29    | 5       | 24      | -        | 1126.9131                  | 62.3                  | 0                          | I                      |

| $N'$ | $K'_a$ | $K'_c$ | $J'^a)$ | $N''$ | $K''_a$ | $K''_c$ | $J''^b)$ | $\nu$ , exp. <sup>c)</sup> | Transm. <sup>d)</sup> | $\delta_\nu$ <sup>e)</sup> | Spectrum <sup>f)</sup> |
|------|--------|--------|---------|-------|---------|---------|----------|----------------------------|-----------------------|----------------------------|------------------------|
|      |        | 1      |         |       |         | 2       |          | 3                          | 4                     | 5                          | 6                      |
| 39   | 18     | 22     | +       | 38    | 18      | 21      | +        | 1126.9269                  | 62.6                  | -5                         | II                     |
| 39   | 18     | 22     | -       | 38    | 18      | 21      | -        | 1126.9313                  | 97.1                  | 1                          | II                     |
| 31   | 3      | 29     | +       | 30    | 3       | 28      | +        | 1126.9477                  | 48.5                  | -1                         | I                      |
| 31   | 3      | 29     | -       | 30    | 3       | 28      | -        | 1126.9477                  | 48.5                  | -16                        | I                      |
| 32   | 1      | 31     | -       | 31    | 1       | 30      | -        | 1127.0029                  | 38.0                  | -1                         | I                      |
| 32   | 1      | 31     | +       | 31    | 1       | 30      | +        | 1127.0029                  | 38.0                  | 0                          | I                      |
| 33   | 1      | 33     | +       | 32    | 1       | 32      | +        | 1127.0306                  | 35.3                  | -1                         | I                      |
| 33   | 1      | 33     | -       | 32    | 1       | 32      | -        | 1127.0306                  | 35.3                  | 1                          | I                      |
| 31   | 6      | 26     | +       | 30    | 6       | 25      | +        | 1127.0682                  | 65.5                  | 0                          | I                      |
| 31   | 6      | 26     | -       | 30    | 6       | 25      | -        | 1127.0741                  | 60.7                  | 3                          | I                      |
| 33   | 10     | 24     | -       | 32    | 10      | 23      | -        | 1127.0797                  | 78.5                  | 0                          | I                      |
| 35   | 13     | 23     | +       | 34    | 13      | 22      | +        | 1127.0946                  | 87.6                  | 1                          | I                      |
| 35   | 13     | 23     | -       | 34    | 13      | 22      | -        | 1127.0984                  | 88.5                  | 0                          | I                      |
| 32   | 8      | 24     | +       | 31    | 8       | 23      | +        | 1127.1109                  | 71.8                  | 0                          | I                      |
| 32   | 8      | 24     | -       | 31    | 8       | 23      | -        | 1127.1158                  | 72.7                  | 0                          | I                      |
| 36   | 14     | 22     | +       | 35    | 14      | 21      | +        | 1127.2145                  | 88.8                  | 1                          | I                      |
| 31   | 4      | 28     | +       | 30    | 4       | 27      | +        | 1127.2189                  | 57.1                  | -3                         | I                      |
| 36   | 14     | 22     | -       | 35    | 14      | 21      | -        | 1127.2189                  | 57.1                  | 7                          | I                      |
| 31   | 4      | 28     | -       | 30    | 4       | 27      | -        | 1127.2229                  | 60.4                  | 1                          | I                      |
| 31   | 5      | 27     | +       | 30    | 5       | 26      | +        | 1127.2370                  | 62.3                  | -1                         | I                      |
| 31   | 5      | 27     | -       | 30    | 5       | 26      | -        | 1127.2425                  | 63.3                  | 1                          | I                      |
| 60   | 5      | 55     | +       | 60    | 5       | 56      | +        | 1127.2480                  | 80.0                  | 13                         | II                     |
| 30   | 3      | 27     | +       | 29    | 3       | 26      | +        | 1127.2709                  | 57.3                  | -1                         | I                      |
| 30   | 3      | 27     | -       | 29    | 3       | 26      | -        | 1127.2749                  | 51.2                  | 1                          | I                      |
| 34   | 11     | 23     | +       | 33    | 11      | 22      | +        | 1127.2749                  | 51.2                  | -7                         | I                      |
| 34   | 11     | 23     | -       | 33    | 11      | 22      | -        | 1127.2797                  | 81.1                  | 0                          | I                      |
| 37   | 15     | 23     | +       | 36    | 15      | 22      | +        | 1127.3065                  | 93.2                  | 2                          | I                      |
| 37   | 15     | 23     | -       | 36    | 15      | 22      | -        | 1127.3101                  | 93.1                  | 0                          | I                      |
| 30   | 4      | 26     | +       | 29    | 4       | 25      | +        | 1127.3355                  | 59.1                  | 0                          | I                      |
| 30   | 4      | 26     | -       | 29    | 4       | 25      | -        | 1127.3440                  | 60.2                  | -1                         | I                      |
| 33   | 9      | 25     | +       | 32    | 9       | 24      | +        | 1127.3587                  | 73.9                  | 1                          | I                      |
| 33   | 9      | 25     | -       | 32    | 9       | 24      | -        | 1127.3619                  | 62.8                  | -13                        | I                      |
| 32   | 7      | 25     | +       | 31    | 7       | 24      | +        | 1127.3619                  | 62.8                  | 3                          | I                      |
| 32   | 7      | 25     | -       | 31    | 7       | 24      | -        | 1127.3671                  | 69.4                  | 0                          | I                      |
| 38   | 16     | 22     | +       | 37    | 16      | 21      | +        | 1127.3703                  | 41.7                  | 1                          | II                     |
| 38   | 16     | 22     | -       | 37    | 16      | 21      | -        | 1127.3742                  | 41.1                  | 1                          | II                     |
| 39   | 17     | 23     | -       | 38    | 17      | 22      | -        | 1127.4106                  | 34.2                  | 1                          | II                     |
| 42   | 2      | 40     | -       | 42    | 2       | 41      | -        | 1127.4319                  | 96.0                  | 6                          | I                      |
| 33   | 2      | 32     | -       | 32    | 2       | 31      | -        | 1127.4462                  | 39.7                  | 0                          | I                      |
| 33   | 2      | 32     | +       | 32    | 2       | 31      | +        | 1127.4462                  | 39.7                  | 1                          | I                      |
| 35   | 12     | 24     | -       | 34    | 12      | 23      | -        | 1127.4521                  | 85.5                  | -1                         | I                      |
| 34   | 0      | 34     | -       | 33    | 0       | 33      | -        | 1127.4848                  | 36.2                  | 1                          | I                      |
| 34   | 0      | 34     | +       | 33    | 0       | 33      | +        | 1127.4848                  | 36.2                  | -1                         | I                      |
| 32   | 2      | 30     | -       | 31    | 2       | 29      | -        | 1127.5256                  | 42.0                  | -2                         | I                      |
| 32   | 2      | 30     | +       | 31    | 2       | 29      | +        | 1127.5256                  | 42.0                  | 1                          | I                      |
| 34   | 10     | 24     | +       | 33    | 10      | 23      | +        | 1127.5813                  | 79.8                  | 0                          | I                      |
| 34   | 10     | 24     | -       | 33    | 10      | 23      | -        | 1127.5858                  | 79.9                  | 0                          | I                      |
| 36   | 13     | 23     | +       | 35    | 13      | 22      | +        | 1127.5928                  | 88.5                  | 0                          | I                      |
| 36   | 13     | 23     | -       | 35    | 13      | 22      | -        | 1127.5969                  | 89.1                  | 0                          | I                      |
| 33   | 8      | 26     | +       | 32    | 8       | 25      | +        | 1127.6231                  | 73.3                  | 0                          | I                      |
| 33   | 8      | 26     | -       | 32    | 8       | 25      | -        | 1127.6284                  | 70.9                  | 3                          | I                      |
| 32   | 6      | 26     | +       | 31    | 6       | 25      | +        | 1127.6308                  | 65.6                  | -1                         | I                      |
| 38   | 1      | 37     | +       | 38    | 1       | 38      | +        | 1127.6308                  | 65.6                  | -3                         | I                      |
| 32   | 6      | 26     | -       | 31    | 6       | 25      | -        | 1127.6375                  | 67.9                  | 0                          | I                      |
| 54   | 4      | 50     | +       | 54    | 4       | 51      | +        | 1127.6755                  | 83.0                  | 7                          | II                     |
| 37   | 14     | 24     | +       | 36    | 14      | 23      | +        | 1127.7097                  | 91.6                  | 0                          | I                      |
| 37   | 14     | 24     | -       | 36    | 14      | 23      | -        | 1127.7137                  | 92.0                  | -1                         | I                      |
| 54   | 4      | 50     | -       | 54    | 4       | 51      | -        | 1127.7243                  | 97.4                  | 12                         | II                     |
| 35   | 11     | 25     | +       | 34    | 11      | 24      | +        | 1127.7776                  | 83.4                  | 1                          | I                      |
| 35   | 11     | 25     | -       | 34    | 11      | 24      | -        | 1127.7818                  | 83.7                  | -1                         | I                      |
| 38   | 15     | 23     | +       | 37    | 15      | 22      | +        | 1127.7987                  | 36.3                  | 0                          | II                     |
| 38   | 15     | 23     | -       | 37    | 15      | 22      | -        | 1127.8027                  | 38.9                  | 0                          | II                     |
| 43   | 20     | 24     | -       | 42    | 20      | 23      | -        | 1127.8381                  | 56.7                  | -4                         | II                     |
| 34   | 9      | 25     | +       | 33    | 9       | 24      | +        | 1127.8637                  | 51.0                  | -21                        | I                      |
| 39   | 16     | 24     | -       | 38    | 16      | 23      | -        | 1127.8637                  | 51.0                  | 7                          | I                      |
| 33   | 3      | 31     | -       | 32    | 3       | 30      | -        | 1127.8637                  | 51.0                  | 0                          | I                      |
| 33   | 3      | 31     | +       | 32    | 3       | 30      | +        | 1127.8637                  | 51.0                  | 12                         | I                      |
| 34   | 9      | 25     | -       | 33    | 9       | 24      | -        | 1127.8709                  | 74.9                  | 2                          | I                      |
| 33   | 7      | 27     | +       | 32    | 7       | 26      | +        | 1127.8734                  | 69.1                  | -1                         | I                      |
| 33   | 7      | 27     | -       | 32    | 7       | 26      | -        | 1127.8791                  | 70.5                  | 1                          | I                      |
| 34   | 1      | 33     | -       | 33    | 1       | 32      | -        | 1127.9009                  | 42.0                  | -1                         | I                      |
| 34   | 1      | 33     | +       | 33    | 1       | 32      | +        | 1127.9009                  | 42.0                  | 0                          | I                      |

| $N'$ | $K'_a$ | $K'_c$ | $J'^a)$ | $N''$ | $K''_a$ | $K''_c$ | $J''^b)$ | $\nu$ , exp. <sup>c)</sup> | Transm. <sup>d)</sup> | $\delta_\nu$ <sup>e)</sup> | Spectrum <sup>f)</sup> |
|------|--------|--------|---------|-------|---------|---------|----------|----------------------------|-----------------------|----------------------------|------------------------|
|      |        | 1      |         |       |         | 2       |          | 3                          | 4                     | 5                          | 6                      |
| 35   | 1      | 35     | +       | 34    | 1       | 34      | +        | 1127.9358                  | 39.2                  | -1                         | I                      |
| 35   | 1      | 35     | -       | 34    | 1       | 34      | -        | 1127.9358                  | 39.2                  | 1                          | I                      |
| 36   | 12     | 24     | +       | 35    | 12      | 23      | +        | 1127.9464                  | 86.5                  | -1                         | I                      |
| 36   | 12     | 24     | -       | 35    | 12      | 23      | -        | 1127.9508                  | 87.5                  | 0                          | I                      |
| 32   | 5      | 27     | +       | 31    | 5       | 26      | +        | 1128.0313                  | 64.7                  | 0                          | I                      |
| 32   | 5      | 27     | -       | 31    | 5       | 26      | -        | 1128.0403                  | 65.8                  | -1                         | I                      |
| 35   | 10     | 26     | +       | 34    | 10      | 25      | +        | 1128.0841                  | 80.9                  | 0                          | I                      |
| 35   | 10     | 26     | -       | 34    | 10      | 25      | -        | 1128.0886                  | 75.1                  | -2                         | I                      |
| 37   | 13     | 25     | +       | 36    | 13      | 24      | +        | 1128.0886                  | 75.1                  | 7                          | I                      |
| 37   | 13     | 25     | -       | 36    | 13      | 24      | -        | 1128.0921                  | 89.2                  | -2                         | I                      |
| 33   | 6      | 28     | +       | 32    | 6       | 27      | +        | 1128.1045                  | 68.9                  | -1                         | I                      |
| 33   | 6      | 28     | -       | 32    | 6       | 27      | -        | 1128.1104                  | 69.5                  | 1                          | I                      |
| 34   | 8      | 26     | +       | 33    | 8       | 25      | +        | 1128.1332                  | 75.0                  | 0                          | I                      |
| 34   | 8      | 26     | -       | 33    | 8       | 25      | -        | 1128.1385                  | 75.9                  | 1                          | I                      |
| 33   | 4      | 30     | +       | 32    | 4       | 29      | +        | 1128.1769                  | 63.4                  | -2                         | I                      |
| 33   | 4      | 30     | -       | 32    | 4       | 29      | -        | 1128.1803                  | 64.1                  | 2                          | I                      |
| 32   | 3      | 29     | +       | 31    | 3       | 28      | +        | 1128.1863                  | 59.7                  | 0                          | I                      |
| 32   | 3      | 29     | -       | 31    | 3       | 28      | -        | 1128.1889                  | 60.4                  | 0                          | I                      |
| 38   | 14     | 24     | +       | 37    | 14      | 23      | +        | 1128.2018                  | 91.5                  | 2                          | I                      |
| 38   | 14     | 24     | -       | 37    | 14      | 23      | -        | 1128.2059                  | 92.0                  | -1                         | I                      |
| 33   | 5      | 29     | +       | 32    | 5       | 28      | +        | 1128.2502                  | 66.6                  | -1                         | I                      |
| 33   | 5      | 29     | -       | 32    | 5       | 28      | -        | 1128.2556                  | 66.7                  | 1                          | I                      |
| 36   | 11     | 25     | +       | 35    | 11      | 24      | +        | 1128.2764                  | 84.9                  | 0                          | I                      |
| 36   | 11     | 25     | -       | 35    | 11      | 24      | -        | 1128.2809                  | 84.5                  | 0                          | I                      |
| 39   | 15     | 25     | +       | 38    | 15      | 24      | +        | 1128.2879                  | 42.0                  | 1                          | II                     |
| 39   | 15     | 25     | -       | 38    | 15      | 24      | -        | 1128.2922                  | 39.6                  | 0                          | II                     |
| 44   | 2      | 42     | -       | 44    | 2       | 43      | -        | 1128.2983                  | 96.4                  | 2                          | II                     |
| 35   | 2      | 34     | +       | 34    | 2       | 33      | +        | 1128.3419                  | 45.5                  | 1                          | I                      |
| 35   | 2      | 34     | -       | 34    | 2       | 33      | -        | 1128.3419                  | 45.5                  | 0                          | I                      |
| 40   | 16     | 24     | +       | 39    | 16      | 23      | +        | 1128.3467                  | 47.5                  | 3                          | II                     |
| 40   | 16     | 24     | -       | 39    | 16      | 23      | -        | 1128.3510                  | 50.7                  | 1                          | II                     |
| 35   | 9      | 27     | +       | 34    | 9       | 26      | +        | 1128.3702                  | 78.5                  | 0                          | I                      |
| 35   | 9      | 27     | -       | 34    | 9       | 26      | -        | 1128.3752                  | 77.3                  | 0                          | I                      |
| 36   | 0      | 36     | +       | 35    | 0       | 35      | +        | 1128.3839                  | 40.3                  | -1                         | I                      |
| 36   | 0      | 36     | -       | 35    | 0       | 35      | -        | 1128.3839                  | 40.3                  | 1                          | I                      |
| 34   | 2      | 32     | +       | 33    | 2       | 31      | +        | 1128.3895                  | 45.7                  | 1                          | I                      |
| 34   | 2      | 32     | -       | 33    | 2       | 31      | -        | 1128.3895                  | 45.7                  | -2                         | I                      |
| 34   | 7      | 27     | +       | 33    | 7       | 26      | +        | 1128.3938                  | 70.1                  | -1                         | I                      |
| 34   | 7      | 27     | -       | 33    | 7       | 26      | -        | 1128.3998                  | 73.2                  | 1                          | I                      |
| 32   | 4      | 28     | +       | 31    | 4       | 27      | +        | 1128.4170                  | 62.8                  | 0                          | I                      |
| 32   | 4      | 28     | -       | 31    | 4       | 27      | -        | 1128.4248                  | 63.7                  | -1                         | I                      |
| 37   | 12     | 26     | +       | 36    | 12      | 25      | +        | 1128.4417                  | 87.9                  | 0                          | I                      |
| 37   | 12     | 26     | -       | 36    | 12      | 25      | -        | 1128.4463                  | 88.4                  | 0                          | I                      |
| 40   | 1      | 39     | +       | 40    | 1       | 40      | +        | 1128.5133                  | 99.1                  | 3                          | I                      |
| 38   | 13     | 25     | +       | 37    | 13      | 24      | +        | 1128.5799                  | 89.5                  | 0                          | I                      |
| 36   | 10     | 26     | +       | 35    | 10      | 25      | +        | 1128.5840                  | 75.7                  | 1                          | I                      |
| 38   | 13     | 25     | -       | 37    | 13      | 24      | -        | 1128.5840                  | 75.7                  | -4                         | I                      |
| 36   | 10     | 26     | -       | 35    | 10      | 25      | -        | 1128.5888                  | 82.7                  | 0                          | I                      |
| 35   | 8      | 28     | +       | 34    | 8       | 27      | +        | 1128.6394                  | 76.1                  | 0                          | I                      |
| 35   | 8      | 28     | -       | 34    | 8       | 27      | -        | 1128.6450                  | 76.3                  | 1                          | I                      |
| 39   | 14     | 26     | +       | 38    | 14      | 25      | +        | 1128.6905                  | 91.4                  | 0                          | I                      |
| 39   | 14     | 26     | -       | 38    | 14      | 25      | -        | 1128.6950                  | 65.2                  | -1                         | I                      |
| 34   | 6      | 28     | +       | 33    | 6       | 27      | +        | 1128.6950                  | 65.2                  | 0                          | I                      |
| 34   | 6      | 28     | -       | 33    | 6       | 27      | -        | 1128.7024                  | 70.9                  | 0                          | I                      |
| 35   | 3      | 33     | +       | 34    | 3       | 32      | +        | 1128.7593                  | 56.8                  | 4                          | I                      |
| 35   | 3      | 33     | -       | 34    | 3       | 32      | -        | 1128.7593                  | 56.8                  | -5                         | I                      |
| 37   | 11     | 27     | +       | 36    | 11      | 26      | +        | 1128.7722                  | 84.3                  | 2                          | I                      |
| 37   | 11     | 27     | -       | 36    | 11      | 26      | -        | 1128.7771                  | 83.8                  | 2                          | I                      |
| 36   | 1      | 35     | +       | 35    | 1       | 34      | +        | 1128.7881                  | 47.1                  | 0                          | I                      |
| 36   | 1      | 35     | -       | 35    | 1       | 34      | -        | 1128.7881                  | 47.1                  | 0                          | I                      |
| 37   | 1      | 37     | -       | 36    | 1       | 36      | -        | 1128.8289                  | 43.2                  | 1                          | I                      |
| 37   | 1      | 37     | +       | 36    | 1       | 36      | +        | 1128.8289                  | 43.2                  | -1                         | I                      |
| 41   | 16     | 26     | -       | 40    | 16      | 25      | -        | 1128.8345                  | 43.2                  | 1                          | II                     |
| 36   | 9      | 27     | +       | 35    | 9       | 26      | +        | 1128.8716                  | 80.0                  | 0                          | I                      |
| 36   | 9      | 27     | -       | 35    | 9       | 26      | -        | 1128.8769                  | 80.4                  | 1                          | I                      |
| 35   | 7      | 29     | +       | 34    | 7       | 28      | +        | 1128.8963                  | 73.8                  | 0                          | I                      |
| 35   | 7      | 29     | -       | 34    | 7       | 28      | -        | 1128.9022                  | 74.5                  | 1                          | I                      |
| 38   | 12     | 26     | +       | 37    | 12      | 25      | +        | 1128.9337                  | 89.0                  | -1                         | I                      |
| 38   | 12     | 26     | -       | 37    | 12      | 25      | -        | 1128.9385                  | 89.0                  | -1                         | I                      |
| 34   | 3      | 31     | +       | 33    | 3       | 30      | +        | 1129.0530                  | 58.3                  | 3                          | I                      |
| 39   | 13     | 27     | +       | 38    | 13      | 26      | +        | 1129.0684                  | 91.4                  | -1                         | I                      |
| 39   | 13     | 27     | -       | 38    | 13      | 26      | -        | 1129.0734                  | 91.3                  | 0                          | I                      |

| $N'$ | $K'_a$ | $K'_c$ | $J'^a)$ | $N''$ | $K''_a$ | $K''_c$ | $J''^b)$ | $\nu$ , exp. <sup>c)</sup> | Transm. <sup>d)</sup> | $\delta_\nu$ <sup>e)</sup> | Spectrum <sup>f)</sup> |
|------|--------|--------|---------|-------|---------|---------|----------|----------------------------|-----------------------|----------------------------|------------------------|
|      |        | 1      |         |       |         | 2       |          | 3                          | 4                     | 5                          | 6                      |
| 37   | 10     | 28     | +       | 36    | 10      | 27      | +        | 1129.0806                  | 83.4                  | 0                          | I                      |
| 37   | 10     | 28     | -       | 36    | 10      | 27      | -        | 1129.0858                  | 83.1                  | 0                          | I                      |
| 46   | 2      | 44     | +       | 46    | 2       | 45      | +        | 1129.1003                  | 96.8                  | -6                         | I                      |
| 35   | 4      | 32     | +       | 34    | 4       | 31      | +        | 1129.1075                  | 67.5                  | -2                         | I                      |
| 35   | 4      | 32     | -       | 34    | 4       | 31      | -        | 1129.1106                  | 67.2                  | 2                          | I                      |
| 35   | 6      | 30     | +       | 34    | 6       | 29      | +        | 1129.1291                  | 76.8                  | 9                          | I                      |
| 35   | 6      | 30     | -       | 34    | 6       | 29      | -        | 1129.1321                  | 71.3                  | 0                          | I                      |
| 36   | 8      | 28     | +       | 35    | 8       | 27      | +        | 1129.1446                  | 77.7                  | 0                          | I                      |
| 36   | 8      | 28     | -       | 35    | 8       | 27      | -        | 1129.1504                  | 78.1                  | 1                          | I                      |
| 34   | 5      | 29     | +       | 33    | 5       | 28      | +        | 1129.1577                  | 68.6                  | 0                          | I                      |
| 34   | 5      | 29     | -       | 33    | 5       | 28      | -        | 1129.1674                  | 69.2                  | -1                         | I                      |
| 40   | 14     | 26     | +       | 39    | 14      | 25      | +        | 1129.1760                  | 35.0                  | 0                          | II                     |
| 40   | 14     | 26     | -       | 39    | 14      | 25      | -        | 1129.1808                  | 36.5                  | 0                          | II                     |
| 37   | 2      | 36     | -       | 36    | 2       | 35      | -        | 1129.2252                  | 50.0                  | 0                          | I                      |
| 37   | 2      | 36     | +       | 36    | 2       | 35      | +        | 1129.2252                  | 50.0                  | 1                          | I                      |
| 35   | 5      | 31     | +       | 34    | 5       | 30      | +        | 1129.2387                  | 70.0                  | -1                         | I                      |
| 35   | 5      | 31     | -       | 34    | 5       | 30      | -        | 1129.2439                  | 69.8                  | 2                          | I                      |
| 36   | 2      | 34     | +       | 35    | 2       | 33      | +        | 1129.2487                  | 52.4                  | 2                          | I                      |
| 36   | 2      | 34     | -       | 35    | 2       | 33      | -        | 1129.2487                  | 52.4                  | -2                         | I                      |
| 41   | 15     | 27     | +       | 40    | 15      | 26      | +        | 1129.2564                  | 44.3                  | 1                          | II                     |
| 41   | 15     | 27     | -       | 40    | 15      | 26      | -        | 1129.2612                  | 43.9                  | -1                         | II                     |
| 38   | 11     | 27     | +       | 37    | 11      | 26      | +        | 1129.2647                  | 85.9                  | 0                          | I                      |
| 38   | 0      | 38     | -       | 37    | 0       | 37      | -        | 1129.2709                  | 44.3                  | 0                          | I                      |
| 38   | 11     | 27     | -       | 37    | 11      | 26      | -        | 1129.2709                  | 44.3                  | 11                         | I                      |
| 38   | 0      | 38     | +       | 37    | 0       | 37      | +        | 1129.2709                  | 44.3                  | -2                         | I                      |
| 42   | 16     | 26     | +       | 41    | 16      | 25      | +        | 1129.3100                  | 57.5                  | 4                          | II                     |
| 42   | 16     | 26     | -       | 41    | 16      | 25      | -        | 1129.3149                  | 59.3                  | 3                          | II                     |
| 58   | 4      | 54     | +       | 58    | 4       | 55      | +        | 1129.3583                  | 97.1                  | 4                          | II                     |
| 37   | 9      | 29     | +       | 36    | 9       | 28      | +        | 1129.3701                  | 80.8                  | 0                          | I                      |
| 37   | 9      | 29     | -       | 36    | 9       | 28      | -        | 1129.3756                  | 81.8                  | 1                          | I                      |
| 36   | 7      | 29     | +       | 35    | 7       | 28      | +        | 1129.4187                  | 75.5                  | 0                          | I                      |
| 36   | 7      | 29     | -       | 35    | 7       | 28      | -        | 1129.4252                  | 75.1                  | 1                          | I                      |
| 34   | 4      | 30     | +       | 33    | 4       | 29      | +        | 1129.4464                  | 66.9                  | 0                          | I                      |
| 34   | 4      | 30     | -       | 33    | 4       | 29      | -        | 1129.4533                  | 67.3                  | -1                         | I                      |
| 40   | 13     | 27     | +       | 39    | 13      | 26      | +        | 1129.5540                  | 91.9                  | 0                          | I                      |
| 40   | 13     | 27     | -       | 39    | 13      | 26      | -        | 1129.5590                  | 91.9                  | 0                          | I                      |
| 38   | 10     | 28     | +       | 37    | 10      | 27      | +        | 1129.5743                  | 84.8                  | -1                         | I                      |
| 38   | 10     | 28     | -       | 37    | 10      | 27      | -        | 1129.5797                  | 85.0                  | 0                          | I                      |
| 37   | 3      | 35     | +       | 36    | 3       | 34      | +        | 1129.6389                  | 59.0                  | 4                          | I                      |
| 37   | 3      | 35     | -       | 36    | 3       | 34      | -        | 1129.6389                  | 59.0                  | -3                         | I                      |
| 37   | 8      | 30     | +       | 36    | 8       | 29      | +        | 1129.6448                  | 78.2                  | -1                         | I                      |
| 37   | 8      | 30     | -       | 36    | 8       | 29      | -        | 1129.6507                  | 78.9                  | 0                          | I                      |
| 41   | 14     | 28     | +       | 40    | 14      | 27      | +        | 1129.6585                  | 38.6                  | 1                          | II                     |
| 38   | 1      | 37     | -       | 37    | 1       | 36      | -        | 1129.6638                  | 49.8                  | 0                          | I                      |
| 41   | 14     | 28     | -       | 40    | 14      | 27      | -        | 1129.6638                  | 49.8                  | 9                          | I                      |
| 38   | 1      | 37     | +       | 37    | 1       | 36      | +        | 1129.6638                  | 49.8                  | 0                          | I                      |
| 39   | 1      | 39     | +       | 38    | 1       | 38      | +        | 1129.7099                  | 49.0                  | -1                         | I                      |
| 39   | 1      | 39     | -       | 38    | 1       | 38      | -        | 1129.7099                  | 49.0                  | 0                          | I                      |
| 42   | 15     | 27     | +       | 41    | 15      | 26      | +        | 1129.7360                  | 50.9                  | 2                          | II                     |
| 42   | 15     | 27     | -       | 41    | 15      | 26      | -        | 1129.7410                  | 51.5                  | 0                          | II                     |
| 39   | 11     | 29     | +       | 38    | 11      | 28      | +        | 1129.7542                  | 87.4                  | 0                          | I                      |
| 39   | 11     | 29     | -       | 38    | 11      | 28      | -        | 1129.7595                  | 87.3                  | 0                          | I                      |
| 36   | 6      | 30     | +       | 35    | 6       | 29      | +        | 1129.7637                  | 73.6                  | 0                          | I                      |
| 36   | 6      | 30     | -       | 35    | 6       | 29      | -        | 1129.7721                  | 74.5                  | 0                          | I                      |
| 43   | 16     | 28     | +       | 42    | 16      | 27      | +        | 1129.7870                  | 59.7                  | 7                          | II                     |
| 66   | 5      | 61     | +       | 66    | 5       | 62      | +        | 1129.7890                  | 70.1                  | -8                         | II                     |
| 43   | 16     | 28     | -       | 42    | 16      | 27      | -        | 1129.7919                  | 50.8                  | 3                          | II                     |
| 66   | 5      | 61     | -       | 66    | 5       | 62      | -        | 1129.8380                  | 98.8                  | 3                          | II                     |
| 38   | 9      | 29     | +       | 37    | 9       | 28      | +        | 1129.8658                  | 82.3                  | 0                          | I                      |
| 38   | 9      | 29     | -       | 37    | 9       | 28      | -        | 1129.8715                  | 82.7                  | 1                          | I                      |
| 36   | 3      | 33     | +       | 35    | 3       | 32      | +        | 1129.8829                  | 56.9                  | 4                          | I                      |
| 36   | 3      | 33     | -       | 35    | 3       | 32      | -        | 1129.8829                  | 56.9                  | -5                         | I                      |
| 40   | 12     | 28     | +       | 39    | 12      | 27      | +        | 1129.9078                  | 71.6                  | -6                         | I                      |
| 37   | 7      | 31     | +       | 36    | 7       | 30      | +        | 1129.9078                  | 71.6                  | 1                          | I                      |
| 37   | 7      | 31     | -       | 36    | 7       | 30      | -        | 1129.9139                  | 71.5                  | 0                          | I                      |
| 40   | 12     | 28     | -       | 39    | 12      | 27      | -        | 1129.9139                  | 71.5                  | 2                          | I                      |
| 48   | 2      | 46     | -       | 48    | 2       | 47      | -        | 1129.9799                  | 99.1                  | 11                         | I                      |
| 37   | 4      | 34     | +       | 36    | 4       | 33      | +        | 1130.0122                  | 70.7                  | -2                         | I                      |
| 37   | 4      | 34     | -       | 36    | 4       | 33      | -        | 1130.0150                  | 71.2                  | 3                          | I                      |
| 41   | 13     | 29     | +       | 40    | 13      | 28      | +        | 1130.0364                  | 92.1                  | 1                          | I                      |
| 41   | 13     | 29     | -       | 40    | 13      | 28      | -        | 1130.0415                  | 92.8                  | 0                          | I                      |
| 39   | 10     | 30     | +       | 38    | 10      | 29      | +        | 1130.0650                  | 85.5                  | 0                          | I                      |

| $N'$ | $K'_a$ | $K'_c$ | $J'^a)$ | $N''$ | $K''_a$ | $K''_c$ | $J''^b)$ | $\nu$ , exp. <sup>c)</sup> | Transm. <sup>d)</sup> | $\delta_\nu$ <sup>e)</sup> | Spectrum <sup>f)</sup> |
|------|--------|--------|---------|-------|---------|---------|----------|----------------------------|-----------------------|----------------------------|------------------------|
|      |        | 1      |         |       |         | 2       |          | 3                          | 4                     | 5                          | 6                      |
| 39   | 10     | 30     | —       | 38    | 10      | 29      | —        | 1130.0706                  | 86.2                  | 1                          | I                      |
| 39   | 2      | 38     | +       | 38    | 2       | 37      | +        | 1130.0962                  | 54.2                  | 1                          | I                      |
| 39   | 2      | 38     | —       | 38    | 2       | 37      | —        | 1130.0962                  | 54.2                  | 0                          | I                      |
| 38   | 2      | 36     | —       | 37    | 2       | 35      | —        | 1130.1018                  | 57.6                  | -2                         | I                      |
| 38   | 2      | 36     | +       | 37    | 2       | 35      | +        | 1130.1018                  | 57.6                  | 1                          | I                      |
| 37   | 6      | 32     | +       | 36    | 6       | 31      | +        | 1130.1303                  | 75.9                  | 0                          | I                      |
| 37   | 6      | 32     | —       | 36    | 6       | 31      | —        | 1130.1367                  | 73.5                  | 3                          | I                      |
| 40   | 0      | 40     | —       | 39    | 0       | 39      | —        | 1130.1459                  | 42.7                  | 0                          | I                      |
| 60   | 4      | 56     | +       | 60    | 4       | 57      | +        | 1130.1459                  | 42.7                  | -8                         | I                      |
| 40   | 0      | 40     | +       | 39    | 0       | 39      | +        | 1130.1459                  | 42.7                  | -1                         | I                      |
| 38   | 8      | 30     | +       | 37    | 8       | 29      | +        | 1130.1459                  | 42.7                  | 0                          | I                      |
| 38   | 8      | 30     | —       | 37    | 8       | 29      | —        | 1130.1520                  | 80.3                  | 0                          | I                      |
| 60   | 4      | 56     | —       | 60    | 4       | 57      | —        | 1130.1928                  | 84.4                  | -6                         | II                     |
| 37   | 5      | 33     | +       | 36    | 5       | 32      | +        | 1130.2003                  | 73.5                  | -2                         | I                      |
| 37   | 5      | 33     | —       | 36    | 5       | 32      | —        | 1130.2053                  | 74.7                  | 2                          | I                      |
| 43   | 15     | 29     | +       | 42    | 15      | 28      | +        | 1130.2124                  | 47.8                  | 4                          | II                     |
| 43   | 15     | 29     | —       | 42    | 15      | 28      | —        | 1130.2173                  | 52.6                  | 0                          | II                     |
| 40   | 11     | 29     | +       | 39    | 11      | 28      | +        | 1130.2406                  | 88.9                  | 0                          | I                      |
| 40   | 11     | 29     | —       | 39    | 11      | 28      | —        | 1130.2461                  | 89.1                  | 0                          | I                      |
| 44   | 16     | 28     | +       | 43    | 16      | 27      | +        | 1130.2602                  | 50.9                  | 4                          | II                     |
| 44   | 16     | 28     | —       | 43    | 16      | 27      | —        | 1130.2658                  | 54.9                  | 5                          | II                     |
| 36   | 5      | 31     | +       | 35    | 5       | 30      | +        | 1130.2701                  | 71.8                  | 0                          | I                      |
| 36   | 5      | 31     | —       | 35    | 5       | 30      | —        | 1130.2800                  | 71.8                  | -1                         | I                      |
| 39   | 9      | 31     | +       | 38    | 9       | 30      | +        | 1130.3584                  | 83.6                  | 0                          | I                      |
| 39   | 9      | 31     | —       | 38    | 9       | 30      | —        | 1130.3643                  | 83.4                  | 0                          | I                      |
| 41   | 12     | 30     | +       | 40    | 12      | 29      | +        | 1130.3909                  | 91.2                  | -1                         | I                      |
| 41   | 12     | 30     | —       | 40    | 12      | 29      | —        | 1130.3963                  | 91.5                  | -1                         | I                      |
| 36   | 4      | 32     | +       | 35    | 4       | 31      | +        | 1130.4183                  | 69.0                  | 1                          | I                      |
| 36   | 4      | 32     | —       | 35    | 4       | 31      | —        | 1130.4209                  | 75.1                  | -10                        | I                      |
| 38   | 7      | 31     | +       | 37    | 7       | 30      | +        | 1130.4381                  | 77.6                  | 0                          | I                      |
| 38   | 7      | 31     | —       | 37    | 7       | 30      | —        | 1130.4452                  | 79.8                  | 1                          | I                      |
| 39   | 3      | 37     | —       | 38    | 3       | 36      | —        | 1130.5032                  | 63.5                  | -3                         | I                      |
| 39   | 3      | 37     | +       | 38    | 3       | 36      | +        | 1130.5032                  | 63.5                  | 3                          | I                      |
| 42   | 13     | 29     | +       | 41    | 13      | 28      | +        | 1130.5153                  | 92.7                  | 0                          | I                      |
| 42   | 13     | 29     | —       | 41    | 13      | 28      | —        | 1130.5207                  | 92.8                  | -1                         | I                      |
| 40   | 1      | 39     | —       | 39    | 1       | 38      | —        | 1130.5281                  | 57.1                  | 0                          | I                      |
| 40   | 1      | 39     | +       | 39    | 1       | 38      | +        | 1130.5281                  | 57.1                  | 1                          | I                      |
| 40   | 10     | 30     | +       | 39    | 10      | 29      | +        | 1130.5527                  | 86.7                  | -1                         | I                      |
| 40   | 10     | 30     | —       | 39    | 10      | 29      | —        | 1130.5585                  | 86.0                  | 0                          | I                      |
| 41   | 1      | 41     | +       | 40    | 1       | 40      | +        | 1130.5789                  | 54.8                  | -1                         | I                      |
| 41   | 1      | 41     | —       | 40    | 1       | 40      | —        | 1130.5789                  | 54.8                  | 0                          | I                      |
| 43   | 14     | 30     | +       | 42    | 14      | 29      | +        | 1130.6134                  | 47.3                  | 1                          | II                     |
| 43   | 14     | 30     | —       | 42    | 14      | 29      | —        | 1130.6188                  | 48.0                  | -1                         | II                     |
| 39   | 8      | 32     | +       | 38    | 8       | 31      | +        | 1130.6391                  | 82.4                  | -1                         | I                      |
| 39   | 8      | 32     | —       | 38    | 8       | 31      | —        | 1130.6454                  | 82.4                  | 1                          | I                      |
| 44   | 15     | 29     | +       | 43    | 15      | 28      | +        | 1130.6852                  | 55.8                  | 4                          | II                     |
| 38   | 3      | 35     | —       | 37    | 3       | 34      | —        | 1130.6910                  | 58.6                  | -4                         | I                      |
| 38   | 3      | 35     | +       | 37    | 3       | 34      | +        | 1130.6910                  | 58.6                  | 2                          | I                      |
| 41   | 11     | 31     | +       | 40    | 11      | 30      | +        | 1130.7238                  | 18.6                  | -2                         | I                      |
| 45   | 16     | 30     | +       | 44    | 16      | 29      | +        | 1130.7296                  | 12.9                  | -3                         | I                      |
| 41   | 11     | 31     | —       | 40    | 11      | 30      | —        | 1130.7296                  | 12.9                  | 1                          | I                      |
| 45   | 16     | 30     | —       | 44    | 16      | 29      | —        | 1130.7362                  | 67.9                  | 6                          | I                      |
| 38   | 6      | 32     | +       | 37    | 6       | 31      | +        | 1130.8398                  | 77.5                  | 0                          | I                      |
| 38   | 6      | 32     | —       | 37    | 6       | 31      | —        | 1130.8489                  | 67.3                  | -2                         | I                      |
| 40   | 9      | 31     | +       | 39    | 9       | 30      | +        | 1130.8489                  | 67.3                  | 3                          | I                      |
| 40   | 9      | 31     | —       | 39    | 9       | 30      | —        | 1130.8547                  | 85.0                  | 1                          | I                      |
| 42   | 12     | 30     | +       | 41    | 12      | 29      | +        | 1130.8704                  | 91.5                  | 0                          | I                      |
| 42   | 12     | 30     | —       | 41    | 12      | 29      | —        | 1130.8759                  | 92.3                  | -1                         | I                      |
| 39   | 4      | 36     | +       | 38    | 4       | 35      | +        | 1130.8929                  | 73.6                  | -1                         | I                      |
| 39   | 4      | 36     | —       | 38    | 4       | 35      | —        | 1130.8954                  | 74.2                  | 3                          | I                      |
| 39   | 7      | 33     | +       | 38    | 7       | 32      | +        | 1130.9067                  | 79.7                  | -1                         | I                      |
| 39   | 7      | 33     | —       | 38    | 7       | 32      | —        | 1130.9134                  | 81.0                  | 1                          | I                      |
| 40   | 2      | 38     | +       | 39    | 2       | 37      | +        | 1130.9474                  | 63.5                  | 2                          | I                      |
| 40   | 2      | 38     | —       | 39    | 2       | 37      | —        | 1130.9474                  | 63.5                  | -1                         | I                      |
| 62   | 4      | 58     | —       | 62    | 4       | 59      | —        | 1130.9550                  | 59.4                  | -3                         | I                      |
| 41   | 2      | 40     | —       | 40    | 2       | 39      | —        | 1130.9550                  | 59.4                  | 0                          | I                      |
| 41   | 2      | 40     | +       | 40    | 2       | 39      | +        | 1130.9550                  | 59.4                  | 0                          | I                      |
| 43   | 13     | 31     | +       | 42    | 13      | 30      | +        | 1130.9912                  | 40.2                  | 0                          | II                     |
| 43   | 13     | 31     | —       | 42    | 13      | 30      | —        | 1130.9967                  | 40.7                  | -1                         | II                     |
| 42   | 0      | 42     | +       | 41    | 0       | 41      | +        | 1131.0088                  | 57.4                  | -1                         | I                      |
| 42   | 0      | 42     | —       | 41    | 0       | 41      | —        | 1131.0088                  | 57.4                  | 0                          | I                      |
| 56   | 3      | 53     | —       | 56    | 3       | 54      | —        | 1131.0219                  | 92.3                  | 16                         | II                     |

| $N'$ | $K'_a$ | $K'_c$ | $J'^a)$ | $N''$ | $K''_a$ | $K''_c$ | $J''^b)$ | $\nu$ , exp. <sup>c)</sup> | Transm. <sup>d)</sup> | $\delta_\nu$ <sup>e)</sup> | Spectrum <sup>f)</sup> |
|------|--------|--------|---------|-------|---------|---------|----------|----------------------------|-----------------------|----------------------------|------------------------|
|      |        | 1      |         |       |         | 2       |          | 3                          | 4                     | 5                          | 6                      |
| 41   | 10     | 32     | +       | 40    | 10      | 31      | +        | 1131.0373                  | 15.8                  | -1                         | II                     |
| 41   | 10     | 32     | -       | 40    | 10      | 31      | -        | 1131.0432                  | 17.0                  | 0                          | II                     |
| 44   | 14     | 30     | +       | 43    | 14      | 29      | +        | 1131.0860                  | 43.9                  | 0                          | II                     |
| 44   | 14     | 30     | -       | 43    | 14      | 29      | -        | 1131.0916                  | 51.4                  | -1                         | II                     |
| 39   | 6      | 34     | +       | 38    | 6       | 33      | +        | 1131.1146                  | 78.9                  | -1                         | I                      |
| 39   | 6      | 34     | -       | 38    | 6       | 33      | -        | 1131.1209                  | 79.2                  | 2                          | I                      |
| 39   | 5      | 35     | +       | 38    | 5       | 34      | +        | 1131.1338                  | 76.7                  | -1                         | I                      |
| 40   | 8      | 32     | +       | 39    | 8       | 31      | +        | 1131.1379                  | 68.9                  | 6                          | I                      |
| 39   | 5      | 35     | -       | 38    | 5       | 34      | -        | 1131.1379                  | 68.9                  | -2                         | I                      |
| 40   | 8      | 32     | -       | 39    | 8       | 31      | -        | 1131.1438                  | 83.8                  | 0                          | I                      |
| 45   | 15     | 31     | +       | 44    | 15      | 30      | +        | 1131.1548                  | 60.3                  | 3                          | II                     |
| 45   | 15     | 31     | -       | 44    | 15      | 30      | -        | 1131.1603                  | 60.7                  | 1                          | II                     |
| 42   | 11     | 31     | +       | 41    | 11      | 30      | +        | 1131.2040                  | 88.9                  | -1                         | I                      |
| 42   | 11     | 31     | -       | 41    | 11      | 30      | -        | 1131.2099                  | 90.7                  | 0                          | I                      |
| 63   | 5      | 59     | +       | 63    | 3       | 60      | +        | 1131.3051                  | 97.2                  | 0                          | II                     |
| 38   | 4      | 34     | +       | 37    | 4       | 33      | +        | 1131.3298                  | 74.2                  | 0                          | I                      |
| 41   | 9      | 33     | +       | 40    | 9       | 32      | +        | 1131.3346                  | 67.6                  | -6                         | I                      |
| 38   | 4      | 34     | -       | 37    | 4       | 33      | -        | 1131.3346                  | 67.6                  | 3                          | I                      |
| 41   | 9      | 33     | -       | 40    | 9       | 32      | -        | 1131.3415                  | 85.7                  | 1                          | I                      |
| 43   | 12     | 32     | +       | 42    | 12      | 31      | +        | 1131.3466                  | 91.5                  | 0                          | I                      |
| 43   | 12     | 32     | -       | 42    | 12      | 31      | -        | 1131.3525                  | 60.9                  | 1                          | I                      |
| 41   | 3      | 39     | -       | 40    | 3       | 38      | -        | 1131.3525                  | 60.9                  | -13                        | I                      |
| 41   | 3      | 39     | +       | 40    | 3       | 38      | +        | 1131.3525                  | 60.9                  | -8                         | I                      |
| 38   | 5      | 33     | -       | 37    | 5       | 32      | -        | 1131.3609                  | 75.6                  | -2                         | I                      |
| 42   | 1      | 41     | -       | 41    | 1       | 40      | -        | 1131.3803                  | 62.4                  | 0                          | I                      |
| 42   | 1      | 41     | +       | 41    | 1       | 40      | +        | 1131.3803                  | 62.4                  | 0                          | I                      |
| 43   | 1      | 43     | -       | 42    | 1       | 42      | -        | 1131.4357                  | 60.4                  | 0                          | I                      |
| 43   | 1      | 43     | +       | 42    | 1       | 42      | +        | 1131.4357                  | 60.4                  | -1                         | I                      |
| 40   | 7      | 33     | +       | 39    | 7       | 32      | +        | 1131.4547                  | 81.8                  | -1                         | I                      |
| 40   | 7      | 33     | -       | 39    | 7       | 32      | -        | 1131.4626                  | 80.7                  | 2                          | I                      |
| 44   | 13     | 31     | -       | 43    | 13      | 30      | -        | 1131.4695                  | 43.8                  | -1                         | II                     |
| 40   | 3      | 37     | +       | 39    | 3       | 36      | +        | 1131.4894                  | 65.8                  | 2                          | I                      |
| 40   | 3      | 37     | -       | 39    | 3       | 36      | -        | 1131.4894                  | 65.8                  | -2                         | I                      |
| 42   | 10     | 32     | +       | 41    | 10      | 31      | +        | 1131.5191                  | 88.7                  | -1                         | I                      |
| 42   | 10     | 32     | -       | 41    | 10      | 31      | -        | 1131.5252                  | 89.3                  | 0                          | I                      |
| 45   | 14     | 32     | +       | 44    | 14      | 31      | +        | 1131.5554                  | 54.6                  | 1                          | II                     |
| 45   | 14     | 32     | -       | 44    | 14      | 31      | -        | 1131.5611                  | 54.0                  | -1                         | II                     |
| 41   | 8      | 34     | +       | 40    | 8       | 33      | +        | 1131.6222                  | 83.6                  | -2                         | II                     |
| 46   | 15     | 31     | +       | 45    | 15      | 30      | +        | 1131.6222                  | 6.8                   | 14                         | II                     |
| 41   | 8      | 34     | -       | 40    | 8       | 33      | -        | 1131.6289                  | 84.9                  | 0                          | I                      |
| 47   | 16     | 32     | -       | 46    | 16      | 31      | -        | 1131.6672                  | 72.0                  | 8                          | II                     |
| 43   | 11     | 33     | +       | 42    | 11      | 32      | +        | 1131.6813                  | 91.4                  | 1                          | I                      |
| 43   | 11     | 33     | -       | 42    | 11      | 32      | -        | 1131.6872                  | 90.7                  | 0                          | I                      |
| 41   | 4      | 38     | +       | 40    | 4       | 37      | +        | 1131.7518                  | 77.6                  | -1                         | I                      |
| 41   | 4      | 38     | -       | 40    | 4       | 37      | -        | 1131.7539                  | 77.7                  | 3                          | I                      |
| 42   | 2      | 40     | -       | 41    | 2       | 39      | -        | 1131.7838                  | 68.4                  | -1                         | I                      |
| 42   | 2      | 40     | +       | 41    | 2       | 39      | +        | 1131.7838                  | 68.4                  | 2                          | I                      |
| 43   | 2      | 42     | -       | 42    | 2       | 41      | -        | 1131.8016                  | 65.2                  | 1                          | I                      |
| 43   | 2      | 42     | +       | 42    | 2       | 41      | +        | 1131.8016                  | 65.2                  | 1                          | I                      |
| 44   | 12     | 32     | +       | 43    | 12      | 31      | +        | 1131.8199                  | 82.5                  | 3                          | I                      |
| 42   | 9      | 33     | +       | 41    | 9       | 32      | +        | 1131.8199                  | 82.5                  | -2                         | I                      |
| 44   | 12     | 32     | -       | 43    | 12      | 31      | -        | 1131.8263                  | 84.2                  | 7                          | I                      |
| 42   | 9      | 33     | -       | 41    | 9       | 32      | -        | 1131.8263                  | 84.2                  | -2                         | I                      |
| 44   | 0      | 44     | -       | 43    | 0       | 43      | -        | 1131.8596                  | 62.8                  | 0                          | I                      |
| 44   | 0      | 44     | +       | 43    | 0       | 43      | +        | 1131.8596                  | 62.8                  | 0                          | I                      |
| 41   | 7      | 35     | -       | 40    | 7       | 34      | -        | 1131.8989                  | 84.2                  | 0                          | I                      |
| 40   | 6      | 34     | +       | 39    | 6       | 33      | +        | 1131.9225                  | 80.6                  | 0                          | I                      |
| 40   | 6      | 34     | -       | 39    | 6       | 33      | -        | 1131.9328                  | 77.4                  | 0                          | I                      |
| 45   | 13     | 33     | +       | 44    | 13      | 32      | +        | 1131.9328                  | 77.4                  | -5                         | I                      |
| 45   | 13     | 33     | -       | 44    | 13      | 32      | -        | 1131.9390                  | 95.1                  | -1                         | I                      |
| 43   | 10     | 34     | +       | 42    | 10      | 33      | +        | 1131.9976                  | 89.8                  | -2                         | I                      |
| 43   | 10     | 34     | -       | 42    | 10      | 33      | -        | 1132.0040                  | 90.4                  | 0                          | I                      |
| 46   | 14     | 32     | +       | 45    | 14      | 31      | +        | 1132.0215                  | 56.7                  | 1                          | II                     |
| 46   | 14     | 32     | -       | 45    | 14      | 31      | -        | 1132.0274                  | 57.4                  | 0                          | II                     |
| 41   | 5      | 37     | +       | 40    | 5       | 36      | +        | 1132.0386                  | 80.5                  | -2                         | I                      |
| 41   | 5      | 37     | -       | 40    | 5       | 36      | -        | 1132.0429                  | 80.8                  | 4                          | I                      |
| 41   | 6      | 36     | +       | 40    | 6       | 35      | +        | 1132.0762                  | 82.0                  | 0                          | I                      |
| 41   | 6      | 36     | -       | 40    | 6       | 35      | -        | 1132.0823                  | 82.2                  | 1                          | I                      |
| 47   | 15     | 33     | -       | 46    | 15      | 32      | -        | 1132.0902                  | 66.3                  | 2                          | II                     |
| 42   | 8      | 34     | +       | 41    | 8       | 33      | +        | 1132.1199                  | 85.9                  | -1                         | I                      |
| 48   | 16     | 32     | -       | 47    | 16      | 31      | -        | 1132.1269                  | 85.0                  | 0                          | I                      |
| 42   | 8      | 34     | -       | 41    | 8       | 33      | -        | 1132.1269                  | 85.0                  | 1                          | I                      |

| $N'$ | $K'_a$ | $K'_c$ | $J'^a)$ | $N''$ | $K''_a$ | $K''_c$ | $J''^b)$ | $\nu$ , exp. <sup>c)</sup> | Transm. <sup>d)</sup> | $\delta_\nu$ <sup>e)</sup> | Spectrum <sup>f)</sup> |
|------|--------|--------|---------|-------|---------|---------|----------|----------------------------|-----------------------|----------------------------|------------------------|
|      |        | 1      |         |       |         | 2       |          | 3                          | 4                     | 5                          | 6                      |
| 44   | 11     | 33     | +       | 43    | 11      | 32      | +        | 1132.1550                  | 91.9                  | -2                         | I                      |
| 44   | 11     | 33     | -       | 43    | 11      | 32      | -        | 1132.1613                  | 92.0                  | 0                          | I                      |
| 40   | 4      | 36     | +       | 39    | 4       | 35      | +        | 1132.1822                  | 77.1                  | 0                          | I                      |
| 40   | 4      | 36     | -       | 39    | 4       | 35      | -        | 1132.1854                  | 77.7                  | 0                          | I                      |
| 43   | 3      | 41     | -       | 42    | 3       | 40      | -        | 1132.1905                  | 71.8                  | -2                         | I                      |
| 43   | 3      | 41     | +       | 42    | 3       | 40      | +        | 1132.1905                  | 71.8                  | 2                          | I                      |
| 44   | 1      | 43     | +       | 43    | 1       | 42      | +        | 1132.2206                  | 67.3                  | 0                          | I                      |
| 44   | 1      | 43     | -       | 43    | 1       | 42      | -        | 1132.2206                  | 67.3                  | 0                          | I                      |
| 45   | 1      | 45     | +       | 44    | 1       | 44      | +        | 1132.2804                  | 63.9                  | 0                          | I                      |
| 45   | 1      | 45     | -       | 44    | 1       | 44      | -        | 1132.2804                  | 63.9                  | 0                          | I                      |
| 42   | 3      | 39     | +       | 41    | 3       | 38      | +        | 1132.2836                  | 70.1                  | 2                          | I                      |
| 42   | 3      | 39     | -       | 41    | 3       | 38      | -        | 1132.2836                  | 70.1                  | -3                         | I                      |
| 45   | 12     | 34     | +       | 44    | 12      | 33      | +        | 1132.2893                  | 92.9                  | -1                         | I                      |
| 45   | 12     | 34     | -       | 44    | 12      | 33      | -        | 1132.2956                  | 93.0                  | 0                          | I                      |
| 43   | 9      | 35     | +       | 42    | 9       | 34      | +        | 1132.3007                  | 88.8                  | 1                          | I                      |
| 43   | 9      | 35     | -       | 42    | 9       | 34      | -        | 1132.3071                  | 88.4                  | 0                          | I                      |
| 66   | 4      | 62     | +       | 66    | 4       | 63      | +        | 1132.3702                  | 95.6                  | 8                          | II                     |
| 40   | 5      | 35     | +       | 39    | 5       | 34      | +        | 1132.3865                  | 79.2                  | 0                          | I                      |
| 40   | 5      | 35     | -       | 39    | 5       | 34      | -        | 1132.3954                  | 80.0                  | -1                         | I                      |
| 46   | 13     | 33     | +       | 45    | 13      | 32      | +        | 1132.3993                  | 48.4                  | 0                          | II                     |
| 46   | 13     | 33     | -       | 45    | 13      | 32      | -        | 1132.4054                  | 51.9                  | -1                         | II                     |
| 44   | 10     | 34     | +       | 43    | 10      | 33      | +        | 1132.4721                  | 81.6                  | -14                        | I                      |
| 42   | 7      | 35     | +       | 41    | 7       | 34      | +        | 1132.4721                  | 81.6                  | 2                          | I                      |
| 44   | 10     | 34     | -       | 43    | 10      | 33      | -        | 1132.4802                  | 78.5                  | 3                          | I                      |
| 42   | 7      | 35     | -       | 41    | 7       | 34      | -        | 1132.4802                  | 78.5                  | -2                         | I                      |
| 47   | 14     | 34     | +       | 46    | 14      | 33      | +        | 1132.4842                  | 58.1                  | 1                          | II                     |
| 47   | 14     | 34     | -       | 46    | 14      | 33      | -        | 1132.4903                  | 60.9                  | 0                          | II                     |
| 60   | 3      | 57     | -       | 60    | 3       | 58      | -        | 1132.5380                  | 97.7                  | 3                          | II                     |
| 48   | 15     | 33     | +       | 47    | 15      | 32      | +        | 1132.5440                  | 68.6                  | 4                          | II                     |
| 48   | 15     | 33     | -       | 47    | 15      | 32      | -        | 1132.5502                  | 70.0                  | 3                          | II                     |
| 43   | 4      | 40     | +       | 42    | 4       | 39      | +        | 1132.5934                  | 73.9                  | 22                         | I                      |
| 43   | 4      | 40     | -       | 42    | 4       | 39      | -        | 1132.5934                  | 73.9                  | 9                          | I                      |
| 43   | 8      | 36     | +       | 42    | 8       | 35      | +        | 1132.5934                  | 73.9                  | -8                         | I                      |
| 43   | 8      | 36     | -       | 42    | 8       | 35      | -        | 1132.6010                  | 87.6                  | 0                          | I                      |
| 44   | 2      | 42     | -       | 43    | 2       | 41      | -        | 1132.6101                  | 73.7                  | 0                          | I                      |
| 44   | 2      | 42     | +       | 43    | 2       | 41      | +        | 1132.6101                  | 73.7                  | 2                          | I                      |
| 45   | 11     | 35     | +       | 44    | 11      | 34      | +        | 1132.6259                  | 34.1                  | -1                         | II                     |
| 45   | 11     | 35     | -       | 44    | 11      | 34      | -        | 1132.6323                  | 35.1                  | 0                          | II                     |
| 45   | 2      | 44     | +       | 44    | 2       | 43      | +        | 1132.6360                  | 70.0                  | 0                          | I                      |
| 45   | 2      | 44     | -       | 44    | 2       | 43      | -        | 1132.6360                  | 70.0                  | 1                          | I                      |
| 46   | 0      | 46     | +       | 45    | 0       | 45      | +        | 1132.6981                  | 68.1                  | 0                          | I                      |
| 46   | 0      | 46     | -       | 45    | 0       | 45      | -        | 1132.6981                  | 68.1                  | 0                          | I                      |
| 46   | 12     | 34     | +       | 45    | 12      | 33      | +        | 1132.7560                  | 44.8                  | -1                         | II                     |
| 46   | 12     | 34     | -       | 45    | 12      | 33      | -        | 1132.7623                  | 45.8                  | -1                         | II                     |
| 44   | 9      | 35     | +       | 43    | 9       | 34      | +        | 1132.7806                  | 89.8                  | 0                          | I                      |
| 44   | 9      | 35     | -       | 43    | 9       | 34      | -        | 1132.7874                  | 89.5                  | 1                          | I                      |
| 47   | 13     | 35     | +       | 46    | 13      | 34      | +        | 1132.8620                  | 6.5                   | -3                         | II                     |
| 43   | 7      | 37     | +       | 42    | 7       | 36      | +        | 1132.8620                  | 6.5                   | -1                         | II                     |
| 47   | 13     | 35     | -       | 46    | 13      | 34      | -        | 1132.8688                  | 7.2                   | 3                          | II                     |
| 43   | 7      | 37     | -       | 42    | 7       | 36      | -        | 1132.8688                  | 7.2                   | 1                          | II                     |
| 61   | 4      | 58     | -       | 61    | 2       | 59      | -        | 1132.9089                  | 93.5                  | -2                         | II                     |
| 43   | 5      | 39     | +       | 42    | 5       | 38      | +        | 1132.9150                  | 83.7                  | -3                         | I                      |
| 43   | 5      | 39     | -       | 42    | 5       | 38      | -        | 1132.9191                  | 83.9                  | 5                          | I                      |
| 45   | 10     | 36     | +       | 44    | 10      | 35      | +        | 1132.9459                  | 27.9                  | -2                         | II                     |
| 45   | 10     | 36     | -       | 44    | 10      | 35      | -        | 1132.9524                  | 28.7                  | -1                         | II                     |
| 42   | 4      | 38     | +       | 41    | 4       | 37      | +        | 1132.9825                  | 79.9                  | 1                          | I                      |
| 42   | 4      | 38     | -       | 41    | 4       | 37      | -        | 1132.9844                  | 80.5                  | 1                          | I                      |
| 49   | 15     | 35     | +       | 48    | 15      | 34      | +        | 1133.0005                  | 71.1                  | 5                          | II                     |
| 42   | 6      | 36     | +       | 41    | 6       | 35      | +        | 1133.0047                  | 83.1                  | 1                          | I                      |
| 45   | 3      | 43     | +       | 44    | 3       | 42      | +        | 1133.0152                  | 64.9                  | 7                          | I                      |
| 42   | 6      | 36     | -       | 41    | 6       | 35      | -        | 1133.0152                  | 64.9                  | -5                         | I                      |
| 43   | 6      | 38     | -       | 42    | 6       | 37      | -        | 1133.0152                  | 64.9                  | -27                        | I                      |
| 43   | 6      | 38     | +       | 42    | 6       | 37      | +        | 1133.0152                  | 64.9                  | 30                         | I                      |
| 45   | 3      | 43     | -       | 44    | 3       | 42      | -        | 1133.0152                  | 64.9                  | 4                          | I                      |
| 46   | 1      | 45     | -       | 45    | 1       | 44      | -        | 1133.0488                  | 72.1                  | 1                          | I                      |
| 46   | 1      | 45     | +       | 45    | 1       | 44      | +        | 1133.0488                  | 72.1                  | 0                          | I                      |
| 44   | 3      | 41     | +       | 43    | 3       | 40      | +        | 1133.0750                  | 77.0                  | 4                          | I                      |
| 44   | 3      | 41     | -       | 43    | 3       | 40      | -        | 1133.0750                  | 77.0                  | -1                         | I                      |
| 44   | 8      | 36     | +       | 43    | 8       | 35      | +        | 1133.0944                  | 85.5                  | -6                         | I                      |
| 44   | 8      | 36     | -       | 43    | 8       | 35      | -        | 1133.1024                  | 87.8                  | 1                          | I                      |
| 47   | 1      | 47     | +       | 46    | 1       | 46      | +        | 1133.1128                  | 70.5                  | 0                          | I                      |
| 56   | 2      | 54     | +       | 56    | 2       | 55      | +        | 1133.1128                  | 70.5                  | -7                         | I                      |

| $N'$ | $K'_a$ | $K'_c$ | $J'^a)$ | $N''$ | $K''_a$ | $K''_c$ | $J''^b)$ | $\nu$ , exp. <sup>c)</sup> | Transm. <sup>d)</sup> | $\delta_\nu$ <sup>e)</sup> | Spectrum <sup>f)</sup> |
|------|--------|--------|---------|-------|---------|---------|----------|----------------------------|-----------------------|----------------------------|------------------------|
|      |        | 1      |         |       |         | 2       |          | 3                          | 4                     | 5                          | 6                      |
| 47   | 1      | 47     | —       | 46    | 1       | 46      | —        | 1133.1128                  | 70.5                  | -1                         | I                      |
| 47   | 12     | 36     | +       | 46    | 12      | 35      | +        | 1133.2195                  | 49.0                  | -1                         | II                     |
| 47   | 12     | 36     | —       | 46    | 12      | 35      | —        | 1133.2259                  | 49.4                  | -1                         | II                     |
| 45   | 9      | 37     | +       | 44    | 9       | 36      | +        | 1133.2544                  | 90.8                  | 0                          | I                      |
| 45   | 9      | 37     | —       | 44    | 9       | 36      | —        | 1133.2614                  | 90.9                  | 1                          | I                      |
| 62   | 3      | 59     | —       | 62    | 3       | 60      | —        | 1133.2711                  | 95.8                  | -8                         | II                     |
| 48   | 13     | 35     | +       | 47    | 13      | 34      | +        | 1133.3219                  | 59.1                  | 0                          | II                     |
| 48   | 13     | 35     | —       | 47    | 13      | 34      | —        | 1133.3283                  | 59.9                  | -1                         | II                     |
| 42   | 5      | 37     | +       | 41    | 5       | 36      | +        | 1133.3657                  | 82.3                  | 0                          | I                      |
| 49   | 14     | 36     | +       | 48    | 14      | 35      | +        | 1133.4001                  | 66.9                  | 2                          | II                     |
| 49   | 14     | 36     | —       | 48    | 14      | 35      | —        | 1133.4065                  | 67.2                  | 1                          | II                     |
| 45   | 4      | 42     | +       | 44    | 4       | 41      | +        | 1133.4146                  | 80.8                  | 19                         | I                      |
| 46   | 10     | 36     | +       | 45    | 10      | 35      | +        | 1133.4146                  | 80.8                  | -13                        | I                      |
| 45   | 4      | 42     | —       | 44    | 4       | 41      | —        | 1133.4146                  | 80.8                  | 8                          | I                      |
| 46   | 2      | 44     | +       | 45    | 2       | 43      | +        | 1133.4253                  | 77.4                  | 0                          | I                      |
| 46   | 2      | 44     | —       | 45    | 2       | 43      | —        | 1133.4253                  | 77.4                  | -1                         | I                      |
| 50   | 15     | 35     | +       | 49    | 15      | 34      | +        | 1133.4538                  | 74.5                  | 6                          | II                     |
| 47   | 2      | 46     | +       | 46    | 2       | 45      | +        | 1133.4583                  | 74.2                  | 1                          | I                      |
| 47   | 2      | 46     | —       | 46    | 2       | 45      | —        | 1133.4583                  | 74.2                  | 2                          | I                      |
| 44   | 7      | 37     | +       | 43    | 7       | 36      | +        | 1133.4933                  | 87.1                  | 0                          | I                      |
| 44   | 7      | 37     | —       | 43    | 7       | 36      | —        | 1133.5027                  | 87.9                  | -1                         | I                      |
| 48   | 0      | 48     | —       | 47    | 0       | 47      | —        | 1133.5244                  | 73.3                  | -1                         | I                      |
| 48   | 0      | 48     | +       | 47    | 0       | 47      | +        | 1133.5244                  | 73.3                  | -1                         | I                      |
| 45   | 8      | 38     | +       | 44    | 8       | 37      | +        | 1133.5537                  | 89.9                  | -1                         | I                      |
| 47   | 11     | 37     | +       | 46    | 11      | 36      | +        | 1133.5583                  | 41.0                  | 0                          | II                     |
| 45   | 8      | 38     | —       | 44    | 8       | 37      | —        | 1133.5609                  | 89.4                  | 1                          | I                      |
| 47   | 11     | 37     | —       | 46    | 11      | 36      | —        | 1133.5648                  | 39.6                  | -1                         | II                     |
| 63   | 4      | 60     | +       | 63    | 2       | 61      | +        | 1133.5911                  | 97.3                  | 1                          | II                     |
| 63   | 4      | 60     | —       | 63    | 2       | 61      | —        | 1133.6337                  | 99.0                  | -9                         | II                     |
| 48   | 12     | 36     | +       | 47    | 12      | 35      | +        | 1133.6797                  | 52.8                  | -1                         | II                     |
| 48   | 12     | 36     | —       | 47    | 12      | 35      | —        | 1133.6863                  | 52.7                  | -1                         | II                     |
| 46   | 9      | 37     | +       | 45    | 9       | 36      | +        | 1133.7304                  | 91.2                  | 0                          | I                      |
| 46   | 9      | 37     | —       | 45    | 9       | 36      | —        | 1133.7376                  | 91.7                  | 1                          | I                      |
| 44   | 4      | 40     | —       | 43    | 4       | 39      | —        | 1133.7442                  | 80.4                  | -2                         | I                      |
| 45   | 5      | 41     | +       | 44    | 5       | 40      | +        | 1133.7647                  | 86.5                  | -3                         | I                      |
| 45   | 5      | 41     | —       | 44    | 5       | 40      | —        | 1133.7684                  | 86.8                  | 5                          | I                      |
| 49   | 13     | 37     | +       | 48    | 13      | 36      | +        | 1133.7783                  | 61.5                  | 0                          | II                     |
| 49   | 13     | 37     | —       | 48    | 13      | 36      | —        | 1133.7848                  | 63.0                  | 0                          | II                     |
| 45   | 7      | 39     | +       | 44    | 7       | 38      | +        | 1133.8138                  | 88.8                  | -1                         | I                      |
| 45   | 7      | 39     | —       | 44    | 7       | 38      | —        | 1133.8210                  | 89.0                  | 3                          | I                      |
| 47   | 3      | 45     | +       | 46    | 3       | 44      | +        | 1133.8265                  | 79.9                  | 3                          | I                      |
| 47   | 3      | 45     | —       | 46    | 3       | 44      | —        | 1133.8265                  | 79.9                  | 1                          | I                      |
| 50   | 14     | 36     | +       | 49    | 14      | 35      | +        | 1133.8530                  | 69.7                  | 2                          | II                     |
| 48   | 1      | 47     | —       | 47    | 1       | 46      | —        | 1133.8646                  | 73.8                  | -1                         | I                      |
| 48   | 1      | 47     | +       | 47    | 1       | 46      | +        | 1133.8646                  | 73.8                  | -2                         | I                      |
| 46   | 3      | 43     | +       | 45    | 3       | 42      | +        | 1133.8646                  | 73.8                  | 28                         | I                      |
| 47   | 10     | 38     | +       | 46    | 10      | 37      | +        | 1133.8821                  | 37.6                  | -3                         | II                     |
| 47   | 10     | 38     | —       | 46    | 10      | 37      | —        | 1133.8890                  | 38.8                  | -1                         | II                     |
| 51   | 15     | 37     | +       | 50    | 15      | 36      | +        | 1133.9037                  | 76.9                  | 8                          | II                     |
| 51   | 15     | 37     | —       | 50    | 15      | 36      | —        | 1133.9102                  | 78.0                  | 5                          | II                     |
| 45   | 6      | 40     | +       | 44    | 6       | 39      | +        | 1133.9207                  | 87.6                  | -1                         | I                      |
| 45   | 6      | 40     | —       | 44    | 6       | 39      | —        | 1133.9265                  | 87.8                  | 4                          | I                      |
| 49   | 1      | 49     | +       | 48    | 1       | 48      | +        | 1133.9329                  | 75.0                  | 0                          | I                      |
| 49   | 1      | 49     | —       | 48    | 1       | 48      | —        | 1133.9329                  | 75.0                  | -1                         | I                      |
| 64   | 3      | 61     | —       | 64    | 3       | 62      | —        | 1133.9894                  | 99.2                  | -12                        | II                     |
| 48   | 11     | 37     | +       | 47    | 11      | 36      | +        | 1134.0197                  | 47.3                  | -1                         | II                     |
| 48   | 11     | 37     | —       | 47    | 11      | 36      | —        | 1134.0265                  | 48.4                  | -1                         | II                     |
| 46   | 8      | 38     | +       | 45    | 8       | 37      | +        | 1134.0643                  | 91.0                  | -1                         | I                      |
| 44   | 6      | 38     | +       | 43    | 6       | 37      | +        | 1134.0723                  | 79.0                  | 0                          | I                      |
| 46   | 8      | 38     | —       | 45    | 8       | 37      | —        | 1134.0723                  | 79.0                  | 1                          | I                      |
| 44   | 6      | 38     | —       | 43    | 6       | 37      | —        | 1134.0833                  | 87.0                  | -2                         | I                      |
| 49   | 12     | 38     | +       | 48    | 12      | 37      | +        | 1134.1367                  | 57.0                  | -1                         | II                     |
| 49   | 12     | 38     | —       | 48    | 12      | 37      | —        | 1134.1434                  | 57.5                  | -1                         | II                     |
| 47   | 9      | 39     | +       | 46    | 9       | 38      | +        | 1134.1967                  | 92.4                  | 0                          | I                      |
| 47   | 9      | 39     | —       | 46    | 9       | 38      | —        | 1134.2039                  | 92.9                  | 1                          | I                      |
| 47   | 4      | 44     | +       | 46    | 4       | 43      | +        | 1134.2197                  | 86.0                  | 13                         | I                      |
| 47   | 4      | 44     | —       | 46    | 4       | 43      | —        | 1134.2197                  | 86.0                  | 5                          | I                      |
| 48   | 2      | 46     | +       | 47    | 2       | 45      | +        | 1134.2295                  | 81.5                  | 2                          | I                      |
| 48   | 2      | 46     | —       | 47    | 2       | 45      | —        | 1134.2295                  | 81.5                  | 1                          | I                      |
| 50   | 13     | 37     | —       | 49    | 13      | 36      | —        | 1134.2380                  | 66.4                  | 0                          | II                     |
| 49   | 2      | 48     | +       | 48    | 2       | 47      | +        | 1134.2682                  | 79.0                  | 0                          | I                      |
| 49   | 2      | 48     | —       | 48    | 2       | 47      | —        | 1134.2682                  | 79.0                  | 1                          | I                      |



| $N'$ | $K'_a$ | $K'_c$ | $J'^a)$ | $N''$ | $K''_a$ | $K''_c$ | $J''^b)$ | $\nu$ , exp. <sup>c)</sup> | Transm. <sup>d)</sup> | $\delta_\nu$ <sup>e)</sup> | Spectrum <sup>f)</sup> |
|------|--------|--------|---------|-------|---------|---------|----------|----------------------------|-----------------------|----------------------------|------------------------|
|      |        | 1      |         |       |         | 2       |          | 3                          | 4                     | 5                          | 6                      |
| 44   | 5      | 39     | +       | 43    | 5       | 38      | +        | 1134.2832                  | 85.2                  | 1                          | I                      |
| 44   | 5      | 39     | —       | 43    | 5       | 38      | —        | 1134.2898                  | 85.1                  | 0                          | I                      |
| 51   | 14     | 38     | +       | 50    | 14      | 37      | +        | 1134.3026                  | 73.8                  | 3                          | II                     |
| 51   | 14     | 38     | —       | 50    | 14      | 37      | —        | 1134.3093                  | 74.6                  | 2                          | II                     |
| 50   | 0      | 50     | +       | 49    | 0       | 49      | +        | 1134.3384                  | 77.5                  | 0                          | I                      |
| 50   | 0      | 50     | —       | 49    | 0       | 49      | —        | 1134.3384                  | 77.5                  | -1                         | I                      |
| 48   | 10     | 38     | +       | 47    | 10      | 37      | +        | 1134.3463                  | 41.6                  | -2                         | II                     |
| 52   | 15     | 37     | +       | 51    | 15      | 36      | +        | 1134.3498                  | 78.9                  | 5                          | II                     |
| 48   | 10     | 38     | —       | 47    | 10      | 37      | —        | 1134.3533                  | 42.4                  | -1                         | II                     |
| 52   | 15     | 37     | —       | 51    | 15      | 36      | —        | 1134.3567                  | 80.0                  | 5                          | II                     |
| 66   | 5      | 61     | —       | 65    | 5       | 60      | —        | 1134.4181                  | 99.3                  | 5                          | II                     |
| 46   | 4      | 42     | +       | 45    | 4       | 41      | +        | 1134.4811                  | 82.1                  | 4                          | I                      |
| 46   | 4      | 42     | —       | 45    | 4       | 41      | —        | 1134.4811                  | 82.1                  | -3                         | I                      |
| 49   | 11     | 39     | —       | 48    | 11      | 38      | —        | 1134.4849                  | 46.9                  | -1                         | II                     |
| 47   | 8      | 40     | +       | 46    | 8       | 39      | +        | 1134.5002                  | 91.6                  | -4                         | I                      |
| 47   | 8      | 40     | —       | 46    | 8       | 39      | —        | 1134.5079                  | 92.5                  | 2                          | I                      |
| 46   | 7      | 39     | +       | 45    | 7       | 38      | +        | 1134.5217                  | 89.8                  | -1                         | I                      |
| 46   | 7      | 39     | —       | 45    | 7       | 38      | —        | 1134.5320                  | 90.0                  | -2                         | I                      |
| 50   | 12     | 38     | +       | 49    | 12      | 37      | +        | 1134.5895                  | 87.4                  | -13                        | I                      |
| 47   | 5      | 43     | +       | 46    | 5       | 42      | +        | 1134.5895                  | 87.4                  | -1                         | I                      |
| 47   | 5      | 43     | —       | 46    | 5       | 42      | —        | 1134.5925                  | 88.6                  | 5                          | I                      |
| 50   | 12     | 38     | —       | 49    | 12      | 37      | —        | 1134.5973                  | 59.3                  | -1                         | II                     |
| 60   | 2      | 58     | +       | 60    | 2       | 59      | +        | 1134.6198                  | 97.1                  | 7                          | II                     |
| 49   | 3      | 47     | —       | 48    | 3       | 46      | —        | 1134.6256                  | 83.5                  | 1                          | I                      |
| 49   | 3      | 47     | +       | 48    | 3       | 46      | +        | 1134.6256                  | 83.5                  | 2                          | I                      |
| 48   | 3      | 45     | +       | 47    | 3       | 44      | +        | 1134.6430                  | 85.5                  | 2                          | I                      |
| 48   | 3      | 45     | —       | 47    | 3       | 44      | —        | 1134.6430                  | 85.5                  | -2                         | I                      |
| 60   | 2      | 58     | —       | 60    | 2       | 59      | —        | 1134.6623                  | 97.2                  | -6                         | II                     |
| 48   | 9      | 39     | +       | 47    | 9       | 38      | +        | 1134.6687                  | 79.0                  | -14                        | I                      |
| 50   | 1      | 49     | +       | 49    | 1       | 48      | +        | 1134.6687                  | 79.0                  | 2                          | I                      |
| 50   | 1      | 49     | —       | 49    | 1       | 48      | —        | 1134.6687                  | 79.0                  | 3                          | I                      |
| 48   | 9      | 39     | —       | 47    | 9       | 38      | —        | 1134.6776                  | 93.6                  | 1                          | I                      |
| 51   | 13     | 39     | +       | 50    | 13      | 38      | +        | 1134.6812                  | 67.4                  | 0                          | II                     |
| 51   | 13     | 39     | —       | 50    | 13      | 38      | —        | 1134.6880                  | 69.8                  | 0                          | II                     |
| 51   | 1      | 51     | —       | 50    | 1       | 50      | —        | 1134.7407                  | 78.9                  | -1                         | I                      |
| 51   | 1      | 51     | +       | 50    | 1       | 50      | +        | 1134.7407                  | 78.9                  | 0                          | I                      |
| 47   | 7      | 41     | +       | 46    | 7       | 40      | +        | 1134.7450                  | 90.1                  | -1                         | I                      |
| 52   | 14     | 38     | +       | 51    | 14      | 37      | +        | 1134.7490                  | 73.7                  | 4                          | II                     |
| 47   | 7      | 41     | —       | 46    | 7       | 40      | —        | 1134.7521                  | 90.7                  | 3                          | I                      |
| 52   | 14     | 38     | —       | 51    | 14      | 37      | —        | 1134.7557                  | 74.9                  | 1                          | II                     |
| 47   | 6      | 42     | +       | 46    | 6       | 41      | +        | 1134.8002                  | 89.1                  | -2                         | II                     |
| 53   | 15     | 39     | —       | 52    | 15      | 38      | —        | 1134.8002                  | 17.9                  | 8                          | II                     |
| 49   | 10     | 40     | +       | 48    | 10      | 39      | +        | 1134.8060                  | 86.5                  | -7                         | I                      |
| 47   | 6      | 42     | —       | 46    | 6       | 41      | —        | 1134.8060                  | 86.5                  | 7                          | I                      |
| 49   | 10     | 40     | —       | 48    | 10      | 39      | —        | 1134.8136                  | 94.5                  | -1                         | I                      |
| 50   | 11     | 39     | +       | 49    | 11      | 38      | +        | 1134.9333                  | 55.7                  | -2                         | II                     |
| 50   | 11     | 39     | —       | 49    | 11      | 38      | —        | 1134.9404                  | 55.9                  | -1                         | II                     |
| 49   | 4      | 46     | —       | 48    | 4       | 45      | —        | 1135.0105                  | 88.3                  | 6                          | I                      |
| 49   | 4      | 46     | +       | 48    | 4       | 45      | +        | 1135.0105                  | 88.3                  | 12                         | I                      |
| 50   | 2      | 48     | +       | 49    | 2       | 47      | +        | 1135.0216                  | 85.4                  | 0                          | I                      |
| 50   | 2      | 48     | —       | 49    | 2       | 47      | —        | 1135.0216                  | 85.4                  | 1                          | I                      |
| 48   | 8      | 40     | +       | 47    | 8       | 39      | +        | 1135.0304                  | 92.4                  | -1                         | I                      |
| 51   | 12     | 40     | +       | 50    | 12      | 39      | +        | 1135.0391                  | 32.7                  | -21                        | II                     |
| 48   | 8      | 40     | —       | 47    | 8       | 39      | —        | 1135.0393                  | 92.0                  | 2                          | I                      |
| 51   | 12     | 40     | —       | 50    | 12      | 39      | —        | 1135.0481                  | 64.8                  | 0                          | II                     |
| 51   | 2      | 50     | +       | 50    | 2       | 49      | +        | 1135.0657                  | 82.9                  | 0                          | I                      |
| 51   | 2      | 50     | —       | 50    | 2       | 49      | —        | 1135.0657                  | 82.9                  | 1                          | I                      |
| 46   | 6      | 40     | +       | 45    | 6       | 39      | +        | 1135.1078                  | 88.9                  | 1                          | I                      |
| 46   | 6      | 40     | —       | 45    | 6       | 39      | —        | 1135.1184                  | 89.6                  | -3                         | I                      |
| 49   | 9      | 41     | +       | 48    | 9       | 40      | +        | 1135.1273                  | 30.7                  | 1                          | II                     |
| 52   | 13     | 39     | +       | 51    | 13      | 38      | +        | 1135.1273                  | 30.7                  | -4                         | II                     |
| 46   | 5      | 41     | +       | 45    | 5       | 40      | +        | 1135.1359                  | 86.0                  | -5                         | I                      |
| 52   | 13     | 39     | —       | 51    | 13      | 38      | —        | 1135.1361                  | 12.9                  | 14                         | II                     |
| 52   | 0      | 52     | —       | 51    | 0       | 51      | —        | 1135.1402                  | 78.6                  | 1                          | I                      |
| 46   | 5      | 41     | —       | 45    | 5       | 40      | —        | 1135.1402                  | 78.6                  | -15                        | I                      |
| 52   | 0      | 52     | +       | 51    | 0       | 51      | +        | 1135.1402                  | 78.6                  | 2                          | I                      |
| 53   | 14     | 40     | +       | 52    | 14      | 39      | +        | 1135.1919                  | 79.1                  | 4                          | II                     |
| 53   | 14     | 40     | —       | 52    | 14      | 39      | —        | 1135.1989                  | 79.5                  | 3                          | II                     |
| 48   | 4      | 44     | —       | 47    | 4       | 43      | —        | 1135.2079                  | 86.1                  | -2                         | I                      |
| 48   | 4      | 44     | +       | 47    | 4       | 43      | +        | 1135.2079                  | 86.1                  | 4                          | I                      |
| 54   | 15     | 39     | —       | 53    | 15      | 38      | —        | 1135.2402                  | 85.1                  | 10                         | II                     |
| 50   | 10     | 40     | +       | 49    | 10      | 39      | +        | 1135.2651                  | 50.4                  | -3                         | II                     |

| $N'$ | $K'_a$ | $K'_c$ | $J'^a)$ | $N''$ | $K''_a$ | $K''_c$ | $J''^b)$ | $\nu$ , exp. <sup>c)</sup> | Transm. <sup>d)</sup> | $\delta_\nu$ <sup>e)</sup> | Spectrum <sup>f)</sup> |
|------|--------|--------|---------|-------|---------|---------|----------|----------------------------|-----------------------|----------------------------|------------------------|
|      |        | 1      |         |       |         | 2       |          | 3                          | 4                     | 5                          | 6                      |
| 50   | 10     | 40     | —       | 49    | 10      | 39      | —        | 1135.2724                  | 51.5                  | -1                         | II                     |
| 68   | 3      | 65     | +       | 68    | 3       | 66      | +        | 1135.3415                  | 99.6                  | 5                          | II                     |
| 62   | 2      | 60     | +       | 62    | 2       | 61      | +        | 1135.3503                  | 99.1                  | -11                        | II                     |
| 51   | 11     | 41     | +       | 50    | 11      | 40      | +        | 1135.3853                  | 59.5                  | -2                         | II                     |
| 49   | 5      | 45     | +       | 48    | 5       | 44      | +        | 1135.3910                  | 25.2                  | -2                         | II                     |
| 51   | 3      | 49     | +       | 50    | 3       | 48      | +        | 1135.4128                  | 86.4                  | 3                          | I                      |
| 51   | 3      | 49     | —       | 50    | 3       | 48      | —        | 1135.4128                  | 86.4                  | 4                          | I                      |
| 50   | 3      | 47     | +       | 49    | 3       | 46      | +        | 1135.4157                  | 88.1                  | -3                         | I                      |
| 50   | 3      | 47     | —       | 49    | 3       | 46      | —        | 1135.4157                  | 88.1                  | -6                         | I                      |
| 49   | 8      | 42     | +       | 48    | 8       | 41      | +        | 1135.4323                  | 93.6                  | 14                         | I                      |
| 49   | 8      | 42     | —       | 48    | 8       | 41      | —        | 1135.4399                  | 93.3                  | -1                         | I                      |
| 52   | 1      | 51     | +       | 51    | 1       | 50      | +        | 1135.4601                  | 84.6                  | 1                          | I                      |
| 52   | 1      | 51     | —       | 51    | 1       | 50      | —        | 1135.4601                  | 84.6                  | 3                          | I                      |
| 52   | 12     | 40     | +       | 51    | 12      | 39      | +        | 1135.4885                  | 67.9                  | -1                         | II                     |
| 52   | 12     | 40     | —       | 51    | 12      | 39      | —        | 1135.4956                  | 68.5                  | -1                         | II                     |
| 53   | 1      | 53     | +       | 52    | 1       | 52      | +        | 1135.5361                  | 83.4                  | 0                          | II                     |
| 53   | 1      | 53     | —       | 52    | 1       | 52      | —        | 1135.5361                  | 83.4                  | -2                         | II                     |
| 48   | 7      | 41     | +       | 47    | 7       | 40      | +        | 1135.5562                  | 30.1                  | -1                         | II                     |
| 48   | 7      | 41     | —       | 47    | 7       | 40      | —        | 1135.5675                  | 30.3                  | -2                         | II                     |
| 53   | 13     | 41     | +       | 52    | 13      | 40      | +        | 1135.5709                  | 71.6                  | 0                          | II                     |
| 53   | 13     | 41     | —       | 52    | 13      | 40      | —        | 1135.5781                  | 75.8                  | 1                          | II                     |
| 50   | 9      | 41     | +       | 49    | 9       | 40      | +        | 1135.6007                  | 94.8                  | 2                          | I                      |
| 50   | 9      | 41     | —       | 49    | 9       | 40      | —        | 1135.6085                  | 94.9                  | 2                          | I                      |
| 54   | 14     | 40     | +       | 53    | 14      | 39      | +        | 1135.6316                  | 80.9                  | 4                          | II                     |
| 54   | 14     | 40     | —       | 53    | 14      | 39      | —        | 1135.6387                  | 81.6                  | 4                          | II                     |
| 49   | 6      | 44     | +       | 48    | 6       | 43      | +        | 1135.6508                  | 90.7                  | 2                          | I                      |
| 49   | 7      | 43     | +       | 48    | 7       | 42      | +        | 1135.6556                  | 91.5                  | 28                         | I                      |
| 49   | 6      | 44     | —       | 48    | 6       | 43      | —        | 1135.6556                  | 91.5                  | 7                          | I                      |
| 49   | 7      | 43     | —       | 48    | 7       | 42      | —        | 1135.6597                  | 92.7                  | 3                          | I                      |
| 55   | 15     | 41     | —       | 54    | 15      | 40      | —        | 1135.6768                  | 86.9                  | 11                         | II                     |
| 51   | 10     | 42     | +       | 50    | 10      | 41      | +        | 1135.7185                  | 95.9                  | -3                         | I                      |
| 51   | 10     | 42     | —       | 50    | 10      | 41      | —        | 1135.7260                  | 95.9                  | -1                         | I                      |
| 51   | 4      | 48     | —       | 50    | 4       | 47      | —        | 1135.7863                  | 91.0                  | -6                         | I                      |
| 51   | 4      | 48     | +       | 50    | 4       | 47      | +        | 1135.7863                  | 91.0                  | -2                         | I                      |
| 52   | 2      | 50     | —       | 51    | 2       | 49      | —        | 1135.8020                  | 88.1                  | 3                          | I                      |
| 52   | 2      | 50     | +       | 51    | 2       | 49      | +        | 1135.8020                  | 88.1                  | 1                          | I                      |
| 52   | 11     | 41     | +       | 51    | 11      | 40      | +        | 1135.8344                  | 63.6                  | -2                         | II                     |
| 52   | 11     | 41     | —       | 51    | 11      | 40      | —        | 1135.8418                  | 64.2                  | -1                         | II                     |
| 53   | 2      | 52     | —       | 52    | 2       | 51      | —        | 1135.8511                  | 86.4                  | 3                          | I                      |
| 53   | 2      | 52     | +       | 52    | 2       | 51      | +        | 1135.8511                  | 86.4                  | 0                          | I                      |
| 58   | 1      | 57     | +       | 58    | 1       | 58      | +        | 1135.8628                  | 97.7                  | 8                          | II                     |
| 50   | 4      | 46     | +       | 49    | 4       | 45      | +        | 1135.9301                  | 77.6                  | 2                          | I                      |
| 50   | 4      | 46     | —       | 49    | 4       | 45      | —        | 1135.9301                  | 77.6                  | -3                         | I                      |
| 48   | 5      | 43     | —       | 47    | 5       | 42      | —        | 1135.9301                  | 77.6                  | -7                         | I                      |
| 48   | 5      | 43     | +       | 47    | 5       | 42      | +        | 1135.9301                  | 77.6                  | 31                         | I                      |
| 53   | 12     | 42     | +       | 52    | 12      | 41      | +        | 1135.9301                  | 77.6                  | -17                        | I                      |
| 54   | 0      | 54     | +       | 53    | 0       | 53      | +        | 1135.9301                  | 77.6                  | 9                          | I                      |
| 54   | 0      | 54     | —       | 53    | 0       | 53      | —        | 1135.9301                  | 77.6                  | 8                          | I                      |
| 53   | 12     | 42     | —       | 52    | 12      | 41      | —        | 1135.9398                  | 71.1                  | 0                          | II                     |
| 50   | 8      | 42     | +       | 49    | 8       | 41      | +        | 1135.9967                  | 94.0                  | -3                         | I                      |
| 50   | 8      | 42     | —       | 49    | 8       | 41      | —        | 1136.0063                  | 94.0                  | 0                          | I                      |
| 54   | 13     | 41     | +       | 53    | 13      | 40      | +        | 1136.0110                  | 77.3                  | 0                          | II                     |
| 54   | 13     | 41     | —       | 53    | 13      | 40      | —        | 1136.0182                  | 78.3                  | 1                          | II                     |
| 51   | 9      | 43     | +       | 50    | 9       | 42      | +        | 1136.0456                  | 95.4                  | 0                          | I                      |
| 51   | 9      | 43     | —       | 50    | 9       | 42      | —        | 1136.0535                  | 95.8                  | 3                          | I                      |
| 55   | 14     | 42     | +       | 54    | 14      | 41      | +        | 1136.0679                  | 83.8                  | 4                          | II                     |
| 55   | 14     | 42     | —       | 54    | 14      | 41      | —        | 1136.0752                  | 83.6                  | 5                          | II                     |
| 48   | 6      | 42     | +       | 47    | 6       | 41      | +        | 1136.0954                  | 91.4                  | 1                          | I                      |
| 48   | 6      | 42     | —       | 47    | 6       | 41      | —        | 1136.1052                  | 91.6                  | -1                         | I                      |
| 52   | 10     | 42     | +       | 51    | 10      | 41      | +        | 1136.1720                  | 89.9                  | -6                         | I                      |
| 51   | 5      | 47     | +       | 50    | 5       | 46      | +        | 1136.1720                  | 89.9                  | -2                         | I                      |
| 51   | 5      | 47     | —       | 50    | 5       | 46      | —        | 1136.1720                  | 89.9                  | -18                        | I                      |
| 52   | 3      | 49     | +       | 51    | 3       | 48      | +        | 1136.1799                  | 87.8                  | 0                          | I                      |
| 52   | 10     | 42     | —       | 51    | 10      | 41      | —        | 1136.1799                  | 87.8                  | -2                         | I                      |
| 52   | 3      | 49     | —       | 51    | 3       | 48      | —        | 1136.1799                  | 87.8                  | -1                         | I                      |
| 53   | 3      | 51     | +       | 52    | 3       | 50      | +        | 1136.1873                  | 89.6                  | 2                          | I                      |
| 53   | 3      | 51     | —       | 52    | 3       | 50      | —        | 1136.1873                  | 89.6                  | 5                          | I                      |
| 54   | 1      | 53     | —       | 53    | 1       | 52      | —        | 1136.2391                  | 87.6                  | 3                          | II                     |
| 54   | 1      | 53     | +       | 53    | 1       | 52      | +        | 1136.2391                  | 87.6                  | 0                          | II                     |
| 53   | 11     | 43     | +       | 52    | 11      | 42      | +        | 1136.2801                  | 67.4                  | -2                         | II                     |
| 53   | 11     | 43     | —       | 52    | 11      | 42      | —        | 1136.2875                  | 67.7                  | -1                         | II                     |
| 59   | 9      | 51     | —       | 59    | 7       | 52      | —        | 1136.3097                  | 99.2                  | -1                         | II                     |

| $N'$ | $K'_a$ | $K'_c$ | $J'^a)$ | $N''$ | $K''_a$ | $K''_c$ | $J''^b)$ | $\nu$ , exp. <sup>c)</sup> | Transm. <sup>d)</sup> | $\delta_\nu$ <sup>e)</sup> | Spectrum <sup>f)</sup> |
|------|--------|--------|---------|-------|---------|---------|----------|----------------------------|-----------------------|----------------------------|------------------------|
|      |        | 1      |         |       |         | 2       |          | 3                          | 4                     | 5                          | 6                      |
| 55   | 1      | 55     | +       | 54    | 1       | 54      | +        | 1136.3191                  | 87.4                  | 0                          | I                      |
| 55   | 1      | 55     | -       | 54    | 1       | 54      | -        | 1136.3191                  | 87.4                  | -2                         | I                      |
| 59   | 9      | 51     | +       | 59    | 7       | 52      | +        | 1136.3406                  | 98.6                  | 2                          | II                     |
| 51   | 8      | 44     | +       | 50    | 8       | 43      | +        | 1136.3483                  | 95.0                  | 0                          | I                      |
| 51   | 8      | 44     | -       | 50    | 8       | 43      | -        | 1136.3563                  | 94.5                  | 3                          | I                      |
| 54   | 12     | 42     | +       | 53    | 12      | 41      | +        | 1136.3735                  | 74.6                  | -2                         | II                     |
| 54   | 12     | 42     | -       | 53    | 12      | 41      | -        | 1136.3809                  | 74.1                  | 0                          | II                     |
| 55   | 13     | 43     | +       | 54    | 13      | 42      | +        | 1136.4477                  | 80.6                  | 1                          | II                     |
| 55   | 13     | 43     | -       | 54    | 13      | 42      | -        | 1136.4549                  | 80.6                  | 1                          | II                     |
| 65   | 3      | 63     | -       | 65    | 1       | 64      | -        | 1136.4656                  | 96.8                  | -4                         | II                     |
| 51   | 6      | 46     | +       | 50    | 6       | 45      | +        | 1136.4717                  | 94.2                  | -1                         | I                      |
| 51   | 6      | 46     | -       | 50    | 6       | 45      | -        | 1136.4763                  | 93.9                  | 7                          | I                      |
| 56   | 14     | 42     | +       | 55    | 14      | 41      | +        | 1136.5007                  | 83.8                  | 4                          | II                     |
| 56   | 14     | 42     | -       | 55    | 14      | 41      | -        | 1136.5082                  | 85.6                  | 5                          | II                     |
| 52   | 9      | 43     | +       | 51    | 9       | 42      | +        | 1136.5230                  | 55.3                  | 0                          | II                     |
| 52   | 9      | 43     | -       | 51    | 9       | 42      | -        | 1136.5315                  | 53.9                  | 3                          | II                     |
| 57   | 15     | 43     | +       | 56    | 15      | 42      | +        | 1136.5315                  | 53.9                  | 5                          | II                     |
| 51   | 7      | 45     | +       | 50    | 7       | 44      | +        | 1136.5345                  | 94.0                  | -1                         | I                      |
| 51   | 7      | 45     | -       | 50    | 7       | 44      | -        | 1136.5413                  | 93.9                  | 4                          | I                      |
| 53   | 4      | 50     | +       | 52    | 4       | 49      | +        | 1136.5503                  | 34.9                  | -1                         | II                     |
| 53   | 4      | 50     | -       | 52    | 4       | 49      | -        | 1136.5503                  | 34.9                  | -3                         | II                     |
| 54   | 2      | 52     | +       | 53    | 2       | 51      | +        | 1136.5701                  | 90.6                  | -1                         | I                      |
| 54   | 2      | 52     | -       | 53    | 2       | 51      | -        | 1136.5701                  | 90.6                  | 3                          | I                      |
| 50   | 7      | 43     | +       | 49    | 7       | 42      | +        | 1136.5901                  | 39.4                  | -1                         | II                     |
| 50   | 7      | 43     | -       | 49    | 7       | 42      | -        | 1136.6020                  | 40.3                  | -4                         | II                     |
| 60   | 1      | 59     | +       | 60    | 1       | 60      | +        | 1136.6134                  | 97.6                  | -9                         | II                     |
| 53   | 10     | 44     | +       | 52    | 10      | 43      | +        | 1136.6186                  | 96.7                  | -4                         | I                      |
| 55   | 2      | 54     | +       | 54    | 2       | 53      | +        | 1136.6240                  | 88.3                  | 0                          | I                      |
| 55   | 2      | 54     | -       | 54    | 2       | 53      | -        | 1136.6240                  | 88.3                  | 3                          | I                      |
| 52   | 4      | 48     | +       | 51    | 4       | 47      | +        | 1136.6527                  | 35.2                  | 0                          | II                     |
| 52   | 4      | 48     | -       | 51    | 4       | 47      | -        | 1136.6527                  | 35.2                  | -4                         | II                     |
| 50   | 5      | 45     | +       | 49    | 5       | 44      | +        | 1136.6623                  | 34.7                  | 0                          | II                     |
| 50   | 5      | 45     | -       | 49    | 5       | 44      | -        | 1136.6651                  | 33.2                  | 4                          | II                     |
| 56   | 0      | 56     | +       | 55    | 0       | 55      | +        | 1136.7060                  | 88.6                  | -1                         | I                      |
| 56   | 0      | 56     | -       | 55    | 0       | 55      | -        | 1136.7060                  | 88.6                  | -1                         | I                      |
| 54   | 11     | 43     | +       | 53    | 11      | 42      | +        | 1136.7231                  | 70.9                  | -2                         | II                     |
| 54   | 11     | 43     | -       | 53    | 11      | 42      | -        | 1136.7307                  | 71.5                  | 0                          | II                     |
| 55   | 12     | 44     | +       | 54    | 12      | 43      | +        | 1136.8111                  | 77.7                  | -2                         | II                     |
| 55   | 12     | 44     | -       | 54    | 12      | 43      | -        | 1136.8187                  | 77.8                  | 1                          | II                     |
| 56   | 13     | 43     | +       | 55    | 13      | 42      | +        | 1136.8810                  | 83.1                  | 1                          | II                     |
| 56   | 13     | 43     | -       | 55    | 13      | 42      | -        | 1136.8885                  | 82.8                  | 2                          | II                     |
| 53   | 5      | 49     | +       | 52    | 5       | 48      | +        | 1136.9343                  | 88.3                  | -4                         | I                      |
| 54   | 3      | 51     | -       | 53    | 3       | 50      | -        | 1136.9343                  | 88.3                  | 9                          | I                      |
| 54   | 3      | 51     | +       | 53    | 3       | 50      | +        | 1136.9343                  | 19.0                  | 9                          | II                     |
| 57   | 14     | 44     | -       | 56    | 14      | 43      | -        | 1136.9371                  | 39.0                  | -2                         | II                     |
| 55   | 3      | 53     | -       | 54    | 3       | 52      | -        | 1136.9498                  | 90.4                  | 8                          | I                      |
| 55   | 3      | 53     | +       | 54    | 3       | 52      | +        | 1136.9498                  | 90.4                  | 4                          | I                      |
| 53   | 9      | 45     | -       | 52    | 9       | 44      | -        | 1136.9593                  | 53.1                  | 3                          | II                     |
| 52   | 8      | 44     | +       | 51    | 8       | 43      | +        | 1136.9667                  | 94.4                  | -4                         | I                      |
| 52   | 8      | 44     | -       | 51    | 8       | 43      | -        | 1136.9771                  | 95.7                  | -3                         | I                      |
| 56   | 1      | 55     | -       | 55    | 1       | 54      | -        | 1137.0058                  | 90.1                  | 4                          | II                     |
| 56   | 1      | 55     | +       | 55    | 1       | 54      | +        | 1137.0058                  | 90.1                  | 0                          | II                     |
| 50   | 6      | 44     | +       | 49    | 6       | 43      | +        | 1137.0242                  | 93.5                  | 1                          | II                     |
| 50   | 6      | 44     | -       | 49    | 6       | 43      | -        | 1137.0333                  | 93.0                  | -15                        | I                      |
| 54   | 10     | 44     | +       | 53    | 10      | 43      | +        | 1137.0683                  | 67.6                  | -4                         | II                     |
| 54   | 10     | 44     | -       | 53    | 10      | 43      | -        | 1137.0764                  | 67.6                  | -1                         | II                     |
| 57   | 1      | 57     | -       | 56    | 1       | 56      | -        | 1137.0898                  | 90.0                  | -1                         | I                      |
| 57   | 1      | 57     | +       | 56    | 1       | 56      | +        | 1137.0898                  | 90.0                  | 0                          | I                      |
| 55   | 11     | 45     | +       | 54    | 11      | 44      | +        | 1137.1623                  | 74.1                  | -3                         | II                     |
| 67   | 3      | 65     | -       | 67    | 1       | 66      | -        | 1137.1623                  | 74.1                  | -6                         | II                     |
| 55   | 11     | 45     | -       | 54    | 11      | 44      | -        | 1137.1701                  | 73.8                  | 0                          | II                     |
| 56   | 12     | 44     | +       | 55    | 12      | 43      | +        | 1137.2456                  | 45.5                  | -1                         | II                     |
| 53   | 8      | 46     | +       | 52    | 8       | 45      | +        | 1137.2456                  | 45.5                  | -1                         | II                     |
| 53   | 8      | 46     | -       | 52    | 8       | 45      | -        | 1137.2534                  | 46.5                  | 2                          | II                     |
| 56   | 12     | 44     | -       | 55    | 12      | 43      | -        | 1137.2534                  | 46.5                  | 2                          | II                     |
| 53   | 6      | 48     | +       | 52    | 6       | 47      | +        | 1137.2651                  | 95.2                  | 0                          | I                      |
| 53   | 6      | 48     | -       | 52    | 6       | 47      | -        | 1137.2692                  | 95.3                  | 9                          | I                      |
| 55   | 4      | 52     | -       | 54    | 4       | 51      | -        | 1137.3017                  | 46.5                  | 0                          | II                     |
| 55   | 4      | 52     | +       | 54    | 4       | 51      | +        | 1137.3017                  | 46.5                  | 0                          | II                     |
| 57   | 13     | 45     | +       | 56    | 13      | 44      | +        | 1137.3110                  | 83.8                  | 1                          | II                     |
| 57   | 13     | 45     | -       | 56    | 13      | 44      | -        | 1137.3186                  | 84.9                  | 3                          | II                     |
| 56   | 2      | 54     | +       | 55    | 2       | 53      | +        | 1137.3263                  | 92.7                  | 2                          | I                      |

| $N'$ | $K'_a$ | $K'_c$ | $J'^a)$ | $N''$ | $K''_a$ | $K''_c$ | $J''^b)$ | $\nu$ , exp. <sup>c)</sup> | Transm. <sup>d)</sup> | $\delta_\nu$ <sup>e)</sup> | Spectrum <sup>f)</sup> |
|------|--------|--------|---------|-------|---------|---------|----------|----------------------------|-----------------------|----------------------------|------------------------|
|      |        | 1      |         |       |         | 2       |          | 3                          | 4                     | 5                          | 6                      |
| 56   | 2      | 54     | —       | 55    | 2       | 53      | —        | 1137.3263                  | 92.7                  | 7                          | I                      |
| 52   | 5      | 47     | +       | 51    | 5       | 46      | +        | 1137.3555                  | 38.9                  | 4                          | II                     |
| 52   | 5      | 47     | —       | 51    | 5       | 46      | —        | 1137.3570                  | 36.9                  | 5                          | II                     |
| 54   | 4      | 50     | +       | 53    | 4       | 49      | +        | 1137.3719                  | 46.7                  | -1                         | II                     |
| 54   | 4      | 50     | —       | 53    | 4       | 49      | —        | 1137.3736                  | 46.9                  | 12                         | II                     |
| 57   | 2      | 56     | +       | 56    | 2       | 55      | +        | 1137.3844                  | 91.6                  | -2                         | I                      |
| 57   | 2      | 56     | —       | 56    | 2       | 55      | —        | 1137.3844                  | 91.6                  | 3                          | I                      |
| 53   | 7      | 47     | +       | 52    | 7       | 46      | +        | 1137.3883                  | 49.2                  | -1                         | II                     |
| 53   | 7      | 47     | —       | 52    | 7       | 46      | —        | 1137.3948                  | 51.0                  | 6                          | II                     |
| 54   | 9      | 45     | +       | 53    | 9       | 44      | +        | 1137.4392                  | 64.4                  | 0                          | II                     |
| 54   | 9      | 45     | —       | 53    | 9       | 44      | —        | 1137.4482                  | 64.8                  | 3                          | II                     |
| 58   | 0      | 58     | —       | 57    | 0       | 57      | —        | 1137.4704                  | 91.5                  | 0                          | I                      |
| 58   | 0      | 58     | +       | 57    | 0       | 57      | +        | 1137.4704                  | 91.5                  | 0                          | I                      |
| 68   | 2      | 66     | —       | 68    | 2       | 67      | —        | 1137.5064                  | 71.3                  | 3                          | II                     |
| 55   | 10     | 46     | +       | 54    | 10      | 45      | +        | 1137.5066                  | 71.3                  | -4                         | II                     |
| 55   | 10     | 46     | —       | 54    | 10      | 45      | —        | 1137.5146                  | 71.9                  | -2                         | II                     |
| 56   | 11     | 45     | +       | 55    | 11      | 44      | +        | 1137.5994                  | 77.5                  | -3                         | II                     |
| 52   | 7      | 45     | —       | 51    | 7       | 44      | —        | 1137.6219                  | 49.8                  | -2                         | II                     |
| 56   | 3      | 53     | +       | 55    | 3       | 52      | +        | 1137.6767                  | 43.2                  | 7                          | II                     |
| 56   | 3      | 53     | —       | 55    | 3       | 52      | —        | 1137.6767                  | 43.2                  | 10                         | II                     |
| 57   | 12     | 46     | +       | 56    | 12      | 45      | +        | 1137.6767                  | 43.2                  | -1                         | II                     |
| 55   | 5      | 51     | +       | 54    | 5       | 50      | +        | 1137.6800                  | 53.6                  | -4                         | II                     |
| 55   | 5      | 51     | —       | 54    | 5       | 50      | —        | 1137.6800                  | 53.6                  | -12                        | II                     |
| 57   | 12     | 46     | —       | 56    | 12      | 45      | —        | 1137.6828                  | 52.2                  | -15                        | II                     |
| 57   | 3      | 55     | —       | 56    | 3       | 54      | —        | 1137.6995                  | 42.1                  | 8                          | II                     |
| 57   | 3      | 55     | +       | 56    | 3       | 54      | +        | 1137.6995                  | 42.1                  | 2                          | II                     |
| 58   | 13     | 45     | +       | 57    | 13      | 44      | +        | 1137.7377                  | 86.9                  | 1                          | II                     |
| 58   | 1      | 57     | +       | 57    | 1       | 56      | +        | 1137.7601                  | 34.4                  | -1                         | II                     |
| 58   | 1      | 57     | —       | 57    | 1       | 56      | —        | 1137.7601                  | 34.4                  | 5                          | II                     |
| 59   | 14     | 46     | +       | 58    | 14      | 45      | +        | 1137.7793                  | 90.6                  | 5                          | II                     |
| 55   | 9      | 47     | +       | 54    | 9       | 46      | +        | 1137.8432                  | 67.6                  | -1                         | II                     |
| 59   | 1      | 59     | +       | 58    | 1       | 58      | +        | 1137.8478                  | 92.3                  | 0                          | I                      |
| 59   | 1      | 59     | —       | 58    | 1       | 58      | —        | 1137.8478                  | 92.3                  | -1                         | I                      |
| 55   | 9      | 47     | —       | 54    | 9       | 46      | —        | 1137.8514                  | 66.7                  | 5                          | II                     |
| 52   | 6      | 46     | +       | 51    | 6       | 45      | +        | 1137.8881                  | 46.5                  | 1                          | II                     |
| 52   | 6      | 46     | —       | 51    | 6       | 45      | —        | 1137.8955                  | 46.8                  | -1                         | II                     |
| 54   | 8      | 46     | +       | 53    | 8       | 45      | +        | 1137.9432                  | 61.4                  | -3                         | II                     |
| 56   | 10     | 46     | +       | 55    | 10      | 45      | +        | 1137.9542                  | 49.3                  | 0                          | II                     |
| 54   | 8      | 46     | —       | 53    | 8       | 45      | —        | 1137.9542                  | 49.3                  | -6                         | II                     |
| 56   | 10     | 46     | —       | 55    | 10      | 45      | —        | 1137.9621                  | 74.6                  | -2                         | II                     |
| 54   | 5      | 49     | —       | 53    | 5       | 48      | —        | 1138.0225                  | 47.1                  | -2                         | II                     |
| 54   | 5      | 49     | +       | 53    | 5       | 48      | +        | 1138.0225                  | 47.1                  | 5                          | II                     |
| 57   | 11     | 47     | +       | 56    | 11      | 46      | +        | 1138.0322                  | 47.9                  | -1                         | II                     |
| 55   | 6      | 50     | +       | 54    | 6       | 49      | +        | 1138.0322                  | 47.9                  | -3                         | II                     |
| 57   | 11     | 47     | —       | 56    | 11      | 46      | —        | 1138.0405                  | 50.4                  | 5                          | II                     |
| 57   | 4      | 54     | —       | 56    | 4       | 53      | —        | 1138.0405                  | 50.4                  | 5                          | II                     |
| 57   | 4      | 54     | +       | 56    | 4       | 53      | +        | 1138.0405                  | 50.4                  | 1                          | II                     |
| 58   | 2      | 56     | —       | 57    | 2       | 55      | —        | 1138.0700                  | 94.4                  | 10                         | I                      |
| 58   | 2      | 56     | +       | 57    | 2       | 55      | +        | 1138.0700                  | 94.4                  | 2                          | I                      |
| 56   | 4      | 52     | +       | 55    | 4       | 51      | +        | 1138.0868                  | 57.8                  | -1                         | II                     |
| 56   | 4      | 52     | —       | 55    | 4       | 51      | —        | 1138.0868                  | 57.8                  | -3                         | II                     |
| 58   | 12     | 46     | +       | 57    | 12      | 45      | +        | 1138.1047                  | 84.1                  | -1                         | II                     |
| 58   | 12     | 46     | —       | 57    | 12      | 45      | —        | 1138.1126                  | 85.2                  | 1                          | II                     |
| 55   | 8      | 48     | +       | 54    | 8       | 47      | +        | 1138.1217                  | 64.5                  | 0                          | II                     |
| 55   | 8      | 48     | —       | 54    | 8       | 47      | —        | 1138.1297                  | 64.8                  | 6                          | II                     |
| 59   | 2      | 58     | +       | 58    | 2       | 57      | +        | 1138.1325                  | 38.4                  | -1                         | II                     |
| 59   | 2      | 58     | —       | 58    | 2       | 57      | —        | 1138.1325                  | 38.4                  | 6                          | II                     |
| 59   | 13     | 47     | +       | 58    | 13      | 46      | +        | 1138.1610                  | 88.1                  | 2                          | II                     |
| 59   | 13     | 47     | —       | 58    | 13      | 46      | —        | 1138.1689                  | 89.0                  | 5                          | II                     |
| 70   | 2      | 68     | —       | 70    | 2       | 69      | —        | 1138.1829                  | 98.2                  | 9                          | II                     |
| 55   | 7      | 49     | +       | 54    | 7       | 48      | +        | 1138.2127                  | 60.5                  | 0                          | II                     |
| 55   | 7      | 49     | —       | 54    | 7       | 48      | —        | 1138.2189                  | 61.5                  | 8                          | II                     |
| 60   | 0      | 60     | —       | 59    | 0       | 59      | —        | 1138.2221                  | 93.2                  | -1                         | I                      |
| 60   | 0      | 60     | +       | 59    | 0       | 59      | +        | 1138.2221                  | 93.2                  | -1                         | I                      |
| 56   | 9      | 47     | +       | 55    | 9       | 46      | +        | 1138.3518                  | 72.1                  | 1                          | II                     |
| 56   | 9      | 47     | —       | 55    | 9       | 46      | —        | 1138.3614                  | 72.4                  | 3                          | II                     |
| 57   | 10     | 48     | +       | 56    | 10      | 47      | +        | 1138.3820                  | 77.5                  | -5                         | II                     |
| 57   | 10     | 48     | —       | 56    | 10      | 47      | —        | 1138.3903                  | 77.1                  | -2                         | II                     |
| 58   | 3      | 55     | +       | 57    | 3       | 54      | +        | 1138.4069                  | 60.6                  | -1                         | II                     |
| 58   | 3      | 55     | —       | 57    | 3       | 54      | —        | 1138.4069                  | 60.6                  | 4                          | II                     |
| 57   | 5      | 53     | —       | 56    | 5       | 52      | —        | 1138.4105                  | 61.2                  | -9                         | II                     |
| 57   | 5      | 53     | +       | 56    | 5       | 52      | +        | 1138.4105                  | 61.2                  | -5                         | II                     |

| $N'$ | $K'_a$ | $K'_c$ | $J'^a)$ | $N''$ | $K''_a$ | $K''_c$ | $J''^b)$ | $\nu$ , exp. <sup>c)</sup> | Transm. <sup>d)</sup> | $\delta_\nu$ <sup>e)</sup> | Spectrum <sup>f)</sup> |
|------|--------|--------|---------|-------|---------|---------|----------|----------------------------|-----------------------|----------------------------|------------------------|
|      |        | 1      |         |       |         | 2       |          | 3                          | 4                     | 5                          | 6                      |
| 59   | 3      | 57     | —       | 58    | 3       | 56      | —        | 1138.4369                  | 51.2                  | 9                          | II                     |
| 59   | 3      | 57     | +       | 58    | 3       | 56      | +        | 1138.4369                  | 51.2                  | 0                          | II                     |
| 58   | 11     | 47     | +       | 57    | 11      | 46      | +        | 1138.4634                  | 81.8                  | -4                         | II                     |
| 58   | 11     | 47     | —       | 57    | 11      | 46      | —        | 1138.4716                  | 82.7                  | 0                          | II                     |
| 71   | 3      | 69     | +       | 71    | 1       | 70      | +        | 1138.4773                  | 98.9                  | 2                          | II                     |
| 60   | 1      | 59     | +       | 59    | 1       | 58      | +        | 1138.5018                  | 45.1                  | -1                         | II                     |
| 60   | 1      | 59     | —       | 59    | 1       | 58      | —        | 1138.5018                  | 45.1                  | 7                          | II                     |
| 71   | 3      | 69     | —       | 71    | 1       | 70      | —        | 1138.5146                  | 99.0                  | -3                         | II                     |
| 59   | 12     | 48     | +       | 58    | 12      | 47      | +        | 1138.5292                  | 87.0                  | -2                         | II                     |
| 59   | 12     | 48     | —       | 58    | 12      | 47      | —        | 1138.5373                  | 86.9                  | 2                          | II                     |
| 60   | 13     | 47     | —       | 59    | 13      | 46      | —        | 1138.5890                  | 90.4                  | 6                          | II                     |
| 61   | 1      | 61     | +       | 60    | 1       | 60      | +        | 1138.5933                  | 94.1                  | 0                          | II                     |
| 61   | 1      | 61     | —       | 60    | 1       | 60      | —        | 1138.5933                  | 94.1                  | -1                         | II                     |
| 54   | 7      | 47     | +       | 53    | 7       | 46      | +        | 1138.5970                  | 57.6                  | -1                         | II                     |
| 54   | 7      | 47     | —       | 53    | 7       | 46      | —        | 1138.6088                  | 59.3                  | -4                         | II                     |
| 56   | 5      | 51     | +       | 55    | 5       | 50      | +        | 1138.6773                  | 57.2                  | 5                          | II                     |
| 56   | 5      | 51     | —       | 55    | 5       | 50      | —        | 1138.6773                  | 57.2                  | 2                          | II                     |
| 54   | 6      | 48     | +       | 53    | 6       | 47      | +        | 1138.6846                  | 55.2                  | 2                          | II                     |
| 57   | 9      | 49     | +       | 56    | 9       | 48      | +        | 1138.7200                  | 74.7                  | 2                          | II                     |
| 57   | 9      | 49     | —       | 56    | 9       | 48      | —        | 1138.7285                  | 75.3                  | 8                          | II                     |
| 59   | 4      | 56     | +       | 58    | 4       | 55      | +        | 1138.7663                  | 65.2                  | -4                         | II                     |
| 59   | 4      | 56     | —       | 58    | 4       | 55      | —        | 1138.7663                  | 65.2                  | 3                          | II                     |
| 57   | 6      | 52     | +       | 56    | 6       | 51      | +        | 1138.7758                  | 67.4                  | -2                         | II                     |
| 66   | 1      | 65     | +       | 66    | 1       | 66      | +        | 1138.7950                  | 66.6                  | 23                         | II                     |
| 58   | 4      | 54     | —       | 57    | 4       | 53      | —        | 1138.7950                  | 66.6                  | -2                         | II                     |
| 58   | 4      | 54     | +       | 57    | 4       | 53      | +        | 1138.7950                  | 66.6                  | -2                         | II                     |
| 60   | 2      | 58     | +       | 59    | 2       | 57      | +        | 1138.8011                  | 56.1                  | 1                          | II                     |
| 60   | 2      | 58     | —       | 59    | 2       | 57      | —        | 1138.8011                  | 56.1                  | 11                         | II                     |
| 58   | 10     | 48     | +       | 57    | 10      | 47      | +        | 1138.8289                  | 98.5                  | -11                        | I                      |
| 58   | 10     | 48     | —       | 57    | 10      | 47      | —        | 1138.8381                  | 80.8                  | -3                         | II                     |
| 61   | 2      | 60     | —       | 60    | 2       | 59      | —        | 1138.8678                  | 50.3                  | 6                          | II                     |
| 61   | 2      | 60     | +       | 60    | 2       | 59      | +        | 1138.8680                  | 50.3                  | -1                         | II                     |
| 59   | 11     | 49     | +       | 58    | 11      | 48      | +        | 1138.8890                  | 84.6                  | -4                         | II                     |
| 59   | 11     | 49     | —       | 58    | 11      | 48      | —        | 1138.8973                  | 84.8                  | 0                          | II                     |
| 56   | 8      | 48     | +       | 55    | 8       | 47      | +        | 1138.9252                  | 69.5                  | -3                         | II                     |
| 56   | 8      | 48     | —       | 55    | 8       | 47      | —        | 1138.9374                  | 69.8                  | -4                         | II                     |
| 60   | 12     | 48     | +       | 59    | 12      | 47      | +        | 1138.9509                  | 89.1                  | -1                         | II                     |
| 62   | 0      | 62     | —       | 61    | 0       | 61      | —        | 1138.9613                  | 94.6                  | 0                          | I                      |
| 62   | 0      | 62     | +       | 61    | 0       | 61      | +        | 1138.9613                  | 94.6                  | -1                         | I                      |
| 57   | 8      | 50     | +       | 56    | 8       | 49      | +        | 1138.9740                  | 72.7                  | 0                          | II                     |
| 57   | 8      | 50     | —       | 56    | 8       | 49      | —        | 1138.9815                  | 73.2                  | 4                          | II                     |
| 61   | 13     | 49     | +       | 60    | 13      | 48      | +        | 1138.9978                  | 91.4                  | 3                          | II                     |
| 57   | 7      | 51     | +       | 56    | 7       | 50      | +        | 1139.0070                  | 68.3                  | -1                         | II                     |
| 57   | 7      | 51     | —       | 56    | 7       | 50      | —        | 1139.0129                  | 70.7                  | 12                         | II                     |
| 59   | 5      | 55     | —       | 58    | 5       | 54      | —        | 1139.1270                  | 50.0                  | -3                         | II                     |
| 59   | 5      | 55     | +       | 58    | 5       | 54      | +        | 1139.1270                  | 50.0                  | -3                         | II                     |
| 61   | 3      | 59     | —       | 60    | 3       | 58      | —        | 1139.1620                  | 60.9                  | 12                         | II                     |
| 61   | 3      | 59     | +       | 60    | 3       | 58      | +        | 1139.1620                  | 60.9                  | 1                          | II                     |
| 62   | 1      | 61     | —       | 61    | 1       | 60      | —        | 1139.2310                  | 55.6                  | 9                          | II                     |
| 62   | 1      | 61     | +       | 61    | 1       | 60      | +        | 1139.2310                  | 55.6                  | 0                          | II                     |
| 59   | 10     | 50     | +       | 58    | 10      | 49      | +        | 1139.2445                  | 82.7                  | -7                         | II                     |
| 59   | 10     | 50     | —       | 58    | 10      | 49      | —        | 1139.2532                  | 83.3                  | -4                         | II                     |
| 58   | 9      | 49     | +       | 57    | 9       | 48      | +        | 1139.2638                  | 77.7                  | 0                          | II                     |
| 58   | 9      | 49     | —       | 57    | 9       | 48      | —        | 1139.2741                  | 78.7                  | 3                          | II                     |
| 60   | 11     | 49     | +       | 59    | 11      | 48      | +        | 1139.3154                  | 86.5                  | -4                         | II                     |
| 63   | 1      | 63     | —       | 62    | 1       | 62      | —        | 1139.3262                  | 50.6                  | 0                          | II                     |
| 63   | 1      | 63     | +       | 62    | 1       | 62      | +        | 1139.3262                  | 50.6                  | 1                          | II                     |
| 60   | 11     | 49     | —       | 59    | 11      | 48      | —        | 1139.3262                  | 50.6                  | 24                         | II                     |
| 58   | 5      | 53     | +       | 57    | 5       | 52      | +        | 1139.3300                  | 68.2                  | 19                         | II                     |
| 61   | 12     | 50     | +       | 60    | 12      | 49      | +        | 1139.3687                  | 90.4                  | -2                         | II                     |
| 61   | 12     | 50     | —       | 60    | 12      | 49      | —        | 1139.3770                  | 90.1                  | 3                          | II                     |
| 62   | 13     | 49     | +       | 61    | 13      | 48      | +        | 1139.4111                  | 92.7                  | 3                          | II                     |
| 56   | 6      | 50     | +       | 55    | 6       | 49      | +        | 1139.4154                  | 65.2                  | 2                          | II                     |
| 56   | 6      | 50     | —       | 55    | 6       | 49      | —        | 1139.4199                  | 61.7                  | 4                          | II                     |
| 61   | 4      | 58     | +       | 60    | 4       | 57      | +        | 1139.4802                  | 72.3                  | -2                         | II                     |
| 60   | 4      | 56     | —       | 59    | 4       | 55      | —        | 1139.4951                  | 74.1                  | 2                          | II                     |
| 60   | 4      | 56     | +       | 59    | 4       | 55      | +        | 1139.4952                  | 74.1                  | -1                         | II                     |
| 59   | 6      | 54     | +       | 58    | 6       | 53      | +        | 1139.4975                  | 57.3                  | -4                         | II                     |
| 62   | 2      | 60     | +       | 61    | 2       | 59      | +        | 1139.5198                  | 65.8                  | 1                          | II                     |
| 68   | 1      | 67     | —       | 68    | 1       | 68      | —        | 1139.5314                  | 98.8                  | 0                          | II                     |
| 56   | 7      | 49     | +       | 55    | 7       | 48      | +        | 1139.5360                  | 66.6                  | 0                          | II                     |
| 56   | 7      | 49     | —       | 55    | 7       | 48      | —        | 1139.5469                  | 67.3                  | -1                         | II                     |

| $N'$ | $K'_a$ | $K'_c$ | $J'^a)$ | $N''$ | $K''_a$ | $K''_c$ | $J''^b)$ | $\nu$ , exp. <sup>c)</sup> | Transm. <sup>d)</sup> | $\delta_\nu$ <sup>e)</sup> | Spectrum <sup>f)</sup> |
|------|--------|--------|---------|-------|---------|---------|----------|----------------------------|-----------------------|----------------------------|------------------------|
|      |        | 1      |         |       |         | 2       |          | 3                          | 4                     | 5                          | 6                      |
| 63   | 2      | 62     | —       | 62    | 2       | 61      | —        | 1139.5908                  | 59.0                  | 10                         | II                     |
| 63   | 2      | 62     | +       | 62    | 2       | 61      | +        | 1139.5908                  | 59.0                  | -1                         | II                     |
| 64   | 0      | 64     | —       | 63    | 0       | 63      | —        | 1139.6879                  | 58.5                  | 0                          | II                     |
| 64   | 0      | 64     | +       | 63    | 0       | 63      | +        | 1139.6879                  | 58.5                  | -1                         | II                     |
| 60   | 10     | 50     | +       | 59    | 10      | 49      | +        | 1139.6962                  | 85.3                  | -9                         | II                     |
| 60   | 10     | 50     | —       | 59    | 10      | 49      | —        | 1139.7053                  | 85.2                  | -5                         | II                     |
| 61   | 11     | 51     | +       | 60    | 11      | 50      | +        | 1139.7333                  | 88.6                  | -5                         | II                     |
| 61   | 11     | 51     | —       | 60    | 11      | 50      | —        | 1139.7420                  | 88.5                  | 1                          | II                     |
| 59   | 7      | 53     | +       | 58    | 7       | 52      | +        | 1139.7719                  | 76.5                  | 1                          | II                     |
| 62   | 12     | 50     | +       | 61    | 12      | 49      | +        | 1139.7840                  | 91.4                  | -2                         | II                     |
| 62   | 12     | 50     | —       | 61    | 12      | 49      | —        | 1139.7925                  | 91.1                  | 5                          | II                     |
| 59   | 8      | 52     | +       | 58    | 8       | 51      | +        | 1139.8000                  | 78.7                  | 1                          | II                     |
| 63   | 13     | 51     | +       | 62    | 13      | 50      | +        | 1139.8209                  | 93.3                  | 3                          | II                     |
| 61   | 5      | 57     | —       | 60    | 5       | 56      | —        | 1139.8297                  | 74.3                  | 0                          | II                     |
| 61   | 5      | 57     | +       | 60    | 5       | 56      | +        | 1139.8297                  | 74.3                  | -4                         | II                     |
| 62   | 3      | 59     | —       | 61    | 3       | 58      | —        | 1139.8326                  | 62.8                  | 5                          | II                     |
| 62   | 3      | 59     | +       | 61    | 3       | 58      | +        | 1139.8326                  | 62.8                  | -7                         | II                     |
| 63   | 3      | 61     | +       | 62    | 3       | 60      | +        | 1139.8744                  | 70.0                  | 1                          | II                     |
| 58   | 8      | 50     | +       | 57    | 8       | 49      | +        | 1139.9065                  | 76.1                  | -4                         | II                     |
| 58   | 8      | 50     | —       | 57    | 8       | 49      | —        | 1139.9194                  | 76.2                  | -6                         | II                     |
| 64   | 1      | 63     | —       | 63    | 1       | 62      | —        | 1139.9479                  | 65.9                  | 15                         | II                     |
| 64   | 1      | 63     | +       | 63    | 1       | 62      | +        | 1139.9479                  | 65.9                  | 3                          | II                     |
| 60   | 5      | 55     | —       | 59    | 5       | 54      | —        | 1139.9795                  | 76.6                  | 4                          | II                     |
| 60   | 5      | 55     | +       | 59    | 5       | 54      | +        | 1139.9795                  | 76.6                  | 3                          | II                     |
| 65   | 1      | 65     | +       | 64    | 1       | 64      | +        | 1140.0464                  | 63.2                  | 0                          | II                     |
| 65   | 1      | 65     | —       | 64    | 1       | 64      | —        | 1140.0464                  | 63.2                  | 0                          | II                     |
| 58   | 6      | 52     | +       | 57    | 6       | 51      | +        | 1140.0875                  | 73.5                  | 2                          | II                     |
| 61   | 10     | 52     | +       | 60    | 10      | 51      | +        | 1140.0936                  | 86.1                  | -10                        | II                     |
| 61   | 10     | 52     | —       | 60    | 10      | 51      | —        | 1140.1025                  | 87.4                  | -3                         | II                     |
| 61   | 10     | 52     | —       | 60    | 10      | 51      | —        | 1140.1025                  | 87.4                  | -3                         | II                     |
| 62   | 11     | 51     | +       | 61    | 11      | 50      | +        | 1140.1556                  | 90.3                  | -6                         | II                     |
| 62   | 11     | 51     | —       | 61    | 11      | 50      | —        | 1140.1644                  | 90.5                  | 1                          | II                     |
| 70   | 1      | 69     | +       | 70    | 1       | 70      | +        | 1140.1786                  | 83.6                  | 1                          | II                     |
| 60   | 9      | 51     | +       | 59    | 9       | 50      | +        | 1140.1786                  | 83.6                  | 1                          | II                     |
| 63   | 4      | 60     | —       | 62    | 4       | 59      | —        | 1140.1816                  | 78.7                  | 12                         | II                     |
| 63   | 4      | 60     | +       | 62    | 4       | 59      | +        | 1140.1816                  | 78.7                  | -2                         | II                     |
| 62   | 4      | 58     | —       | 61    | 4       | 57      | —        | 1140.1853                  | 79.8                  | 4                          | II                     |
| 62   | 4      | 58     | +       | 61    | 4       | 57      | +        | 1140.1853                  | 79.8                  | -3                         | II                     |
| 63   | 12     | 52     | +       | 62    | 12      | 51      | +        | 1140.1951                  | 92.2                  | -2                         | II                     |
| 64   | 2      | 62     | +       | 63    | 2       | 61      | +        | 1140.2261                  | 72.8                  | 1                          | II                     |
| 65   | 2      | 64     | —       | 64    | 2       | 63      | —        | 1140.3011                  | 69.7                  | 12                         | II                     |
| 65   | 2      | 64     | +       | 64    | 2       | 63      | +        | 1140.3011                  | 69.7                  | -1                         | II                     |
| 66   | 0      | 66     | +       | 65    | 0       | 65      | +        | 1140.4018                  | 67.7                  | -3                         | II                     |
| 66   | 0      | 66     | —       | 65    | 0       | 65      | —        | 1140.4018                  | 67.7                  | 1                          | II                     |
| 58   | 7      | 51     | +       | 57    | 7       | 50      | +        | 1140.4146                  | 74.2                  | 1                          | II                     |
| 58   | 7      | 51     | —       | 57    | 7       | 50      | —        | 1140.4243                  | 74.8                  | -1                         | II                     |
| 61   | 7      | 55     | +       | 60    | 7       | 54      | +        | 1140.5081                  | 82.5                  | 1                          | II                     |
| 63   | 5      | 59     | —       | 62    | 5       | 58      | —        | 1140.5196                  | 83.8                  | 6                          | II                     |
| 63   | 5      | 59     | +       | 62    | 5       | 58      | +        | 1140.5196                  | 83.8                  | -3                         | II                     |
| 64   | 3      | 61     | —       | 63    | 3       | 60      | —        | 1140.5282                  | 81.6                  | 16                         | II                     |
| 64   | 3      | 61     | +       | 63    | 3       | 60      | +        | 1140.5282                  | 81.6                  | 0                          | II                     |
| 63   | 11     | 53     | +       | 62    | 11      | 52      | +        | 1140.5654                  | 83.8                  | 0                          | II                     |
| 65   | 3      | 63     | —       | 64    | 3       | 62      | —        | 1140.5742                  | 71.9                  | 16                         | II                     |
| 65   | 3      | 63     | +       | 64    | 3       | 62      | +        | 1140.5742                  | 71.9                  | -1                         | II                     |
| 61   | 8      | 54     | +       | 60    | 8       | 53      | +        | 1140.5978                  | 84.5                  | 2                          | II                     |
| 64   | 12     | 52     | +       | 63    | 12      | 51      | +        | 1140.6050                  | 80.3                  | 5                          | II                     |
| 66   | 1      | 65     | +       | 65    | 1       | 64      | +        | 1140.6514                  | 71.2                  | -1                         | II                     |
| 60   | 6      | 54     | +       | 59    | 6       | 53      | +        | 1140.7137                  | 78.1                  | 0                          | II                     |
| 60   | 6      | 54     | —       | 59    | 6       | 53      | —        | 1140.7162                  | 79.3                  | 11                         | II                     |
| 67   | 1      | 67     | +       | 66    | 1       | 66      | +        | 1140.7539                  | 71.9                  | 0                          | II                     |
| 65   | 10     | 56     | —       | 65    | 8       | 57      | —        | 1140.7539                  | 71.9                  | -8                         | II                     |
| 67   | 1      | 67     | —       | 66    | 1       | 66      | —        | 1140.7539                  | 71.9                  | 0                          | II                     |
| 72   | 1      | 71     | +       | 72    | 1       | 72      | +        | 1140.8510                  | 99.1                  | 1                          | II                     |
| 64   | 4      | 60     | +       | 63    | 4       | 59      | +        | 1140.8654                  | 85.9                  | 0                          | II                     |
| 65   | 4      | 62     | +       | 64    | 4       | 61      | +        | 1140.8706                  | 83.9                  | -2                         | II                     |
| 60   | 8      | 52     | +       | 59    | 8       | 51      | +        | 1140.8743                  | 81.0                  | -4                         | II                     |
| 60   | 8      | 52     | —       | 59    | 8       | 51      | —        | 1140.8879                  | 76.8                  | -4                         | II                     |
| 66   | 2      | 64     | +       | 65    | 2       | 63      | +        | 1140.9197                  | 79.6                  | 1                          | II                     |
| 63   | 10     | 54     | —       | 62    | 10      | 53      | —        | 1140.9373                  | 91.0                  | -4                         | II                     |
| 64   | 11     | 53     | +       | 63    | 11      | 52      | +        | 1140.9845                  | 92.3                  | -8                         | II                     |
| 64   | 11     | 53     | —       | 63    | 11      | 52      | —        | 1140.9937                  | 92.9                  | 1                          | II                     |
| 67   | 2      | 66     | +       | 66    | 2       | 65      | +        | 1140.9986                  | 76.6                  | 0                          | II                     |

| $N'$ | $K'_a$ | $K'_c$ | $J'^a)$ | $N''$ | $K''_a$ | $K''_c$ | $J''^b)$ | $\nu$ , exp. <sup>c)</sup> | Transm. <sup>d)</sup> | $\delta_\nu$ <sup>e)</sup> | Spectrum <sup>f)</sup> |
|------|--------|--------|---------|-------|---------|---------|----------|----------------------------|-----------------------|----------------------------|------------------------|
|      |        | 1      |         |       |         | 2       |          | 3                          | 4                     | 5                          | 6                      |
| 67   | 2      | 66     | —       | 66    | 2       | 65      | —        | 1140.9986                  | 76.6                  | 14                         | II                     |
| 65   | 12     | 54     | +       | 64    | 12      | 53      | +        | 1141.0083                  | 94.1                  | -4                         | II                     |
| 68   | 0      | 68     | +       | 67    | 0       | 67      | +        | 1141.1029                  | 75.7                  | -1                         | II                     |
| 68   | 0      | 68     | —       | 67    | 0       | 67      | —        | 1141.1029                  | 75.7                  | 1                          | II                     |
| 65   | 5      | 61     | +       | 64    | 5       | 60      | +        | 1141.1969                  | 88.4                  | -1                         | II                     |
| 66   | 3      | 63     | +       | 65    | 3       | 62      | +        | 1141.2107                  | 87.0                  | 0                          | II                     |
| 63   | 7      | 57     | +       | 62    | 7       | 56      | +        | 1141.2175                  | 86.7                  | 2                          | II                     |
| 60   | 7      | 53     | +       | 59    | 7       | 52      | +        | 1141.2261                  | 80.5                  | 2                          | II                     |
| 60   | 7      | 53     | —       | 59    | 7       | 52      | —        | 1141.2345                  | 80.9                  | 2                          | II                     |
| 67   | 3      | 65     | +       | 66    | 3       | 64      | +        | 1141.2617                  | 83.1                  | 2                          | II                     |
| 64   | 5      | 59     | +       | 63    | 5       | 58      | +        | 1141.2768                  | 88.1                  | 3                          | II                     |
| 68   | 1      | 67     | —       | 67    | 1       | 66      | —        | 1141.3426                  | 79.8                  | 16                         | II                     |
| 68   | 1      | 67     | +       | 67    | 1       | 66      | +        | 1141.3426                  | 79.8                  | 0                          | II                     |
| 65   | 11     | 55     | +       | 64    | 11      | 54      | +        | 1141.3833                  | 93.9                  | -7                         | II                     |
| 65   | 11     | 55     | +       | 64    | 11      | 54      | +        | 1141.3833                  | 93.9                  | -7                         | II                     |
| 65   | 11     | 55     | —       | 64    | 11      | 54      | —        | 1141.3926                  | 94.1                  | 5                          | II                     |
| 64   | 10     | 54     | +       | 63    | 10      | 53      | +        | 1141.4113                  | 88.5                  | -17                        | II                     |
| 64   | 10     | 54     | —       | 63    | 10      | 53      | —        | 1141.4213                  | 88.7                  | -13                        | II                     |
| 69   | 1      | 69     | +       | 68    | 1       | 68      | +        | 1141.4488                  | 79.2                  | 0                          | II                     |
| 69   | 1      | 69     | —       | 68    | 1       | 68      | —        | 1141.4488                  | 79.2                  | 1                          | II                     |
| 74   | 1      | 73     | +       | 74    | 1       | 74      | +        | 1141.5095                  | 99.3                  | 4                          | II                     |
| 66   | 4      | 62     | +       | 65    | 4       | 61      | +        | 1141.5342                  | 89.4                  | 1                          | II                     |
| 67   | 4      | 64     | +       | 66    | 4       | 63      | +        | 1141.5471                  | 88.5                  | 0                          | II                     |
| 68   | 2      | 66     | +       | 67    | 2       | 65      | +        | 1141.5999                  | 86.6                  | -5                         | II                     |
| 69   | 2      | 68     | —       | 68    | 2       | 67      | —        | 1141.6835                  | 82.3                  | 17                         | II                     |
| 69   | 2      | 68     | +       | 68    | 2       | 67      | +        | 1141.6835                  | 82.3                  | 1                          | II                     |
| 65   | 10     | 56     | —       | 64    | 10      | 55      | —        | 1141.7562                  | 93.3                  | -5                         | II                     |
| 70   | 0      | 70     | +       | 69    | 0       | 69      | +        | 1141.7914                  | 81.4                  | -1                         | II                     |
| 70   | 0      | 70     | —       | 69    | 0       | 69      | —        | 1141.7914                  | 81.4                  | 2                          | II                     |
| 62   | 8      | 54     | +       | 61    | 8       | 53      | +        | 1141.8117                  | 84.1                  | 0                          | II                     |
| 62   | 8      | 54     | —       | 61    | 8       | 53      | —        | 1141.8243                  | 86.6                  | -7                         | II                     |
| 67   | 5      | 63     | +       | 66    | 5       | 62      | +        | 1141.8614                  | 91.1                  | -1                         | II                     |
| 68   | 3      | 65     | +       | 67    | 3       | 64      | +        | 1141.8811                  | 90.1                  | 4                          | II                     |
| 66   | 5      | 61     | +       | 65    | 5       | 60      | +        | 1141.9191                  | 90.9                  | 6                          | II                     |
| 69   | 3      | 67     | +       | 68    | 3       | 66      | +        | 1141.9363                  | 87.0                  | 3                          | II                     |
| 62   | 7      | 55     | +       | 61    | 7       | 54      | +        | 1141.9678                  | 85.8                  | 5                          | II                     |
| 62   | 7      | 55     | —       | 61    | 7       | 54      | —        | 1141.9748                  | 86.4                  | 9                          | II                     |
| 70   | 1      | 69     | +       | 69    | 1       | 68      | +        | 1142.0212                  | 84.7                  | 3                          | II                     |
| 70   | 1      | 69     | —       | 69    | 1       | 68      | —        | 1142.0212                  | 84.7                  | 20                         | II                     |
| 71   | 1      | 71     | +       | 70    | 1       | 70      | +        | 1142.1308                  | 84.8                  | 0                          | II                     |
| 71   | 1      | 71     | —       | 70    | 1       | 70      | —        | 1142.1308                  | 84.8                  | 1                          | II                     |
| 76   | 1      | 75     | +       | 76    | 1       | 76      | +        | 1142.1516                  | 99.2                  | -12                        | II                     |
| 70   | 2      | 68     | +       | 69    | 2       | 67      | +        | 1142.2688                  | 89.1                  | 2                          | II                     |
| 71   | 2      | 70     | +       | 70    | 2       | 69      | +        | 1142.3555                  | 87.2                  | 2                          | II                     |
| 72   | 0      | 72     | —       | 71    | 0       | 71      | —        | 1142.4670                  | 80.3                  | 2                          | II                     |
| 72   | 0      | 72     | +       | 71    | 0       | 71      | +        | 1142.4670                  | 80.3                  | -1                         | II                     |
| 69   | 5      | 65     | +       | 68    | 5       | 64      | +        | 1142.5136                  | 94.0                  | 1                          | II                     |
| 71   | 3      | 69     | +       | 70    | 3       | 68      | +        | 1142.5973                  | 90.5                  | -5                         | II                     |
| 72   | 1      | 71     | +       | 71    | 1       | 70      | +        | 1142.6866                  | 89.1                  | 2                          | II                     |
| 73   | 1      | 73     | —       | 72    | 1       | 72      | —        | 1142.7999                  | 88.7                  | 0                          | II                     |
| 73   | 1      | 73     | +       | 72    | 1       | 72      | +        | 1142.7999                  | 88.7                  | 0                          | II                     |
| 72   | 2      | 70     | —       | 71    | 2       | 69      | —        | 1142.9200                  | 99.0                  | -11                        | II                     |
| 72   | 2      | 70     | +       | 71    | 2       | 69      | +        | 1142.9244                  | 92.4                  | 5                          | II                     |
| 74   | 0      | 74     | —       | 73    | 0       | 73      | —        | 1143.1298                  | 88.1                  | 3                          | II                     |
| 74   | 0      | 74     | +       | 73    | 0       | 73      | +        | 1143.1298                  | 88.1                  | 0                          | II                     |
| 74   | 1      | 73     | +       | 73    | 1       | 72      | +        | 1143.3394                  | 90.0                  | 5                          | II                     |
| 74   | 1      | 73     | —       | 73    | 1       | 72      | —        | 1143.3394                  | 90.0                  | 22                         | II                     |
| 75   | 1      | 75     | +       | 74    | 1       | 74      | +        | 1143.4563                  | 91.6                  | 1                          | II                     |
| 75   | 1      | 75     | —       | 74    | 1       | 74      | —        | 1143.4563                  | 91.6                  | 0                          | II                     |
| 68   | 7      | 61     | +       | 68    | 7       | 62      | +        | 1143.4815                  | 95.6                  | 6                          | II                     |
| 76   | 0      | 76     | —       | 75    | 0       | 75      | —        | 1143.7797                  | 92.0                  | 3                          | II                     |
| 76   | 0      | 76     | +       | 75    | 0       | 75      | +        | 1143.7797                  | 92.0                  | 2                          | II                     |
| 76   | 1      | 75     | +       | 75    | 1       | 74      | +        | 1143.9753                  | 97.2                  | -30                        | II                     |
| 76   | 1      | 75     | +       | 75    | 1       | 74      | +        | 1143.9795                  | 94.5                  | 12                         | II                     |
| 77   | 1      | 77     | +       | 76    | 1       | 76      | +        | 1144.0995                  | 93.9                  | 1                          | II                     |
| 77   | 1      | 77     | —       | 76    | 1       | 76      | —        | 1144.0995                  | 93.9                  | -3                         | II                     |
| 78   | 0      | 78     | +       | 77    | 0       | 77      | +        | 1144.4163                  | 95.5                  | -1                         | II                     |
| 78   | 0      | 78     | —       | 77    | 0       | 77      | —        | 1144.4163                  | 95.5                  | -1                         | II                     |
| 79   | 1      | 79     | +       | 78    | 1       | 78      | +        | 1144.7300                  | 96.1                  | 3                          | II                     |
| 79   | 1      | 79     | —       | 78    | 1       | 78      | —        | 1144.7300                  | 96.1                  | -4                         | II                     |
| 80   | 0      | 80     | —       | 79    | 0       | 79      | —        | 1145.0404                  | 95.5                  | -2                         | II                     |
| 80   | 0      | 80     | +       | 79    | 0       | 79      | +        | 1145.0404                  | 95.5                  | 2                          | II                     |

| $N'$ | $K'_a$ | $K'_c$ | $J'^a)$ | $N''$ | $K''_a$ | $K''_c$ | $J''^b)$ | $\nu$ , exp. <sup>c)</sup> | Transm. <sup>d)</sup> | $\delta_\nu$ <sup>e)</sup> | Spectrum <sup>f)</sup> |
|------|--------|--------|---------|-------|---------|---------|----------|----------------------------|-----------------------|----------------------------|------------------------|
|      |        | 1      |         |       |         | 2       |          | 3                          | 4                     | 5                          | 6                      |
| 81   | 1      | 81     | +       | 80    | 1       | 80      | +        | 1145.3471                  | 96.0                  | 2                          | II                     |
| 61   | 10     | 52     | +       | 61    | 8       | 53      | +        | 1145.3474                  | 96.0                  | -5                         | II                     |
| 81   | 1      | 81     | -       | 80    | 1       | 80      | -        | 1145.3474                  | 96.0                  | -6                         | II                     |
| 61   | 10     | 52     | +       | 61    | 8       | 53      | +        | 1145.3474                  | 96.0                  | -5                         | II                     |
| 83   | 1      | 83     | +       | 82    | 1       | 82      | +        | 1145.9505                  | 97.9                  | -4                         | II                     |
| 84   | 0      | 84     | -       | 83    | 0       | 83      | -        | 1146.2512                  | 98.8                  | 11                         | II                     |
| 59   | 10     | 50     | +       | 59    | 8       | 51      | +        | 1147.3291                  | 99.1                  | 1                          | II                     |
| 34   | 3      | 31     | -       | 34    | 1       | 34      | -        | 1153.8219                  | 99.4                  | 2                          | II                     |
| 64   | 7      | 57     | +       | 64    | 7       | 58      | +        | 1154.1434                  | 99.4                  | -1                         | II                     |
| 61   | 11     | 51     | +       | 61    | 9       | 52      | +        | 1154.8096                  | 99.0                  | 0                          | II                     |
| 61   | 11     | 51     | -       | 61    | 9       | 52      | -        | 1154.8149                  | 98.9                  | -3                         | II                     |
| 66   | 7      | 59     | +       | 66    | 7       | 60      | +        | 1155.9620                  | 98.8                  | -5                         | II                     |
| 31   | 3      | 29     | -       | 30    | 1       | 30      | -        | 1156.1616                  | 99.3                  | 2                          | II                     |
| 64   | 6      | 58     | +       | 64    | 6       | 59      | +        | 1156.5042                  | 99.1                  | 3                          | II                     |
| 70   | 5      | 65     | +       | 69    | 5       | 64      | +        | 1163.2763                  | 99.4                  | 1                          | II                     |
| 66   | 7      | 59     | -       | 65    | 5       | 60      | -        | 1164.7559                  | 98.4                  | -2                         | II                     |
| 63   | 13     | 51     | -       | 63    | 11      | 52      | -        | 1167.2411                  | 99.2                  | 0                          | II                     |
| 58   | 8      | 50     | -       | 57    | 6       | 51      | -        | 1167.5384                  | 99.3                  | -11                        | II                     |
| 61   | 13     | 49     | -       | 61    | 11      | 50      | -        | 1167.9242                  | 99.2                  | -7                         | II                     |
| 60   | 8      | 52     | +       | 59    | 6       | 53      | +        | 1168.7758                  | 99.4                  | 1                          | II                     |
| 54   | 6      | 48     | -       | 53    | 4       | 49      | -        | 1171.1332                  | 98.8                  | 4                          | II                     |
| 63   | 14     | 50     | +       | 63    | 12      | 51      | +        | 1172.9989                  | 99.4                  | 1                          | II                     |
| 63   | 14     | 50     | -       | 63    | 12      | 51      | -        | 1173.0336                  | 99.4                  | 6                          | II                     |
| 61   | 14     | 48     | +       | 61    | 12      | 49      | +        | 1173.5893                  | 99.4                  | -4                         | II                     |
| 60   | 7      | 53     | -       | 59    | 5       | 54      | -        | 1173.8367                  | 99.7                  | -1                         | II                     |
| 60   | 9      | 51     | +       | 59    | 7       | 52      | +        | 1173.9664                  | 99.5                  | 1                          | II                     |
| 59   | 14     | 46     | +       | 59    | 12      | 47      | +        | 1174.1448                  | 99.1                  | 1                          | II                     |
| 58   | 9      | 49     | -       | 57    | 7       | 50      | -        | 1174.5857                  | 98.9                  | 6                          | II                     |
| 56   | 6      | 50     | +       | 55    | 4       | 51      | +        | 1174.8802                  | 99.4                  | -4                         | II                     |
| 56   | 9      | 47     | -       | 55    | 7       | 48      | -        | 1175.2881                  | 99.5                  | 8                          | II                     |
| 46   | 3      | 43     | -       | 45    | 1       | 44      | -        | 1175.8841                  | 99.6                  | 0                          | II                     |
| 49   | 5      | 45     | -       | 48    | 3       | 46      | -        | 1176.9260                  | 99.3                  | -5                         | II                     |
| 62   | 7      | 55     | +       | 61    | 5       | 56      | +        | 1177.5004                  | 99.3                  | 7                          | II                     |
| 62   | 7      | 55     | -       | 61    | 5       | 56      | -        | 1177.6161                  | 99.4                  | -5                         | II                     |
| 58   | 6      | 52     | +       | 57    | 4       | 53      | +        | 1178.7395                  | 99.4                  | 1                          | II                     |
| 59   | 15     | 45     | +       | 59    | 13      | 46      | +        | 1179.5642                  | 99.5                  | -1                         | II                     |
| 53   | 9      | 45     | -       | 52    | 7       | 46      | -        | 1179.9358                  | 99.4                  | -3                         | II                     |
| 55   | 9      | 47     | +       | 54    | 7       | 48      | +        | 1180.7608                  | 98.9                  | -7                         | II                     |
| 55   | 9      | 47     | -       | 54    | 7       | 48      | -        | 1180.7937                  | 99.4                  | 0                          | II                     |
| 49   | 15     | 35     | +       | 49    | 13      | 36      | +        | 1181.6760                  | 99.7                  | 0                          | II                     |
| 59   | 8      | 52     | +       | 58    | 6       | 53      | +        | 1181.7667                  | 99.4                  | 4                          | II                     |
| 64   | 10     | 54     | -       | 63    | 8       | 55      | -        | 1182.6619                  | 99.3                  | -5                         | II                     |
| 64   | 10     | 54     | +       | 63    | 8       | 55      | +        | 1182.6849                  | 99.1                  | -1                         | II                     |
| 64   | 7      | 57     | +       | 63    | 7       | 56      | +        | 1183.0082                  | 99.4                  | 2                          | II                     |
| 61   | 8      | 54     | +       | 60    | 6       | 55      | +        | 1183.9366                  | 99.1                  | -1                         | II                     |
| 61   | 8      | 54     | -       | 60    | 6       | 55      | -        | 1184.0074                  | 99.5                  | -3                         | II                     |
| 60   | 10     | 50     | -       | 59    | 8       | 51      | -        | 1184.1693                  | 99.3                  | 5                          | II                     |
| 58   | 10     | 48     | -       | 57    | 8       | 49      | -        | 1184.6162                  | 99.3                  | -6                         | II                     |
| 58   | 10     | 48     | +       | 57    | 8       | 49      | +        | 1184.6182                  | 99.3                  | -5                         | II                     |
| 61   | 7      | 55     | -       | 60    | 5       | 56      | -        | 1186.8816                  | 99.1                  | 0                          | II                     |
| 59   | 10     | 50     | +       | 58    | 8       | 51      | +        | 1187.1566                  | 99.2                  | -4                         | II                     |
| 59   | 10     | 50     | -       | 58    | 8       | 51      | -        | 1187.1841                  | 99.4                  | 6                          | II                     |
| 61   | 10     | 52     | +       | 60    | 8       | 53      | +        | 1187.8084                  | 99.5                  | -11                        | II                     |
| 59   | 6      | 54     | +       | 58    | 4       | 55      | +        | 1187.8933                  | 99.4                  | 2                          | II                     |
| 57   | 5      | 53     | -       | 56    | 3       | 54      | -        | 1188.9943                  | 99.4                  | 12                         | II                     |
| 65   | 10     | 56     | -       | 64    | 8       | 57      | -        | 1189.4260                  | 99.3                  | -1                         | II                     |
| 65   | 7      | 59     | +       | 64    | 5       | 60      | +        | 1192.5357                  | 99.5                  | 1                          | II                     |
| 60   | 11     | 49     | +       | 59    | 9       | 50      | +        | 1192.6393                  | 99.1                  | 2                          | II                     |
