# Supplementary material for: High resolution spectroscopy of asymmetric top molecules in nonsinglet electronic states: the ν3 fundamental of chlorine dioxide (16O35Cl16O) free radical in the X2B1 electronic ground state
Source: Royal Society of Chemistry journal article supplement (doi:10.1039/d2cp05604f), 2023-01-01
Supplement: d2cp05604f1.zip [file d2cp05604f1.zip]

Electronic supplementary material S2 to

**High resolution spectroscopy of asymmetric top molecules in nonsinglet electronic states: The  $\nu_3$  fundamental of chlorine dioxide ( $^{16}\text{O}^{35}\text{Cl}^{16}\text{O}$ ) free radical in the  $X^2B_1$  electronic ground state**

Nonzero matrix elements of the  $^{(2)}H_{sp-rot}^v$  spin-rotational operator:

$$\begin{aligned} \langle NK\gamma, SJ | ^{(2)}H_{sp-rot}^v | NK\gamma, SJ \rangle &= \left\{ \frac{a_0}{2} + \frac{a}{2} \frac{K^2}{N(N+1)} - \delta_{K,1} \frac{b}{4} (-1)^\gamma \right\} \\ &\times \{J(J+1) - N(N+1) - S(S+1)\}, \end{aligned} \quad (1)$$

$$\begin{aligned} \langle NK\gamma, SJ | ^{(2)}H_{sp-rot}^v | NK \pm 2\gamma, SJ \rangle &= -b[(1 - \delta_{K,0})(1 - \delta_{K,2}\delta_{\Delta K,-2}) \\ &+ \sqrt{2}(\delta_{K,0} + \delta_{K,2}\delta_{\Delta K,-2})] \frac{J(J+1) - N(N+1) - S(S+1)}{4N(N+1)} \\ &\times \{(N \mp K)(N \pm K + 1)(N \mp K - 1)(N \pm K + 2)\}^{1/2}, \end{aligned} \quad (2)$$

$$\begin{aligned} \langle N - 1K\gamma, SJ | ^{(2)}H_{sp-rot}^v | NK\gamma' \neq \gamma, SJ \rangle &= -a \frac{K}{2N} \\ &\times \left\{ \frac{(N^2 - K^2)(N - J + S)(N + J + S + 1)(S + J - N + 1)(N + J - S)}{(2N - 1)(2N + 1)} \right\}^{1/2}, \end{aligned} \quad (3)$$
